# Supplementary material for: Divergent reactivity of sulfoxonium ylide with allyl carbonate and allyl carbamate
Source: Royal Society of Chemistry journal article supplement (doi:10.1039/d3cc01657a), 2023-01-01

## Electronic Supplementary Information

### Divergent Reactivity of Sulfoxonium Ylide with Allyl Carbonate and Allyl Carbamate

Vinayak Hanchate, Sudharshan Nagabhushana Reddy, Anil Kumar, and  
Kandikere Ramaiah Prabhu\*

Department of Organic Chemistry,  
Indian Institute of Science,  
Bangalore 560 012,  
Karnataka, India

\* E-mail: [prabhu@iisc.ac.in](mailto:prabhu@iisc.ac.in)

## Table of Contents

|                                                                       |    |
|-----------------------------------------------------------------------|----|
| General Information .....                                             | 3  |
| Experimental Section .....                                            | 4  |
| Detailed optimization studies .....                                   | 4  |
| Table SI – 1. Detail Optimization Studies for (4 + 2) Annulation..... | 4  |
| Table SI – 2. Detail Optimization Studies for (4 + 1) Annulation..... | 5  |
| General Procedure .....                                               | 8  |
| Unsuccessful Substrates .....                                         | 10 |
| Mechanistic Studies.....                                              | 11 |
| Mechanistic Study for (4 + 2) Annulation .....                        | 11 |
| Mechanistic Study for (4 + 1) Annulation .....                        | 15 |
| Control Experiments .....                                             | 19 |
| Characterization Data.....                                            | 20 |
| <sup>1</sup> H and <sup>13</sup> C NMR Spectra .....                  | 30 |

**Note** – References are provided in the footnote, wherever applicable.

## General Information

All chemicals were purchased from commercial suppliers and used as delivered unless otherwise specified. Reactions were carried out using distilled solvents. NMR spectra were recorded on a BRUKER-AV400 spectrometer in CDCl<sub>3</sub> and DMSO-d<sub>6</sub> (400 MHz, <sup>1</sup>H and 100 MHz, <sup>13</sup>C). Tetramethylsilane (TMS; δ = 0 ppm) or residual non-deuterated CDCl<sub>3</sub> signal (δ = 7.27 ppm); and residual non-deuterated DMSO signal (δ = 2.5 ppm) served as internal standards for <sup>1</sup>H NMR. The corresponding residual non-deuterated solvent signals (CDCl<sub>3</sub>: δ = 77.16 ppm; DMSO: δ = 39.50 ppm) were used as internal standards for <sup>13</sup>C NMR. Chemical shifts (δ) are reported in parts per million downfield from the internal reference and coupling constants in Hertz (Hz). IR spectra were measured using a Perkin-Elmer FT-IR Spectrometer. Mass spectra were measured with Micromass Q-TOF (ESI-HRMS). The melting points of the products were determined using a Buchi melting point apparatus. Flash column chromatography was carried out using commercially obtained silica gel, and thin-layer chromatography was carried out using Merck silica gel 60 F<sub>254</sub> TLC plates. Visualization was accomplished with short wave UV light or KMnO<sub>4</sub> staining solutions followed by heating. Flash column chromatography was performed using silica gel (230-400 mesh) with solvents distilled prior to use.

No attempts were made to optimize yields for substrate preparation. All spectral data obtained was according to the previously reported. All sulfoxonium ylide derivatives,<sup>1</sup> allyl carbonates derivatives,<sup>2</sup> and allyl carbamates<sup>3</sup> derivatives were prepared according to the reported literature procedure.

---

<sup>1</sup> (a) Liu, L.; Lin, J.; Pang, M.; Jin, H.; Yu, X.; Wang, S. Photo-Thermo-Mechanochemical Approach to Synthesize Quinolines via Addition/Cyclization of Sulfoxonium Ylides with 2-Vinylnilines Catalyzed by Iron(II) Phthalocyanine. *Org. Lett.* **2022**, *24*, 1146–1151. (b) Zhu, S.; Shi, K.; Zhu, H.; Jia, Z.-K.; Xia, X.-F.; Wang, D.; Zou, L.-H. Copper-Catalyzed Annulation or Homocoupling of Sulfoxonium Ylides: Synthesis of 2,3-Diaroylquinolines or α,α,β-Tricarbonyl Sulfoxonium Ylides. *Org. Lett.* **2020**, *22*, 1504–1509.

<sup>2</sup> Hoang, G. L.; Yang, Z.-D.; Smith, S. M.; Pal, R.; Miska, J. L.; Pérez, D. E.; Pelter, L. S. W.; Zeng, X. C.; Takacs, J. M. Enantioselective Desymmetrization via Carbonyl-Directed Catalytic Asymmetric Hydroboration and Suzuki–Miyaura Cross-Coupling. *Org. Lett.* **2015**, *17*, 940–943.

<sup>3</sup> Jeschke, S.; Gentshev, A.-C.; Wiemhöfer, H.-D. Disiloxanes with Cyclic or Non-Cyclic Carbamate Moieties as Electrolytes for Lithium-Ion Batteries. *Chem. Commun.* **2013**, *49*, 1190–1192.

## Experimental Section

### Table ESI – 1. Detail Optimization Studies for (4 + 2) Annulation

#### (a) Temperature, Solvent, and Additive Screening

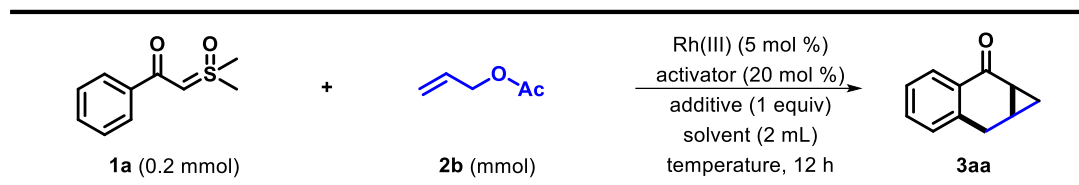

| entry | <b>2b</b><br>(mmol) | temp.<br>(°C) | solvent<br>(2 mL)  | additive<br>(1 equiv)                   | activator<br>(20 mol %) | yield<br>(%) |
|-------|---------------------|---------------|--------------------|-----------------------------------------|-------------------------|--------------|
| 1     | 0.4                 | 80            | DCE                | AcOH                                    | AgSbF <sub>6</sub>      | 18           |
| 2     | 0.4                 | 100           | DCE                | AcOH                                    | AgSbF <sub>6</sub>      | 5            |
| 3     | 0.4                 | 60            | DCE                | AcOH                                    | AgSbF <sub>6</sub>      | 14           |
| 4     | 0.4                 | 40            | DCE                | AcOH                                    | AgSbF <sub>6</sub>      | 10           |
| 5     | 0.4                 | rt            | DCE                | AcOH                                    | AgSbF <sub>6</sub>      | 5            |
| 6     | 0.4                 | 80            | TFE                | AcOH                                    | AgSbF <sub>6</sub>      | 12           |
| 7     | 0.4                 | 80            | EtOAc              | AcOH                                    | AgSbF <sub>6</sub>      | 21           |
| 8     | 0.4                 | 80            | 1,4-dioxane        | AcOH                                    | AgSbF <sub>6</sub>      | 21           |
| 9     | 0.4                 | 80            | EtOH               | AcOH                                    | AgSbF <sub>6</sub>      | 00           |
| 10    | 0.4                 | 80            | THF                | AcOH                                    | AgSbF <sub>6</sub>      | 00           |
| 11    | 0.4                 | 80            | CH <sub>3</sub> CN | AcOH                                    | AgSbF <sub>6</sub>      | 38           |
| 12    | 0.4                 | 80            | toluene            | AcOH                                    | AgSbF <sub>6</sub>      | 23           |
| 13    | 0.4                 | 80            | HEIP               | AcOH                                    | AgSbF <sub>6</sub>      | 04           |
| 14    | 0.4                 | 80            | DMSO               | AcOH                                    | AgSbF <sub>6</sub>      | 00           |
| 15    | 0.4                 | 80            | CH <sub>3</sub> CN | --                                      | AgSbF <sub>6</sub>      | 32           |
| 16    | 0.4                 | 80            | CH <sub>3</sub> CN | NaOAc                                   | AgSbF <sub>6</sub>      | 08           |
| 17    | 0.4                 | 80            | CH <sub>3</sub> CN | AcOH + NaOAc                            | AgSbF <sub>6</sub>      | 16           |
| 18    | 0.4                 | 80            | CH <sub>3</sub> CN | AcOH (0.5)                              | AgSbF <sub>6</sub>      | 34           |
| 19    | 0.8                 | 80            | CH <sub>3</sub> CN | AcOH                                    | AgSbF <sub>6</sub>      | 42           |
| 20    | 0.4                 | 80            | CH <sub>3</sub> CN | Cu(OAc) <sub>2</sub> .H <sub>2</sub> O  | AgSbF <sub>6</sub>      | --           |
| 21    | 0.8                 | 80            | CH <sub>3</sub> CN | PivOH                                   | AgSbF <sub>6</sub>      | 41           |
| 22    | 0.8                 | 80            | CH <sub>3</sub> CN | AdCO <sub>2</sub> H                     | AgSbF <sub>6</sub>      | 51           |
| 23    | 0.8                 | 80            | CH <sub>3</sub> CN | ClCH <sub>2</sub> CO <sub>2</sub> H     | AgSbF <sub>6</sub>      | 56           |
| 24    | 0.8                 | 80            | CH <sub>3</sub> CN | H <sub>2</sub> O (10)                   | AgSbF <sub>6</sub>      | 40           |
| 25    | 0.8                 | 80            | CH <sub>3</sub> CN | PhCO <sub>2</sub> H                     | AgSbF <sub>6</sub>      | 44           |
| 26    | 0.8                 | 80            | CH <sub>3</sub> CN | propionic acid                          | AgSbF <sub>6</sub>      | 45           |
| 27    | 0.8                 | 80            | CH <sub>3</sub> CN | TFA                                     | AgSbF <sub>6</sub>      | --           |
| 28    | 0.8                 | 80            | CH <sub>3</sub> CN | Zn(OAc) <sub>2</sub> .2H <sub>2</sub> O | AgSbF <sub>6</sub>      | 39           |
| 29    | 0.8                 | 80            | CH <sub>3</sub> CN | Cl <sub>2</sub> CHCO <sub>2</sub> H     | AgSbF <sub>6</sub>      | 23           |
| 30    | 0.8                 | 80            | CH <sub>3</sub> CN | Cl <sub>3</sub> CHCO <sub>2</sub> H     | AgSbF <sub>6</sub>      | 07           |

**(b) Other Parameters Screening**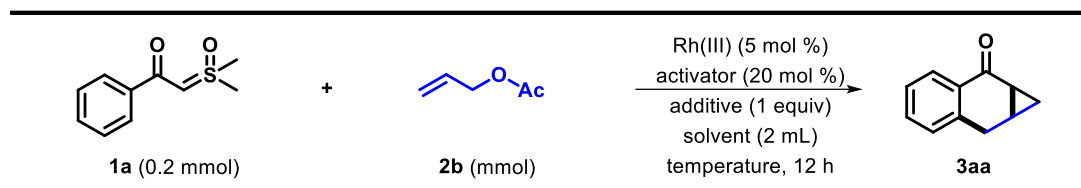

| entry | <b>2b</b><br>(mmol) | temp.<br>(°C) | solvent<br>(2 mL)         | additive<br>(1 equiv)                     | activator<br>(20 mol %) | yield<br>(%) |
|-------|---------------------|---------------|---------------------------|-------------------------------------------|-------------------------|--------------|
| 31    | 0.8                 | 80            | CH <sub>3</sub> CN        | ClCH <sub>2</sub> CO <sub>2</sub> H       | AgBF <sub>4</sub>       | 42           |
| 32    | 0.8                 | 80            | CH <sub>3</sub> CN        | ClCH <sub>2</sub> CO <sub>2</sub> H       | AgNTf <sub>2</sub>      | 62           |
| 33    | 0.8                 | 80            | CH <sub>3</sub> CN        | ClCH <sub>2</sub> CO <sub>2</sub> H       | AgPF <sub>6</sub>       | 57           |
| 34    | 0.8                 | 80            | CH <sub>3</sub> CN        | ClCH <sub>2</sub> CO <sub>2</sub> H (0.2) | AgNTf <sub>2</sub>      | 46           |
| 35    | 0.8                 | 80            | CH <sub>3</sub> CN        | ClCH <sub>2</sub> CO <sub>2</sub> H (2)   | AgNTf <sub>2</sub>      | 54           |
| 36    | 0.8                 | 80            | CH <sub>3</sub> CN (1 mL) | ClCH <sub>2</sub> CO <sub>2</sub> H       | AgNTf <sub>2</sub>      | 64           |
| 37    | 0.8                 | 80            | CH <sub>3</sub> CN (4 mL) | ClCH <sub>2</sub> CO <sub>2</sub> H       | AgNTf <sub>2</sub>      | 46           |
| 38    | 0.8                 | 90            | CH <sub>3</sub> CN (1 mL) | ClCH <sub>2</sub> CO <sub>2</sub> H       | AgNTf <sub>2</sub>      | 33           |
| 39    | 0.8                 | 70            | CH <sub>3</sub> CN (1 mL) | ClCH <sub>2</sub> CO <sub>2</sub> H       | AgNTf <sub>2</sub>      | 68           |
| 40    | 0.8                 | 60            | CH <sub>3</sub> CN (1 mL) | ClCH <sub>2</sub> CO <sub>2</sub> H       | AgNTf <sub>2</sub>      | 62           |
| 41    | 0.6                 | 60            | CH <sub>3</sub> CN (1 mL) | ClCH <sub>2</sub> CO <sub>2</sub> H       | AgNTf <sub>2</sub>      | 55           |
| 42    | 1.0                 | 60            | CH <sub>3</sub> CN (1 mL) | ClCH <sub>2</sub> CO <sub>2</sub> H       | AgNTf <sub>2</sub>      | 60           |

**(c) Allyl carbonate Substrate Screening**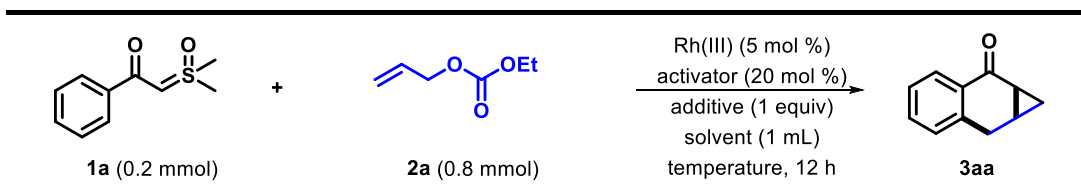

| entry           | <b>2a</b><br>(mmol) | temp.<br>(°C) | solvent<br>(1 mL)  | additive<br>(1 equiv)               | activator<br>(20 mol %) | yield<br>(%) |
|-----------------|---------------------|---------------|--------------------|-------------------------------------|-------------------------|--------------|
| 43              | 0.8                 | 70            | CH <sub>3</sub> CN | ClCH <sub>2</sub> CO <sub>2</sub> H | AgNTf <sub>2</sub>      | 68           |
| 44              | 0.8                 | 60            | CH <sub>3</sub> CN | ClCH <sub>2</sub> CO <sub>2</sub> H | AgNTf <sub>2</sub>      | 76 (73)      |
| 45              | 0.8                 | 50            | CH <sub>3</sub> CN | ClCH <sub>2</sub> CO <sub>2</sub> H | AgNTf <sub>2</sub>      | 55           |
| 46 <sup>a</sup> | 0.8                 | 50            | CH <sub>3</sub> CN | ClCH <sub>2</sub> CO <sub>2</sub> H | AgNTf <sub>2</sub>      | 56           |
| 47 <sup>b</sup> | 0.8                 | 50            | CH <sub>3</sub> CN | ClCH <sub>2</sub> CO <sub>2</sub> H | AgNTf <sub>2</sub>      | 75           |
| 48 <sup>c</sup> | 0.8                 | 50            | CH <sub>3</sub> CN | ClCH <sub>2</sub> CO <sub>2</sub> H | AgNTf <sub>2</sub>      | 60           |

<sup>a</sup> 2.5 mol % of catalyst loading. <sup>b</sup> 7.5 mol % of catalyst loading. <sup>c</sup> Under air atmosphere.

Optimization table SI-1, experimentations have been performed as shown in *general experimental procedure A*. In all the cases, the crude products were submitted directly for <sup>1</sup>H-NMR analysis for calculating the yields in which 1,3,5-trimethoxybenzene (11.2 mg, 0.0667 mmol) has been used as an internal standard isolated yield in parenthesis. nd = not detected.

**Table ESI – 2. Detail Optimization Studies for (4 + 1) Annulation****(a) Solvent, Temperature, Additive, and Activator Screening**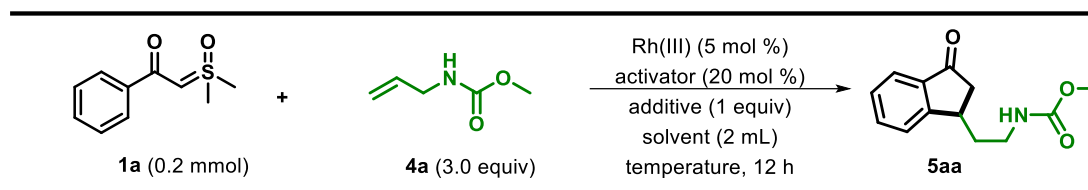

| entry | solvent<br>(1 mL)  | temp.<br>(°C) | additive<br>(1 equiv)              | activator<br>(20 mol %) | yield<br>(%) |
|-------|--------------------|---------------|------------------------------------|-------------------------|--------------|
| 1     | TFE                | 80            | NaOAc                              | AgSbF <sub>6</sub>      | 30           |
| 2     | HFIP               | 80            | NaOAc                              | AgSbF <sub>6</sub>      | 48           |
| 3     | EtOH               | 80            | NaOAc                              | AgSbF <sub>6</sub>      | nd           |
| 4     | THF                | 80            | NaOAc                              | AgSbF <sub>6</sub>      | nd           |
| 5     | EtOAc              | 80            | NaOAc                              | AgSbF <sub>6</sub>      | 10           |
| 6     | toluene            | 80            | NaOAc                              | AgSbF <sub>6</sub>      | trace        |
| 7     | dioxane            | 80            | NaOAc                              | AgSbF <sub>6</sub>      | 18           |
| 8     | CH <sub>3</sub> CN | 80            | NaOAc                              | AgSbF <sub>6</sub>      | 10           |
| 9     | DCE                | 80            | NaOAc                              | AgSbF <sub>6</sub>      | 9            |
| 10    | HFIP               | 60            | NaOAc                              | AgSbF <sub>6</sub>      | 43           |
| 11    | HFIP               | 90            | NaOAc                              | AgSbF <sub>6</sub>      | 48           |
| 12    | HFIP               | 100           | NaOAc                              | AgSbF <sub>6</sub>      | 44           |
| 13    | HFIP               | 80            | Na <sub>2</sub> CO <sub>3</sub>    | AgSbF <sub>6</sub>      | 32           |
| 14    | HFIP               | 80            | NaOPiv (1 w/w)                     | AgSbF <sub>6</sub>      | 51           |
| 15    | HFIP               | 80            | HCO <sub>2</sub> Na                | AgSbF <sub>6</sub>      | nd           |
| 16    | HFIP               | 80            | CsOAc                              | AgSbF <sub>6</sub>      | 36           |
| 17    | HFIP               | 80            | F <sub>3</sub> CCO <sub>2</sub> Na | AgSbF <sub>6</sub>      | 25           |
| 18    | HFIP               | 80            | LiOAc                              | AgSbF <sub>6</sub>      | 35           |
| 19    | HFIP               | 80            | Cs <sub>2</sub> CO <sub>3</sub>    | AgSbF <sub>6</sub>      | nr           |
| 20    | HFIP               | 80            | CsOPiv                             | AgSbF <sub>6</sub>      | 42           |
| 21    | HFIP               | 80            | NaOPiv (2 w/w)                     | AgSbF <sub>6</sub>      | 58           |
| 22    | HFIP               | 80            | NaOPiv (3 w/w)                     | AgSbF <sub>6</sub>      | 59           |
| 23    | HFIP               | 80            | NaOPiv (2 w/w)                     | AgNTf <sub>2</sub>      | 58           |
| 24    | HFIP               | 80            | NaOPiv (2 w/w)                     | AgBF <sub>4</sub>       | 59           |
| 25    | HFIP               | 80            | NaOPiv (2 w/w)                     | AgPF <sub>6</sub>       | 57           |

**(a) Other Parameters Screening**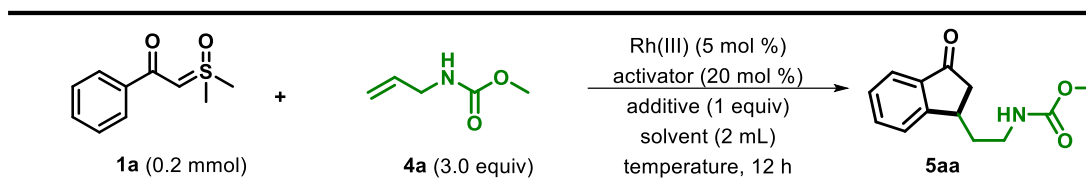

| entry           | solvent<br>(1 mL) | temp.<br>(°C) | additive<br>(1 equiv)                     | activator<br>(20 mol %) | yield<br>(%) |
|-----------------|-------------------|---------------|-------------------------------------------|-------------------------|--------------|
| 26 <sup>a</sup> | HFIP              | 80            | NaOAc                                     | AgSbF <sub>6</sub>      | 54           |
| 27 <sup>b</sup> | HFIP              | 80            | NaOAc                                     | AgSbF <sub>6</sub>      | 57           |
| 28 <sup>c</sup> | HFIP              | 80            | NaOAc                                     | AgSbF <sub>6</sub>      | 51           |
| 29 <sup>d</sup> | HFIP              | 80            | NaOAc                                     | AgSbF <sub>6</sub>      | 58           |
| 30              | HFIP              | 80            | NaOPiv (2 w/w) + 5 equiv H <sub>2</sub> O | AgSbF <sub>6</sub>      | 35           |
| 31              | HFIP              | 80            | NaOPiv (2 w/w) + 4 ÅMS (2 w/w)            | AgSbF <sub>6</sub>      | 73 (71)      |
| 32              | HFIP              | 80            | NaOPiv (2 w/w) + 4 ÅMS (3 w/w)            | AgSbF <sub>6</sub>      | 69           |

<sup>a</sup> 2.0 equiv of allyl methyl carbamate was used. <sup>b</sup> 4.0 equiv of allyl methyl carbamate was used. <sup>c</sup> Solvent HFIP (0.5 mL) used. <sup>d</sup> Solvent HFIP (2.0 mL) used.

Optimization table SI-2, experimentations have been performed as shown in *general experimental procedure B*. In all the cases, the crude products were submitted directly for <sup>1</sup>H-NMR analysis for calculating the yields in which 1,3,5-trimethoxybenzene (11.2 mg, 0.0667 mmol) has been used as an internal standard; isolated yield in parenthesis. nd = not detected.

## General Procedure

### A. Experimental procedure for (4 + 2) annulation

To an oven-dried 8-mL screw-cap reaction vial, equipped with a magnetic stir bar was charged with sulfoxonium ylides (0.2 mmol) and allyl carbonate derivatives (0.8 mmol, 4.0 equiv), catalyst  $[\text{Cp}^*\text{RhCl}_2]_2$  (6.2 mg, 5 mol %, 0.05 equiv), activator  $\text{AgNTf}_2$  (16 mg, 20 mol %, 0.2 equiv), additive chloroacetic acid (19.0 mg, 0.2 mmol, 1.0 equiv), and acetonitrile solvent (1 mL). The vial was sealed under argon atmosphere with a screw cap and placed in a pre-heated metal block at 60 °C, and the reaction mixture was stirred at the same temperature for 12 h. After completion of the reaction, the reaction mixture was cooled to room temperature, filtered through a silica (100-200 mesh size) pad using a mixture of EtOAc and petroleum ether (1:1, 100 mL), and concentrated under vacuo. In the optimization Table-1, the crude products were submitted directly for  $^1\text{H-NMR}$  analysis for calculating the yields wherein 1,3,5-trimethoxybenzene (11.2 mg, 0.0667 mmol) has been used as an internal standard. For the substrate scope (Scheme – 2, left column), the crude product was purified on a silica gel (100-200 mesh size) flash column chromatography using EtOAc/ petroleum ether as eluent (1:99 to 3:97 v/v) to obtain the desired cyclopropanation product.

### B. Experimental procedure for (4 + 1) annulation.

To an oven-dried 8-mL screw-cap reaction vial, equipped with a magnetic stir bar was charged with sulfoxonium ylides (0.2 mmol) and allyl carbamate derivatives (0.6 mmol, 3.0 equiv), catalyst  $[\text{Cp}^*\text{RhCl}_2]_2$  (6.2 mg, 5 mol %, 0.05 equiv), activator  $\text{AgSbF}_6$  (13.4 mg, 20 mol %, 0.2 equiv), additive sodium pivalate hydrated (2 times w/w), powder molecular sieves 4 Å (2 times w/w), and HFIP solvent (2 mL). The vial was sealed under argon atmosphere with a screw cap and placed in a pre-heated metal block at 80 °C, and the reaction mixture was stirred at the same temperature for 16 h. After completion of the reaction, the reaction mixture was cooled to room temperature, filtered through a silica (100-200 mesh size) pad using a mixture of EtOAc and petroleum ether (1:1, 100 mL), and concentrated under vacuo. In the optimization Table-2, the crude products were submitted directly for  $^1\text{H-NMR}$  analysis for calculating the yields wherein 1,3,5-trimethoxybenzene (11.2 mg, 0.0667 mmol) has been used as an internal standard. For the substrate scope (Scheme – 2, right column), the crude product was purified on a silica gel (100-200 mesh size) flash column chromatography using EtOAc/petroleum ether as eluent (10:90 to 30:90 v/v) to obtain the desired indanone product.



**C. Experimental procedure for the scale-up reaction of (4 + 2) annulation (3aa).**

To an oven-dried 50-mL screw-cap reaction vial, equipped with a magnetic stir bar was charged with sulfoxonium ylides **1a** (1.0 g, 5.1 mmol) and allyl ethyl carbonate (2.65 g, 20.4 mmol, 4.0 equiv), [Cp\*RhCl<sub>2</sub>]<sub>2</sub> (0.15 g, 5 mol %, 0.05 equiv), AgNTf<sub>2</sub> (0.4 g, 20 mol %, 0.2 equiv), additive chloroacetic acid (0.48 mg, 0.51 mmol, 1.0 equiv), and acetonitrile solvent (20 mL, 0.4 M). The tube was sealed under argon atmosphere with a screw cap and placed in a pre-heated oil bath at 60 °C, and the reaction mixture was stirred at the same temperature for 12 h. After completion of the reaction, the reaction mixture was cooled to room temperature, filtered through a silica (100-200 mesh size) pad using a mixture of EtOAc and petroleum ether (1:1, 100 mL), and concentrated under vacuo. The crude product was purified on a silica gel (100-200 mesh size) flash column chromatography using EtOAc/ petroleum ether as eluent (1:99 to 3:97 v/v) to obtain the desired cyclopropanation product in 70% yield (0.565 g).

**D. Experimental procedure for the scale-up reaction of (4 + 1) annulation (5aa).**

To an oven-dried 50-mL screw-cap reaction vial, equipped with a magnetic stir bar was charged with sulfoxonium ylides **1a** (1.0 g, 5.1 mmol) and allyl methyl carbamate (1.75 g, 15.3 mmol, 3.0 equiv), [Cp\*RhCl<sub>2</sub>]<sub>2</sub> (0.12 g, 5 mol %, 0.05 equiv), AgSbF<sub>6</sub> (0.35 g, 20 mol %, 0.2 equiv), additive sodium pivalate hydrated (2.0 g, 2 times w/w), powder molecular sieves 4 Å (2.0 g, 2 times w/w), and HFIP solvent (50 mL, 1M). After completion of the reaction, the reaction mixture was cooled to room temperature, filtered through a silica (100-200 mesh size) pad using a mixture of EtOAc and petroleum ether (1:1, 100 mL), and concentrated under vacuo. The crude product was purified on a silica gel (100-200 mesh size) flash column chromatography using EtOAc/ petroleum ether as eluent (10:90 to 30:90 v/v) to obtain the desired cyclopropanation product in 67% yield (0.802 g).

## Unsuccessful Substrates

### Scheme-ESI-1. Scope for ylides, allyl carbonates, and allyl carbamates.

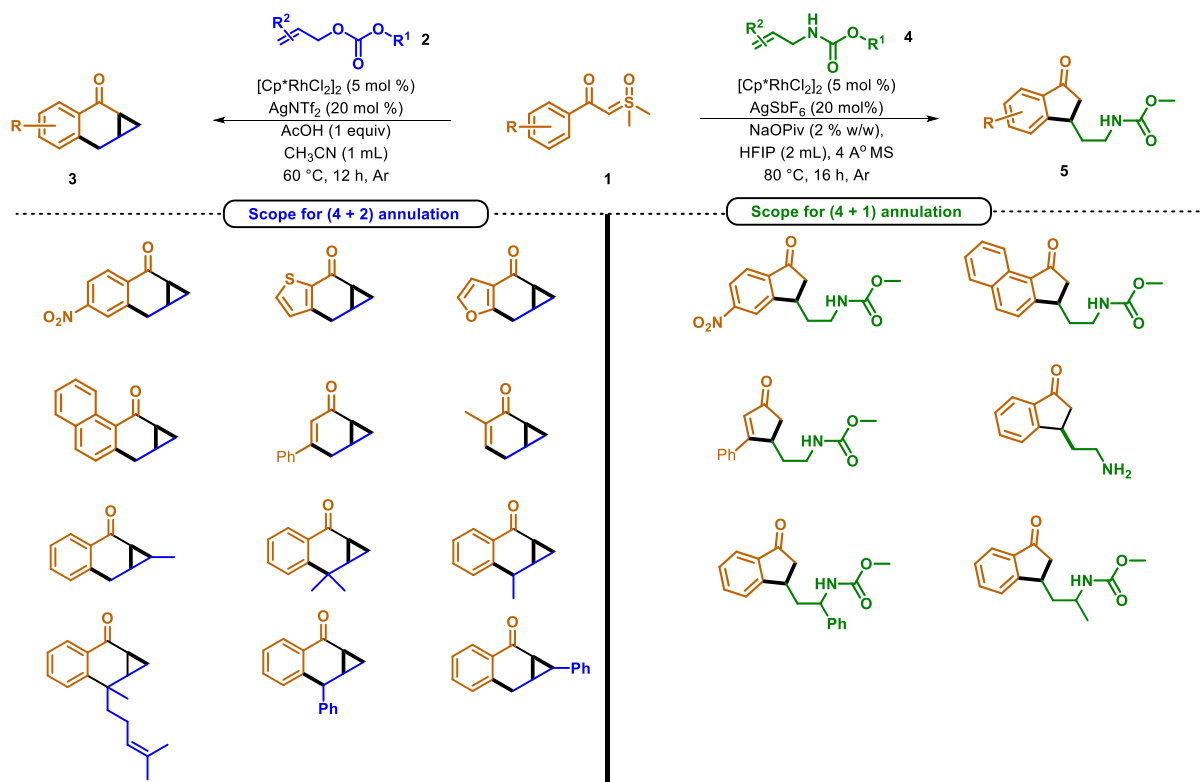

## Mechanistic Studies

### 1. Mechanistic Study for (4 + 2) Annulation

#### (a) Deuteration incorporation studies

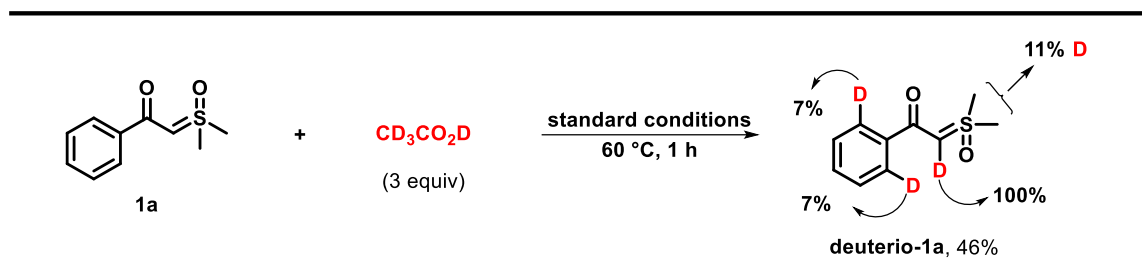

To an oven-dried 8-mL screw-cap reaction vial, equipped with a magnetic stir bar was charged with sulfoxonium ylide **1a** (39.3 mg, 0.2 mmol),  $\text{CD}_3\text{CO}_2\text{D}$  (38.4 mg, 0.6 mmol, 3.0 equiv),  $[\text{Cp}^*\text{RhCl}_2]_2$  (6.2 mg, 5 mol%, 0.05 equiv),  $\text{AgNTf}_2$  (16 mg, 20 mol %, 0.2 equiv), chloroacetic acid (19.0 mg, 0.2 mmol, 1.0 equiv), and acetonitrile solvent (1 mL, 0.5 M). The vial was sealed under argon atmosphere sealed with a screw cap and placed in a pre-heated metal block at 60 °C, and the reaction mixture was stirred at the same temperature for 12 h. After completion of the reaction, the reaction mixture was cooled to room temperature. The crude reaction mixture was purified on a silica gel column (5% MeOH in EtOAc) to give the desired product **deuterio-1a** in 46% yield. The deuterium incorporation was calculated from  $^1\text{H}$ -NMR spectroscopy (see the following  $^1\text{H}$  NMR spectrum).

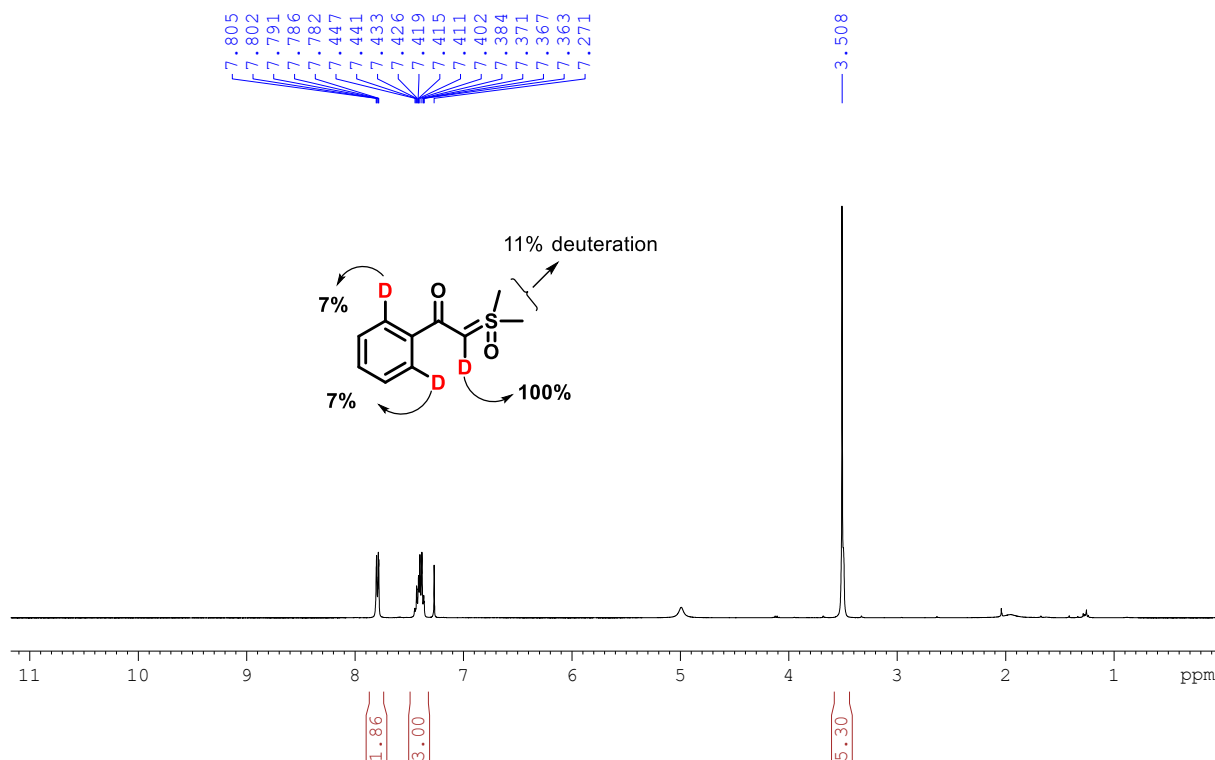

**(b) Kinetic isotopic effect studies**
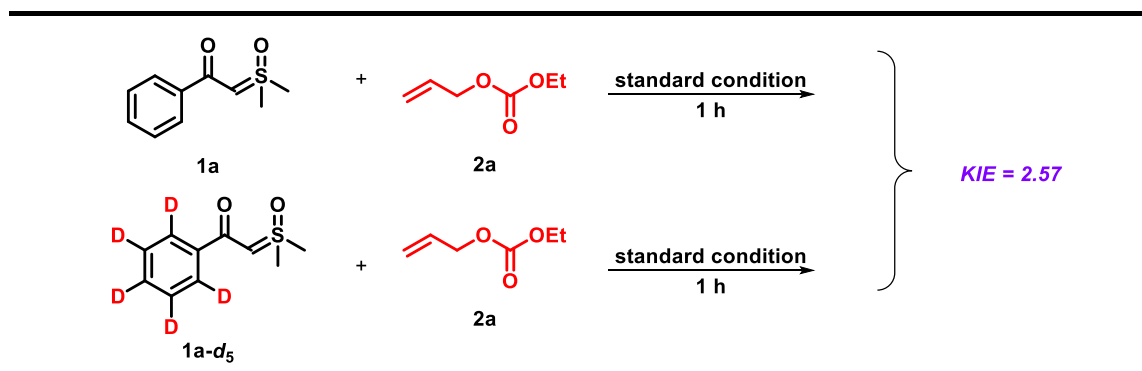

**Kinetic isotopic effect studies using 1a/1a-d<sub>5</sub> (parallel reactions):** Two oven-dried 8-mL screw-cap reaction vials, equipped with a magnetic stir bar was charged with sulfoxonium ylide **1a** (39.3 mg, 0.2 mmol), and **1a-d<sub>5</sub>** (40.3 mg, 0.2 mmol) separately. To each vial were added ethyl allyl carbonate **2c** (26.1 mg, 0.2 mmol, 1.0 equiv), [Cp\**Rh*Cl<sub>2</sub>]<sub>2</sub> (6.2 mg, 5 mol %, 0.05 equiv), AgNTf<sub>2</sub> (16 mg, 20 mol %, 0.2 equiv), chloroacetic acid (19.0 mg, 0.2 mmol, 1.0 equiv), and acetonitrile solvent (1 mL, 0.5 M). The vial was sealed under argon atmosphere sealed with a screw cap and placed in a pre-heated metal block at 60 °C, and the reaction mixture was stirred at the same temperature for 1 h. After that, the reaction mixtures were cooled to 0 °C rapidly and was quenched with pentane. These two reaction mixtures were combined, and the solvent was removed under vacuum. The residue was purified on a silica gel column to obtain a mixture of **3aa** and **3aa-d<sub>4</sub>** as a colorless oil. Based on <sup>1</sup>H-NMR analysis, the calculated *KIE* value is 2.57.

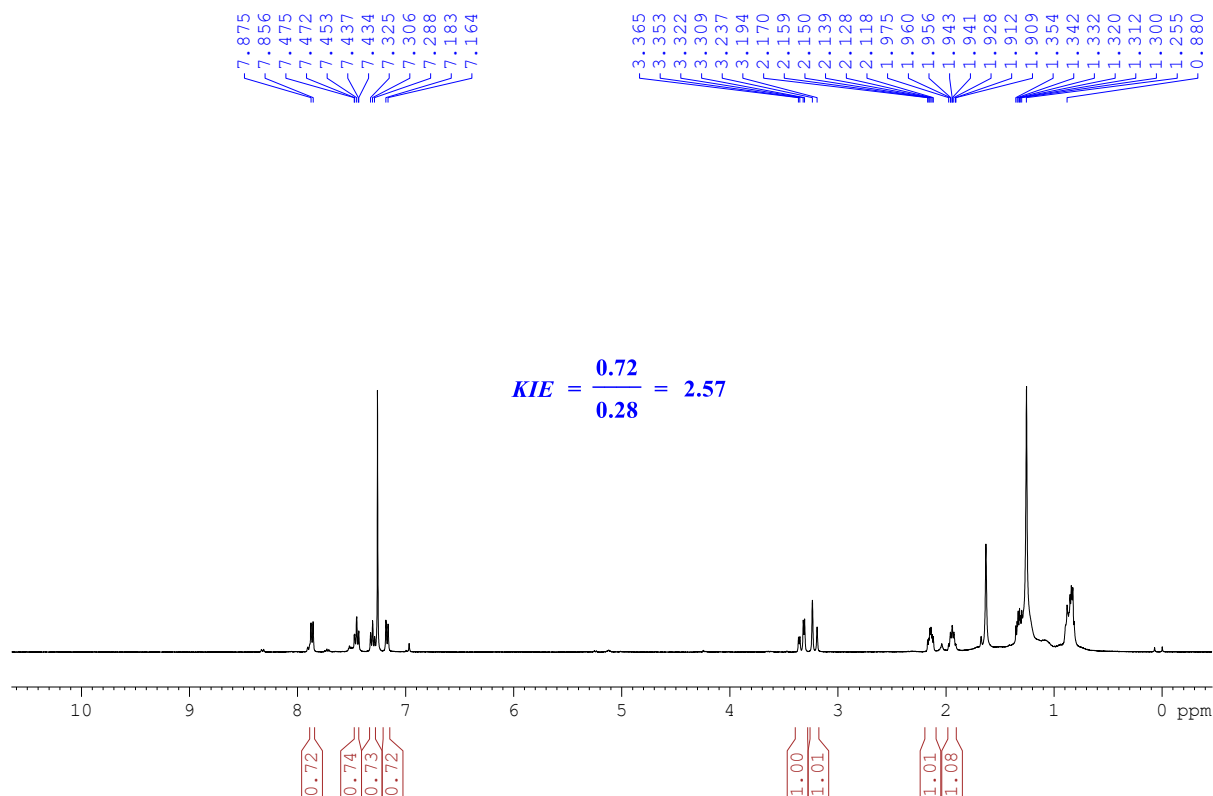

**(c) Reaction in the presence of deuterated acetic acid**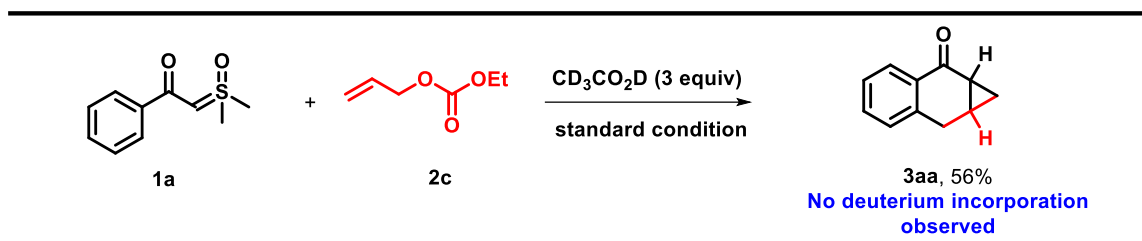

To an oven-dried 8-mL screw-cap reaction vial, equipped with a magnetic stir bar was charged with sulfonium ylides **1a** (40 mg, 0.2 mmol) and allyl ethyl carbonate **2c** (104 mg, 0.8 mmol), catalyst  $[\text{Cp}^*\text{RhCl}_2]_2$  (6.2 mg, 5 mol %, 0.05 equiv),  $\text{AgNTf}_2$  (16 mg, 20 mol %, 0.2 equiv), chloroacetic acid (19.0 mg, 0.2 mmol, 1.0 equiv), and acetonitrile solvent (1 mL, 0.5 M). The vial was sealed under argon atmosphere sealed with a screw cap and placed in a pre-heated metal block at 60 °C, and the reaction mixture was stirred at the same temperature for 12 h. After completion of the reaction, the reaction mixture was cooled to room temperature, filtered through a short silica (100-200 mesh size) bed using a mixture of EtOAc and petroleum ether (1:1, 100 mL), and concentrated under vacuo. The crude product was purified on a silica gel (100-200 mesh size) flash column chromatography using EtOAc/petroleum ether as eluent (1:99 to 3:97 v/v) to obtain the desired cyclopropanation product **3aa** in 56% yield (18 mg). No deuterium incorporation was observed in cyclopropane ring.

## 2. Mechanistic Study for (4 + 1) Annulation

### (d) Deuteration incorporation studies

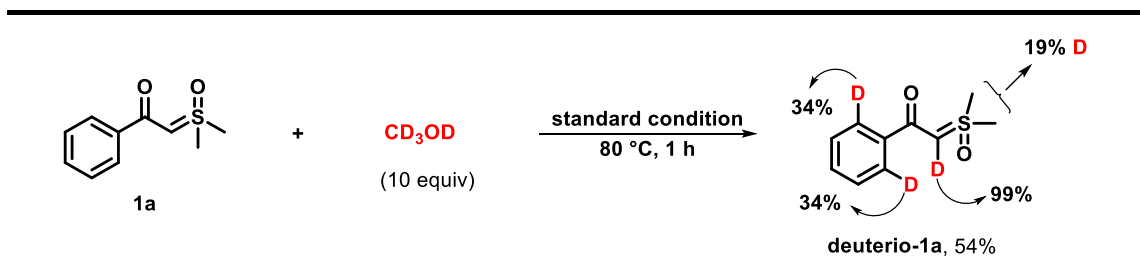

To an oven-dried 8-mL screw-cap reaction vial, equipped with a magnetic stir bar was charged with sulfoxonium ylide **1a** (39.3 mg, 0.2 mmol),  $\text{CD}_3\text{OD}$  (72.0 mg, 2.0 mmol, 10.0 equiv),  $[\text{Cp}^*\text{RhCl}_2]_2$  (6.2 mg, 5 mol%, 0.05 equiv),  $\text{AgNTf}_2$  (16 mg, 20 mol %, 0.2 equiv), chloroacetic acid (19.0 mg, 0.2 mmol, 1.0 equiv), and acetonitrile solvent (1 mL, 0.5 M). The vial was sealed under argon atmosphere sealed with a screw cap and placed in a pre-heated metal block at  $80\text{ }^\circ\text{C}$ , and the reaction mixture was stirred at the same temperature for 1 h. After completion of the reaction, the reaction mixture was cooled to room temperature. The crude reaction mixture was purified on a silica gel column (5% MeOH in EtOAc) to give the desired product **deuterio-1a** in 54% yield. The deuterium incorporation was calculated from  $^1\text{H}$ -NMR spectroscopy (see the following  $^1\text{H}$  NMR spectrum).

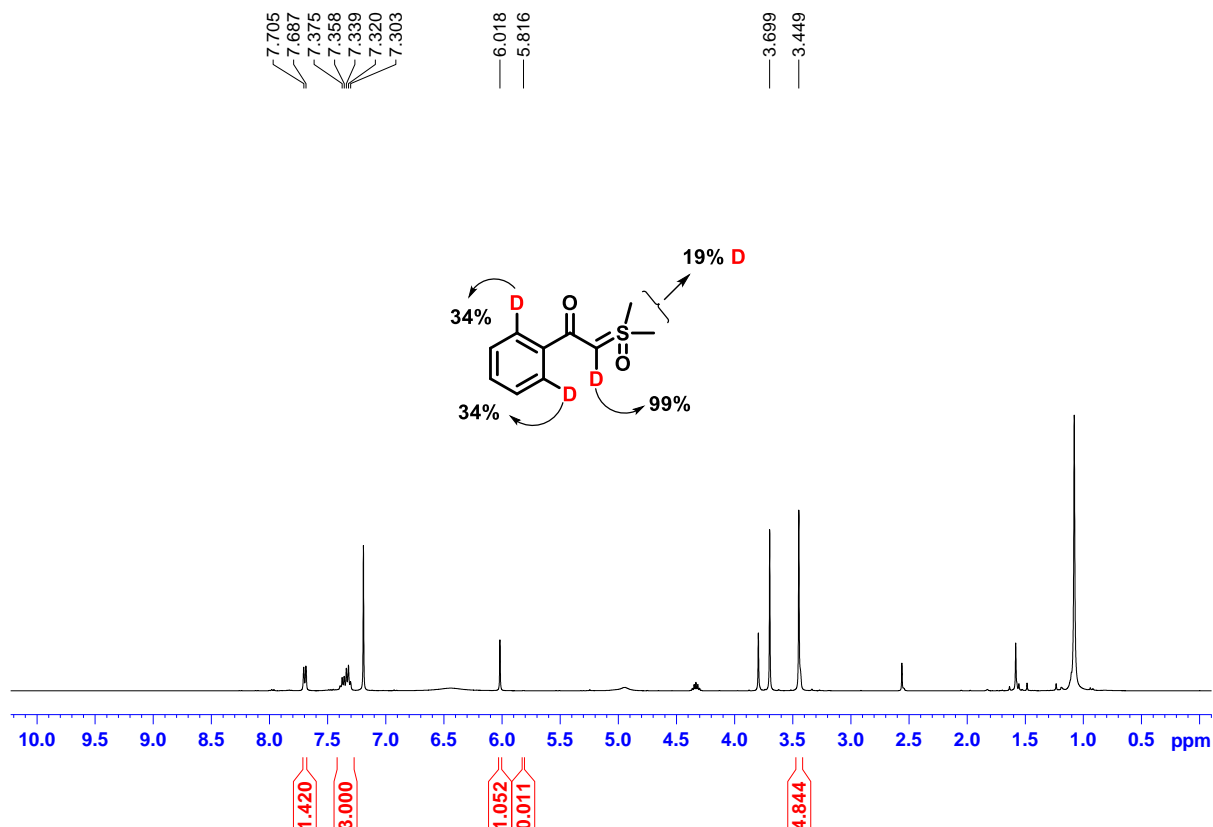

**(e) Kinetic isotopic effect studies**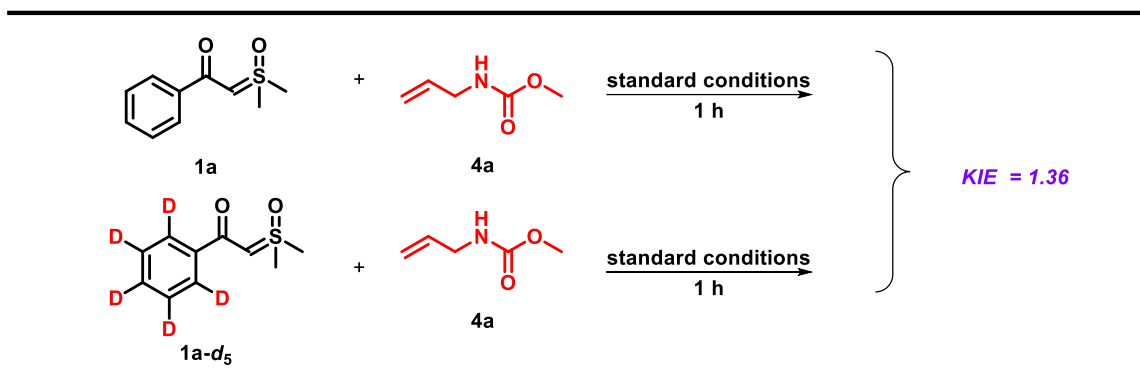

**Kinetic isotopic effect studies using **1a/1a-d<sub>5</sub>** (parallel reactions):** Two oven-dried 8-mL screw-cap reaction vials, equipped with a magnetic stir bar was charged with sulfoxonium ylide **1a** (39.3 mg, 0.2 mmol), and **1a-d<sub>5</sub>** (40.3 mg, 0.2 mmol) separately. To each vial were added allyl methyl carbamate **4a** (23.1 mg, 0.2 mmol, 1.0 equiv), [Cp\*RhCl<sub>2</sub>]<sub>2</sub> (6.2 mg, 5 mol %, 0.05 equiv), AgSbF<sub>6</sub> (13.4 mg, 20 mol %, 0.2 equiv), sodium pivalate hydrated (80 mg, 2 times w/w), powder molecular sieves 4 Å (80 mg, 2 times w/w), and HFIP solvent (2 mL, 1M). The vial was sealed under argon atmosphere sealed with a screw cap and placed in a pre-heated metal block at 80 °C, and the reaction mixture was stirred at the same temperature for 1 h. After that, the reaction mixtures were cooled to 0 °C rapidly and was quenched with pentane. After that, the crude products were directly submitted for <sup>1</sup>H-NMR analysis for calculating the yield, wherein 1,3,5-trimethoxybenzene (11.2 mg, 0.667 mmol) has been used as an internal standard. The calculated yield for substrate **1a** is 67%, whereas for substrate **1a-d<sub>5</sub>** is 49%. Based on observed yields, the calculated *KIE* value is 1.36.

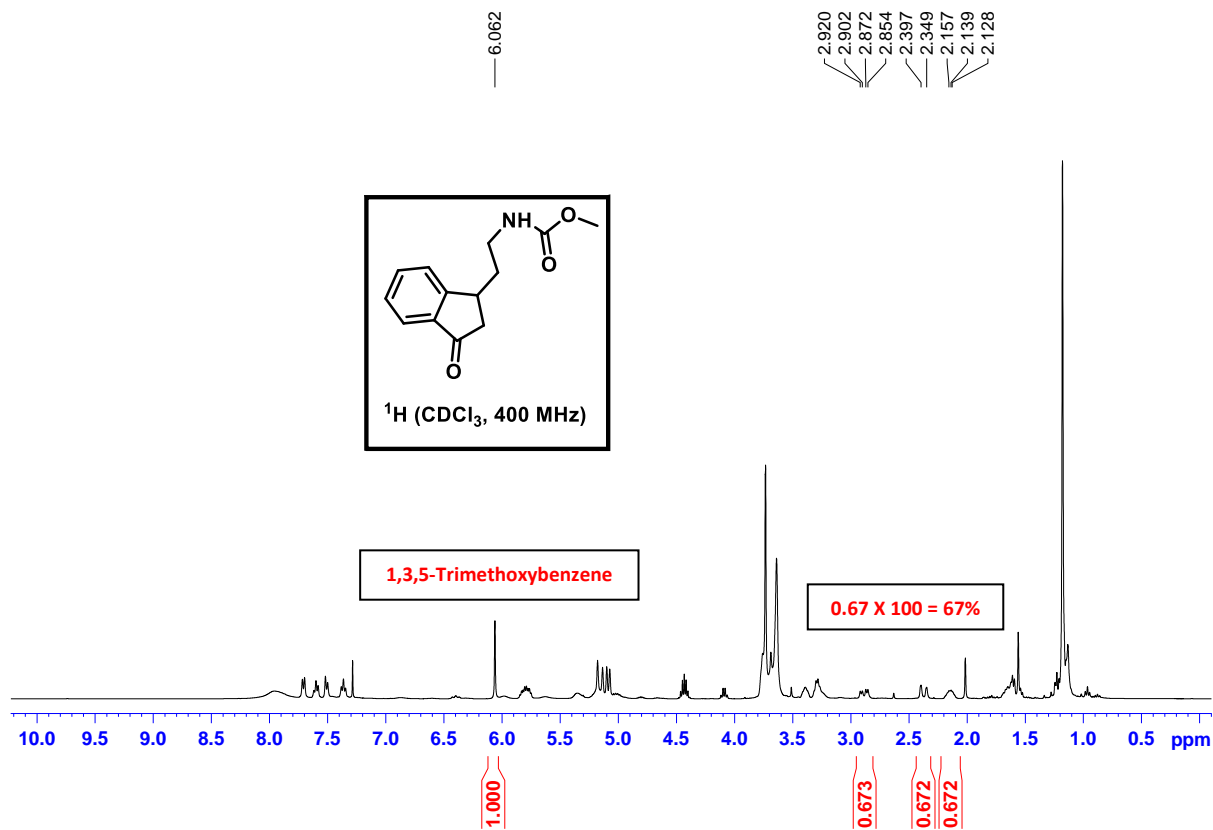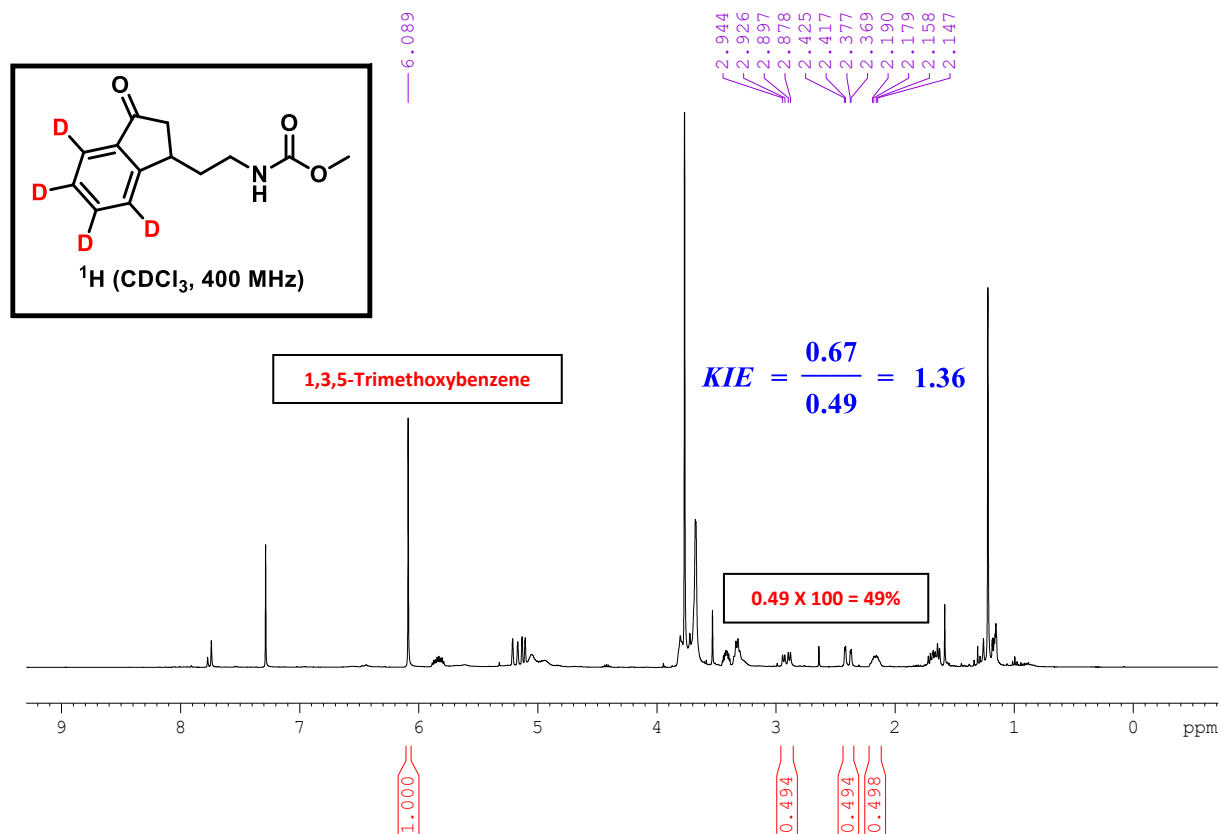



**(f) Reaction in the presence of deuterated sulfoxonium ylides**

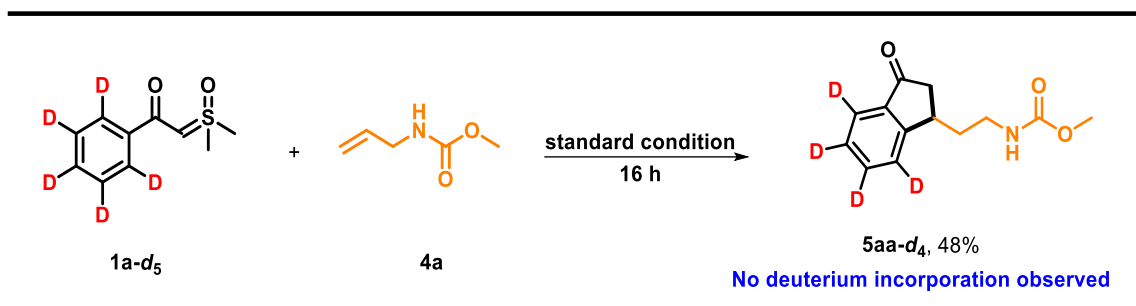

To an oven-dried 8-mL screw-cap reaction vial, equipped with a magnetic stir bar was charged with deuterated sulfoxonium ylides **1a-d<sub>5</sub>** (40.3 mg, 0.2 mmol) and allyl methyl carbamate **4a** (69.1 mg, 0.6 mmol, 3.0 equiv), [Cp\**Rh*Cl<sub>2</sub>]<sub>2</sub> (6.2 mg, 5 mol %, 0.05 equiv), AgSbF<sub>6</sub> (13.7 mg, 20 mol %, 0.2 equiv), sodium pivalate hydrated (80 mg, 2 times w/w), powder molecular sieves 4A<sup>o</sup> (80 mg, 2 times w/w), and HFIP solvent (2 mL, 1 M). The vial was sealed under argon atmosphere sealed with a screw cap and placed in a pre-heated metal block at 80 °C, and the reaction mixture was stirred at the same temperature for 16 h. After completion of the reaction, the reaction mixture was cooled to room temperature and the crude product was purified on a silica gel (100-200 mesh size) flash column chromatography using EtOAc/ petroleum ether as eluent (10:90 to 30:70 v/v) to obtain the desired product **5aa-d<sub>4</sub>** in 48% yield (28.1 mg). No deuteration incorporation was observed in aliphatic regions.

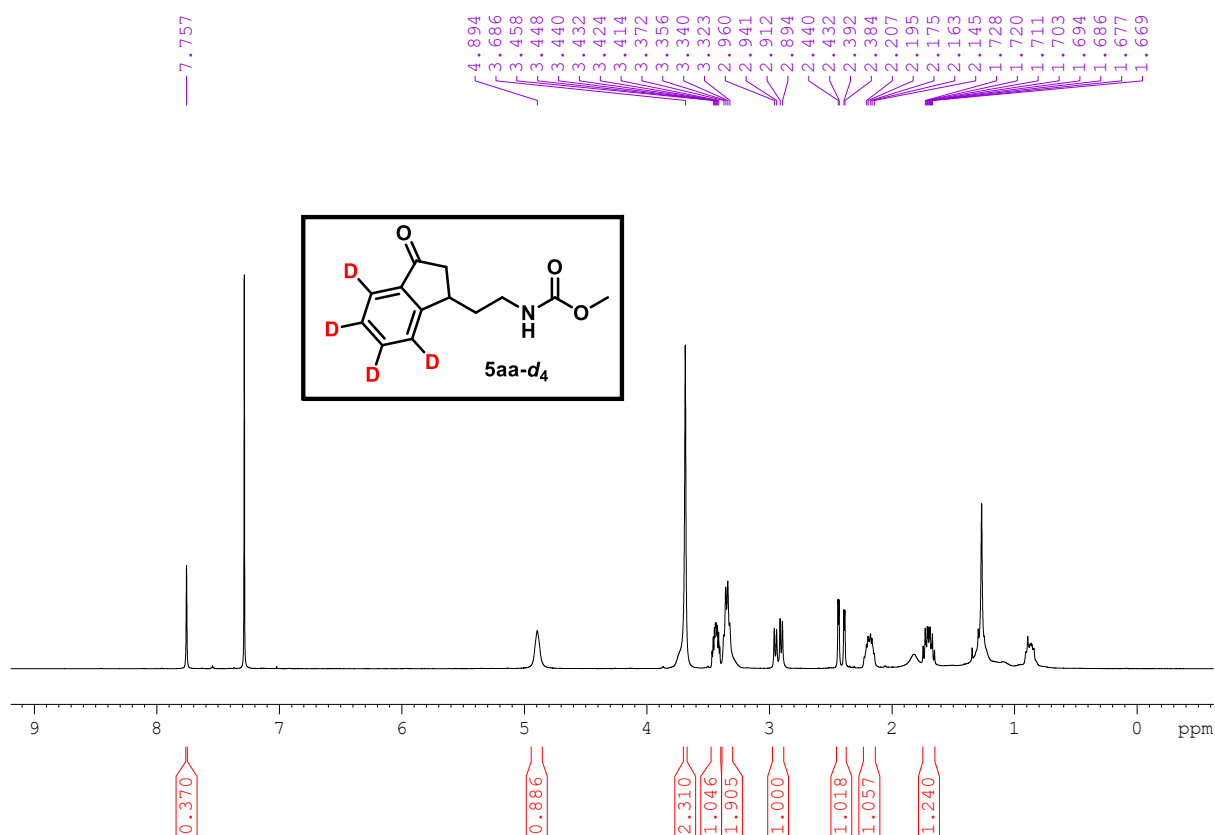

**(g) Control studies.**

Deuterium labeling experiments of sulfoxonium ylide **1a** were conducted to gain insights into the reaction mechanism (Scheme 4). Deuteration of sulfoxonium ylide under both annulation conditions revealed that C-H activation is reversible, and  $\alpha$ -carbon is involved in the metallacycle (Schemes 4a and 4d). The kinetic isotopic effect for both reactions was calculated by parallel reactions of undeuterated sulfoxonium ylide **1a** and pentadeuterated sulfoxonium ylide **1a-d<sub>5</sub>** with allyl carbonate (**2a**) and allyl carbamate (**4a**) under their respective optimal conditions for 1 h. The KIE value of 2.57 was observed for (4+2) annulation, suggesting that the C-H activation step may be the rate-determining in the catalytic cycle, whereas the KIE value of 1.36 was observed for (4+1) annulation, suggesting that the C-H activation step may not be the rate-determining step (Scheme 4b and 4e). The reaction of **1a** with **2a** in the presence of deuterated acetic acid resulted in the formation of the undeuterated product **3aa**, suggesting that the reaction does not involve the regeneration of the catalyst by protodemetalation (Scheme 4c). When the deuterated sulfoxonium ylides **1a-d<sub>5</sub>** were reacted with **4a**, no deuterium incorporation was observed in the aliphatic regions of the product (Scheme 4f).

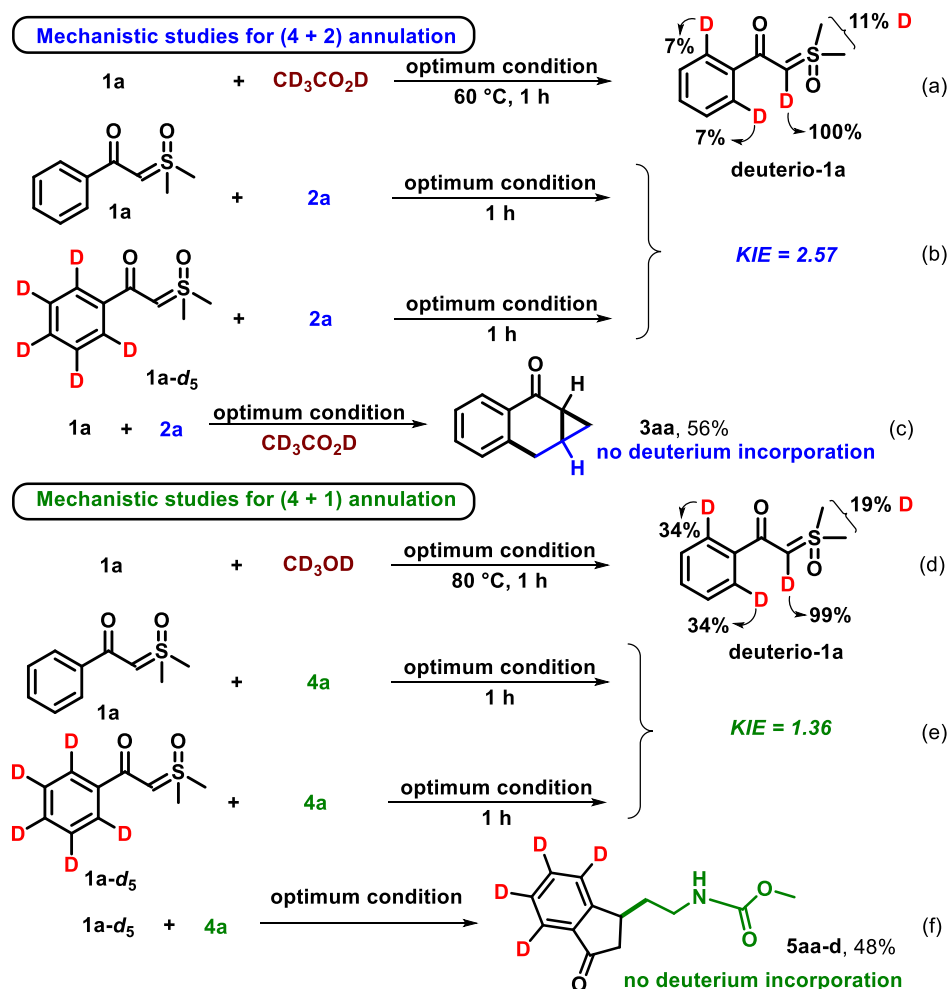

## Characterization Data

### 1,1a,7,7a-Tetrahydro-2H-cyclopropa[b]naphthalen-2-one (3aa).

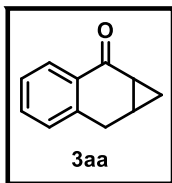

Prepared as shown in *general experimental procedure A*. **Yield** = 73% (42.2 mg); **Appearance** - Yellow Liquid;  $R_f$  = 0.7 (10% EtOAc /Hexane);  $^1\text{H NMR}$  (400 MHz,  $\text{CDCl}_3$ )  $\delta$  7.86 (d,  $J$  = 7.3 Hz, 1H), 7.45 (td,  $J$  = 7.5, 1.1 Hz, 1H), 7.30 (t,  $J$  = 7.5 Hz, 1H), 7.17 (d,  $J$  = 7.6 Hz, 1H), 3.33 (dd,  $J$  = 17.4, 4.9 Hz, 1H), 3.21 (d,  $J$  = 17.4 Hz, 1H), 2.14 (td,  $J$  = 8.2, 4.2 Hz, 1H), 2.02 – 1.89 (m, 1H), 1.32 (td,  $J$  = 8.5, 4.9 Hz, 1H), 0.83 (dd,  $J$  = 10.6, 4.7 Hz, 1H);  $^{13}\text{C}\{^1\text{H}\}$  NMR (100 MHz,  $\text{CDCl}_3$ )  $\delta$  198.4, 138.6, 133.2, 131.3, 129.1, 127.2, 127.1, 28.1, 25.5, 14.1, 13.0; **FT-IR** ( $\text{cm}^{-1}$ ) 2922, 1670, 1601; **HRMS (ESI-TOF) m/z**  $[\text{M} + \text{H}]^+$  Calcd for  $\text{C}_{11}\text{H}_{10}\text{OH}$  159.0810; Found 159.0815.

### 5-Methyl-1,1a,7,7a-tetrahydro-2H-cyclopropa[b]naphthalen-2-one (3ba).

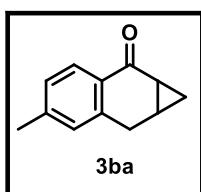

Prepared as shown in *general experimental procedure A*. **Yield** = 70% (42.2 mg); **Appearance** – Pale Yellow Liquid;  $R_f$  = 0.60 (10% EtOAc /Hexane);  $^1\text{H NMR}$  (400 MHz,  $\text{CDCl}_3$ )  $\delta$  7.67 (s, 1H), 7.27 (t,  $J$  = 3.1 Hz, 1H), 7.06 (d,  $J$  = 7.8 Hz, 1H), 3.28 (dd,  $J$  = 17.3, 4.8 Hz, 1H), 3.17 (d,  $J$  = 17.2 Hz, 1H), 2.34 (s, 3H), 2.12 (td,  $J$  = 8.0, 4.3 Hz, 1H), 1.92 (tt,  $J$  = 7.7, 3.8 Hz, 1H), 1.34 – 1.27 (m, 1H), 0.81 (dd,  $J$  = 10.6, 4.6 Hz, 1H);  $^{13}\text{C}\{^1\text{H}\}$  NMR (100 MHz,  $\text{CDCl}_3$ )  $\delta$  198.8, 136.9, 135.7, 134.1, 131.0, 128.9, 127.2, 27.7, 25.5, 21.0, 14.2, 13.0; **FT-IR** ( $\text{cm}^{-1}$ ) 2119, 1671, 1612; **HRMS (ESI-TOF) m/z**  $[\text{M} + \text{H}]^+$  Calcd for  $\text{C}_{12}\text{H}_{12}\text{OH}$  173.0966; Found 173.0966.

### 5-(tert-Butyl)-1,1a,7,7a-tetrahydro-2H-cyclopropa[b]naphthalen-2-one (3ca).

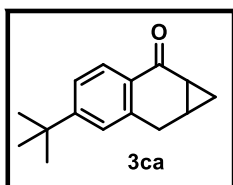

Prepared as shown in *general experimental procedure A*. **Yield** = 55% (42.2 mg); **Appearance** – Yellow Liquid;  $R_f$  = 0.7 (10% EtOAc /Hexane);  $^1\text{H NMR}$  (400 MHz,  $\text{CDCl}_3$ )  $\delta$  7.80 (d,  $J$  = 8.2 Hz, 1H), 7.33 (d,  $J$  = 8.2 Hz, 1H), 7.15 (s, 1H), 3.33 (dd,  $J$  = 17.3, 4.9 Hz, 1H), 3.19 (d,  $J$  = 17.4 Hz, 1H), 2.10 (td,  $J$  = 8.4, 4.3 Hz, 1H), 1.96 – 1.86 (m, 1H), 1.71 (s, 1H), 1.31 (s, 9H), 0.83 (dd,  $J$  = 10.5, 4.7 Hz, 1H);  $^{13}\text{C}\{^1\text{H}\}$  NMR (100 MHz,  $\text{CDCl}_3$ )  $\delta$  198.2, 156.8, 138.5, 128.7, 127.0, 125.7, 124.5, 35.1, 31.2, 28.3, 25.3, 14.1, 13.0. **FT-IR** ( $\text{cm}^{-1}$ ) 2962, 1671, 1606; **HRMS (ESI-TOF) m/z**  $[\text{M} + \text{H}]^+$  Calcd for  $\text{C}_{15}\text{H}_{18}\text{OH}$  215.1436; Found 215.1437.

**5-Bromo-1,1a,7,7a-tetrahydro-2H-cyclopropa[b]naphthalen-2-one (3da).**

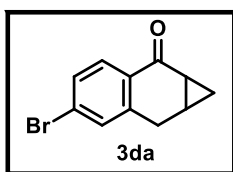

Prepared as shown in *general experimental procedure A*. **Yield** = 61% (42.2 mg); **Appearance** – Yellow Liquid;  $R_f$  = 0.70 (10% EtOAc /Hexane);  $^1\text{H NMR}$  (400 MHz,  $\text{CDCl}_3$ )  $\delta$  7.73 (d,  $J$  = 8.3 Hz, 1H), 7.44 (d,  $J$  = 8.3 Hz, 1H), 7.36 (s, 1H), 3.32 (dd,  $J$  = 17.6, 4.9 Hz, 1H), 3.18 (d,  $J$  = 17.5 Hz, 1H), 2.14 (td,  $J$  = 8.4, 4.3 Hz, 1H), 1.94 (tt,  $J$  = 7.6, 3.8 Hz, 1H), 1.35 (td,  $J$  = 8.5, 5.0 Hz, 1H), 0.82 (dd,  $J$  = 10.6, 4.8 Hz, 1H);  $^{13}\text{C}\{^1\text{H}\}$  NMR (100 MHz,  $\text{CDCl}_3$ )  $\delta$  197.4, 140.4, 131.9, 130.6, 130.1, 128.9, 128.1, 27.8, 25.3, 14.1, 12.9; **FT-IR** ( $\text{cm}^{-1}$ ) 2922, 1671, 1587; **HRMS (ESI-TOF) m/z**  $[\text{M} + \text{H}]^+$  Calcd for  $\text{C}_{11}\text{H}_9\text{BrOH}$  236.9915; Found 236.9915.

**5-Chloro-1,1a,7,7a-tetrahydro-2H-cyclopropa[b]naphthalen-2-one (3ea).**

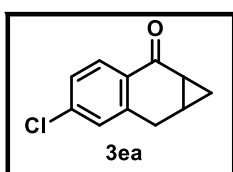

Prepared as shown in *general experimental procedure A*. **Yield** = 55% (42.2 mg); **Appearance** – Yellow Liquid;  $R_f$  = 0.60 (10% EtOAc /Hexane);  $^1\text{H NMR}$  (400 MHz,  $\text{CDCl}_3$ )  $\delta$  7.81 (d,  $J$  = 8.3 Hz, 1H), 7.30 – 7.27 (m, 1H), 7.18 (s, 1H), 3.32 (dd,  $J$  = 17.6, 5.0 Hz, 1H), 3.19 (d,  $J$  = 17.5 Hz, 1H), 2.14 (td,  $J$  = 8.0, 4.3 Hz, 1H), 2.00 – 1.90 (m, 1H), 1.39 – 1.32 (m, 1H), 0.82 (dd,  $J$  = 10.7, 4.8 Hz, 1H);  $^{13}\text{C}\{^1\text{H}\}$  NMR (100 MHz,  $\text{CDCl}_3$ )  $\delta$  197.2, 140.3, 139.4, 129.7, 128.9, 128.8, 127.7, 27.9, 25.3, 14.1, 12.9; **FT-IR** ( $\text{cm}^{-1}$ ) 2923, 1673, 1592; **HRMS (ESI-TOF) m/z**  $[\text{M} + \text{H}]^+$  Calcd for  $\text{C}_{11}\text{H}_9\text{ClOH}$  193.0420; Found 193.0422.

**5-Iodo-1,1a,7,7a-tetrahydro-2H-cyclopropa[b]naphthalen-2-one (3fa).**

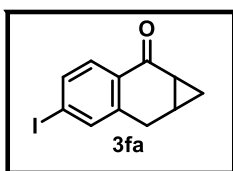

Prepared as shown in *general experimental procedure A*. **Yield** = 69% (39 mg); **Appearance** – Yellow Liquid;  $R_f$  = 0.60 (10% EtOAc /Hexane);  $^1\text{H NMR}$  (400 MHz,  $\text{CDCl}_3$ )  $\delta$  7.66 (d,  $J$  = 8.2 Hz, 1H), 7.63 – 7.47 (m, 2H), 3.30 (dd,  $J$  = 17.6, 5.0 Hz, 1H), 3.16 (d,  $J$  = 17.5 Hz, 1H), 2.14 (td,  $J$  = 8.3, 4.3 Hz, 1H), 2.01 – 1.89 (m, 1H), 1.35 (td,  $J$  = 8.5, 5.0 Hz, 1H), 0.82 (dd,  $J$  = 10.7, 4.8 Hz, 1H);  $^{13}\text{C}$  NMR (101 MHz,  $\text{CDCl}_3$ )  $\delta$  197.7, 140.3, 137.9, 136.5, 130.6, 128.6, 100.9, 27.6, 25.3, 14.1, 12.9; **FT-IR** ( $\text{cm}^{-1}$ ) 2922, 1668, 1581; **HRMS (ESI-TOF) m/z**  $[\text{M} + \text{H}]^+$  Calcd for  $\text{C}_{11}\text{H}_9\text{IOH}$  284.9776; Found 284.9779.

**5-Methoxy-1,1a,7,7a-tetrahydro-2H-cyclopropa[b]naphthalen-2-one (3ga).**

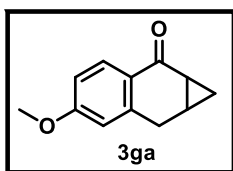

Prepared as shown in *general experimental procedure A*. **Yield** = 42% (42.2 mg); **Appearance** – Yellow Liquid;  $R_f$  = 0.60 (20% EtOAc /Hexane);  $^1\text{H NMR}$  (400 MHz,  $\text{CDCl}_3$ )  $\delta$  7.85 (d,  $J$  = 8.7 Hz, 1H), 6.82 (dd,  $J$  = 8.7, 2.4 Hz, 1H), 6.63 (s, 1H), 3.83 (s, 3H), 3.31 (dd,  $J$  = 17.4, 5.1 Hz, 1H), 3.17 (d,  $J$  = 17.4 Hz, 1H), 2.08 (td,  $J$  = 8.3, 4.3 Hz, 1H), 1.89 (dt,  $J$  = 12.8, 6.4 Hz, 1H), 1.34 – 1.27 (m, 1H), 0.79 (dd,  $J$  = 10.6, 4.6 Hz, 1H);  $^{13}\text{C}\{^1\text{H}\}$  NMR (100 MHz,  $\text{CDCl}_3$ )  $\delta$  197.4, 163.6, 141.0, 129.4, 124.4, 113.3, 113.2, 55.5, 28.4, 24.9, 13.9, 13.1; **FT-IR** ( $\text{cm}^{-1}$ ) 2839, 1662, 1601; **HRMS (ESI-TOF) m/z**  $[\text{M} + \text{H}]^+$  Calcd for  $\text{C}_{12}\text{H}_{12}\text{O}_2\text{H}$  189.0916; Found 189.0919.

**3-Methoxy-1,1a,7,7a-tetrahydro-2H-cyclopropa[b]naphthalen-2-one (3ha).**

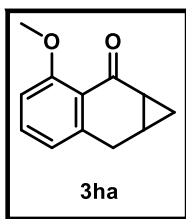

Prepared as shown in *general experimental procedure A*. Yield = 58% (42.2 mg); Appearance – Yellow Liquid;  $R_f = 0.60$  (20% EtOAc /Hexane);  $^1\text{H NMR}$  (400 MHz,  $\text{CDCl}_3$ )  $\delta$  7.34 (t,  $J = 8.0$  Hz, 1H), 6.83 (d,  $J = 8.4$  Hz, 1H), 6.74 (d,  $J = 7.6$  Hz, 1H), 3.86 (s, 3H), 3.28 (dd,  $J = 17.0, 4.4$  Hz, 1H), 3.13 (d,  $J = 16.9$  Hz, 1H), 2.14 (td,  $J = 8.3, 4.3$  Hz, 1H), 1.92 – 1.86 (m, 1H), 1.25 – 1.19 (m, 1H), 0.88 (dd,  $J = 10.6, 4.7$  Hz, 1H);  $^{13}\text{C NMR}$  (101 MHz,  $\text{CDCl}_3$ )  $\delta$  198.4, 158.8, 140.7, 133.2, 121.2, 121.0, 110.4, 56.1, 29.2, 27.8, 14.5, 13.3; FT-IR ( $\text{cm}^{-1}$ ) 2882, 1669, 1265; HRMS (ESI-TOF)  $m/z$   $[\text{M} + \text{Na}]^+$  Calcd for  $\text{C}_{12}\text{H}_{12}\text{O}_2\text{Na}$  189.0916; Found 189.0922.

**4-Methoxy-1,1a,7,7a-tetrahydro-2H-cyclopropa[b]naphthalen-2-one (3ia).**

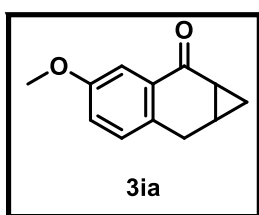

Prepared as shown in *general experimental procedure A*. Yield = 32% (42.2 mg); Appearance – Yellow Liquid;  $R_f = 0.6$  (10% EtOAc /Hexane);  $^1\text{H NMR}$  (400 MHz,  $\text{CDCl}_3$ )  $\delta$  7.36 (d,  $J = 2.7$  Hz, 1H), 7.09 (d,  $J = 8.4$  Hz, 1H), 7.03 (dd,  $J = 8.4, 2.7$  Hz, 1H), 3.82 (s, 3H), 3.26 (dd,  $J = 17.1, 4.9$  Hz, 1H), 3.16 (d,  $J = 17.2$  Hz, 1H), 2.13 (td,  $J = 8.2, 4.3$  Hz, 1H), 1.93 (dt,  $J = 12.6, 6.3$  Hz, 1H), 1.34 – 1.29 (m, 1H), 0.82 (dd,  $J = 10.6, 4.6$  Hz, 1H);  $^{13}\text{C}\{^1\text{H}\}$  NMR (100 MHz,  $\text{CDCl}_3$ )  $\delta$  198.4, 158.8, 132.0, 130.9, 130.2, 121.3, 109.5, 55.6, 27.3, 25.3, 14.3, 13.0; FT-IR ( $\text{cm}^{-1}$ ) 2838, 1668, 1608; HRMS (ESI-TOF)  $m/z$   $[\text{M} + \text{H}]^+$  Calculated for  $\text{C}_{12}\text{H}_{12}\text{O}_2\text{H}$  189.0916; Found 189.0920.

**6-Methoxy-1,1a,7,7a-tetrahydro-2H-cyclopropa[b]naphthalen-2-one (3ia').**

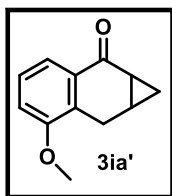

Prepared as shown in *general experimental procedure A*. Yield = 60% (42.2 mg); Appearance – Yellow Liquid;  $R_f = 0.6$  (10% EtOAc /Hexane);  $^1\text{H NMR}$  (400 MHz,  $\text{CDCl}_3$ )  $\delta$  7.49 (d,  $J = 7.8$  Hz, 1H), 7.28 – 7.24 (m, 1H), 7.00 (d,  $J = 8.1$  Hz, 1H), 3.85 (s, 3H), 3.49 (d,  $J = 18.4$  Hz, 1H), 2.89 (dd,  $J = 18.4, 5.4$  Hz, 1H), 2.17 – 2.08 (m, 1H), 2.04 – 1.89 (m, 1H), 1.37 – 1.28 (m, 1H), 0.81 (dd,  $J = 10.6, 4.6$  Hz, 1H);  $^{13}\text{C}\{^1\text{H}\}$  NMR (100 MHz,  $\text{CDCl}_3$ )  $\delta$  198.6, 157.0, 132.1, 127.9, 127.2, 118.9, 114.1, 55.7, 25.3, 21.3, 14.5, 12.9; FT-IR ( $\text{cm}^{-1}$ ) 2930, 1672, 1581; HRMS (ESI-TOF)  $m/z$   $[\text{M} + \text{H}]^+$  Calcd for  $\text{C}_{12}\text{H}_{12}\text{O}_2\text{H}$  189.0916; Found 189.0921.

**3,6-Dimethoxy-1,1a,7,7a-tetrahydro-2H-cyclopropa[b]naphthalen-2-one (3ja).**

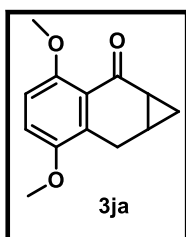

Prepared as shown in *general experimental procedure A*. Yield = 71% (42.2 mg); Appearance – Yellow Liquid;  $R_f = 0.5$  (20% EtOAc /Hexane);  $^1\text{H NMR}$  (400 MHz,  $\text{CDCl}_3$ )  $\delta$  6.92 (d,  $J = 9.0$  Hz, 1H), 6.78 (d,  $J = 9.1$  Hz, 1H), 3.82 (s, 3H), 3.79 (s, 3H), 3.51 (d,  $J = 18.0$  Hz, 1H), 2.82 (dd,  $J = 18.0, 4.8$  Hz, 1H), 2.13 (td,  $J = 8.3, 4.2$  Hz, 1H), 2.02 – 1.83 (m, 1H), 1.21 (td,  $J = 8.1, 5.0$  Hz, 1H), 0.87 (dd,  $J = 10.5, 4.8$  Hz, 1H);  $^{13}\text{C}\{^1\text{H}\}$  NMR (101 MHz,  $\text{CDCl}_3$ )  $\delta$  198.7, 152.7, 150.6, 129.3, 122.3, 114.5, 110.4, 56.6, 56.1, 27.8, 21.9, 15.0, 13.1; FT-IR ( $\text{cm}^{-1}$ ) 2927, 1669, 1134; HRMS (ESI-TOF)  $m/z$   $[\text{M} + \text{Na}]^+$  Calcd for  $\text{C}_{13}\text{H}_{14}\text{O}_3\text{Na}$  241.0841; Found 241.0837.

**4,6-Dimethoxy-1,1a,7,7a-tetrahydro-2H-cyclopropa[b]naphthalen-2-one (3ka).**

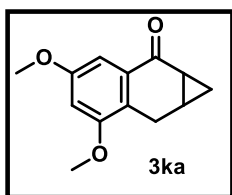

Prepared as shown in *general experimental procedure A*. Yield = 64% (42.2 mg); Appearance – Yellow Liquid;  $R_f$  = 0.60 (20% EtOAc /Hexane);  $^1\text{H NMR}$  (400 MHz,  $\text{CDCl}_3$ )  $\delta$  6.98 (d,  $J$  = 2.4 Hz, 1H), 6.60 (d,  $J$  = 2.4 Hz, 1H), 3.82 (s, 3H), 3.81 (s, 3H), 3.39 (d,  $J$  = 18.2 Hz, 1H), 2.83 (dd,  $J$  = 18.2, 5.5 Hz, 1H), 2.11 (ddd,  $J$  = 6.0, 5.2, 2.6 Hz, 1H), 2.00 – 1.89 (m, 1H), 1.30 (td,  $J$  = 8.8, 4.7 Hz, 1H), 0.79 (dd,  $J$  = 10.5, 4.5 Hz, 1H);  $^{13}\text{C}\{^1\text{H}\}$  NMR (101 MHz,  $\text{CDCl}_3$ )  $\delta$  198.5, 159.2, 158.2, 132.3, 120.9, 103.7, 100.3, 55.7, 55.6, 25.3, 21.0, 14.5, 13.0; FT-IR ( $\text{cm}^{-1}$ ) 2927, 1669, 1608; HRMS (ESI-TOF)  $m/z$   $[\text{M} + \text{H}]^+$  Calcd for  $\text{C}_{13}\text{H}_{14}\text{O}_3$  219.1021; Found 219.1023.

**5-Methoxy-4-methyl-1,1a,7,7a-tetrahydro-2H-cyclopropa[b]naphthalen-2-one (3la).**

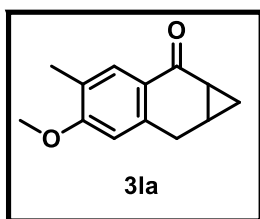

Prepared as shown in *general experimental procedure A*. Yield = 67% (42.2 mg); Appearance – Yellow liquid;  $R_f$  = 0.5 (20%EtOAc /Hexane);  $^1\text{H NMR}$  (400 MHz,  $\text{CDCl}_3$ )  $\delta$  7.67 (s,  $J$  = 8.1 Hz, 1H), 6.53 (s,  $J$  = 8.1 Hz, 1H), 3.85 (s, 3H), 3.30 (dd,  $J$  = 17.4, 5.1 Hz, 1H), 3.15 (d,  $J$  = 17.4 Hz, 1H), 2.18 (s,  $J$  = 8.4, 4.3 Hz, 3H), 2.10 – 2.01 (m, 1H), 1.87 (dt,  $J$  = 12.9, 6.4 Hz 1H), 1.28 (dd,  $J$  = 8.6, 3.8 Hz, 1H), 0.77 (dd,  $J$  = 10.5, 4.6 Hz, 1H);  $^{13}\text{C}\{^1\text{H}\}$  NMR (100 MHz,  $\text{CDCl}_3$ )  $\delta$  197.6, 161.9, 138.7, 129.4, 126.0, 123.6, 109.2, 55.6, 28.2, 24.8, 15.9, 13.8, 13.1; FT-IR ( $\text{cm}^{-1}$ ) 2923, 1658, 1607; HRMS (ESI-TOF)  $m/z$   $[\text{M} + \text{H}]^+$  Calcd for  $\text{C}_{13}\text{H}_{14}\text{O}_2$  203.1072; Found 203.1073.

**7-Oxo-1a,2,7,7a-tetrahydro-1H-cyclopropa[b]naphthalene-4-carbonitrile (3ma).**

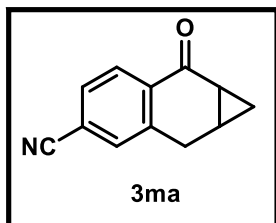

Prepared as shown in *general experimental procedure A*. Yield = 32% (42.2 mg); Appearance – Pale Yellow Liquid;  $R_f$  = 0.4 (10% EtOAc /Hexane);  $^1\text{H NMR}$  (400 MHz,  $\text{CDCl}_3$ )  $\delta$  7.96 (d,  $J$  = 8.0 Hz, 1H), 7.60 (d,  $J$  = 8.0 Hz, 1H), 7.52 (s, 1H), 3.37 (dd,  $J$  = 17.6, 4.8 Hz, 1H), 3.28 (d,  $J$  = 17.6 Hz, 1H), 2.22 (td,  $J$  = 8.3, 4.3 Hz, 1H), 2.10 – 1.97 (m, 1H), 1.42 (ddd,  $J$  = 9.1, 8.1, 5.3 Hz, 1H), 0.84 (dd,  $J$  = 10.7, 5.1 Hz, 1H);  $^{13}\text{C NMR}$  (101 MHz,  $\text{CDCl}_3$ )  $\delta$  196.7, 139.4, 134.5, 132.9, 130.6, 128.0, 118.1, 116.5, 27.9, 25.7, 14.4, 12.9; FT-IR ( $\text{cm}^{-1}$ ) 2926, 2229, 1669; HRMS (ESI-TOF)  $m/z$   $[\text{M} + \text{H}]^+$  Calcd for  $\text{C}_{12}\text{H}_9\text{NO}$  184.0762; Found 184.07766.

**5-(Trifluoromethyl)-1,1a,7,7a-tetrahydro-2H-cyclopropa[b]naphthalen-2-one (3na).**

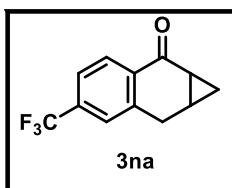

Prepared as shown in *general experimental procedure A*. Yield = 49% (42.2 mg); Appearance – Pale Yellow Liquid;  $R_f$  = 0.60 (10% EtOAc /Hexane);  $^1\text{H NMR}$  (400 MHz,  $\text{CDCl}_3$ )  $\delta$  7.98 (d,  $J$  = 8.1 Hz, 1H), 7.56 (d,  $J$  = 8.1 Hz, 1H), 7.46 (s, 1H), 3.39 (dd,  $J$  = 17.6, 4.7 Hz, 1H), 3.30 (d,  $J$  = 17.5 Hz, 1H), 2.21 (td,  $J$  = 8.4, 4.3 Hz, 1H), 2.08 – 1.95 (m, 1H), 1.44 – 1.36 (m, 1H), 0.85 (dd,  $J$  = 10.7, 4.9 Hz, 1H);  $^{13}\text{C NMR}$  (100 MHz,  $\text{CDCl}_3$ )  $\delta$  197.2, 139.2, 134.6 (q,  $J_{\text{C-F}}$  = 32.6 Hz), 134.0, 127.9, 126.1 (q,  $J_{\text{C-F}}$  = 3.5 Hz), 124.0 (q,  $J_{\text{C-F}}$  =

3.6 Hz), 123.7 (q,  $J_{C-F} = 272.9$  Hz), 28.1, 25.6, 14.4, 12.9;  $^{19}\text{F}$  NMR (377 MHz,  $\text{CDCl}_3$ )  $\delta$  -63.16. FT-IR ( $\text{cm}^{-1}$ ) 2926, 1678, 1329; HRMS (ESI-TOF)  $m/z$   $[\text{M} + \text{H}]^+$  Calcd for  $\text{C}_{12}\text{H}_9\text{F}_3\text{OH}$  227.0684; Found 227.0686.

**4-Methyl-1,1a,7,7a-tetrahydro-2H-cyclopropa[b]naphthalen-2-one (3oa).**

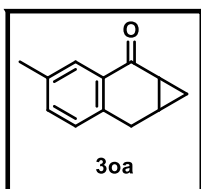

Prepared as shown in *general experimental procedure A*. Yield = 78% (42.2 mg); Appearance – Colourless Liquid;  $R_f = 0.6$  (10% EtOAc /Hexane);  $^1\text{H}$  NMR (400 MHz,  $\text{CDCl}_3$ )  $\delta$  7.67 (s, 1H), 7.26 (d,  $J = 4.5$  Hz, 1H), 7.06 (d,  $J = 7.8$  Hz, 1H), 3.28 (dd,  $J = 17.4, 4.7$  Hz, 1H), 3.17 (d,  $J = 17.2$  Hz, 1H), 2.34 (s, 3H), 2.12 (td,  $J = 8.4, 4.3$  Hz, 1H), 1.93 (dd,  $J = 12.7, 6.3$  Hz, 1H), 1.34 – 1.28 (m, 1H), 0.81 (dd,  $J = 10.6, 4.6$  Hz, 1H).  $^{13}\text{C}\{^1\text{H}\}$  NMR (101 MHz,  $\text{CDCl}_3$ )  $\delta$  198.8, 136.9, 135.7, 134.1, 131.0, 128.9, 127.2, 27.7, 25.5, 21.0, 14.2, 13.0; FT-IR ( $\text{cm}^{-1}$ ) 2921, 1671, 1611; HRMS (ESI-TOF)  $m/z$   $[\text{M} + \text{H}]^+$  Calcd for  $\text{C}_{12}\text{H}_{12}\text{OH}$  173.0966; Found 173.0965.

**4-(Trifluoromethyl)-1,1a,7,7a-tetrahydro-2H-cyclopropa[b]naphthalen-2-one (3pa).**

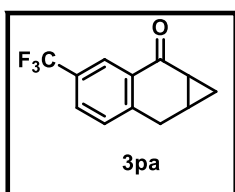

Prepared as shown in *general experimental procedure A*. Yield = 40% (42.2 mg); Appearance – Pale Yellow Liquid;  $R_f = 0.7$  (10% EtOAc /Hexane);  $^1\text{H}$  NMR (400 MHz,  $\text{CDCl}_3$ )  $\delta$  8.16 (s, 1H), 7.69 (dd,  $J = 8.0, 1.3$  Hz, 1H), 7.32 (d,  $J = 8.0$  Hz, 1H), 3.38 (dd,  $J = 18.0, 4.6$  Hz, 1H), 3.30 (d,  $J = 17.7$  Hz, 1H), 2.20 (td,  $J = 8.3, 4.3$  Hz, 1H), 2.05 – 1.95 (m, 1H), 1.45 – 1.35 (m, 1H), 0.84 (dd,  $J = 10.7, 5.0$  Hz, 1H);  $^{13}\text{C}\{^1\text{H}\}$  NMR (101 MHz,  $\text{CDCl}_3$ )  $\delta$  196.9, 142.3, 131.6, 130.1, 129.8, 129.4 (dd,  $J_{C-H} = 3.3$  Hz), 124.4 (q,  $J_{C-H} = 3.8$  Hz), 123.9 (q,  $J_{C-H} = 272.2$  Hz), 28.1, 25.4, 14.3, 12.9;  $^{19}\text{F}$  NMR (377 MHz,  $\text{CDCl}_3$ )  $\delta$  -62.74; FT-IR ( $\text{cm}^{-1}$ ) 2926, 1676, 1616; HRMS (ESI-TOF)  $m/z$   $[\text{M} + \text{H}]^+$  Calcd for  $\text{C}_{12}\text{H}_9\text{F}_3\text{OH}$  227.0684; Found 227.0686.

**Methyl (2-(3-oxo-2,3-dihydro-1H-inden-1-yl)ethyl)carbamate (5aa)**

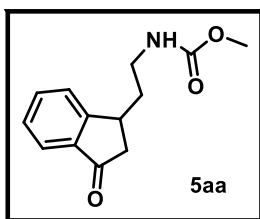

Prepared as shown in *general experimental procedure B*. **Yield** = 71% (66.1mg); **Appearance** – Yellow Oil;  $R_f$  = 0.40 (40% EtOAc /Hexane);  $^1\text{H NMR}$  (400 MHz,  $\text{CDCl}_3$ )  $\delta$  7.67 (d,  $J$  = 7.6 Hz, 1H), 7.54 (t,  $J$  = 7.4 Hz, 1H), 7.46 (d,  $J$  = 7.5 Hz, 1H), 7.32 (t,  $J$  = 7.4 Hz, 1H), 4.83 (s, 1H), 3.60 (s, 3H), 3.32 (ddd,  $J$  = 30.2, 16.9, 5.1 Hz, 3H), 2.84 (dd,  $J$  = 19.0, 7.5 Hz, 1H), 2.33 (dd,  $J$  = 19.0, 3.3 Hz, 1H), 2.10 (dd,  $J$  = 12.9, 4.8 Hz, 1H), 1.61 (ddt,  $J$  = 13.5, 9.9, 6.7 Hz, 1H);  $^{13}\text{C}\{^1\text{H}\}$  NMR (100 MHz,  $\text{CDCl}_3$ )  $\delta$  205.6, 157.8, 157.0, 136.6, 134.8, 127.7, 125.5, 123.6, 52.0, 42.9, 39.5, 36.4, 35.7; **FT-IR** ( $\text{cm}^{-1}$ ) 3342, 2947, 1710, 1534, 1023, 763; **HRMS (ESI-TOF) m/z**  $[\text{M} + \text{Na}]^+$  Calcd for  $\text{C}_{13}\text{H}_{15}\text{NO}_3\text{Na}$  256.0950; Found 256.0950.

**Methyl (2-(6-methyl-3-oxo-2,3-dihydro-1H-inden-1-yl)ethyl)carbamate (5ba)**

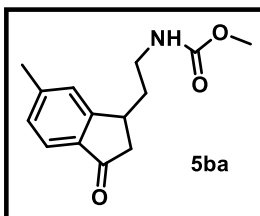

Prepared as shown in *general experimental procedure B*. **Yield** = 68% (67.1 mg); **Appearance** – Yellow Oil;  $R_f$  = 0.45 (40% EtOAc /Hexane);  $^1\text{H NMR}$  (400 MHz,  $\text{CDCl}_3$ )  $\delta$  7.69 (d,  $J$  = 8.5 Hz, 1H), 7.02 – 6.88 (m, 2H), 4.89 (s, 1H), 3.91 (s, 3H), 3.70 (s, 3H), 3.35 (d,  $J$  = 6.6 Hz, 3H), 2.90 (dd,  $J$  = 18.7, 7.5 Hz, 1H), 2.39 (dd,  $J$  = 18.8, 3.2 Hz, 1H), 2.18 (d,  $J$  = 7.6 Hz, 1H), 1.69 (ddt,  $J$  = 13.5, 10.0, 6.7 Hz, 1H);  $^{13}\text{C}\{^1\text{H}\}$  NMR (100 MHz,  $\text{CDCl}_3$ )  $\delta$  205.8, 157.0, 155.2, 137.7, 136.7, 136.0, 125.1, 123.5, 52.0, 43.2, 39.5, 36.5, 35.3, 21.0; **FT-IR** ( $\text{cm}^{-1}$ ) 2922, 2853, 2363, 1701, 1614, 1533, 1252, 1022; **HRMS (ESI-TOF) m/z**  $[\text{M} + \text{Na}]$  Calcd for  $\text{C}_{14}\text{H}_{17}\text{NO}_3\text{Na}$  270.1106; Found 270.1106.

**Methyl (2-(6-(tert-butyl)-3-oxo-2,3-dihydro-1H-inden-1-yl)ethyl)carbamate (5ca)**

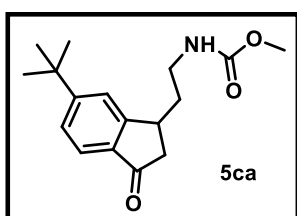

Prepared as shown in *general experimental procedure B*. **Yield** = 65% (75.1 mg); **Appearance** – Yellow Oil;  $R_f$  = 0.40 (20% EtOAc /Hexane);  $^1\text{H NMR}$  (400 MHz,  $\text{CDCl}_3$ )  $\delta$  7.59 (d,  $J$  = 8.1 Hz, 1H), 7.43 (s, 1H), 7.36 (d,  $J$  = 8.1 Hz, 1H), 4.99 (s, 1H), 3.59 (s, 3H), 3.35 – 3.20 (m, 3H), 2.81 (dd,  $J$  = 18.9, 7.4 Hz, 1H), 2.31 (dd,  $J$  = 18.9, 3.1 Hz, 1H), 2.19 – 2.01 (m, 1H), 1.59 (dd,  $J$  = 17.3, 13.5, 6.7 Hz, 1H), 1.28 (s, 9H);  $^{13}\text{C}\{^1\text{H}\}$  NMR (100 MHz,  $\text{CDCl}_3$ )  $\delta$  203.9, 165.3, 160.9, 157.1, 129.8, 125.2, 115.5, 108.7, 55.6, 52.0, 43.0, 39.4, 36.3, 35.6; **FT-IR** ( $\text{cm}^{-1}$ ) 3342, 2961, 1699, 1533, 1255, 756; **HRMS (ESI-TOF) m/z**  $[\text{M} + \text{Na}]^+$  Calcd for  $\text{C}_{17}\text{H}_{23}\text{NO}_3\text{Na}$  312.1576; Found 312.1574.

**Methyl (2-(6-methoxy-3-oxo-2,3-dihydro-1H-inden-1-yl)ethyl)carbamate (5da)**

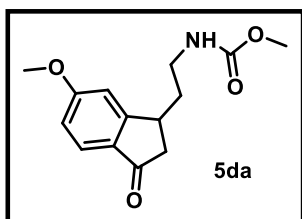

Prepared as shown in *general experimental procedure B*. **Yield** = 67% (70.0 mg); **Appearance** – Yellow Oil;  $R_f$  = 0.40 (40% EtOAc /Hexane);  $^1\text{H NMR}$  (400 MHz,  $\text{CDCl}_3$ )  $\delta$  7.66 (d,  $J$  = 8.5 Hz, 1H), 6.91 (dd,  $J$  = 14.2, 5.7 Hz, 2H), 5.03 (s, 1H), 3.90 (d,  $J$  = 6.8 Hz, 3H), 3.67 (s, 3H), 3.39 – 3.26 (m, 3H), 2.87 (dd,  $J$  = 18.8, 7.5 Hz, 1H), 2.37 (dd,  $J$  = 18.8, 3.3 Hz, 1H), 2.22 – 2.08 (m, 1H), 1.66 (ddt,  $J$  = 13.4, 10.1, 6.7 Hz, 1H);  $^{13}\text{C}\{^1\text{H}\}$  NMR (100 MHz,  $\text{CDCl}_3$ )  $\delta$  203.9, 165.3, 160.9,



157.1, 129.8, 125.2, 115.5, 108.7, 55.6, 52.5, 43.0, 39.4, 36.3, 35.6; **FT-IR** ( $\text{cm}^{-1}$ ) 3338, 2943, 1698, 1599, 1193; **HRMS (ESI-TOF) m/z**  $[\text{M} + \text{Na}]^+$  Calcd for  $\text{C}_{14}\text{H}_{17}\text{NO}_4\text{Na}$  286.1055; Found 286.1053.

**Methyl (2-(6-cyano-3-oxo-2,3-dihydro-1H-inden-1-yl)ethyl)carbamate (5ea).**

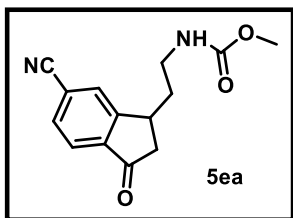

Prepared as shown in *general experimental procedure B*. **Yield** = 46% (47.4 mg); **Appearance** – Yellow Oil;  $R_f$  = 0.35 (40% EtOAc /Hexane);  **$^1\text{H}$  NMR (400 MHz,  $\text{CDCl}_3$ )**  $\delta$  7.91 – 7.79 (m, 2H), 7.68 (d,  $J$  = 7.9 Hz, 1H), 4.88 (s, 1H), 3.68 (s, 3H), 3.49 (dd,  $J$  = 10.1, 7.4 Hz, 2H), 3.35 (d,  $J$  = 6.3 Hz, 1H), 3.00 (dd,  $J$  = 19.3, 7.6 Hz, 1H), 2.49 (dd,  $J$  = 19.3, 3.2

Hz, 1H), 1.81 – 1.59 (m, 2H);  **$^{13}\text{C}\{^1\text{H}\}$  NMR (100 MHz,  $\text{CDCl}_3$ )**  $\delta$  203.9, 157.7, 157.1, 139.5, 131.4, 129.8, 124.4, 117.9, 117.8, 76.6, 52.2, 42.8, 39.2, 36.4, 35.7; **FT-IR** ( $\text{cm}^{-1}$ ) 3351, 1718, 1531, 1255, 1192, 1037; **HRMS (ESI-TOF) m/z**  $[\text{M} + \text{Na}]^+$  Calcd for  $\text{C}_{14}\text{H}_{14}\text{N}_2\text{O}_3\text{Na}$  281.0902; Found 281.0900.

**Methyl (2-(3-oxo-6-(trifluoromethyl)-2,3-dihydro-1H-inden-1-yl)ethyl)carbamate (5fa).**

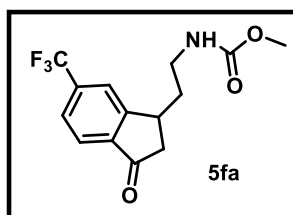

Prepared as shown in *general experimental procedure B*. **Yield** = 48% (57.4mg); **Appearance** – Yellow Oil;  $R_f$  = 0.50 (40% EtOAc /Hexane);  **$^1\text{H}$  NMR (400 MHz,  $\text{CDCl}_3$ )**  $\delta$  7.89 – 7.78 (m, 2H), 7.66 (d,  $J$  = 7.9 Hz, 1H), 4.87 (s, 1H), 3.68 (s, 3H), 3.49 (d,  $J$  = 3.2 Hz, 1H), 3.35 (s, 2H), 3.00 (dd,  $J$  = 19.2, 7.5 Hz, 1H), 2.49 (dd,  $J$  = 19.2, 3.3 Hz, 1H), 2.31 – 2.15 (m, 1H), 1.79

– 1.63 (m, 2H);  **$^{13}\text{C}$  NMR (101 MHz,  $\text{CDCl}_3$ )**  $\delta$  204.5, 158.0, 157.2, 139.2, 136.3, 136.0, 124.9, 124.3, 122.7, 52.2, 43.0, 39.4, 36.5, 35.8;  **$^{19}\text{F}$  NMR (377 MHz,  $\text{CDCl}_3$ )**  $\delta$  -62.78; **FT-IR** ( $\text{cm}^{-1}$ ) 3346, 1718, 1534, 1329, 1272, 1061; **HRMS (ESI-TOF) m/z**  $[\text{M} + \text{Na}]^+$  Calcd for  $\text{C}_{14}\text{H}_{14}\text{F}_3\text{NO}_3\text{Na}$  324.0823; Found 324.0824.

**Methyl (2-(6-bromo-3-oxo-2,3-dihydro-1H-inden-1-yl)ethyl)carbamate (5ga).**

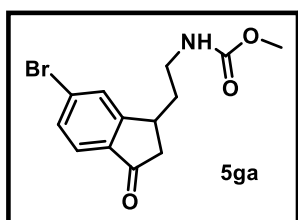

Prepared as shown in *general experimental procedure B*. **Yield** = 53% (65.9mg); **Appearance** – Yellow Oil;  $R_f$  = 0.50 (40% EtOAc /Hexane);  **$^1\text{H}$  NMR (400 MHz,  $\text{CDCl}_3$ )**  $\delta$  7.70 (s, 1H), 7.58 (d,  $J$  = 8.1 Hz, 1H), 7.51 (d,  $J$  = 8.1 Hz, 1H), 5.07 (s, 1H), 3.66 (s, 3H), 3.41 (ddd,  $J$  = 14.1, 7.5, 3.6 Hz, 1H), 3.32 (dd,  $J$  = 13.2, 6.5 Hz, 2H), 2.90 (dd,  $J$  = 19.1, 7.5 Hz, 1H), 2.39 (dd,  $J$  =

19.1, 3.3 Hz 1H), 2.22 – 2.10 (m, 1H), 1.66 (ddt,  $J$  = 13.4, 10.4, 6.5 Hz, 1H);  **$^{13}\text{C}\{^1\text{H}\}$  NMR (101 MHz,  $\text{CDCl}_3$ )**  $\delta$  204.3, 159.5, 157.0, 135.3, 131.3, 130.1, 128.8, 124.8, 52.0, 42.7, 39.3, 36.2, 35.5; **FT-IR** ( $\text{cm}^{-1}$ ) 3337, 2922, 2363, 1716, 1594, 1533, 1443, 1264, 1026; **HRMS (ESI-TOF) m/z**  $[\text{M} + \text{Na}]^+$  Calcd for  $\text{C}_{13}\text{H}_{14}\text{BrNO}_3\text{Na}$  334.0055; Found 334.0053.

**Methyl (2-(6-iodo-3-oxo-2,3-dihydro-1H-inden-1-yl)ethyl)carbamate (5ha).**

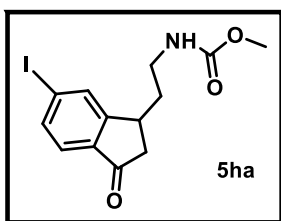

Prepared as shown in *general experimental procedure B*. **Yield** = 40% (57.2mg); **Appearance** – Yellow Oil; **R<sub>f</sub>** = 0.4 (40% EtOAc /Hexane); **<sup>1</sup>H NMR (400 MHz, CDCl<sub>3</sub>)** δ 7.93 (s, 1H), 7.73 (d, *J* = 8.0 Hz, 1H), 7.43 (d, *J* = 8.0 Hz, 1H), 5.08 (s, 1H), 3.67 (s, 3H), 3.39 (dd, *J* = 10.1, 7.3 Hz, 1H), 3.32 (d, *J* = 6.2 Hz, 2H), 2.87 (dd, *J* = 19.1, 7.5 Hz, 1H), 2.37 (dd, *J* = 19.1, 3.1 Hz, 1H), 2.16 (d, *J* = 7.6 Hz, 1H), 1.66 (ddd, *J* = 16.8, 13.3, 6.5 Hz, 1H); **<sup>13</sup>C{<sup>1</sup>H} NMR (101 MHz, CDCl<sub>3</sub>)** δ 204.6, 159.8, 157.0, 137.0, 135.8, 135.0, 124.7, 103.2, 52.0, 42.5, 39.3, 36.2, 35.4; **FT-IR (cm<sup>-1</sup>)** 3335, 2922, 2363, 2331, 1710, 1588, 1533, 1263, 1193, 1023; **HRMS (ESI-TOF) m/z [M + Na]<sup>+</sup>** Calcd for C<sub>13</sub>H<sub>14</sub>NO<sub>3</sub>INa 381.9916; Found 381.9913.

**Methyl (2-(4-chloro-3-oxo-2,3-dihydro-1H-inden-1-yl)ethyl)carbamate (5ia).**

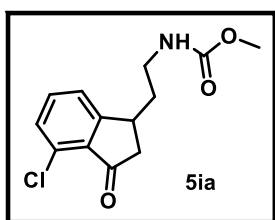

Prepared as shown in *general experimental procedure B*. **Yield** = 58% (61.9 mg); **Appearance** – Yellow Oil; **R<sub>f</sub>** = 0.40 (40% EtOAc /Hexane); **<sup>1</sup>H NMR (400 MHz, CDCl<sub>3</sub>)** δ 7.51 (t, *J* = 7.7 Hz, 1H), 7.43 (d, *J* = 7.5 Hz, 1H), 7.33 (d, *J* = 7.7 Hz, 1H), 4.86 (s, 1H), 3.68 (s, 3H), 3.42 – 3.24 (m, 3H), 2.95 (dd, *J* = 18.9, 7.7 Hz, 1H), 2.45 (dd, *J* = 18.9, 3.5 Hz, 1H), 2.23 – 2.07 (m, 1H), 1.67 (m, *J* = 13.5, 10.1, 6.7 Hz, 1H); **<sup>13</sup>C{<sup>1</sup>H} NMR (100 MHz, CDCl<sub>3</sub>)** δ 202.4, 160.2, 157.0, 135.1, 132.4, 131.8, 129.4, 123.9, 52.1, 43.5, 39.3, 36.5, 34.9; **FT-IR (cm<sup>-1</sup>)** 3342, 1715, 1591, 1458, 1235, 1136, 1025; **HRMS (ESI-TOF) m/z [M + Na]** Calcd for C<sub>13</sub>H<sub>14</sub>ClNO<sub>3</sub>Na 290.0560; Found 290.0560.

**Methyl (2-(5-methyl-3-oxo-2,3-dihydro-1H-inden-1-yl)ethyl)carbamate(5ja).**

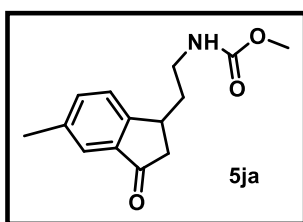

Prepared as shown in *general experimental procedure B*. **Yield** = 72% (71.1 mg); **Appearance** – Yellow Oil; **R<sub>f</sub>** = 0.60 (40% EtOAc /Hexane); **<sup>1</sup>H NMR (400 MHz, CDCl<sub>3</sub>)** δ 7.55 (s, 1H), 7.44 (q, *J* = 8.2 Hz, 2H), 4.91 (s, 1H), 3.69 (s, 3H), 3.35 (dd, *J* = 15.2, 8.5 Hz, 3H), 2.91 (dd, *J* = 18.9, 7.3 Hz, 1H), 2.39 (d, *J* = 19.2 Hz, 4H), 2.20 – 2.09 (m, 1H), 1.68 (tt, *J* = 16.8, 6.9 Hz, 1H). **<sup>13</sup>C{<sup>1</sup>H} NMR (100 MHz, CDCl<sub>3</sub>)** δ 205.8, 157.0, 155.2, 137.7, 136.7, 136.0, 125.1, 123.5, 77.3, 77.2, 77.0, 76.6, 52.0, 43.2, 39.5, 36.5, 35.3, 21.0; **FT-IR (cm<sup>-1</sup>)** 2961, 2872, 1714, 1622, 1266, 1006; **HRMS (ESI-TOF) m/z [M + Na]** Calcd for C<sub>14</sub>H<sub>17</sub>NO<sub>3</sub>Na 270.1106; Found 270.1103.

**Methyl (2-(3-oxo-5-(trifluoromethyl)-2,3-dihydro-1H-inden-1-yl)ethyl)carbamate (5ka).**

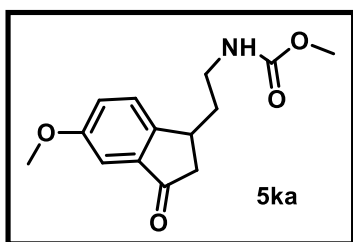

Prepared as shown in *general experimental procedure B*. **Yield** = 68% (71.5 mg); **Appearance** – Yellow Oil; **R<sub>f</sub>** = 0.40 (40% EtOAc /Hexane); **<sup>1</sup>H NMR (400 MHz, CDCl<sub>3</sub>)** δ 7.39 –7.32 (m, 2H), 7.06 (dd, *J* = 6.9, 1.4 Hz, 1H), 4.79 (s, 1H), 3.91 (s, 3H), 3.66 (s, 3H), 3.50 (s, 1H), 3.25 (d, *J* = 40.3 Hz, 2H), 2.86 (dd, *J* = 19.1, 7.5 Hz, 1H), 2.44 (d, *J* = 18.9 Hz, 1H), 2.28 (s, 1H), 1.62 (dt, *J* = 13.7, 7.9 Hz, 1H); **<sup>13</sup>C{<sup>1</sup>H} NMR (100 MHz, CDCl<sub>3</sub>)** δ 205.9, 157.1, 156.9, 145.8, 138.3, 129.3, 115.4, 115.4, 77.3, 55.5, 55.4, 52.0, 43.1, 39.5, 34.6, 33.8; **FT-IR (cm<sup>-1</sup>)** 3341, 1710, 1599, 1265, , 1063, 1035; **HRMS (ESI-TOF) m/z [M + Na]<sup>+</sup>** Calcd for C<sub>14</sub>H<sub>17</sub>NO<sub>4</sub>Na 286.1055; Found 286.1053.

**Methyl (2-(3-oxo-5-(trifluoromethyl)-2,3-dihydro-1H-inden-1-yl)ethyl)carbamate (5la).**

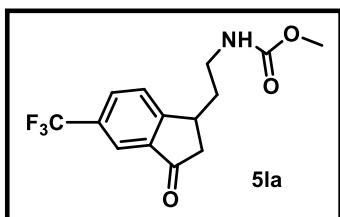

Prepared as shown in *general experimental procedure B*. **Yield** = 43% (51.7 mg); **Appearance** – Yellow Oil; **R<sub>f</sub>** = 0.40 (40% EtOAc /Hexane); **<sup>1</sup>H NMR (400 MHz, CDCl<sub>3</sub>)** δ 8.00 (s, 1H), 7.86 (d, *J* = 7.9 Hz, 1H), 7.70 (d, *J* = 7.9 Hz, 1H), 5.07 (s, 1H), 3.67 (s, 3H), 3.51 (s, 1H), 3.36 (d, *J* = 6.3 Hz, 2H), 2.99 (dd, *J* = 19.2, 7.6 Hz, 1H), 2.49 (dd, *J* = 19.2, 3.2 Hz, 1H), 2.21 (dt, *J* = 11.9, 7.4 Hz, 1H), 1.81 – 1.64 (m, 1H); **<sup>13</sup>C{<sup>1</sup>H} NMR (100 MHz, CDCl<sub>3</sub>)** δ 204.23, 161.0, 157.1, 137.0, 131.3, 131.2, 126.3, 120.9, 120.88, 52.1, 42.9, 39.3, 36.2, 35.8; **<sup>19</sup>F NMR (377 MHz, CDCl<sub>3</sub>)** δ -62.78; **FT-IR (cm<sup>-1</sup>)** 3349, 1712, 1534, 1262, 1167, 1024; **HRMS (ESI-TOF) m/z [M + Na]<sup>+</sup>** Calcd for C<sub>14</sub>H<sub>14</sub>F<sub>3</sub>NO<sub>3</sub>Na 324.0823; Found 324.0820.

**Ethyl (2-(3-oxo-2,3-dihydro-1H-inden-1-yl)ethyl)carbamate (5ab).**

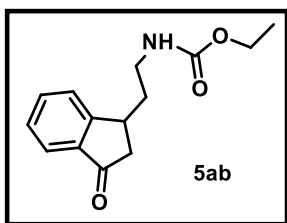

Prepared as shown in *general experimental procedure B*. **Yield** = 69% (68.2mg); **Appearance** – Yellowish Oil; **R<sub>f</sub>** = 0.45(40% EtOAc /Hexane); **<sup>1</sup>H NMR (400 MHz, CDCl<sub>3</sub>)** δ 7.67 (d, *J* = 7.6 Hz, 1H), 7.55 (t, *J* = 7.4 Hz, 1H), 7.46 (d, *J* = 7.6 Hz, 1H), 7.32 (t, *J* = 7.4 Hz, 1H), 4.76 (s, 1H), 4.05 (dd, *J* = 13.9, 6.9 Hz, 2H), 3.39 – 3.17 (m, 3H), 2.84 (dd, *J* = 19.0, 7.5 Hz, 1H), 2.33 (dd, *J* = 19.0, 3.3 Hz, 1H), 2.10 (dd, *J* = 13.0, 4.7 Hz, 1H), 1.61 (ddt, *J* = 13.6, 10.1, 6.8 Hz, 1H), 1.17 (t, *J* = 6.9 Hz, 3H); **<sup>13</sup>C{<sup>1</sup>H} NMR (101 MHz, CDCl<sub>3</sub>)** δ 205.7, 157., 156.6, 136.6, 134.8, 127.7, 125.5, 123.6, 60.8, 42.9, 39.4, 36.4, 35.7, 14.6; **FT-IR (cm<sup>-1</sup>)** 3349, 1711, 1603, 1255,1041; **HRMS (ESI-TOF) m/z [M + Na]<sup>+</sup>** Calcd for C<sub>14</sub>H<sub>17</sub>NO<sub>3</sub>Na 270.1106; Found 270.1104.

**Benzyl (2-(3-oxo-2,3-dihydro-1H-inden-1-yl)ethyl)carbamate (5ac).**

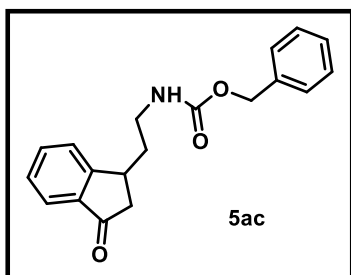

Prepared as shown in *general experimental procedure B*. **Yield** = 66% (50.3 mg); **Appearance** – Colourless Oil;  $R_f$  = 0.50 (40% EtOAc /Hexane);  $^1\text{H NMR}$  (400 MHz,  $\text{CDCl}_3$ )  $\delta$  7.75 (d,  $J$  = 7.6 Hz, 1H), 7.62 (t,  $J$  = 7.2 Hz, 1H), 7.54 (d,  $J$  = 7.4 Hz, 1H), 7.44 – 7.30 (m, 6H), 5.12 (s, 3H), 3.37 (dd,  $J$  = 16.4, 9.4 Hz, 3H), 2.91 (dd,  $J$  = 19.0, 7.3 Hz, 1H), 2.40 (d,  $J$  = 19.1 Hz, 1H), 2.18 (d,  $J$  = 7.5 Hz, 1H). 1.76 – 1.59 (m, 1H);

$^{13}\text{C}\{^1\text{H}\}$  NMR (100 MHz,  $\text{CDCl}_3$ )  $\delta$  205.6, 157.8, 156.3, 136.5, 136.3, 134.7, 128.4, 128.0, 127.9, 127.6, 125.4, 123.5, 66.6, 42.8, 39.4, 36.3, 35.6; **FT-IR** ( $\text{cm}^{-1}$ ) 3339, 2931, 1710, 1250, 1015, 769; **HRMS (ESI-TOF) m/z**  $[\text{M} + \text{Na}]^+$  Calcd for  $\text{C}_{19}\text{H}_{19}\text{NO}_3\text{Na}$  332.1263; Found 332.1262.

**Phenyl (2-(3-oxo-2,3-dihydro-1H-inden-1-yl)ethyl)carbamate (5ad).**

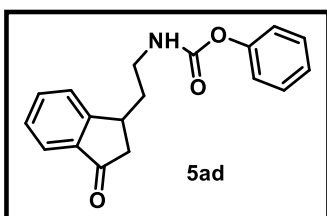

Prepared as shown in *general experimental procedure B*. **Yield** = 62% (52.1 mg); **Appearance** – Colourless Oil;  $R_f$  = 0.5 (40% EtOAc /Hexane);  $^1\text{H NMR}$  (400 MHz,  $\text{CDCl}_3$ )  $\delta$  7.78 (d,  $J$  = 7.6 Hz, 1H), 7.65 (t,  $J$  = 7.4 Hz, 1H), 7.58 (d,  $J$  = 7.7 Hz, 1H), 7.41 (dt,  $J$  = 15.7, 7.6 Hz, 3H), 7.23 (t,  $J$  = 7.4 Hz, 1H), 7.14 (d,  $J$  = 7.9 Hz, 2H), 5.20 (s, 1H), 3.55 – 3.38 (m, 3H),

2.97 (dd,  $J$  = 19.0, 7.6 Hz, 1H), 2.45 (dd,  $J$  = 19.0, 3.3 Hz, 1H), 2.28 (ddd,  $J$  = 20.8, 7.6, 4.4 Hz, 1H), 1.79 (ddd,  $J$  = 16.8, 13.7, 7.0 Hz, 1H);  $^{13}\text{C}\{^1\text{H}\}$  NMR (100 MHz,  $\text{CDCl}_3$ )  $\delta$  205.6, 157.7, 154.7, 150.8, 136.6, 134.9, 129.3, 127.8, 125.5, 125.4, 123.7, 121.5, 42.9, 39.7, 36.2, 35.7; **FT-IR** ( $\text{cm}^{-1}$ ) 3331, 2931, 1712, 1490, 1206, 761; **HRMS (ESI-TOF) m/z**  $[\text{M} + \text{H}]^+$  Calcd for  $\text{C}_{15}\text{H}_{15}\text{NO}_3\text{H}$  318.1106; Found 318.1103.

**4-Methyl-N-(2-(3-oxo-2,3-dihydro-1H-inden-1-yl)ethyl)benzenesulfonamide (5ae).**

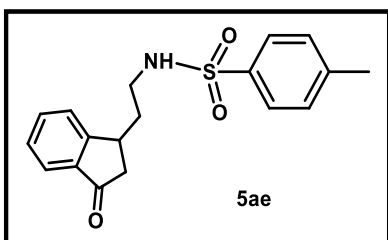

Prepared as shown in *general experimental procedure B*. **Yield** = 47% (31.1 mg); **Appearance** – Yellow Oil;  $R_f$  = 0.35 (40% EtOAc /Hexane);  $^1\text{H NMR}$  (400 MHz,  $\text{CDCl}_3$ )  $\delta$  7.79 (d,  $J$  = 7.8 Hz, 2H), 7.71 (d,  $J$  = 7.6 Hz, 1H), 7.58 (dd,  $J$  = 10.5, 4.4 Hz, 1H), 7.45 – 7.34 (m, 2H), 7.34 – 7.28 (m, 2H), 5.43 (d,  $J$  = 6.0 Hz, 1H), 3.43 (s, 1H),

3.15 – 2.98 (m, 2H), 2.81 (ddd,  $J$  = 19.0, 7.5, 1.0 Hz, 1H), 2.43 (s, 3H), 2.26 (dd,  $J$  = 19.0, 2.3 Hz, 1H), 2.14 (dt,  $J$  = 12.1, 7.5 Hz, 1H), 1.68 – 1.57 (m, 1H);  $^{13}\text{C}\{^1\text{H}\}$  NMR (100 MHz,  $\text{CDCl}_3$ )  $\delta$  205.6, 157.6, 143.5, 136.6, 136.4, 134.8, 129.7, 127.7, 127.0, 125.5, 123.5, 42.6, 41.5, 35.9, 35.2, 21.4; **FT-IR** ( $\text{cm}^{-1}$ ) 3273, 2926, 1706, 1326, 1157, 762; **HRMS (ESI-TOF) m/z**  $[\text{M} + \text{H}]^+$  Calcd for  $\text{C}_{15}\text{H}_{15}\text{NO}_3\text{H}$  330.1164; Found 330.1163.

# $^1\text{H}$ and $^{13}\text{C}$ NMR Spectra

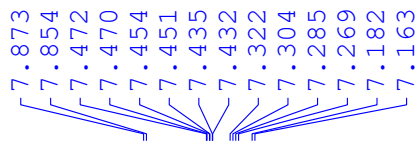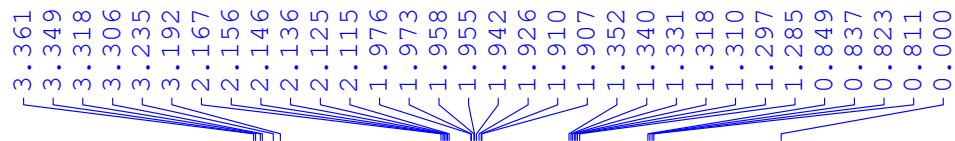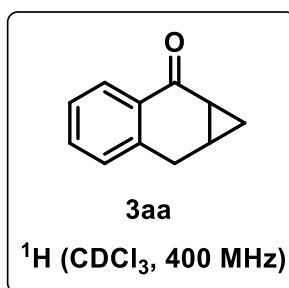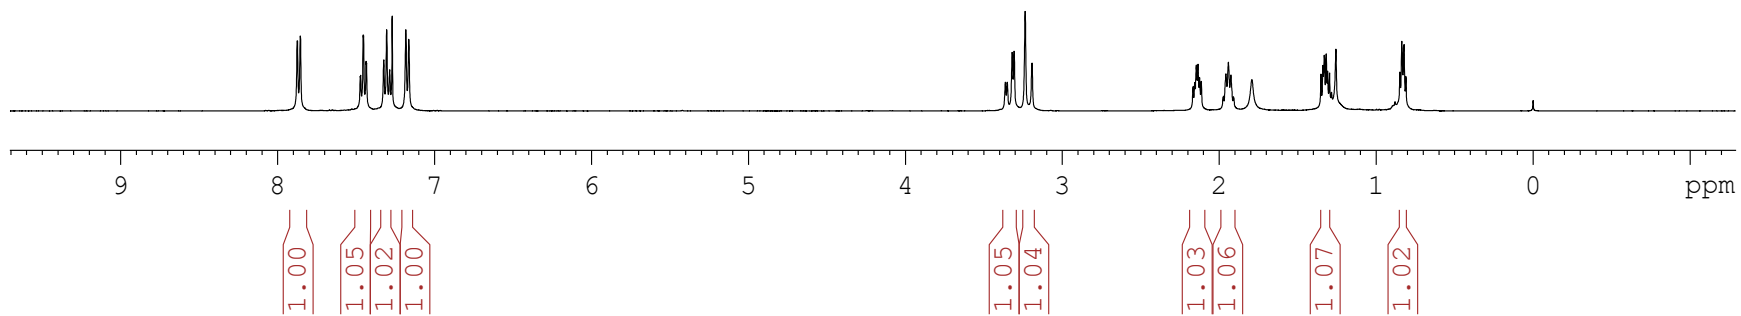

— 198.442

138.637  
133.165  
131.289  
128.987  
127.150  
127.092

77.478  
77.160  
76.843

28.071  
25.469

14.124  
12.975

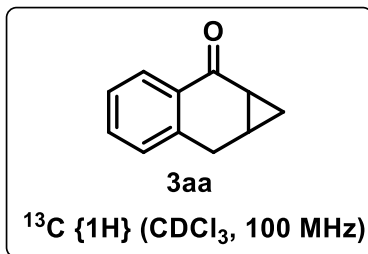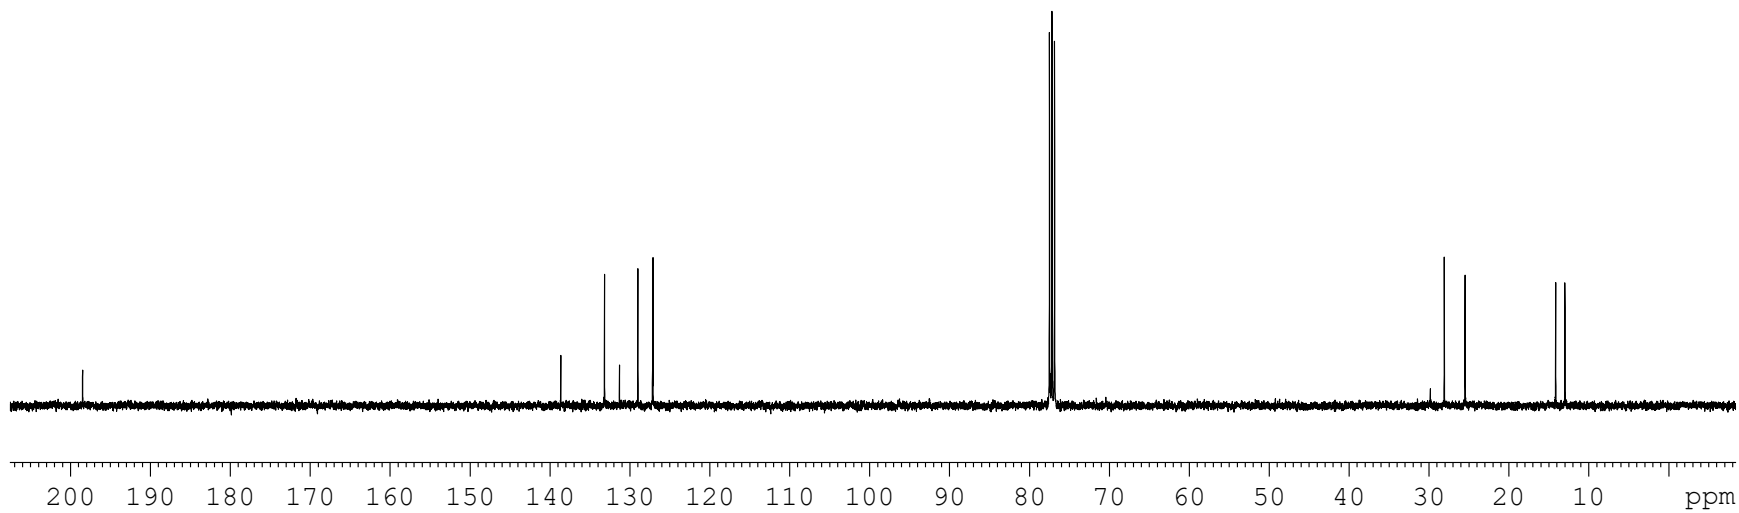

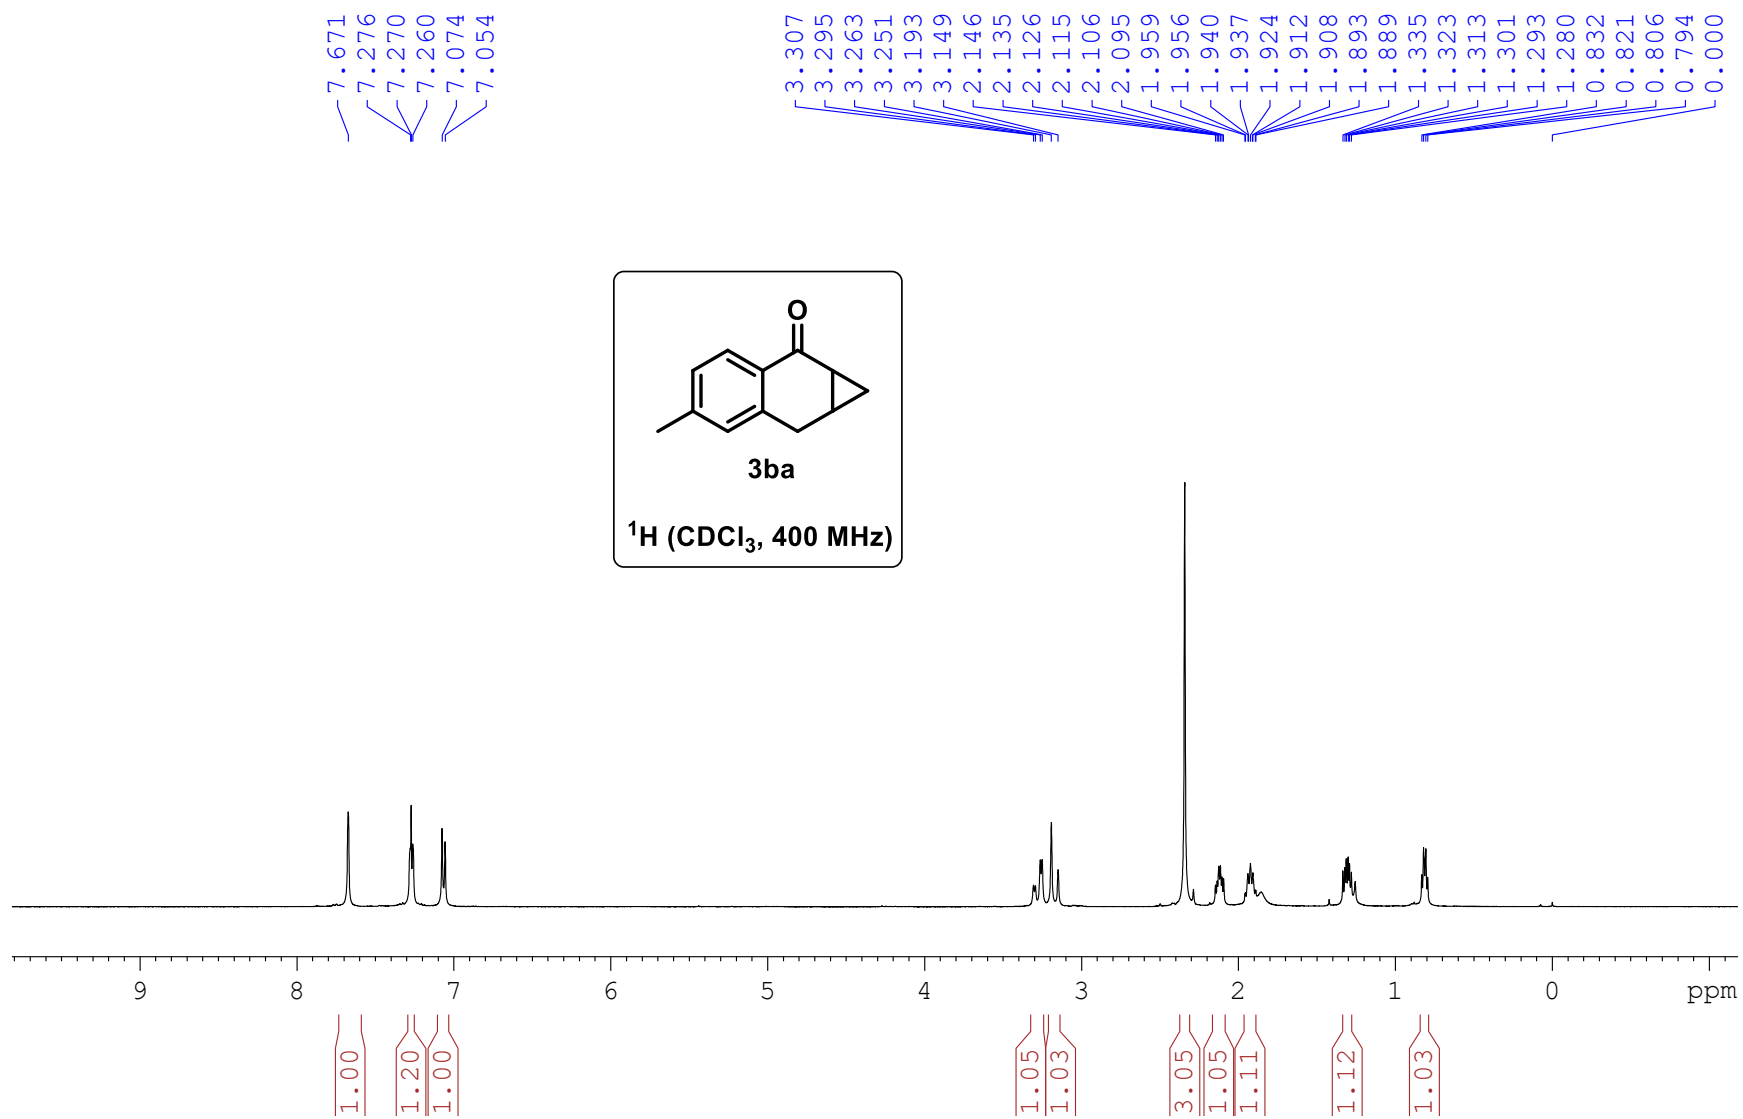

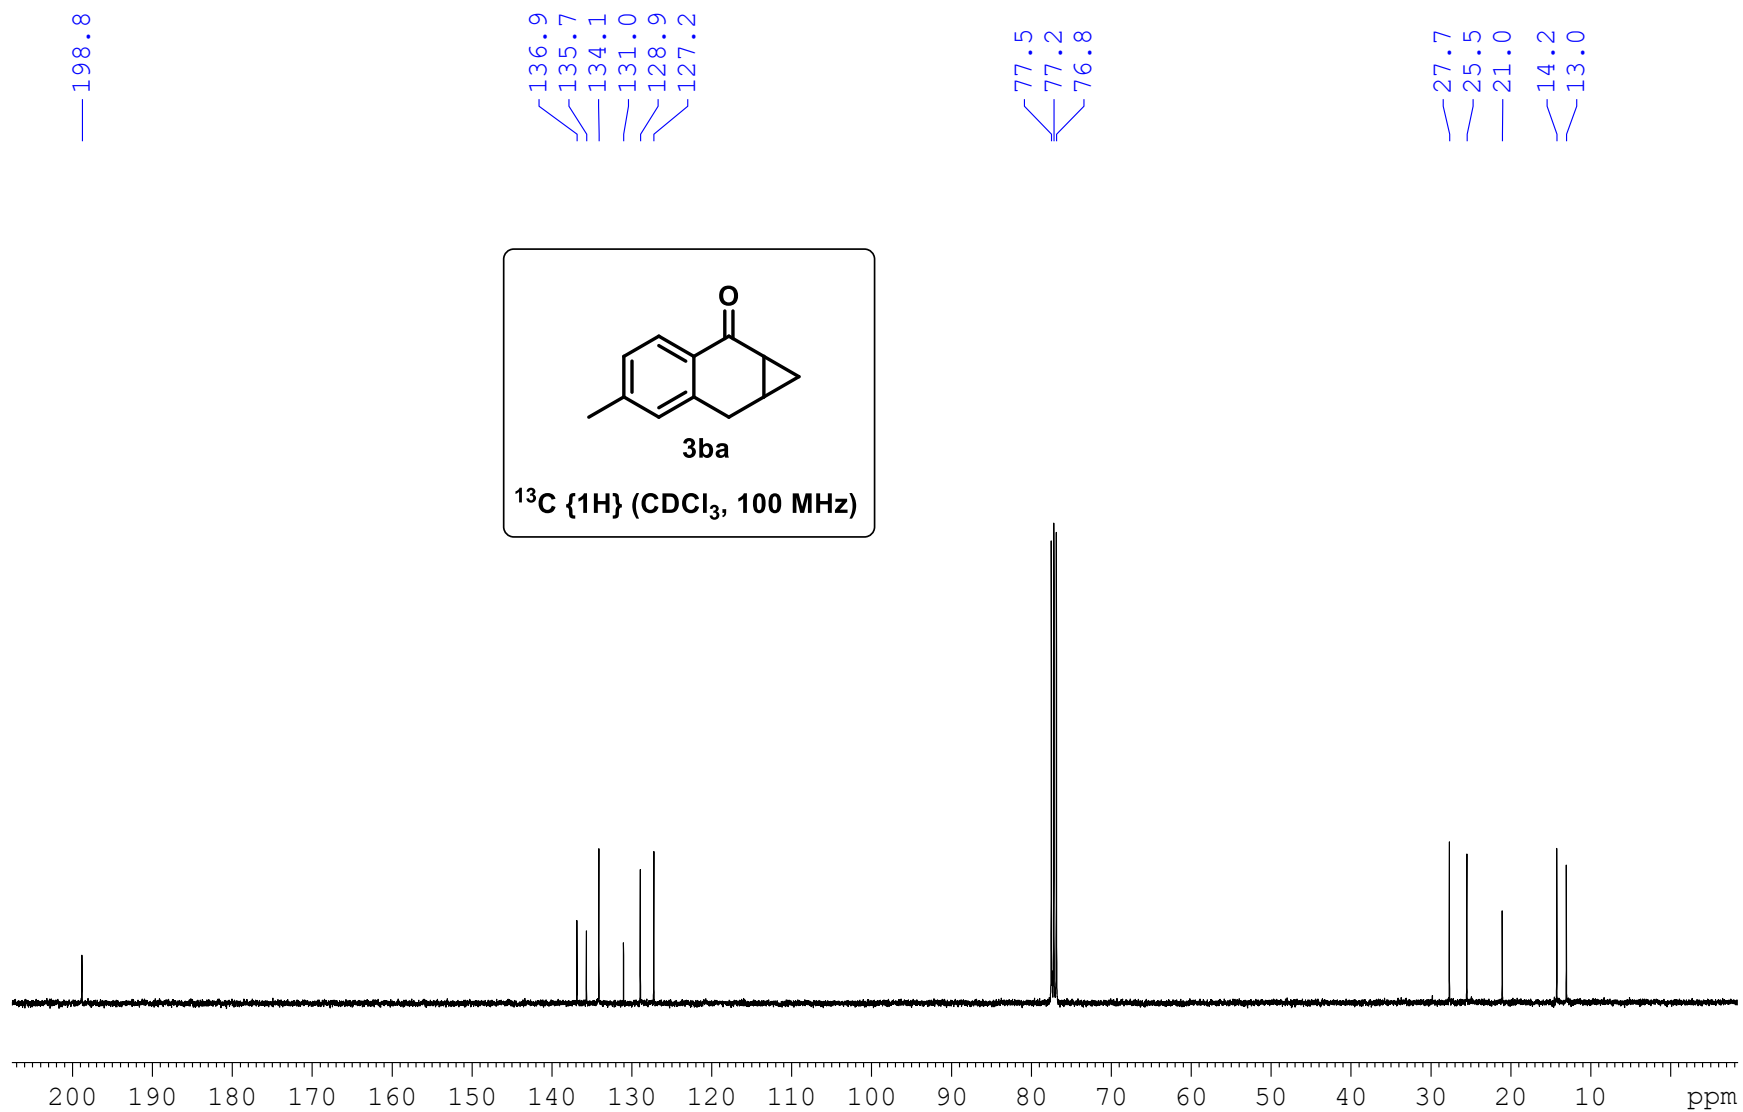



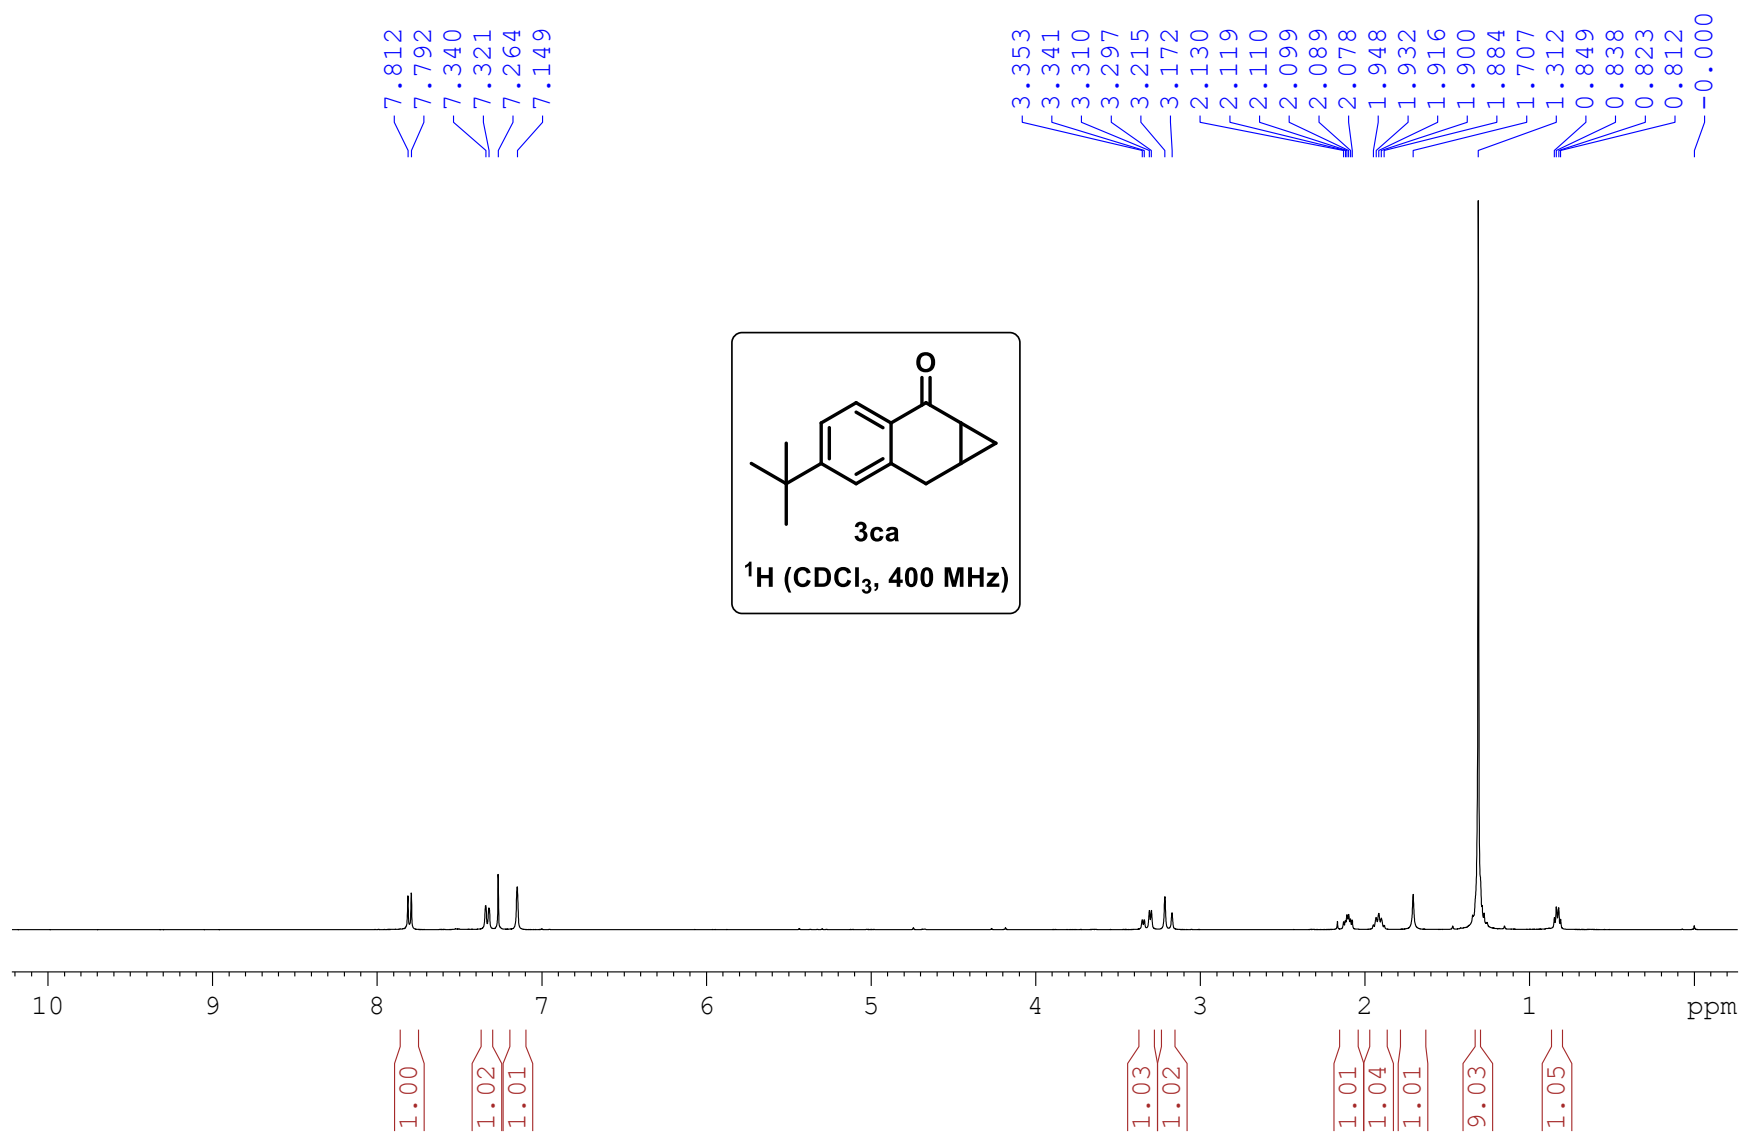

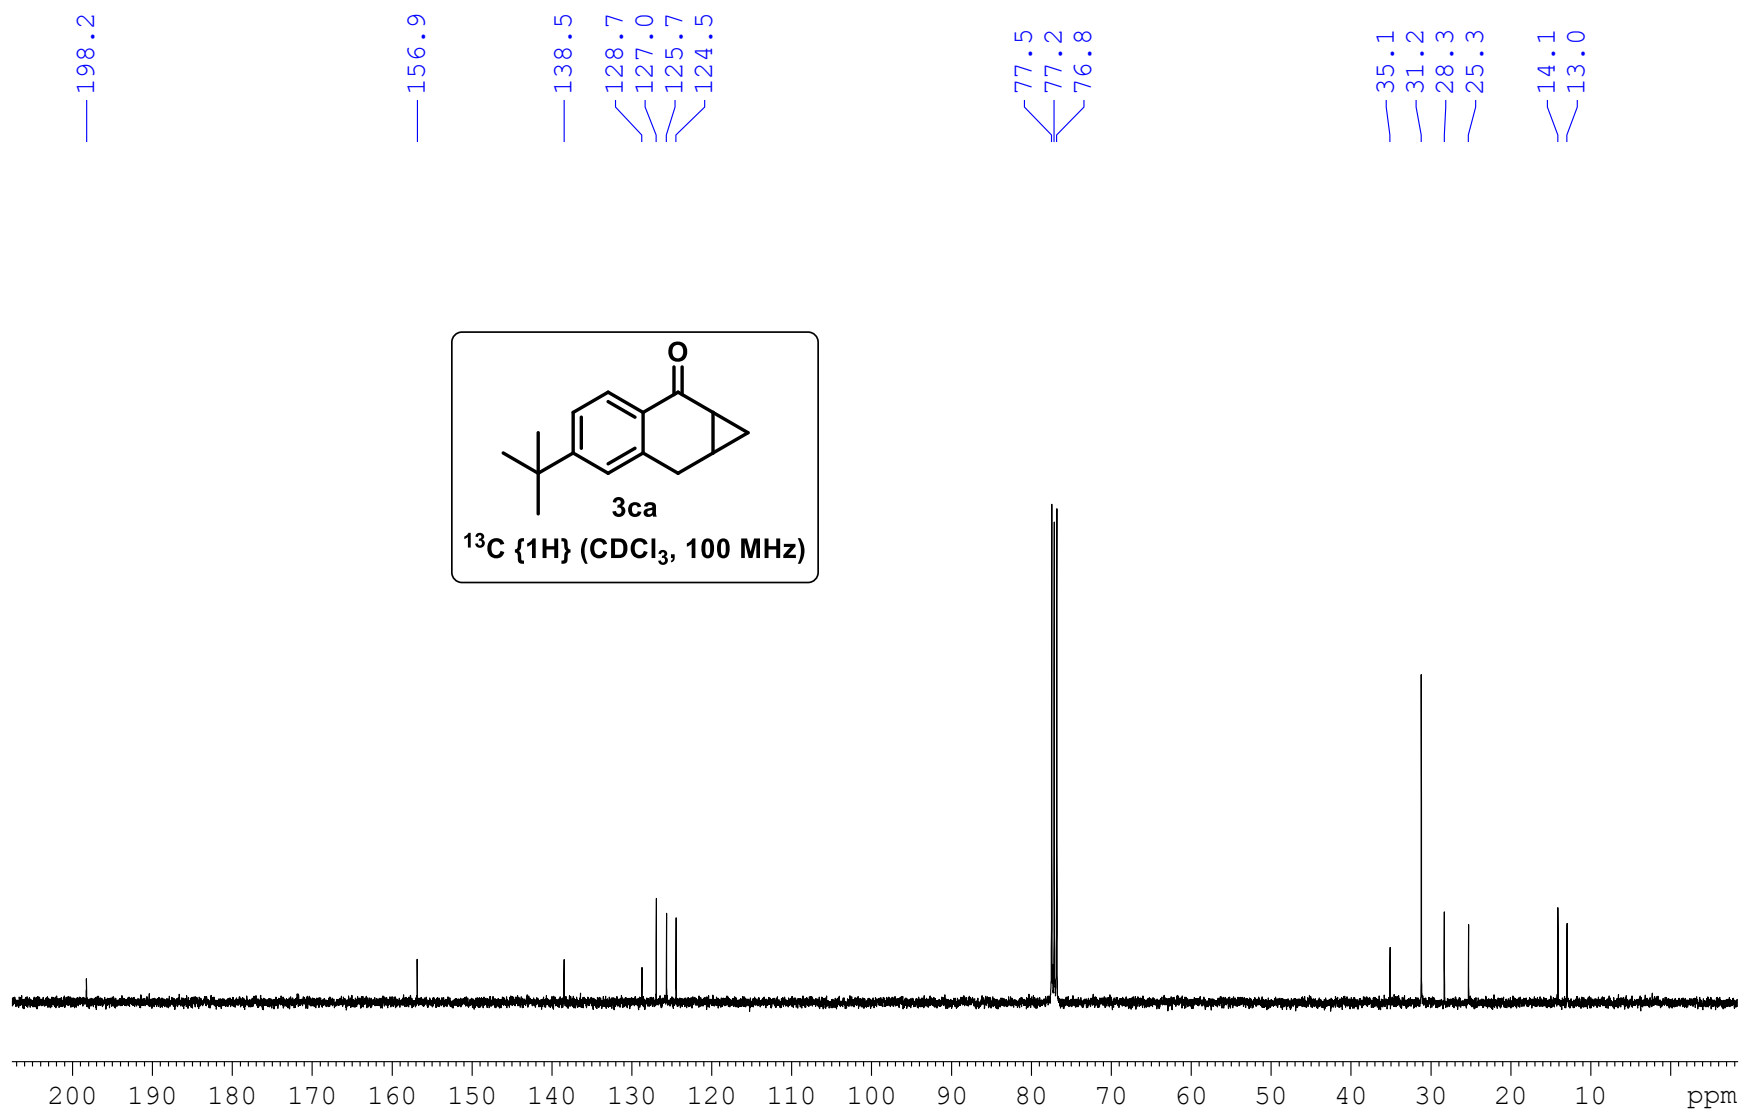

7.744  
7.724  
7.454  
7.434  
7.358  
7.270

3.349  
3.336  
3.305  
3.292  
3.207  
3.163  
2.166  
2.155  
2.146  
2.135  
2.124  
2.114  
1.983  
1.980  
1.964  
1.961  
1.948  
1.945  
1.935  
1.932  
1.916  
1.913  
1.378  
1.366  
1.356  
1.344  
1.336  
1.323  
0.839  
0.826  
0.812  
0.800  
0.000

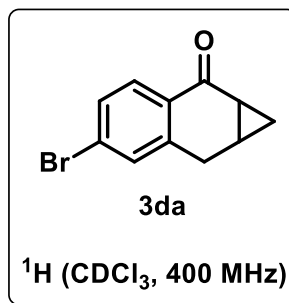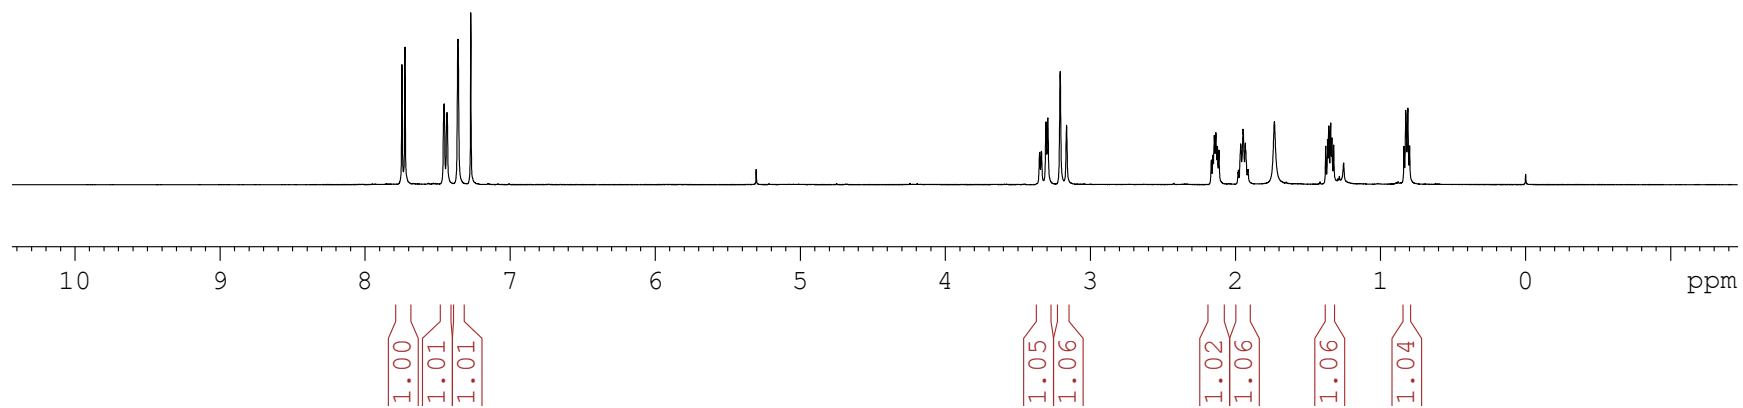

— 197.4

140.4  
131.9  
130.6  
130.1  
128.9  
128.1

77.5  
77.2  
76.8

27.8  
25.3

14.2  
12.9

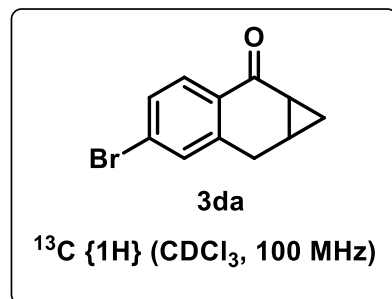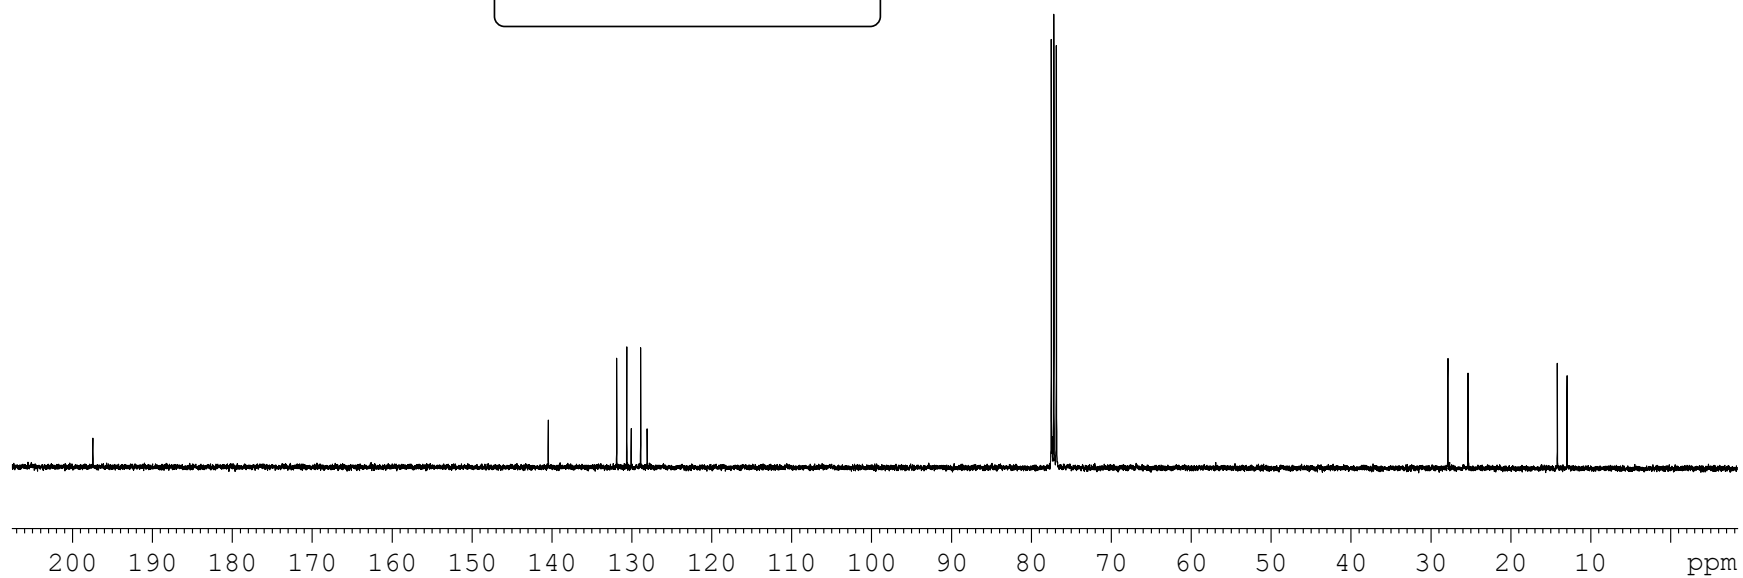

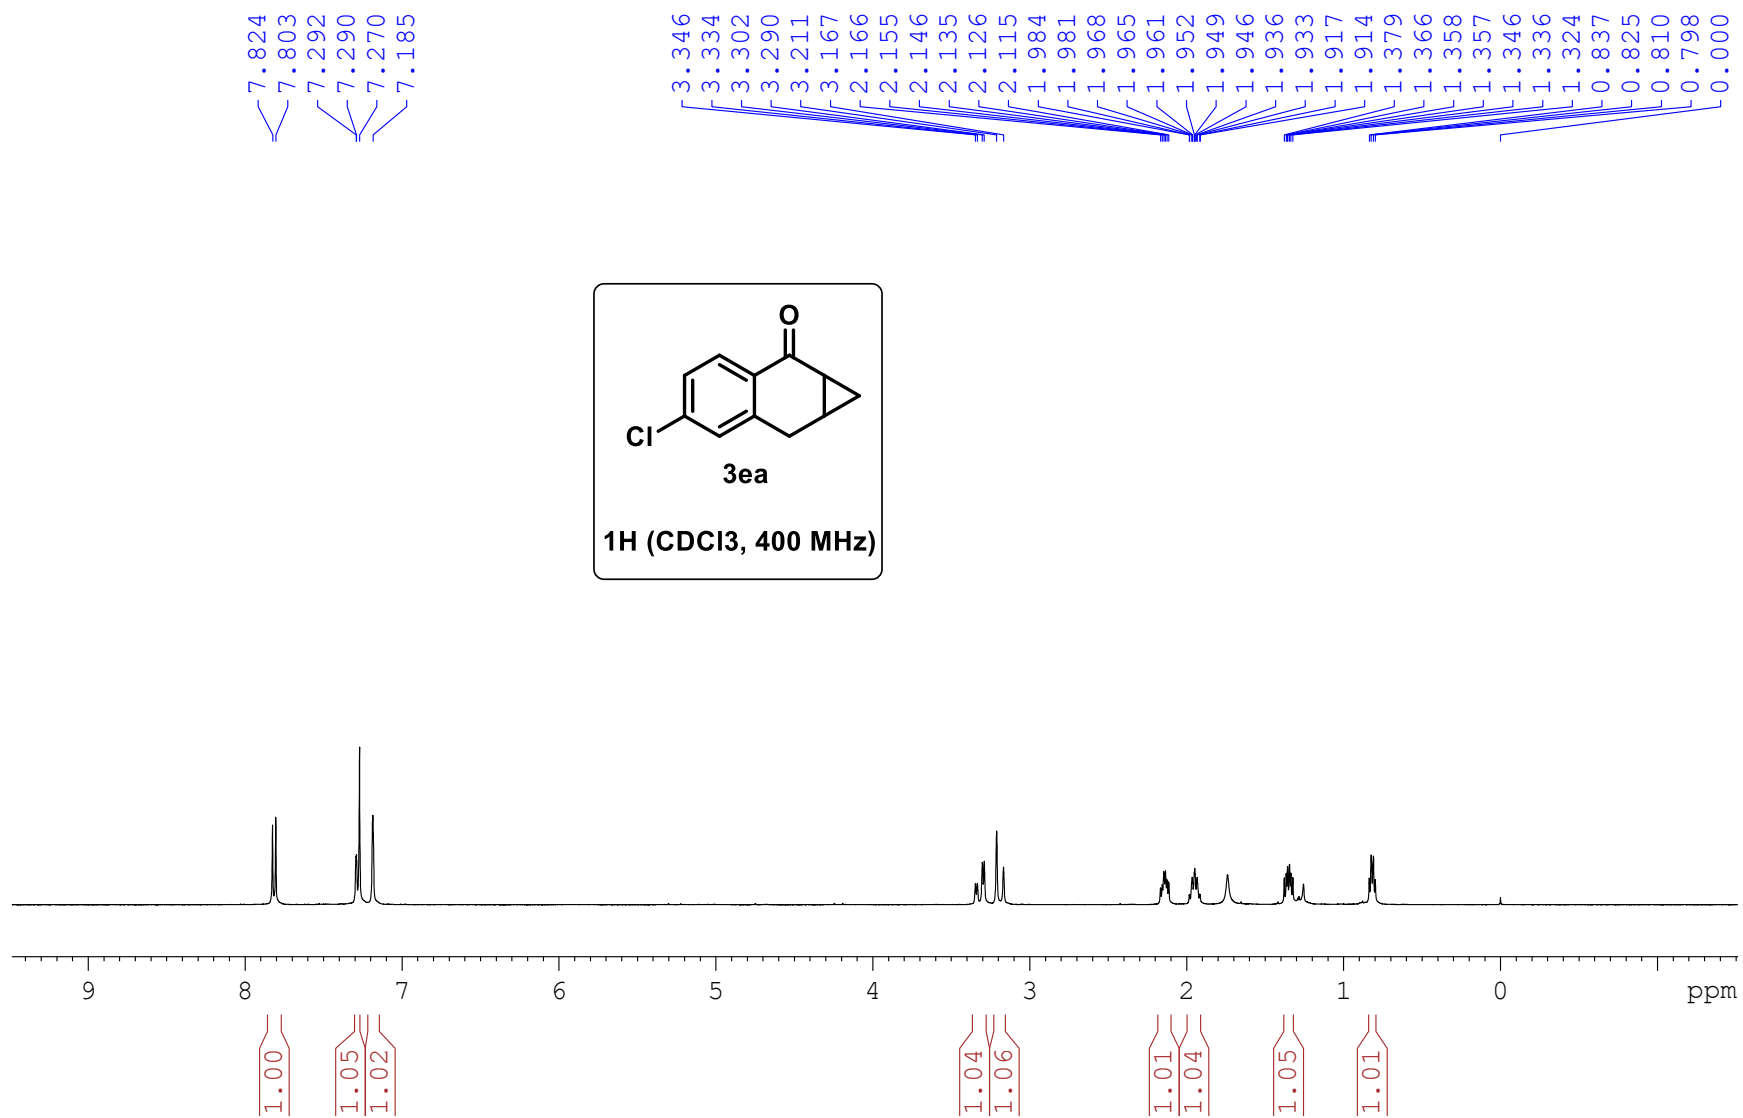

— 197.2

140.3  
139.4  
129.7  
128.9  
128.8  
127.7

77.5  
77.2  
76.8

27.9  
25.3

14.2  
13.0

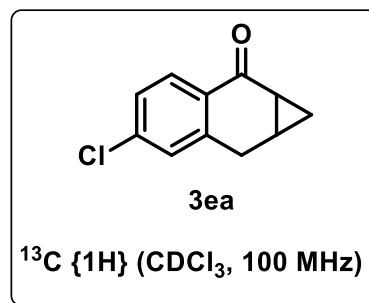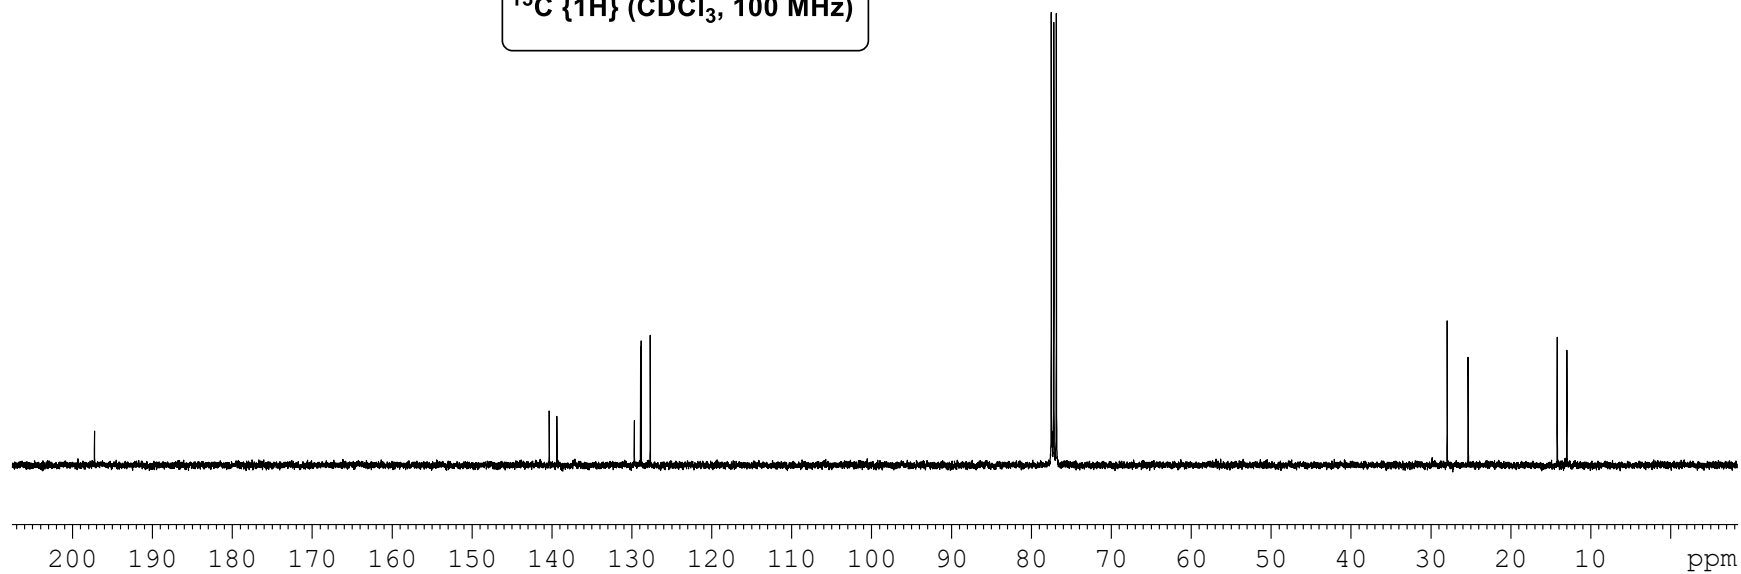

7.675  
7.654  
7.584  
7.575  
7.554  
7.274

3.325  
3.313  
3.281  
3.269  
3.181  
3.137  
2.161  
2.151  
2.140  
2.129  
2.120  
2.109  
1.971  
1.968  
1.952  
1.949  
1.936  
1.923  
1.920  
1.904  
1.902  
1.374  
1.361  
1.353  
1.340  
1.331  
1.319  
0.837  
0.825  
0.810  
0.798  
-0.000

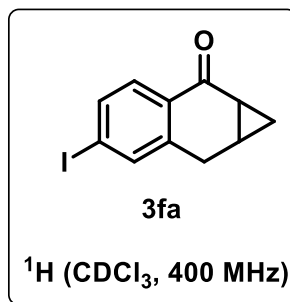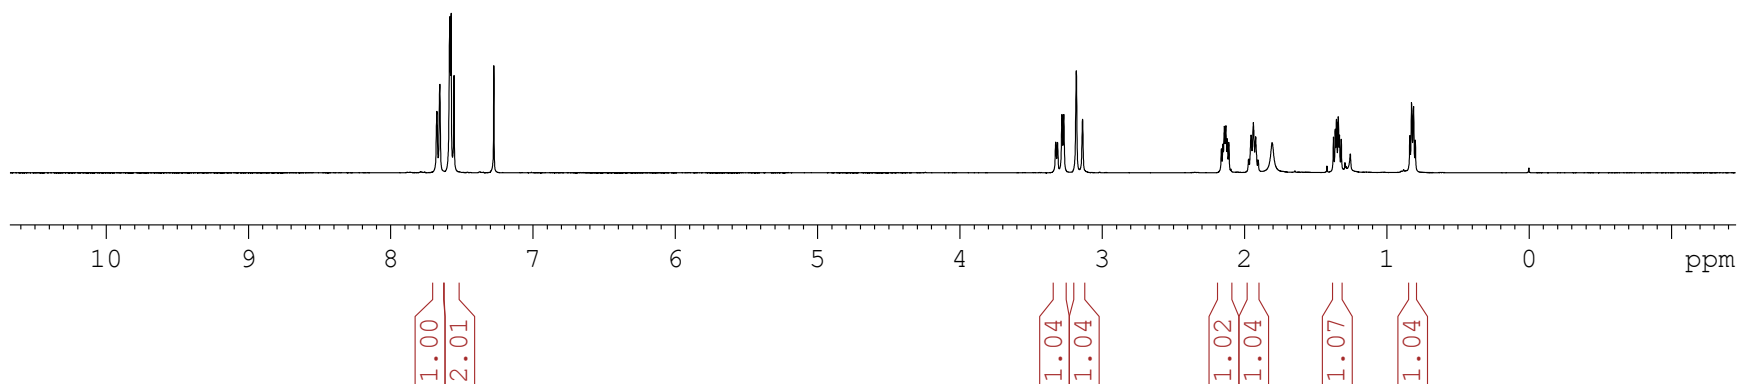

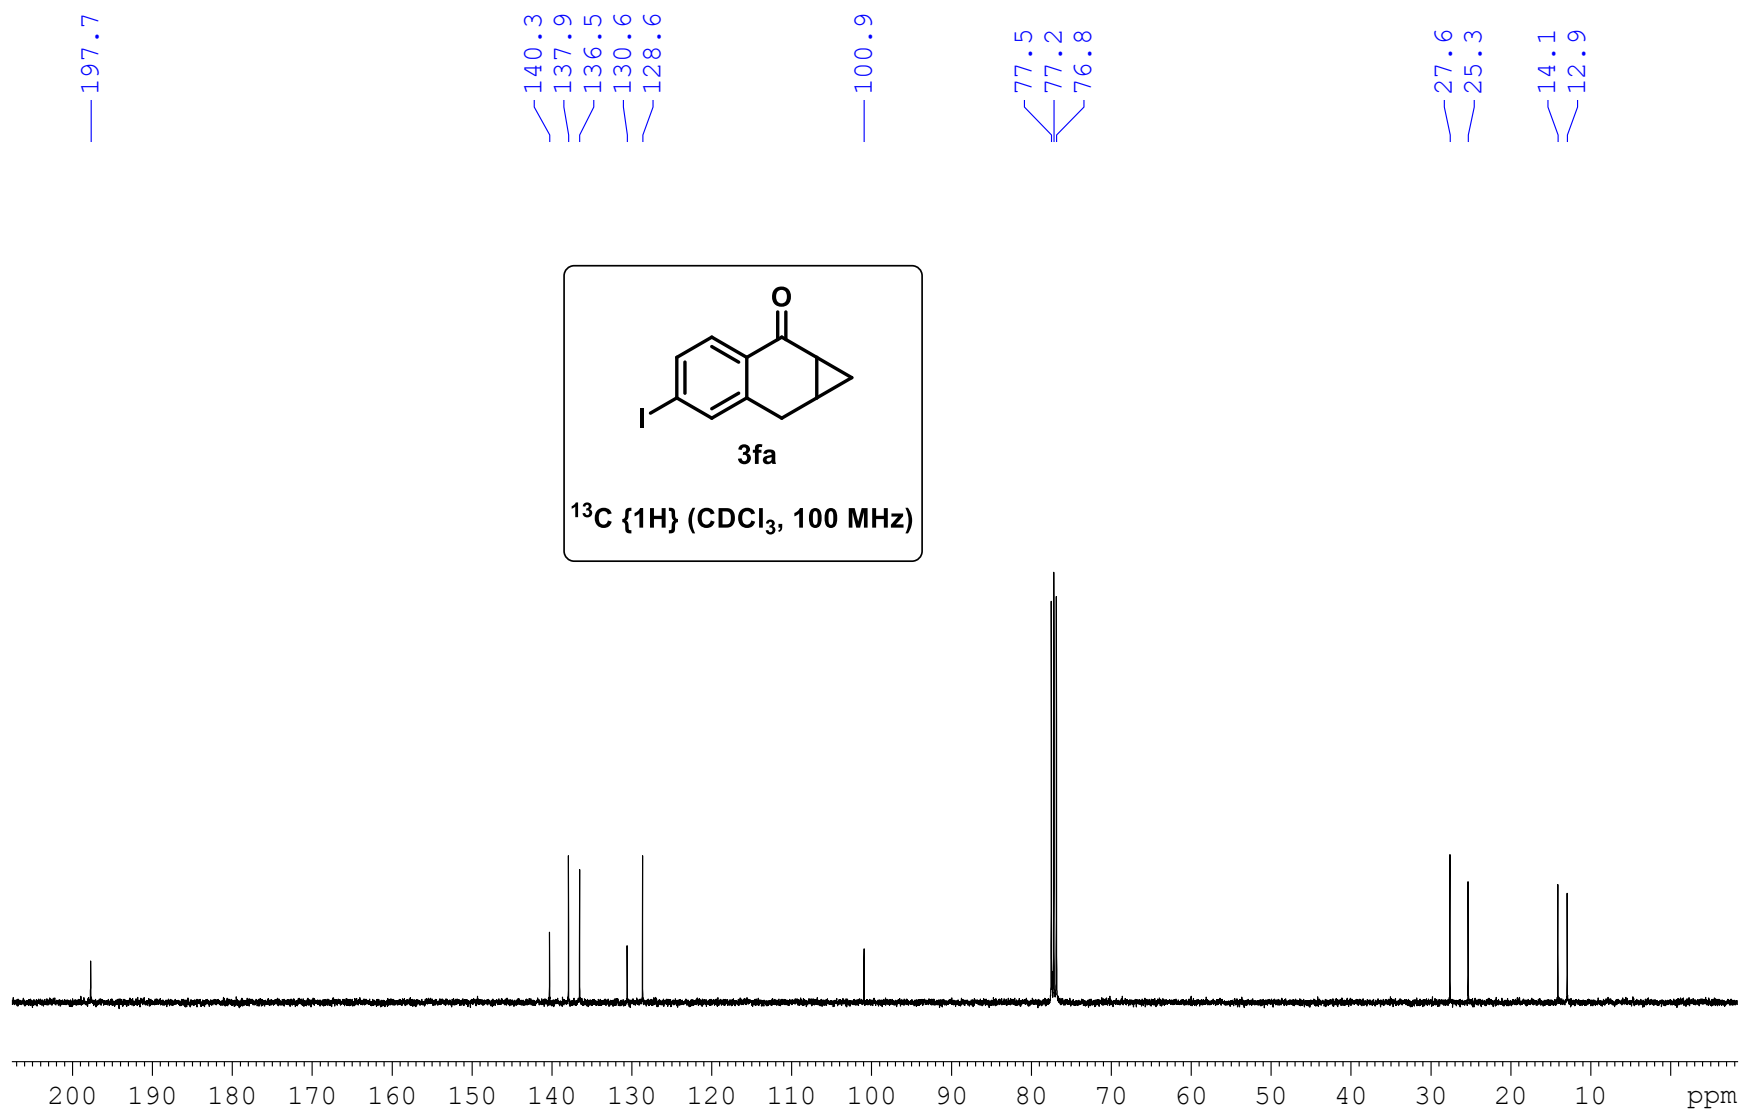



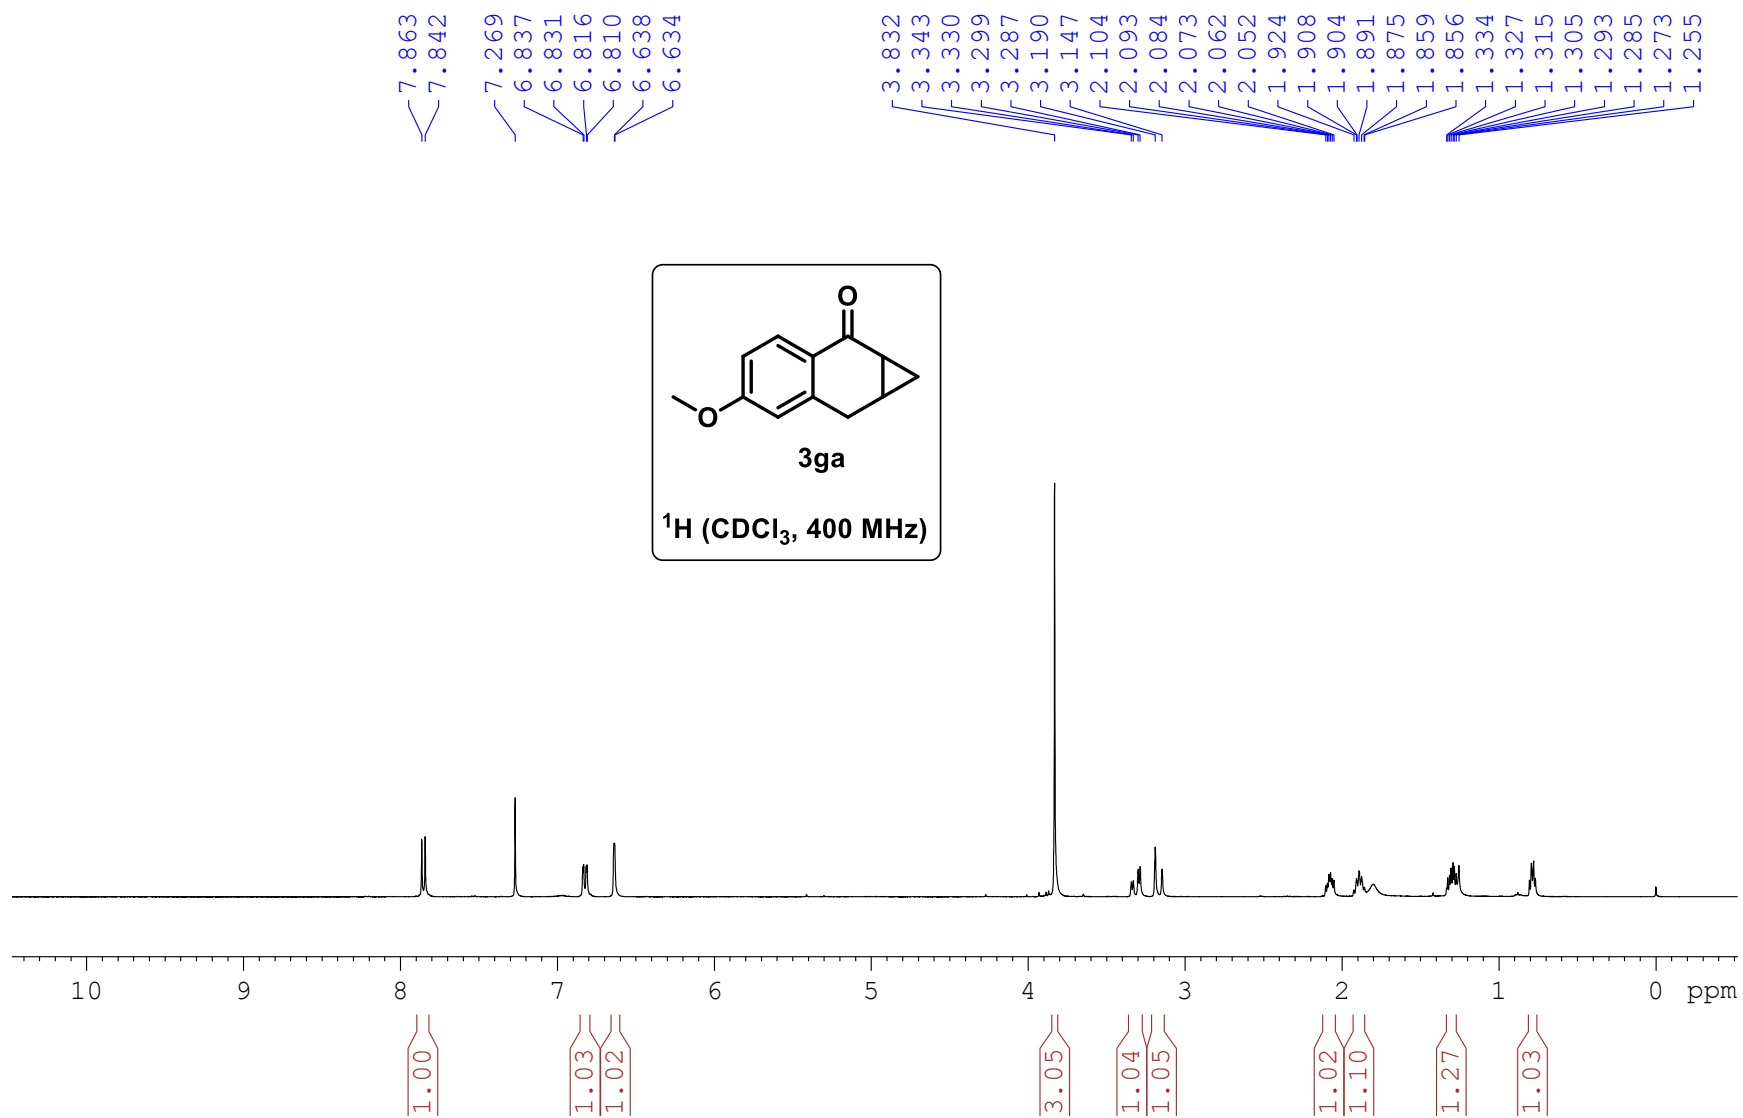

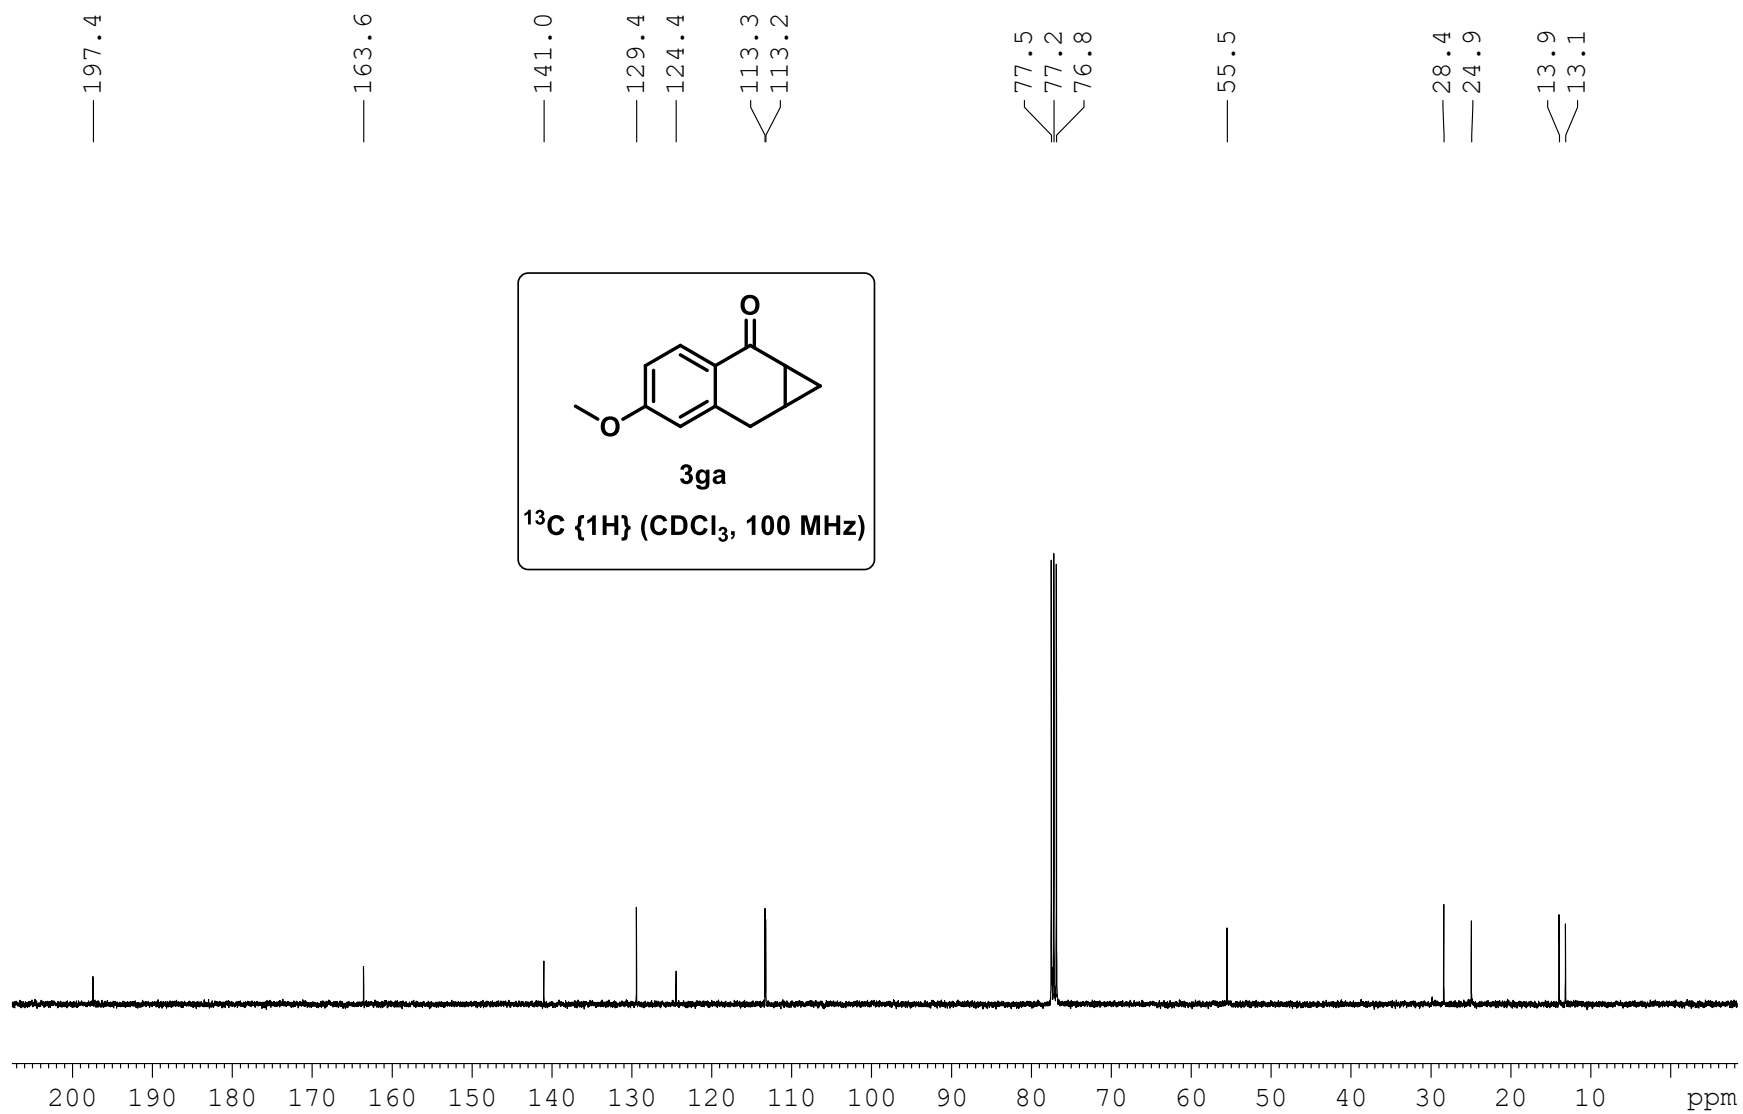

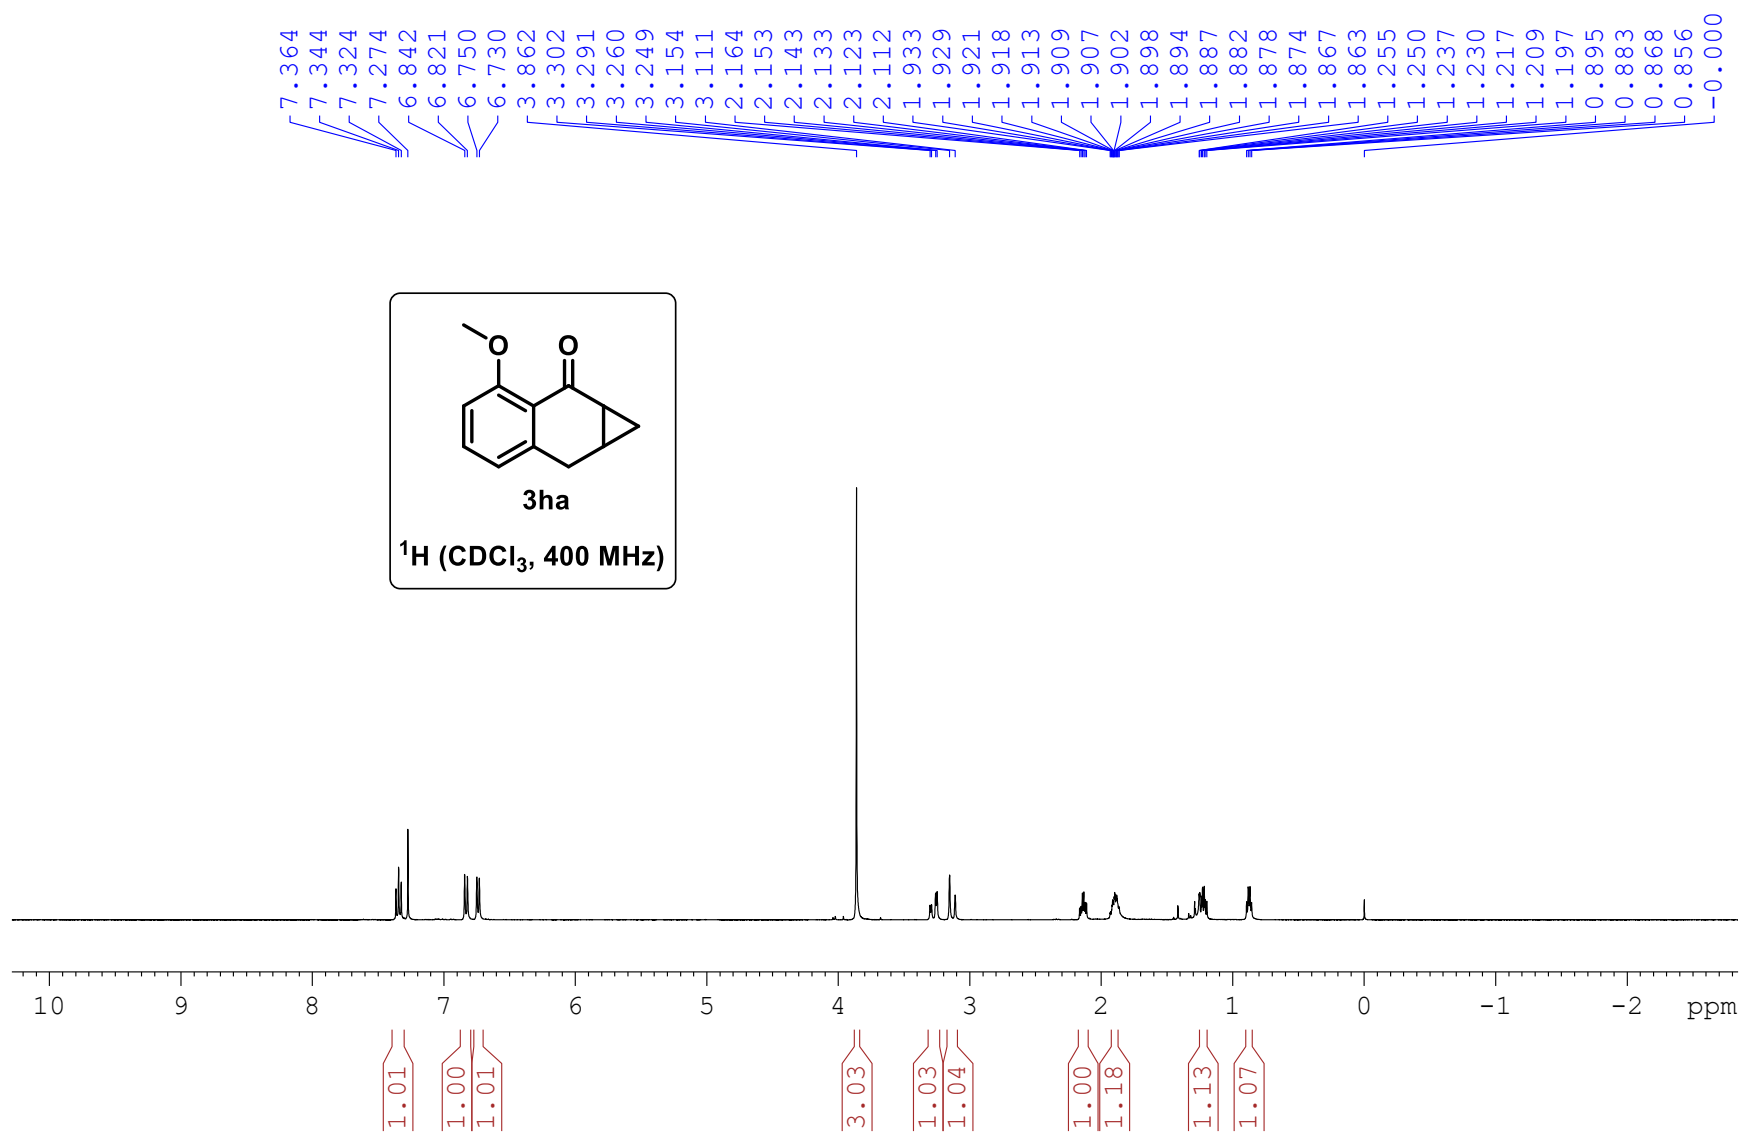

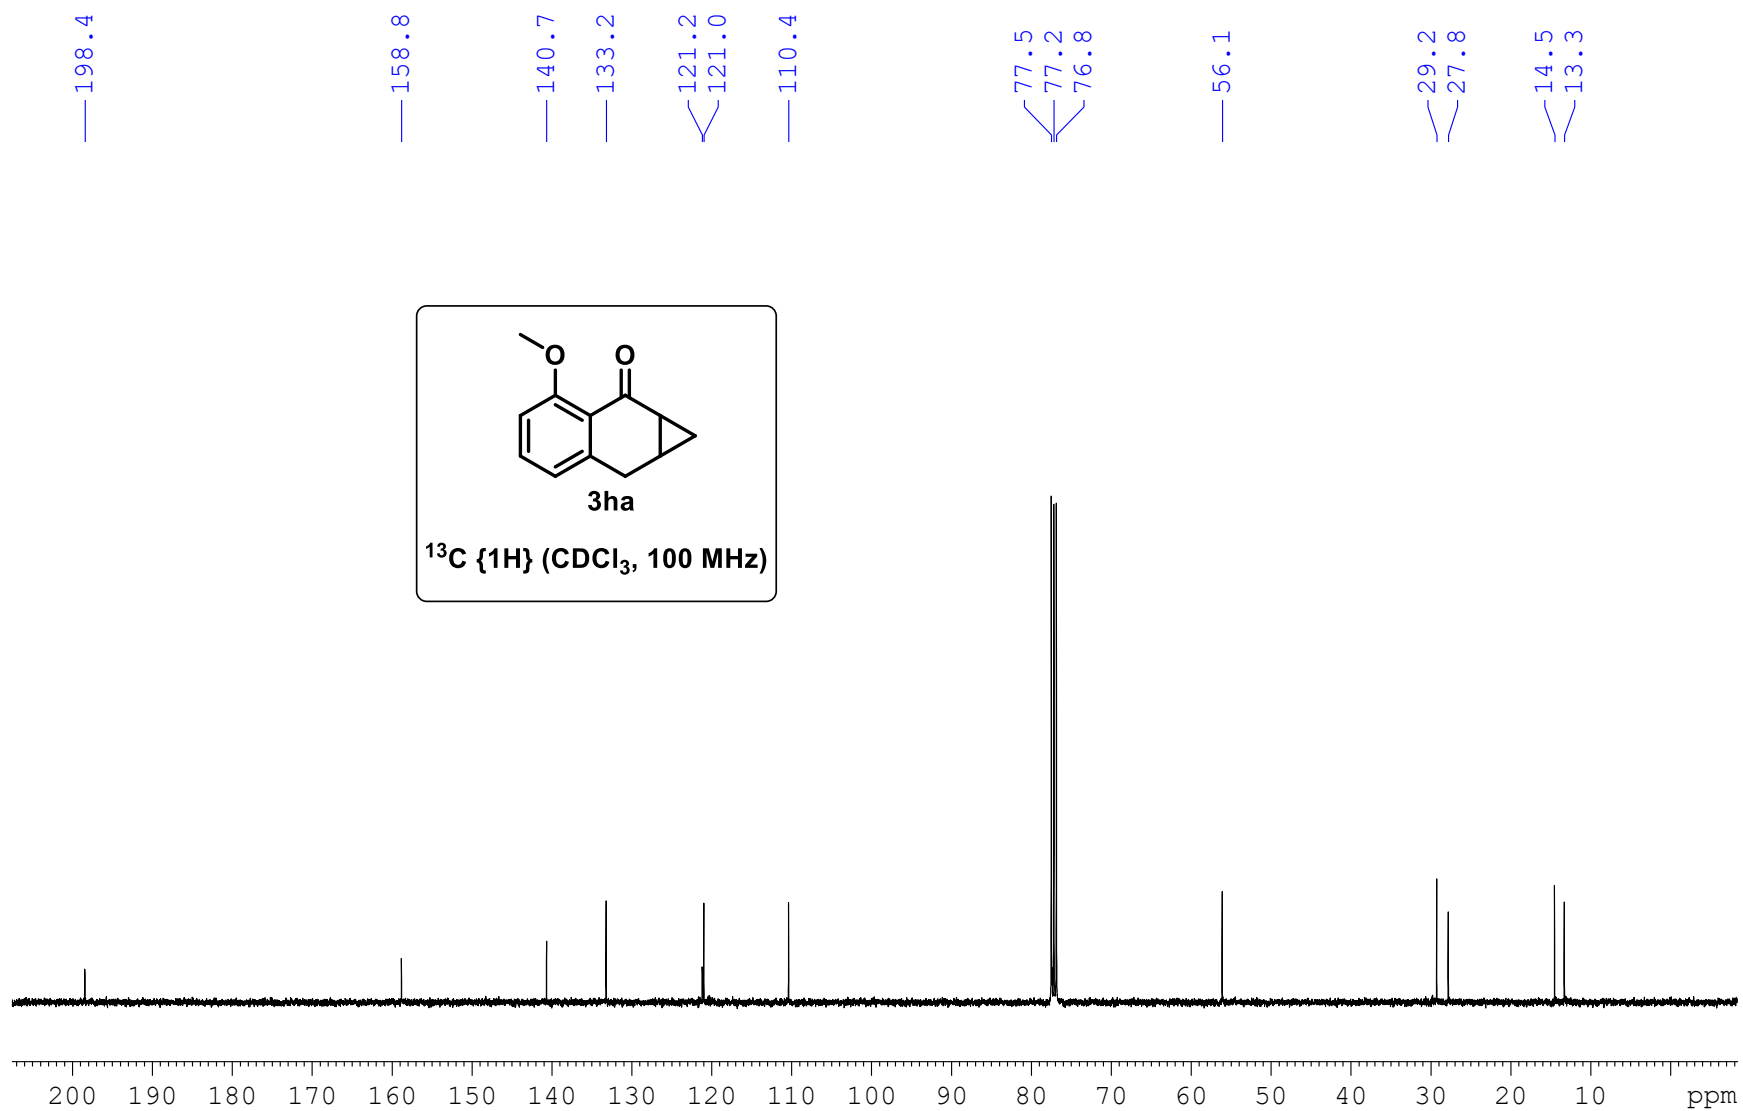

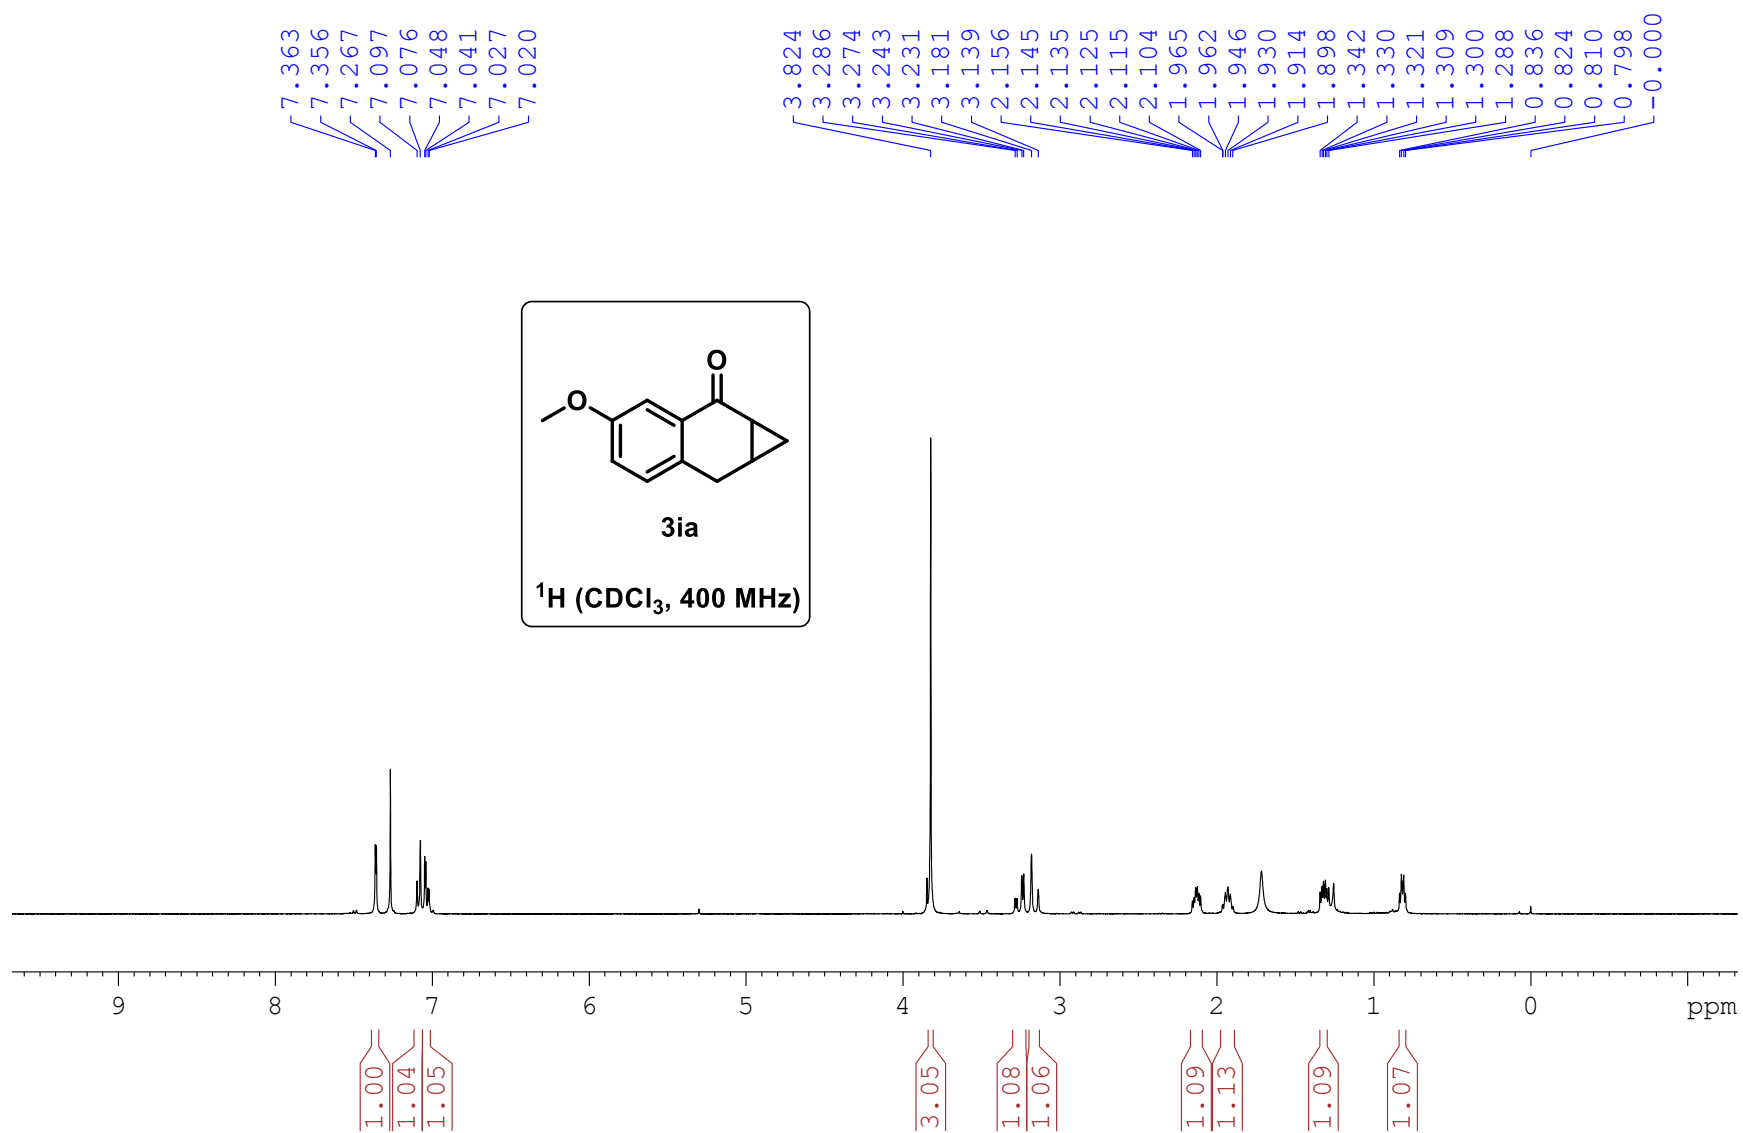

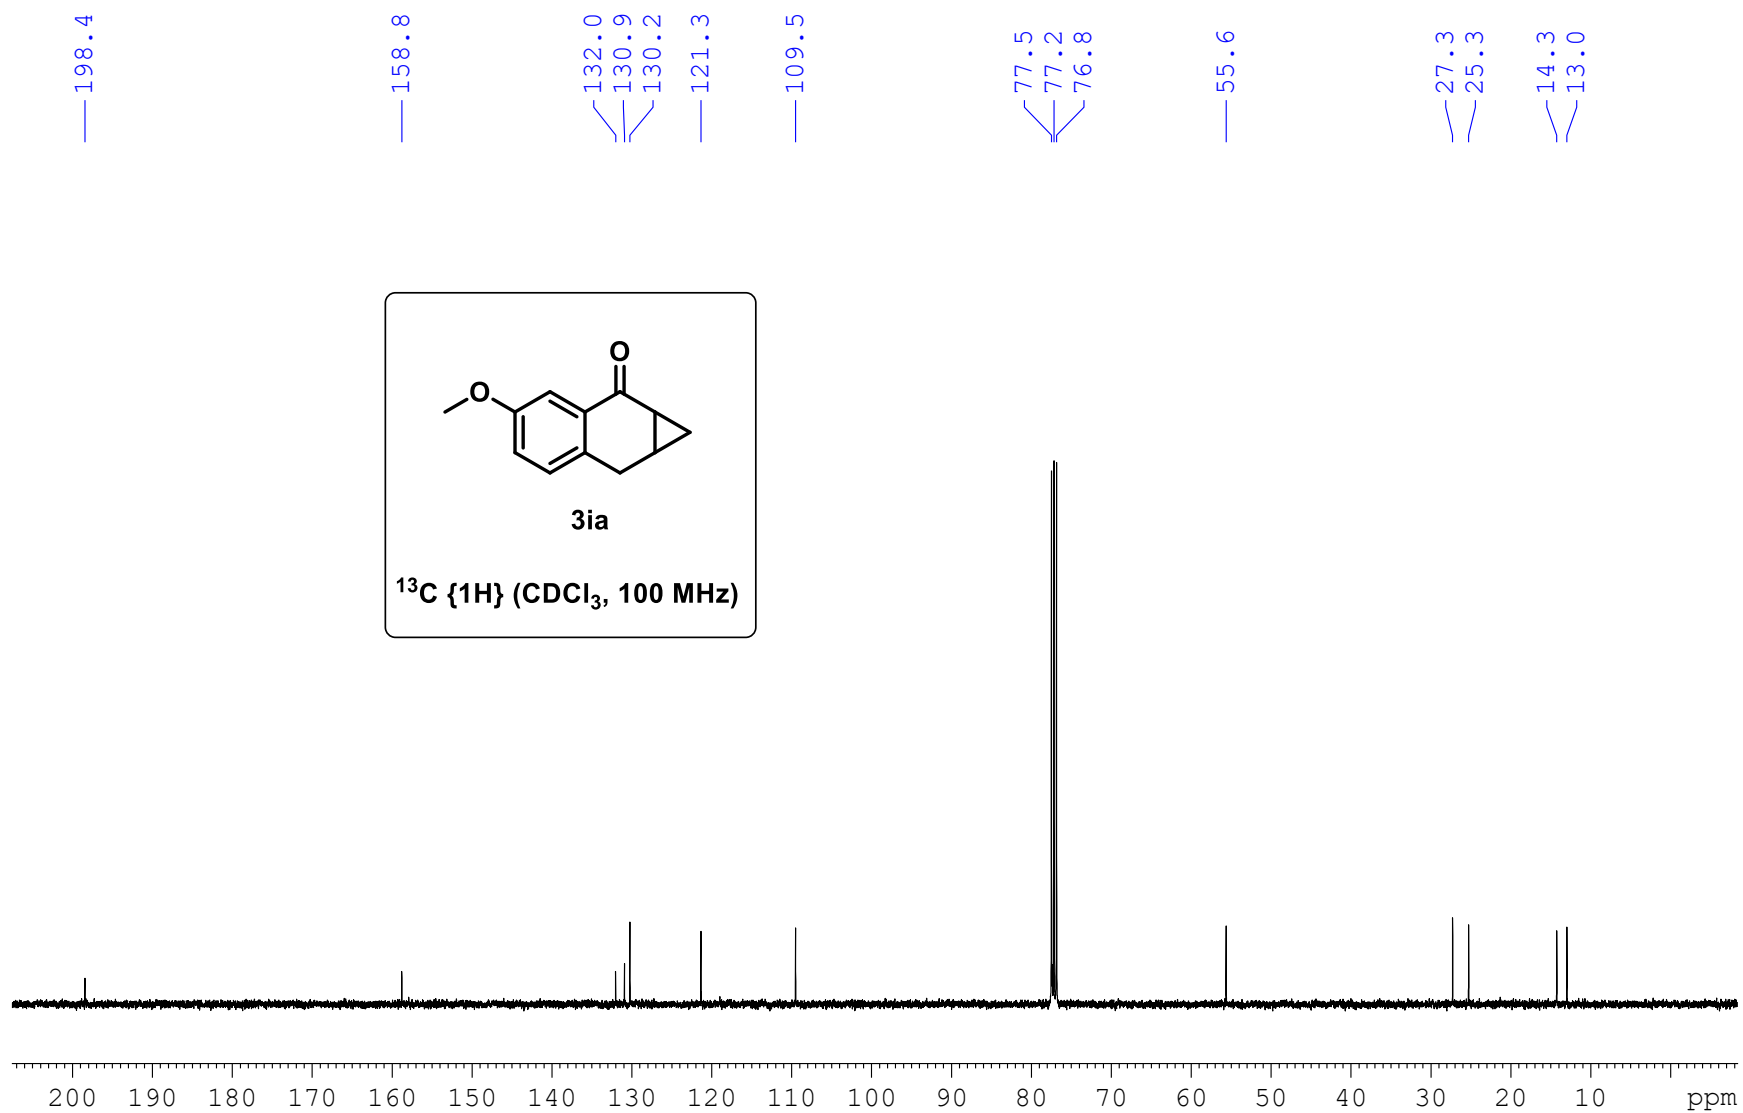

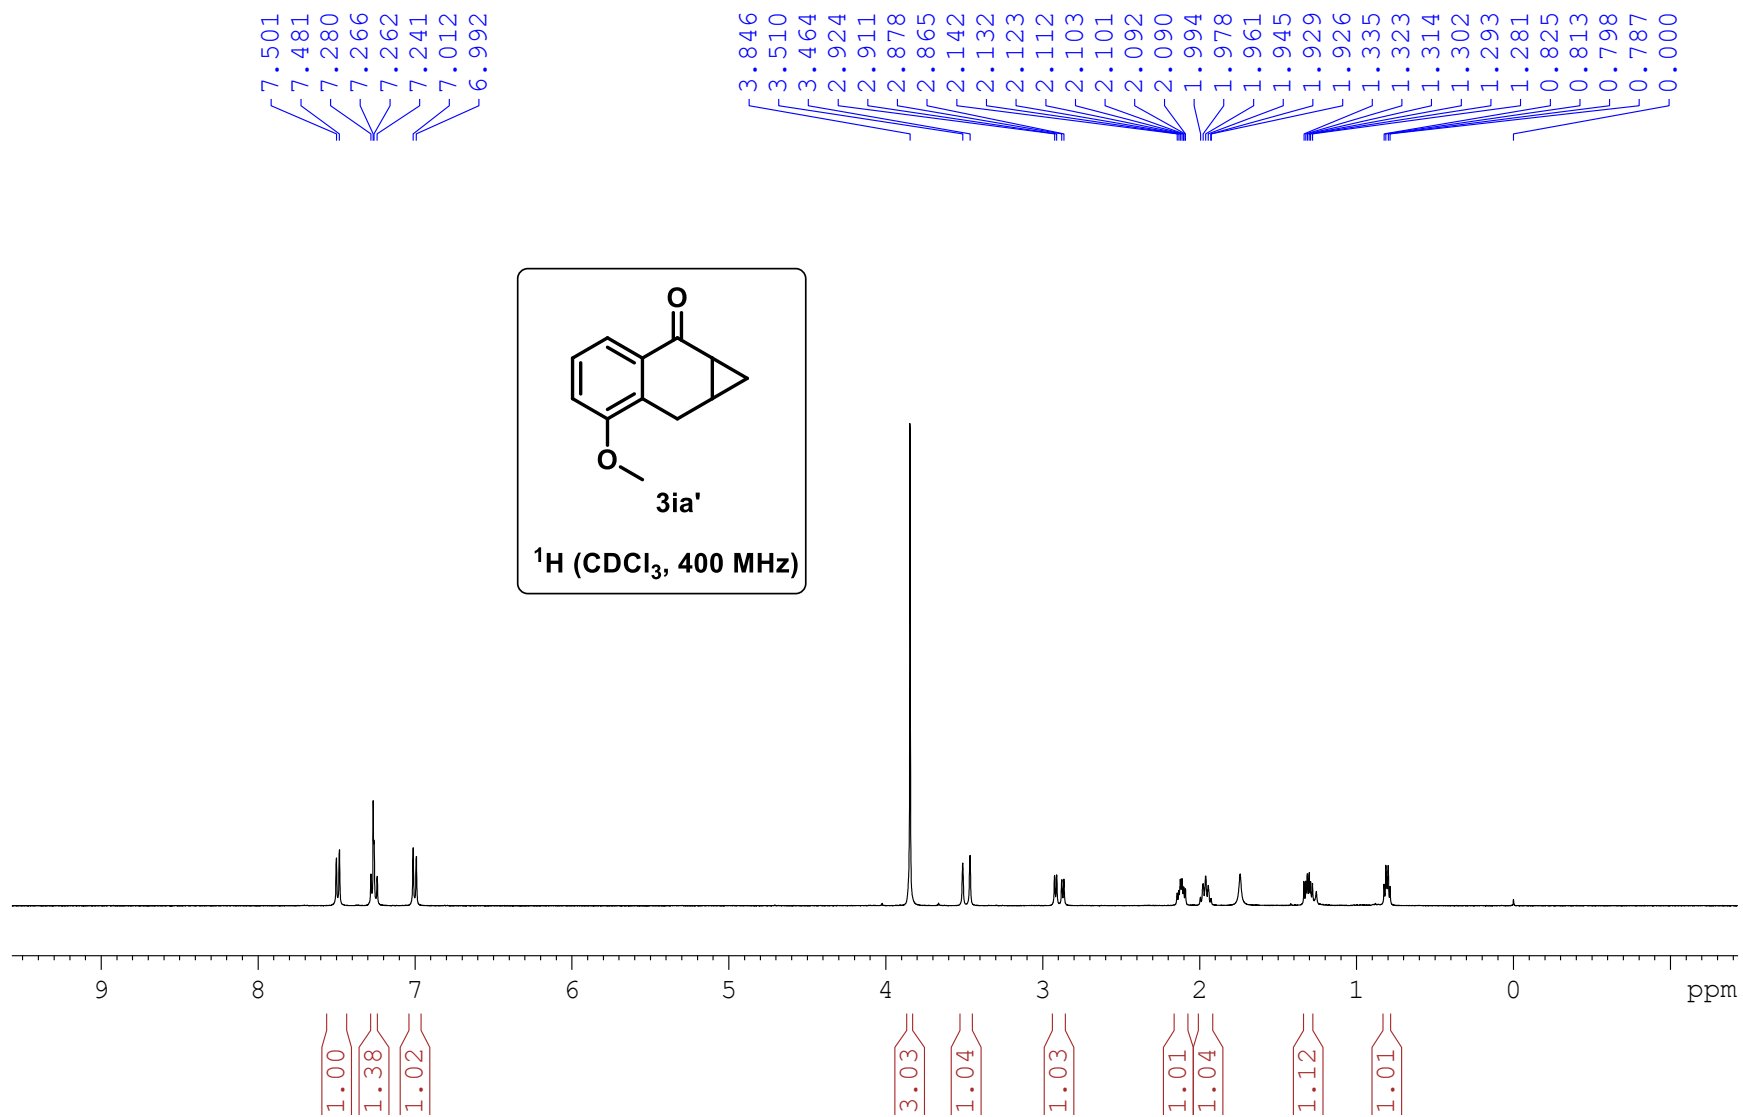

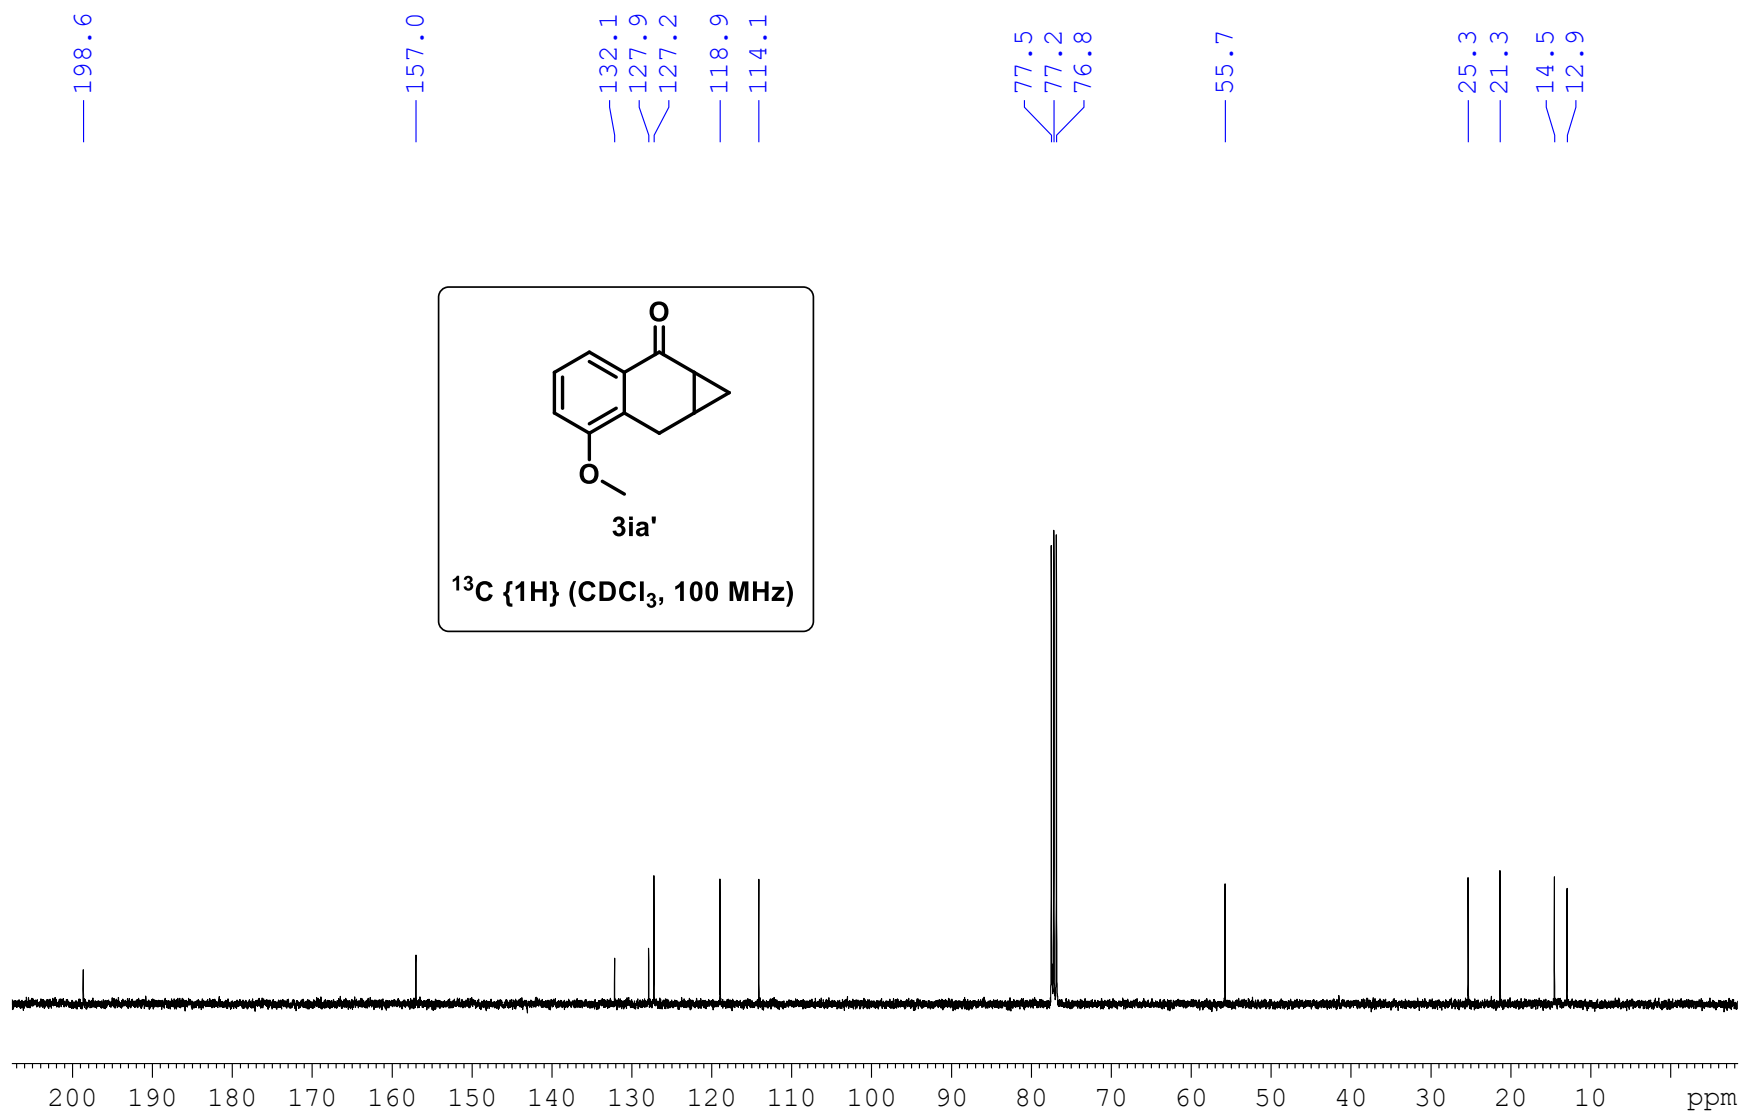



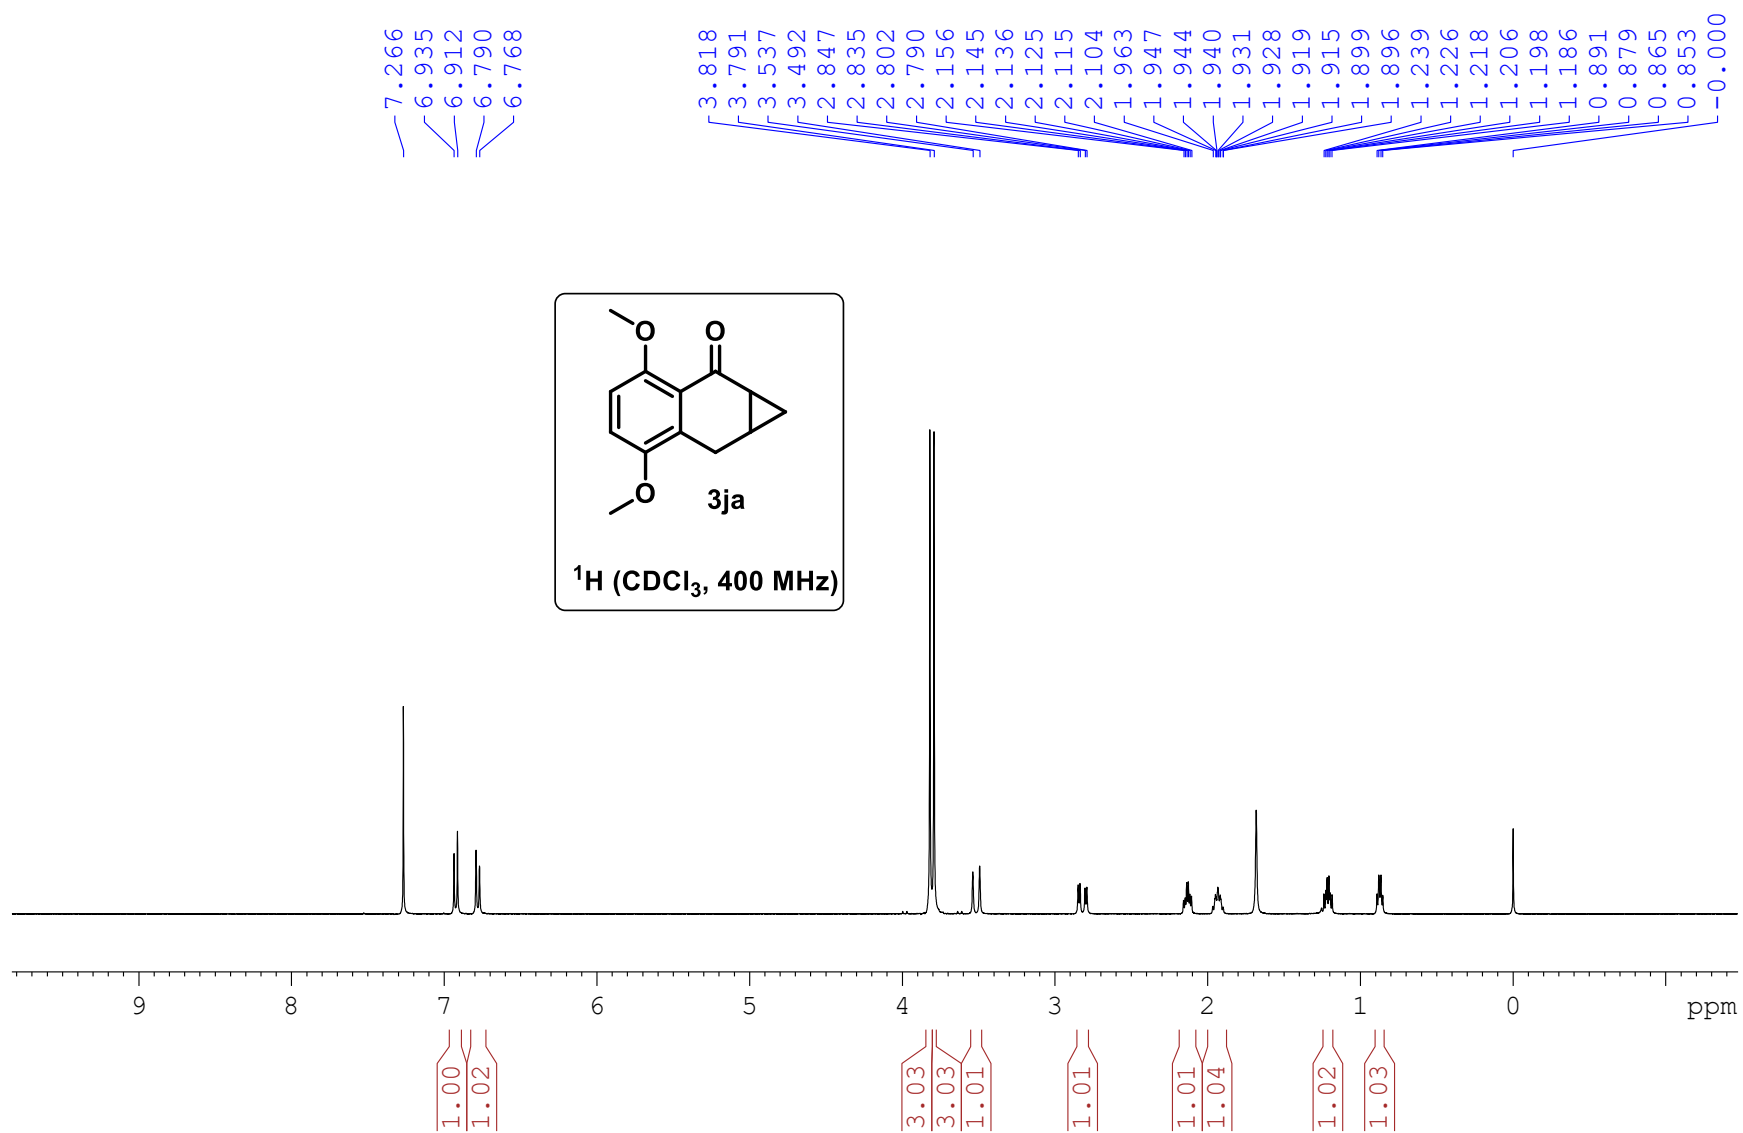

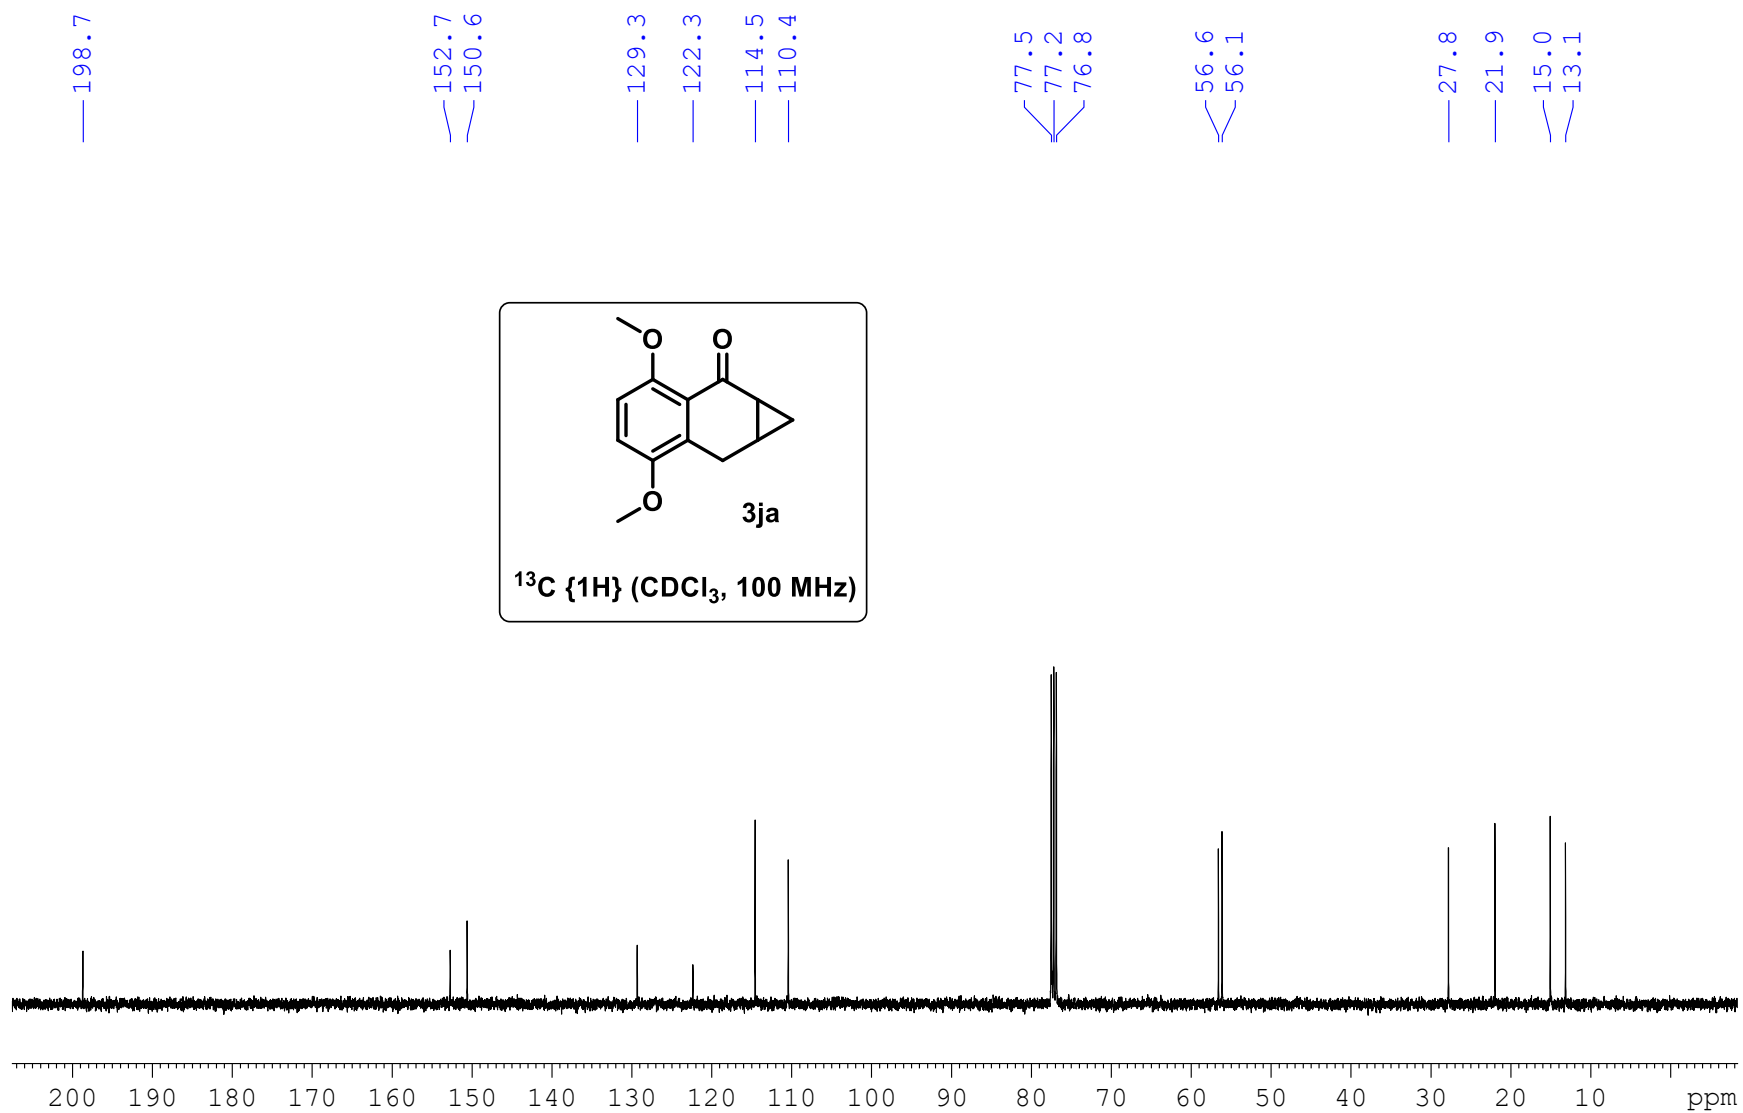

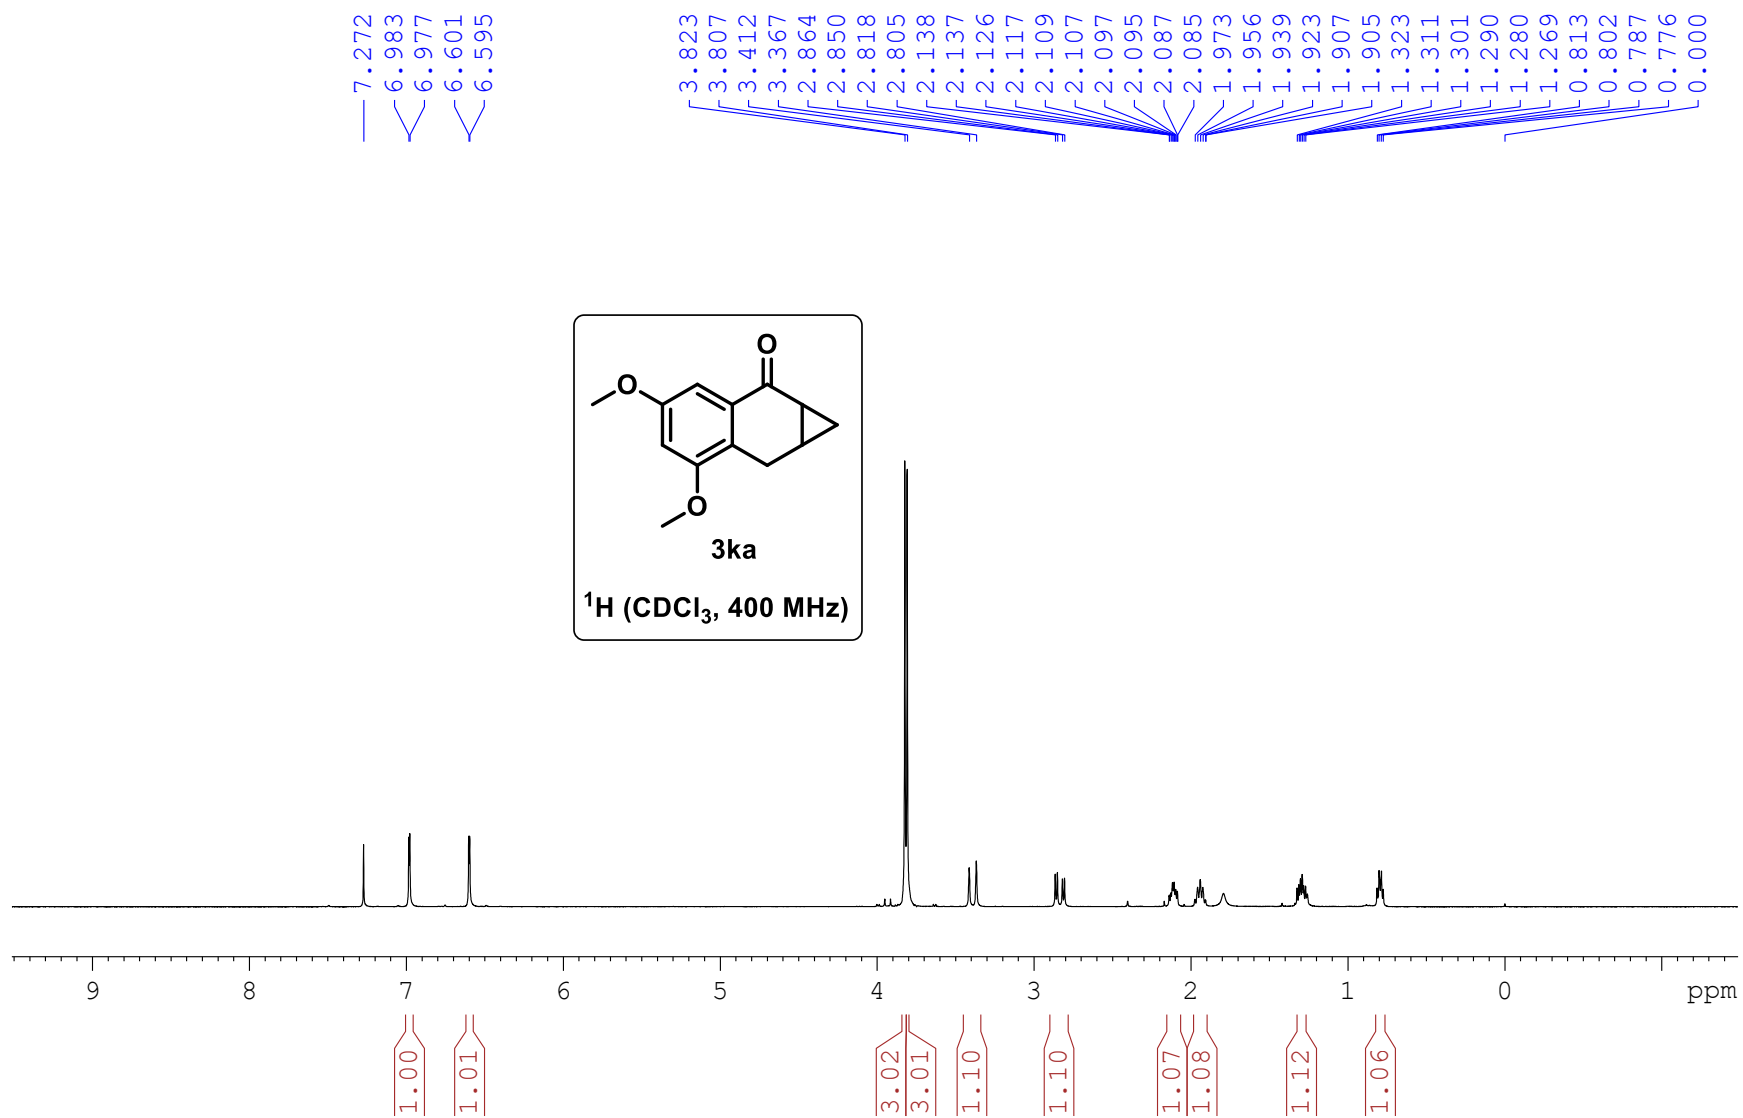

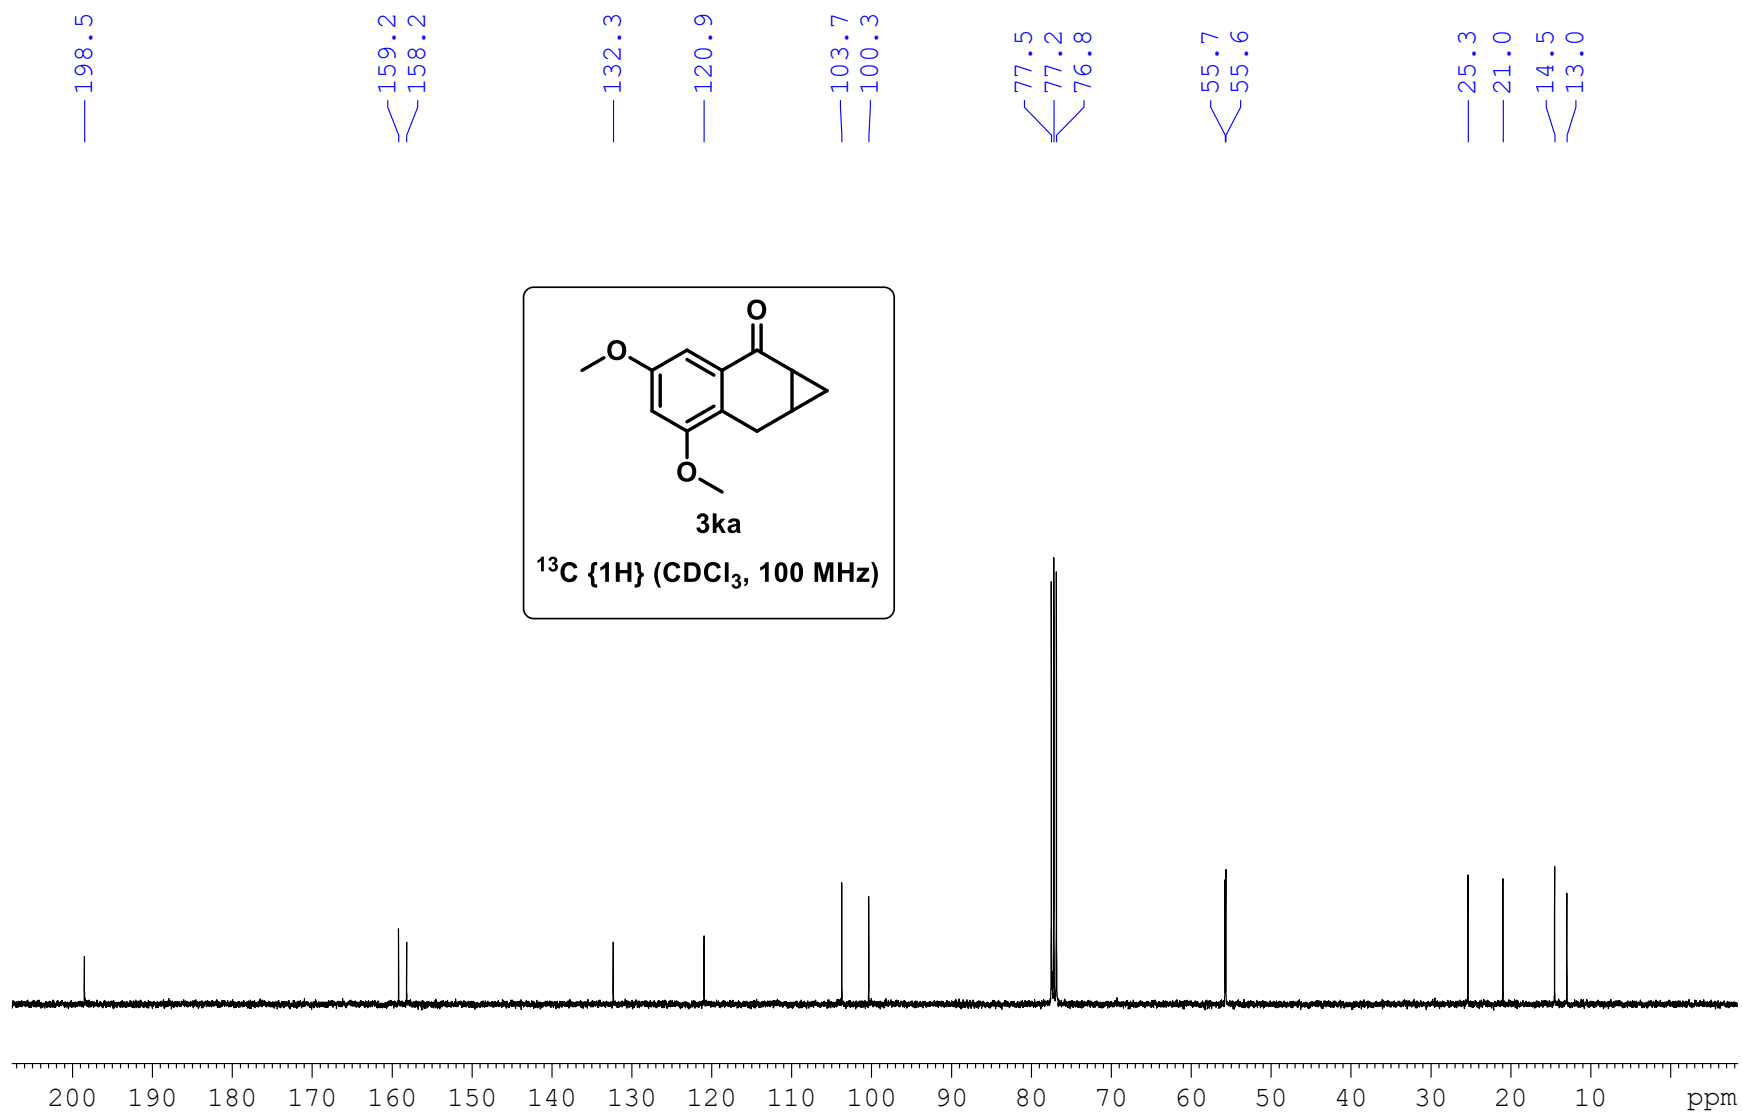

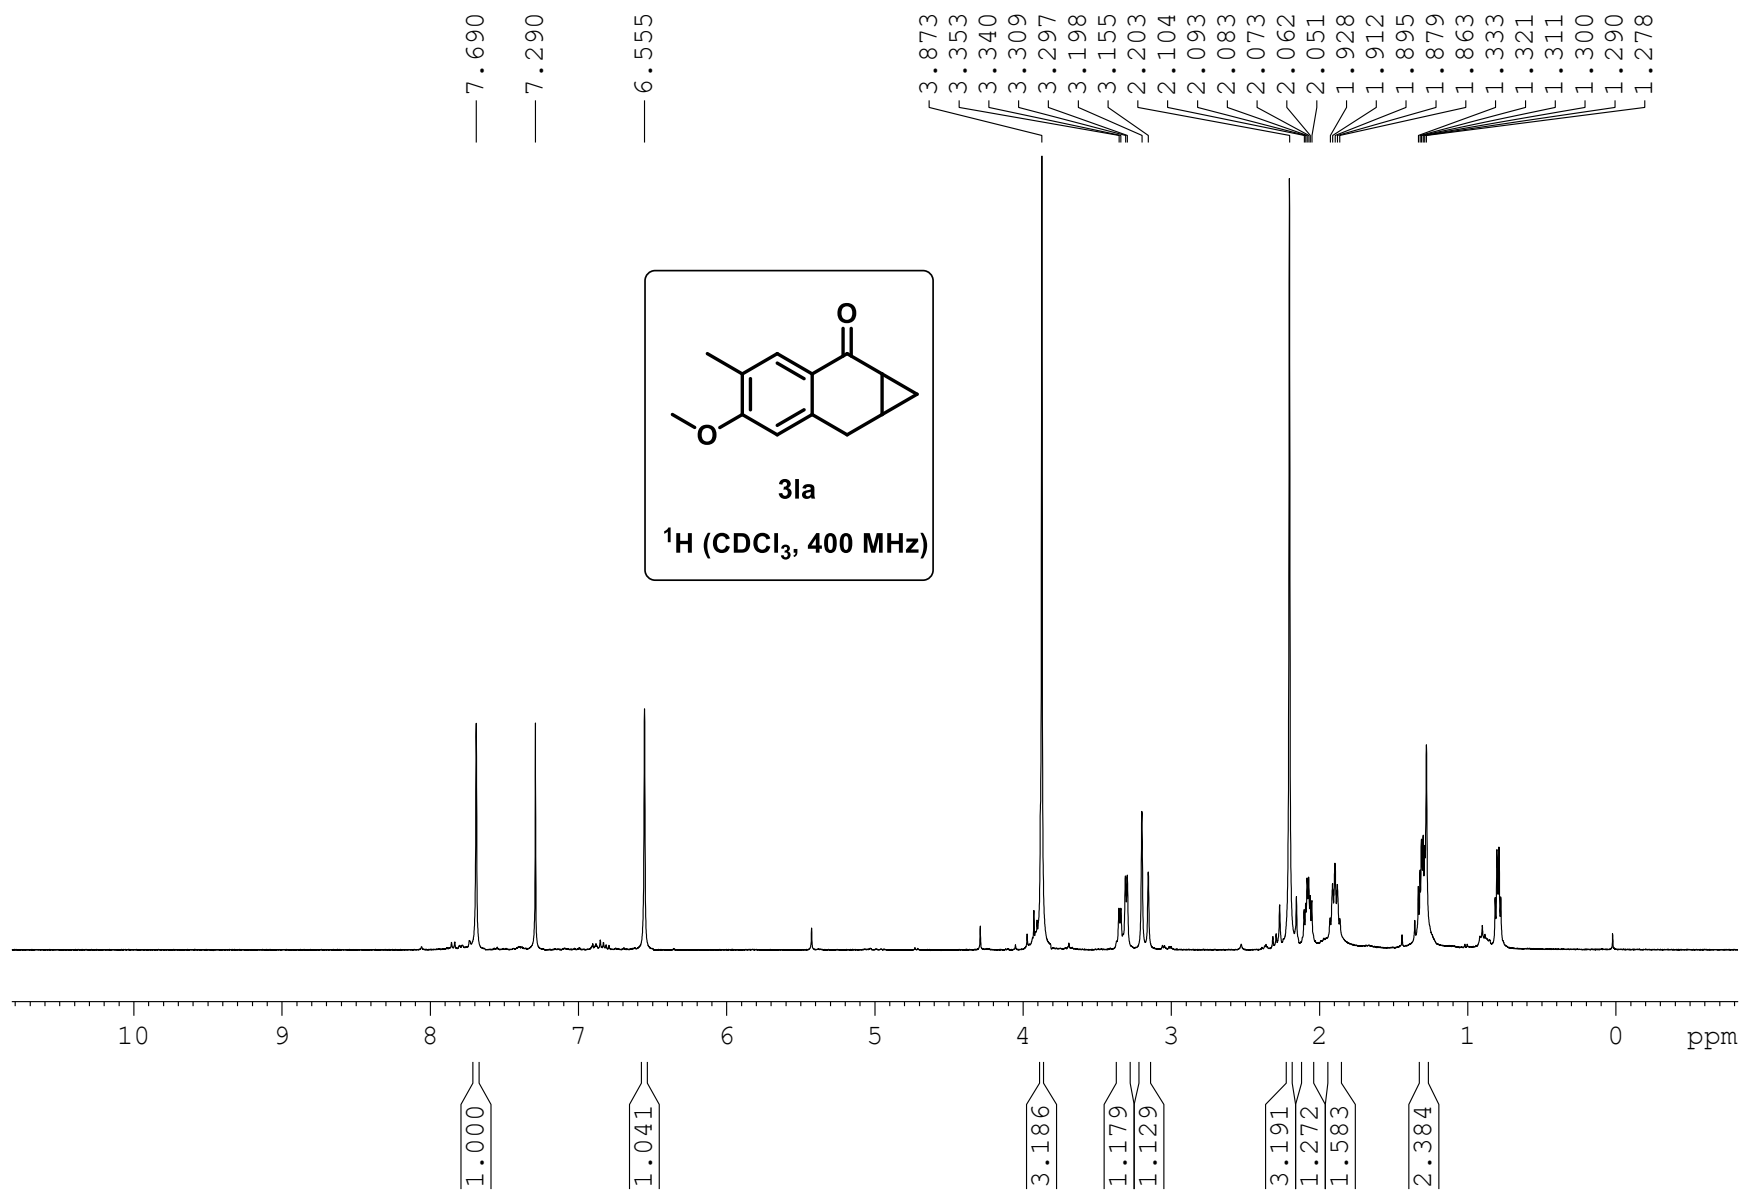

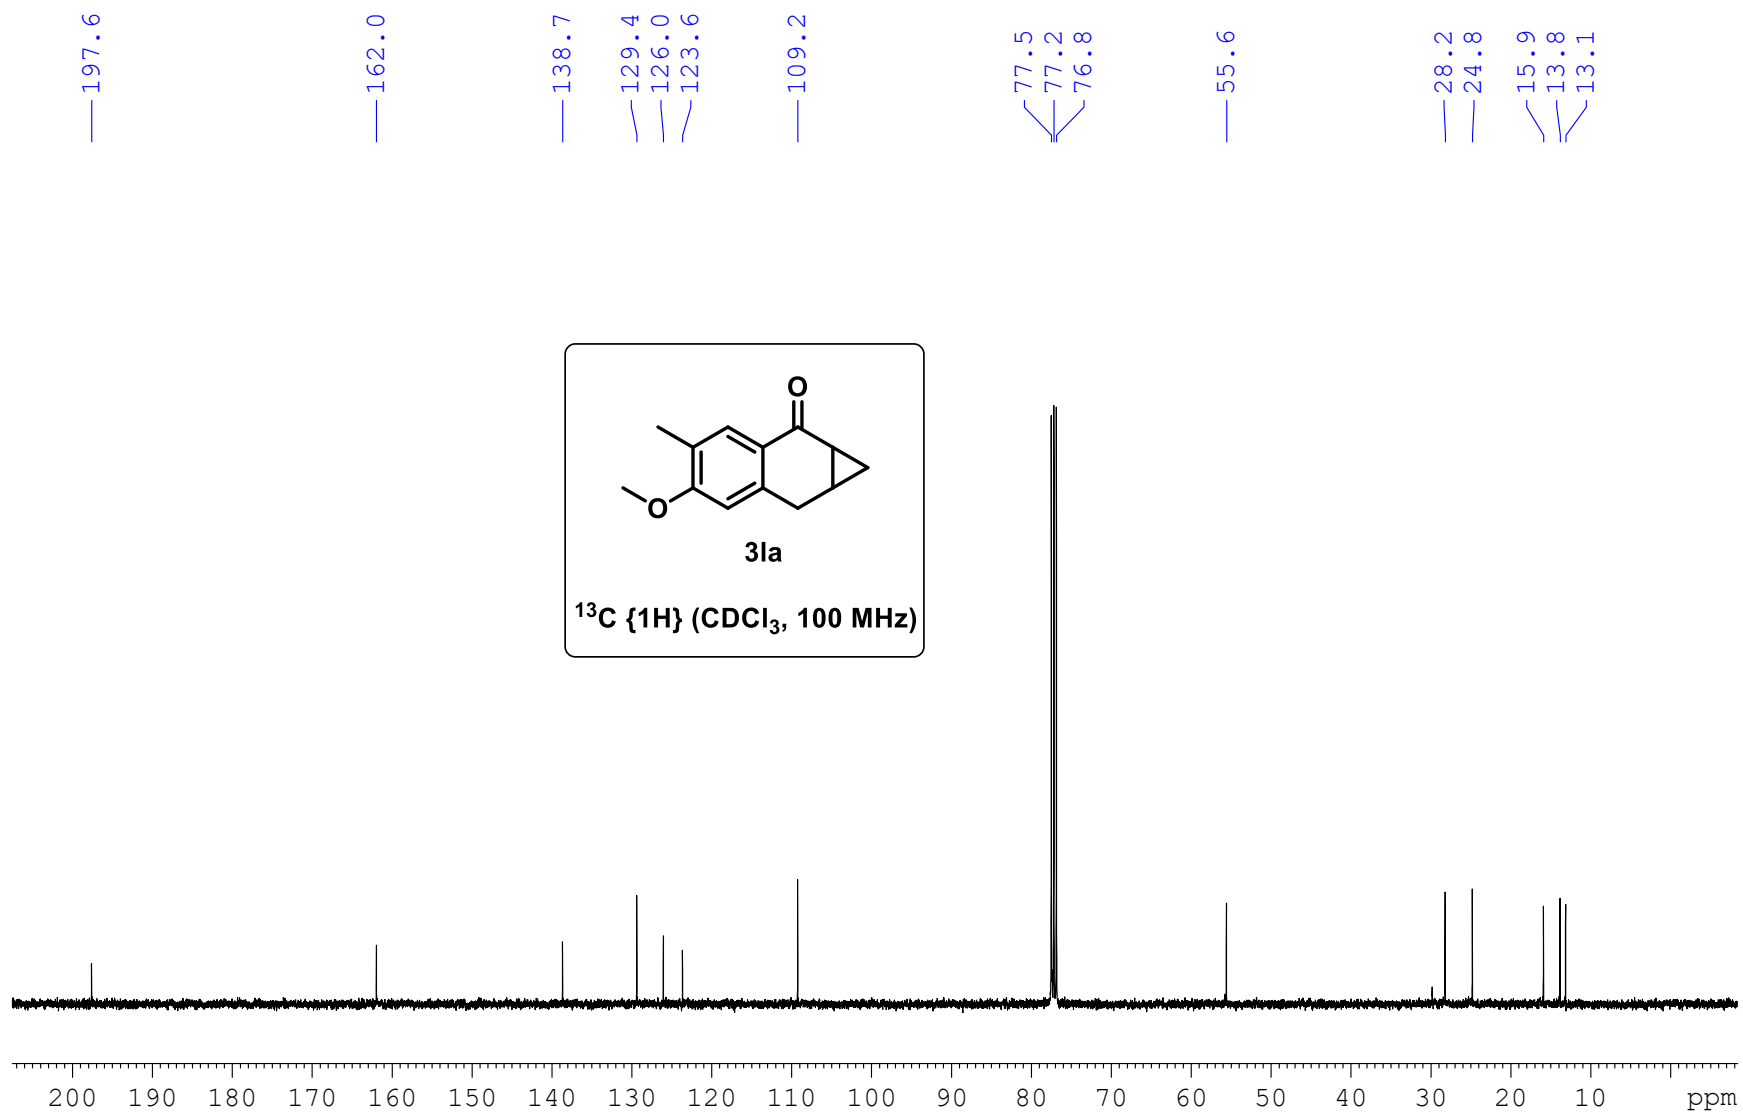

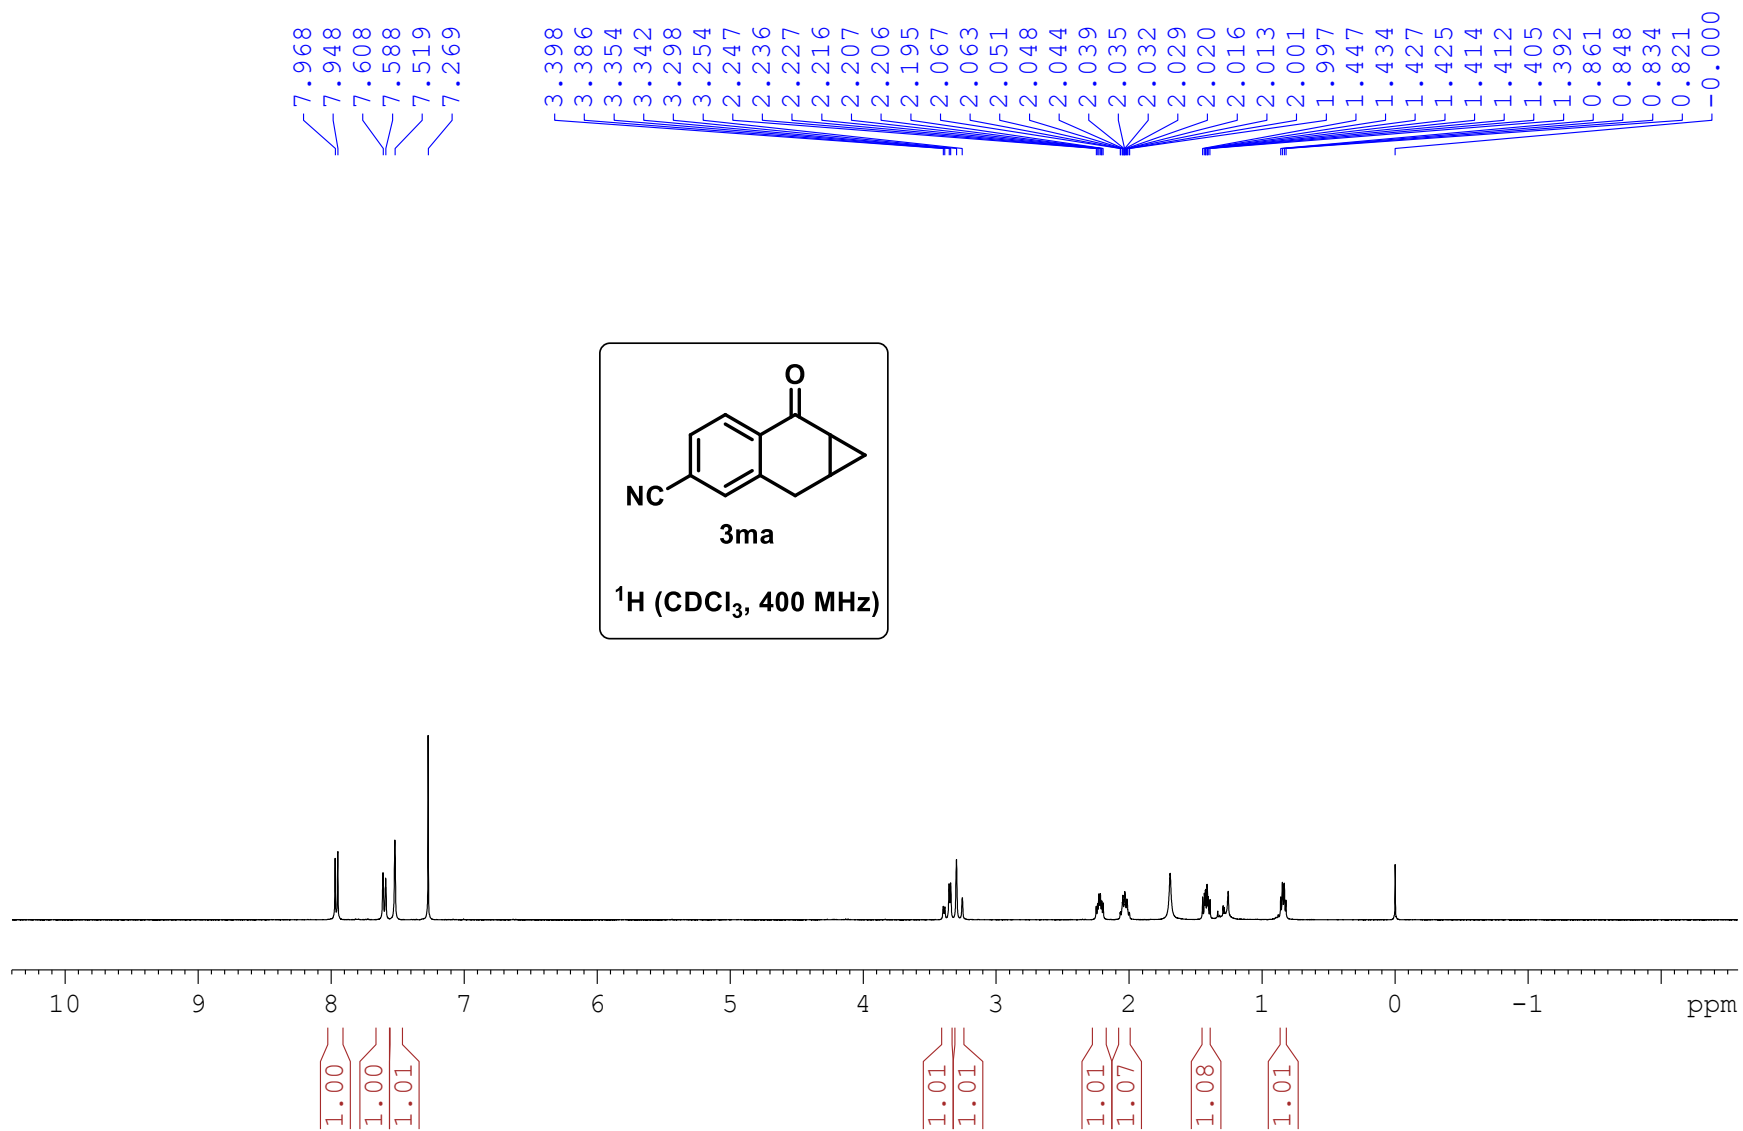

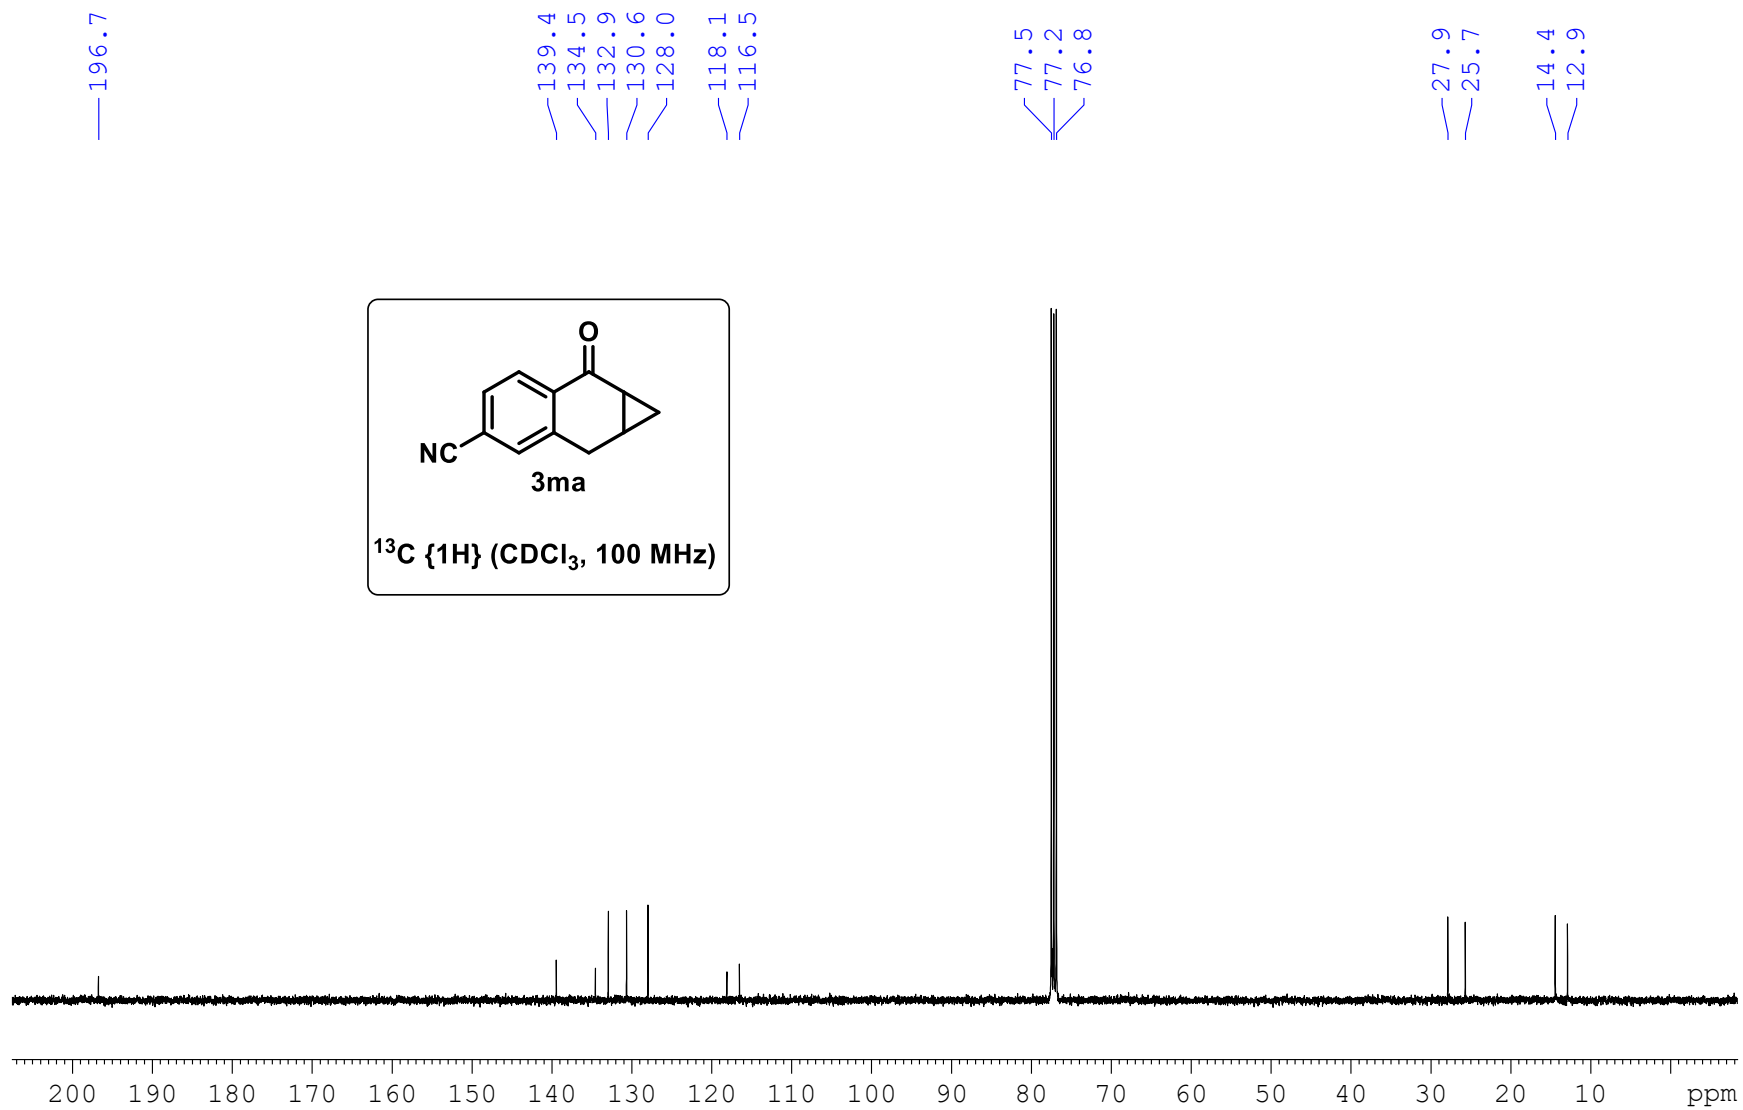



7.989  
7.969  
7.573  
7.552  
7.461  
7.267

3.418  
3.406  
3.373  
3.361  
3.317  
3.273  
2.233  
2.222  
2.213  
2.203  
2.193  
2.192  
2.182  
2.181  
2.052  
2.048  
2.036  
2.033  
2.029  
2.020  
2.017  
2.013  
2.004  
2.001  
1.985  
1.982  
1.423  
1.418  
1.410  
1.401  
1.388  
1.381  
1.368  
1.869  
0.856  
0.842  
0.830  
0.000

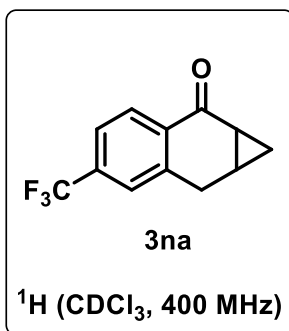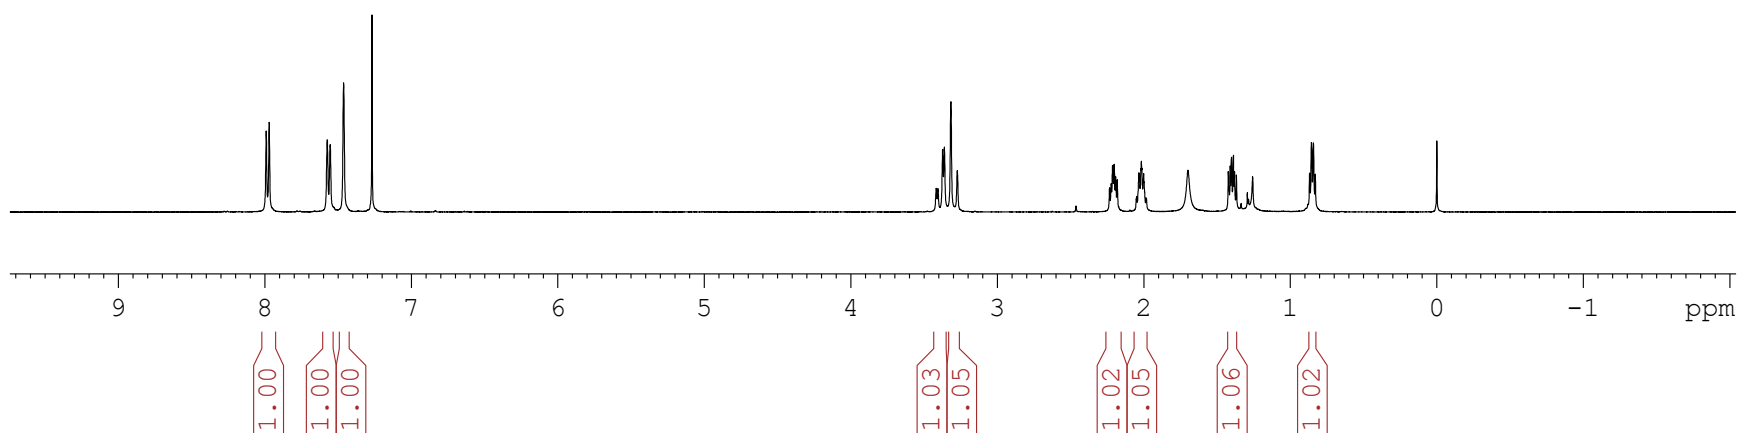

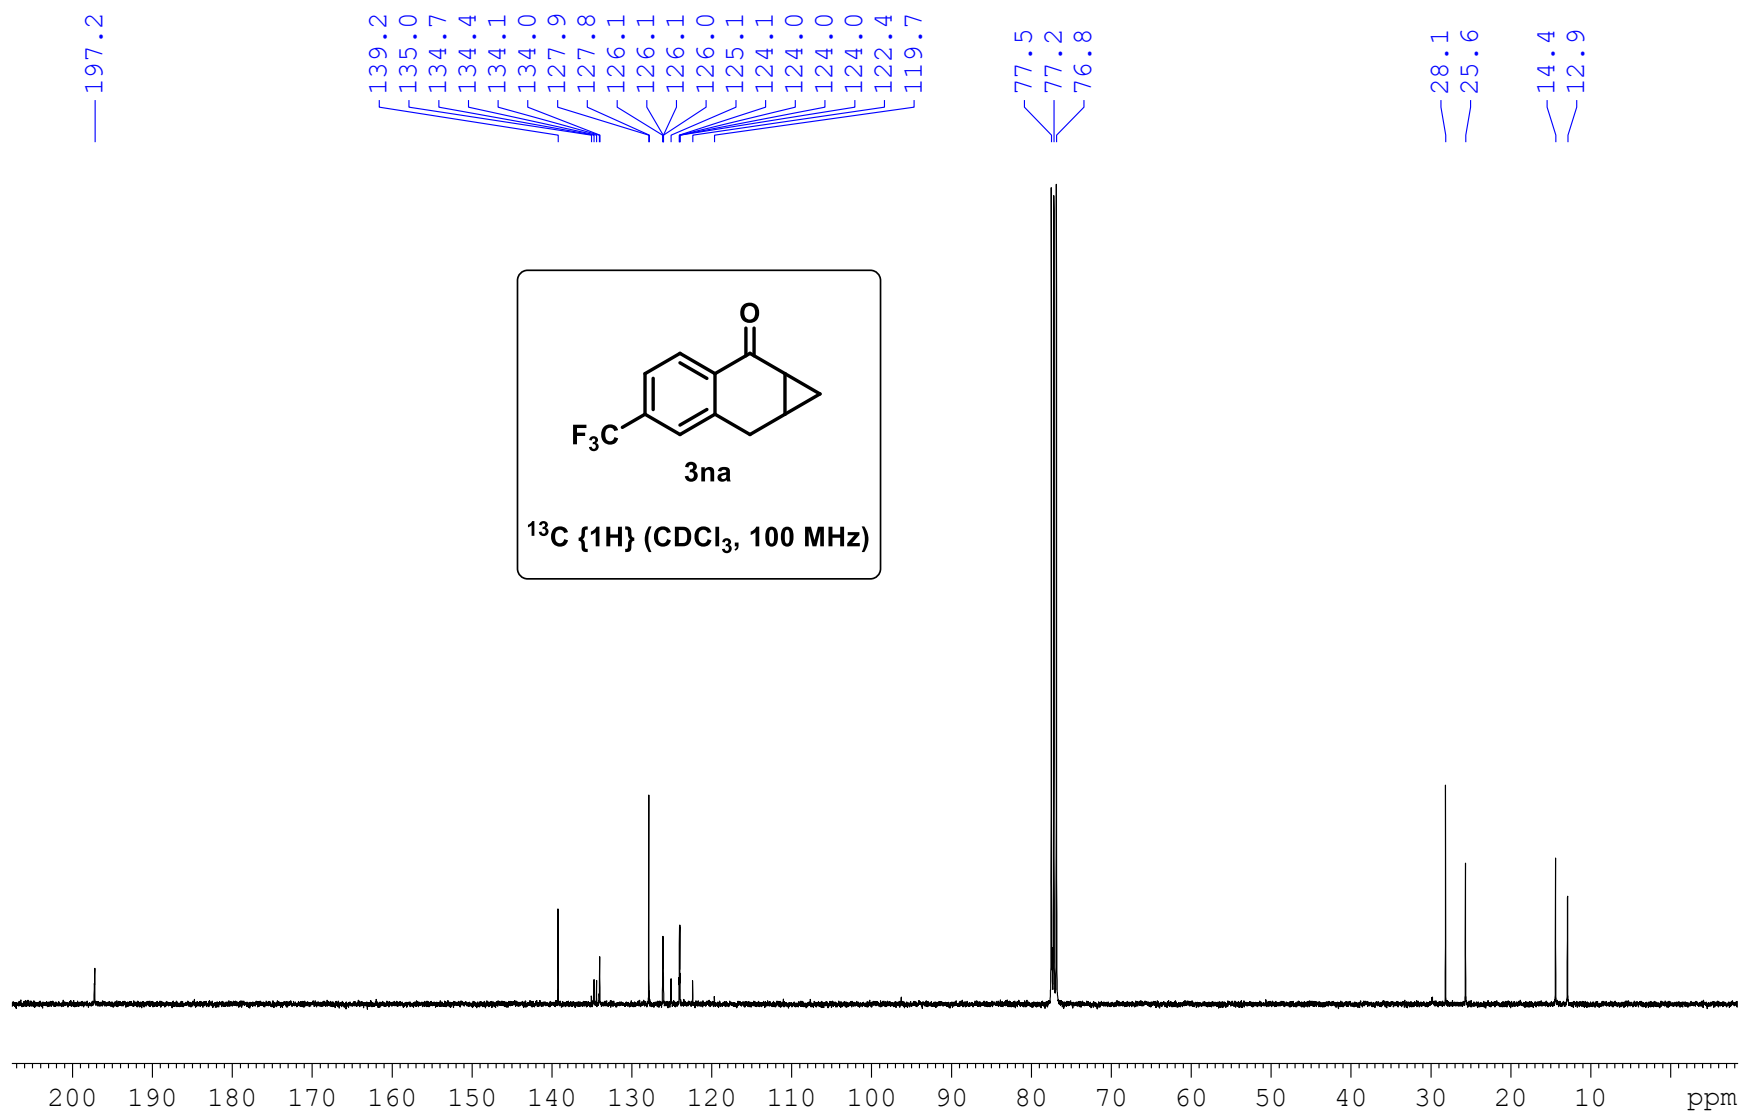

—63.2

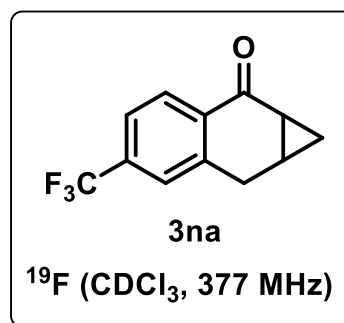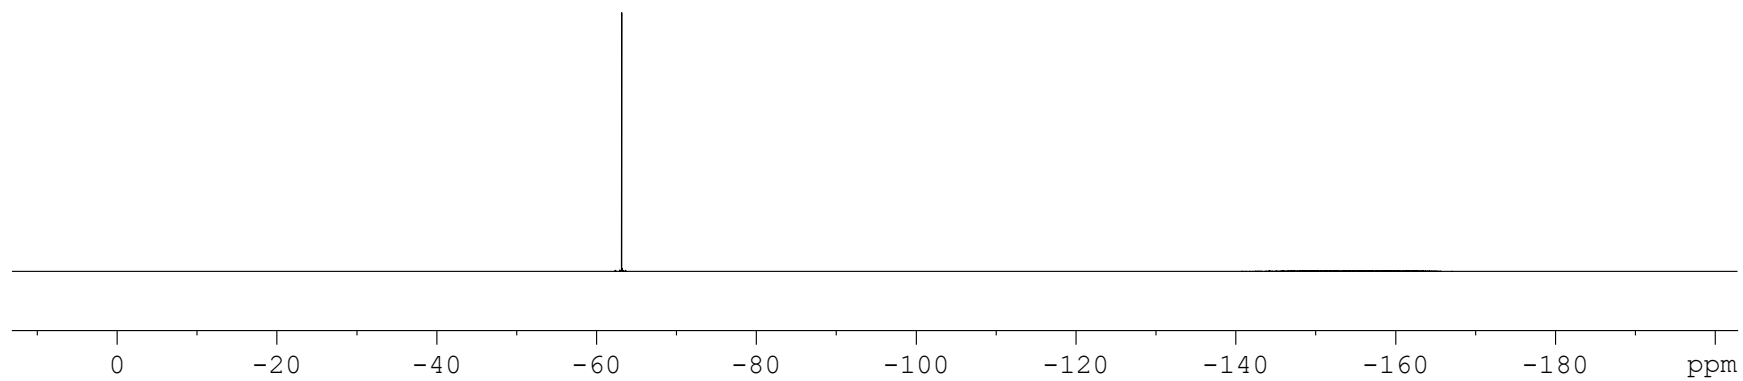

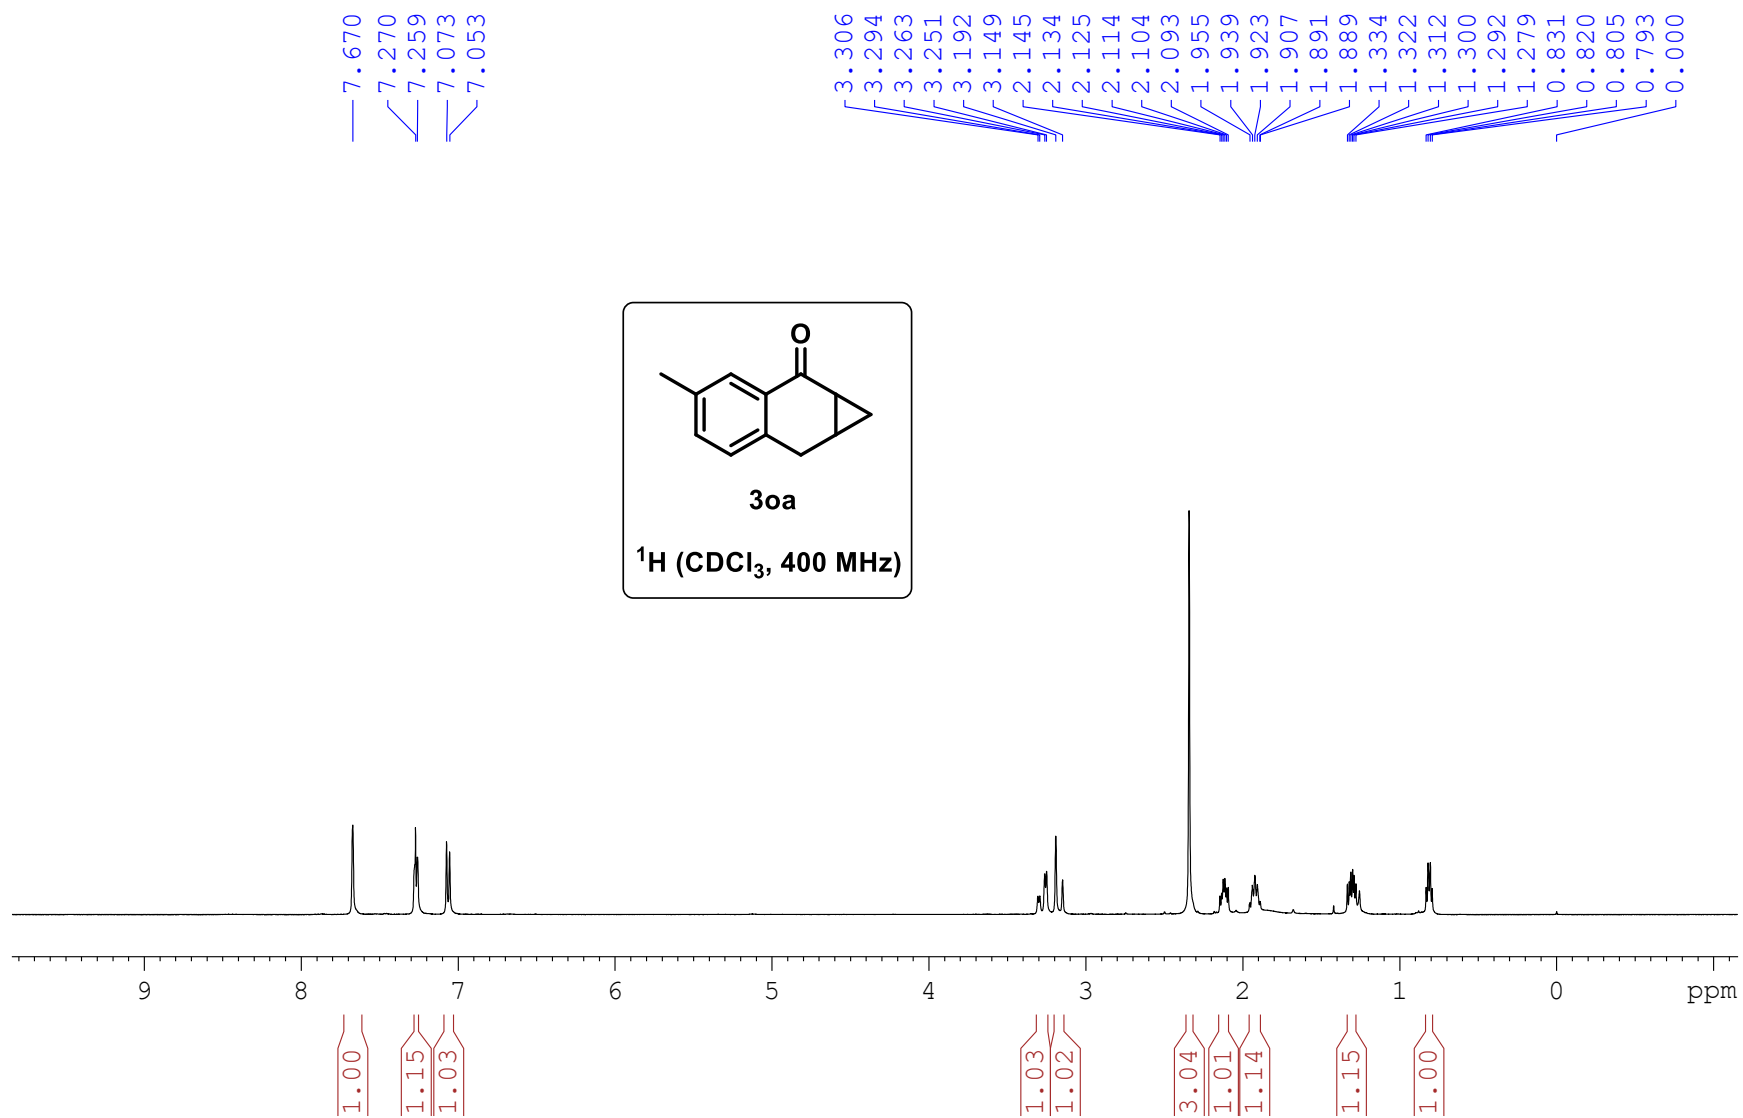

— 198.8

136.9  
135.7  
134.1  
131.0  
128.9  
127.2

77.5  
77.2  
76.8

27.7  
25.5  
21.0  
14.2  
13.0

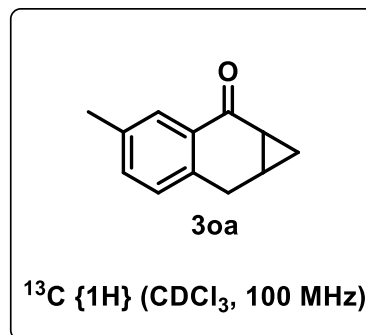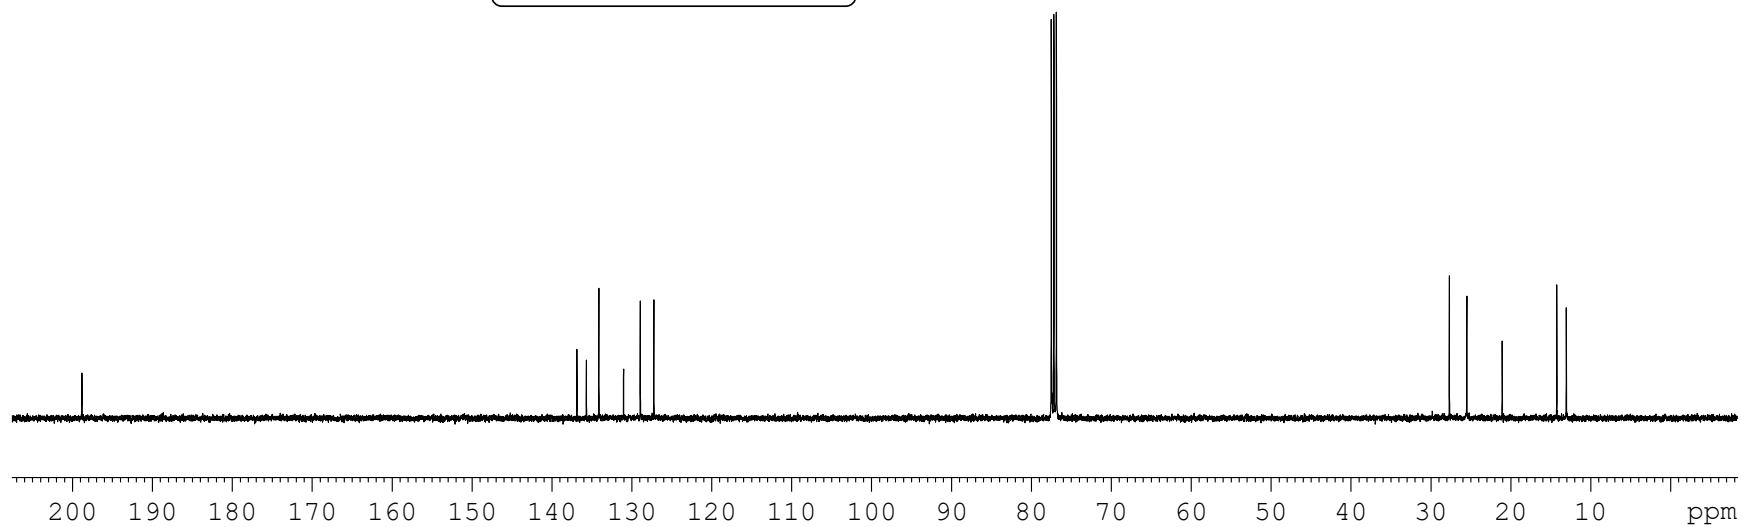

8.157  
7.703  
7.700  
7.683  
7.680  
7.333  
7.313  
7.266

3.410  
3.399  
3.366  
3.354  
3.325  
3.281  
2.230  
2.219  
2.210  
2.199  
2.189  
2.179  
2.040  
2.036  
2.021  
2.017  
2.008  
2.005  
2.002  
1.993  
1.989  
1.974  
1.970  
1.422  
1.417  
1.409  
1.401  
1.400  
1.387  
1.379  
1.366  
0.859  
0.847  
0.832  
0.820  
-0.000

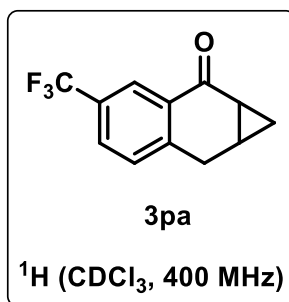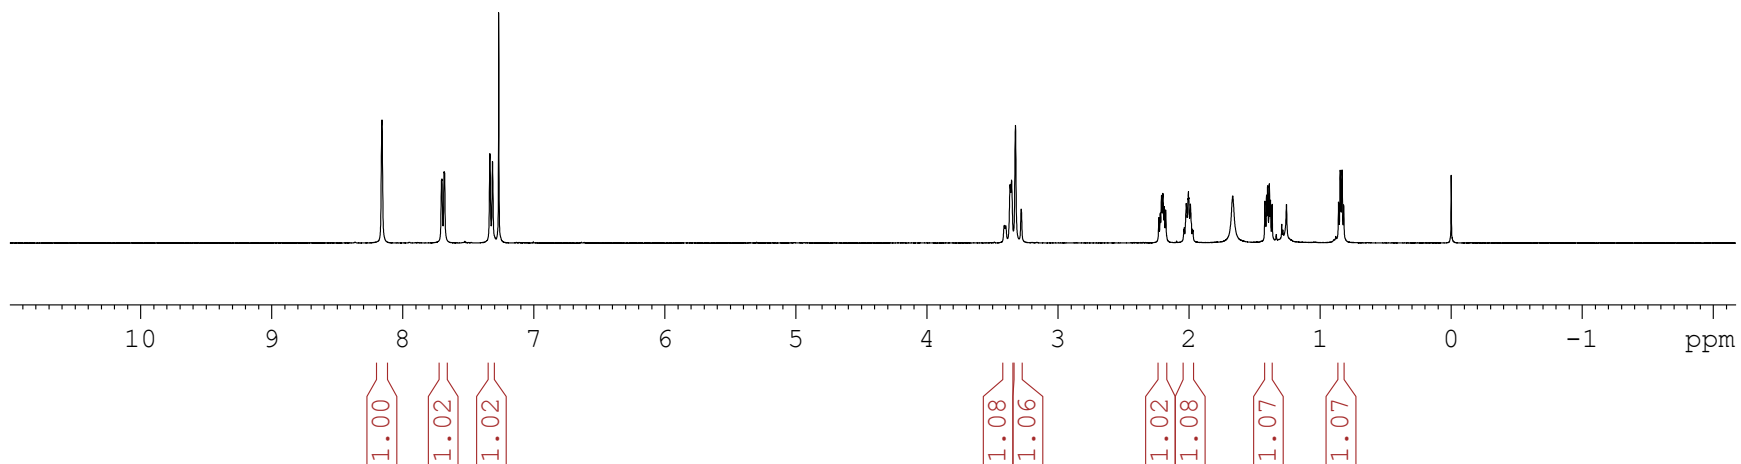

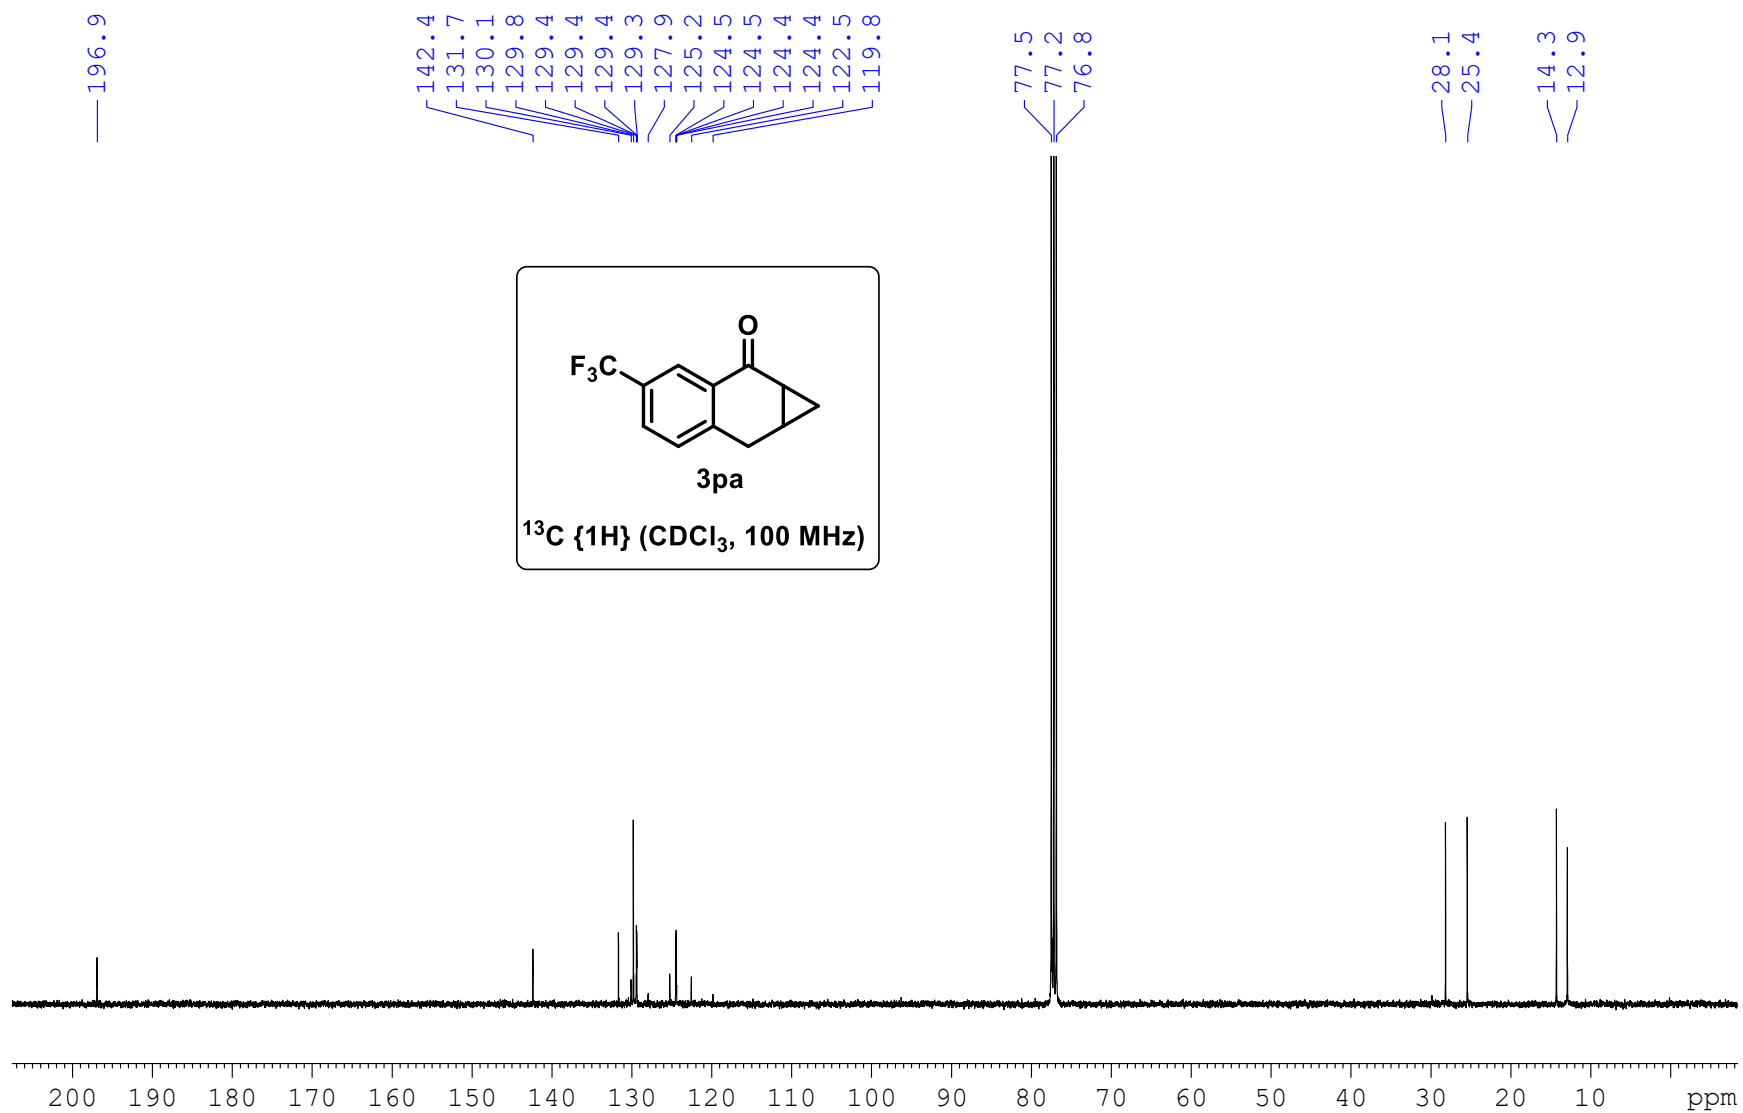

--62.7

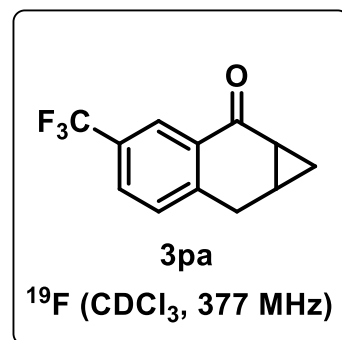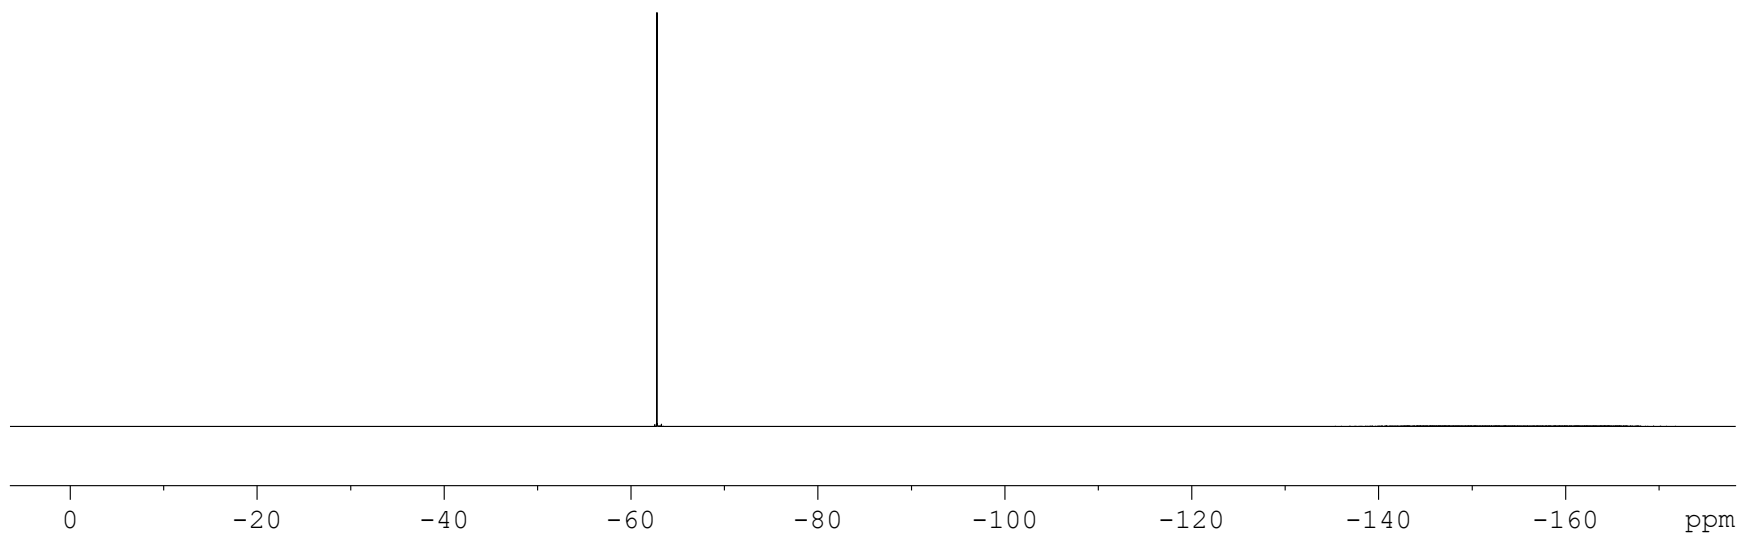



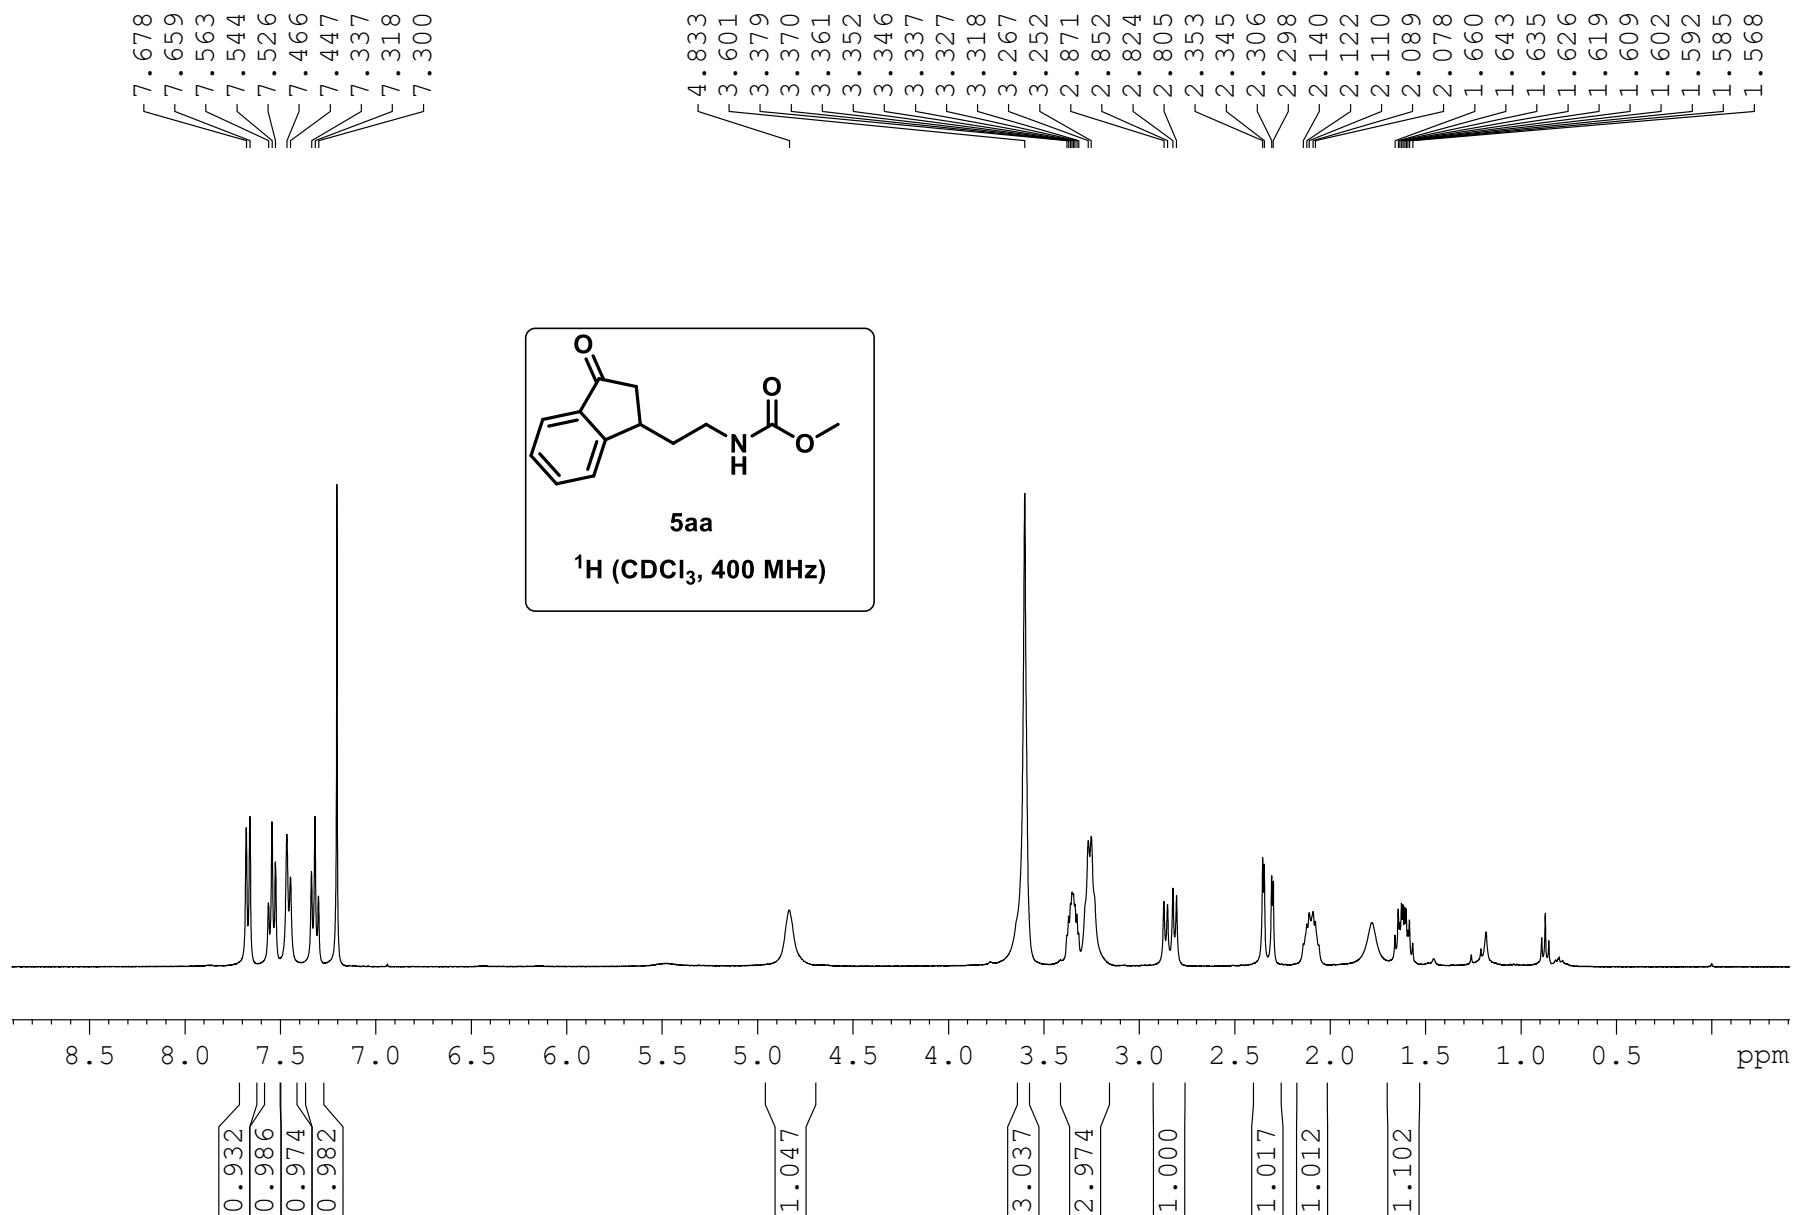

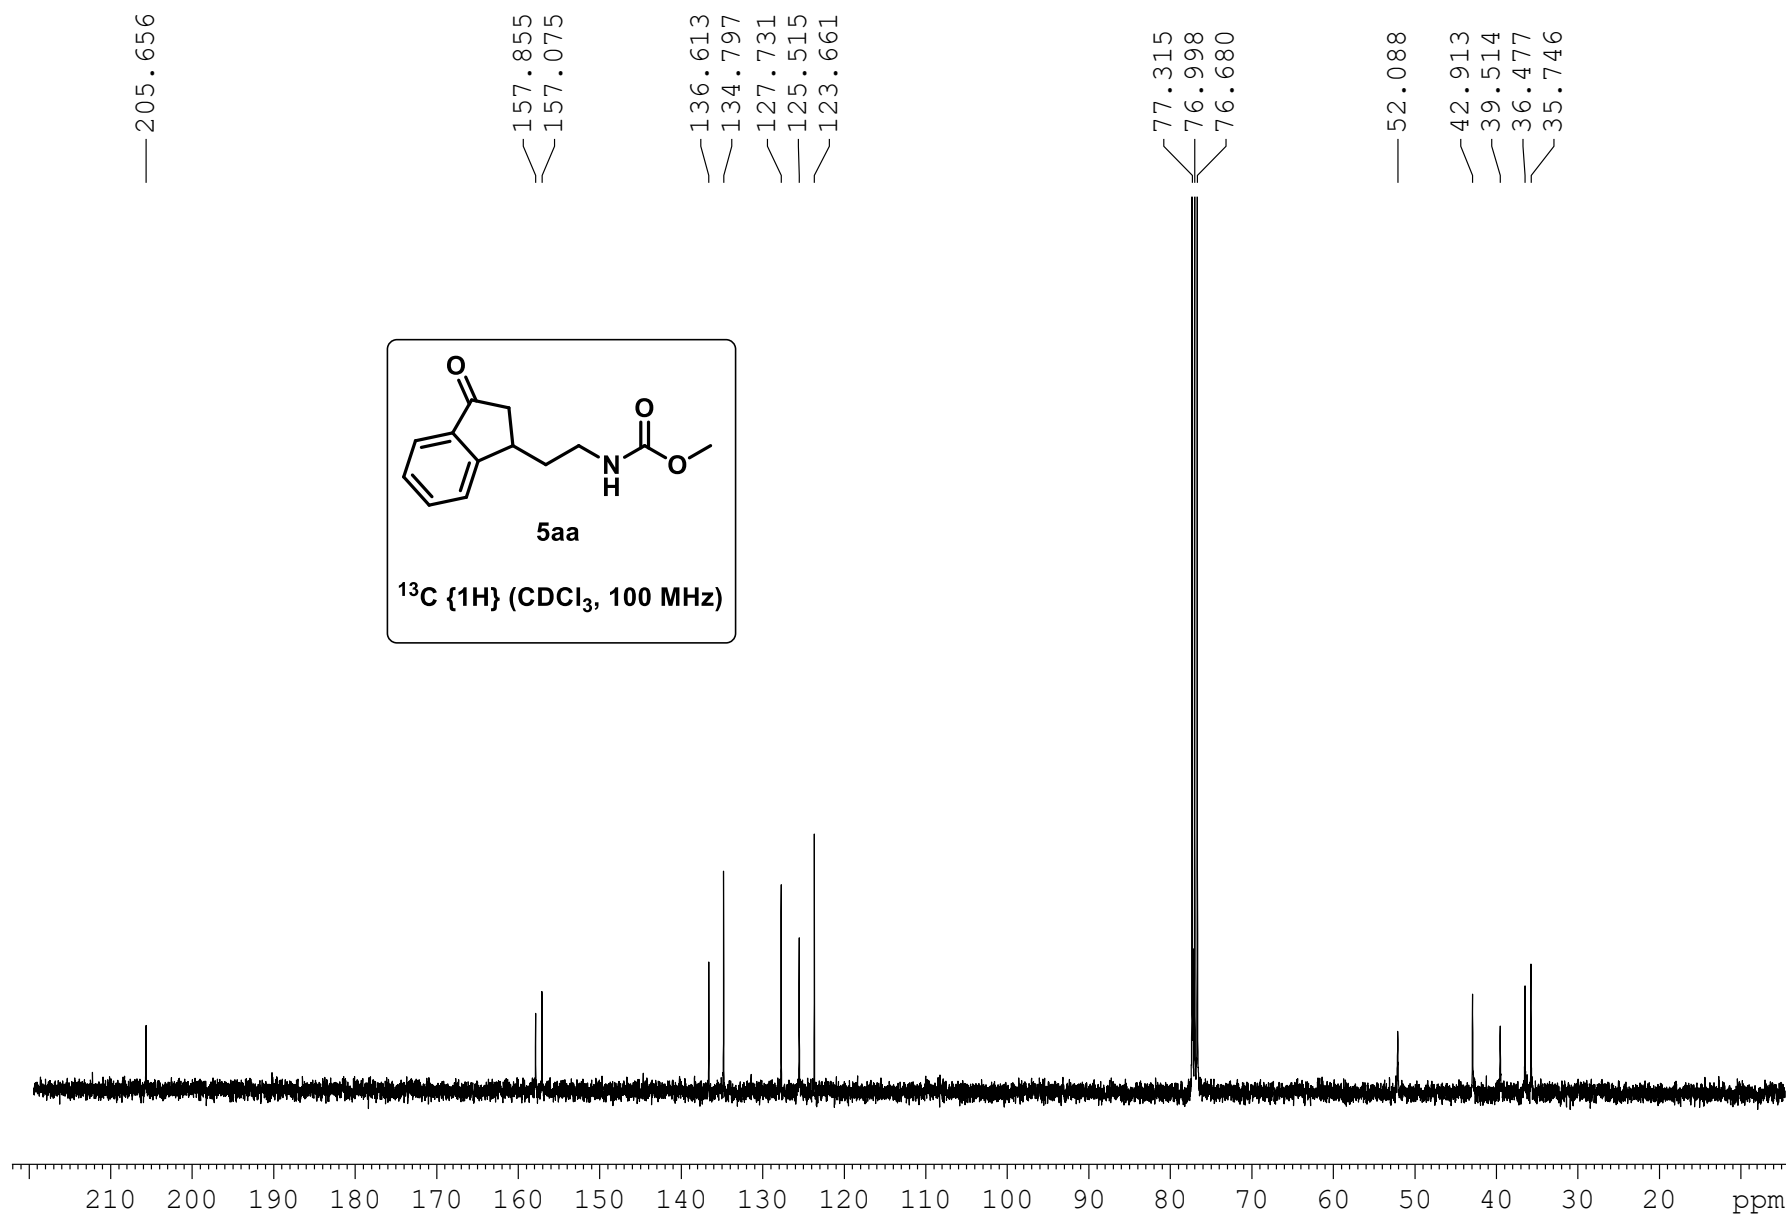

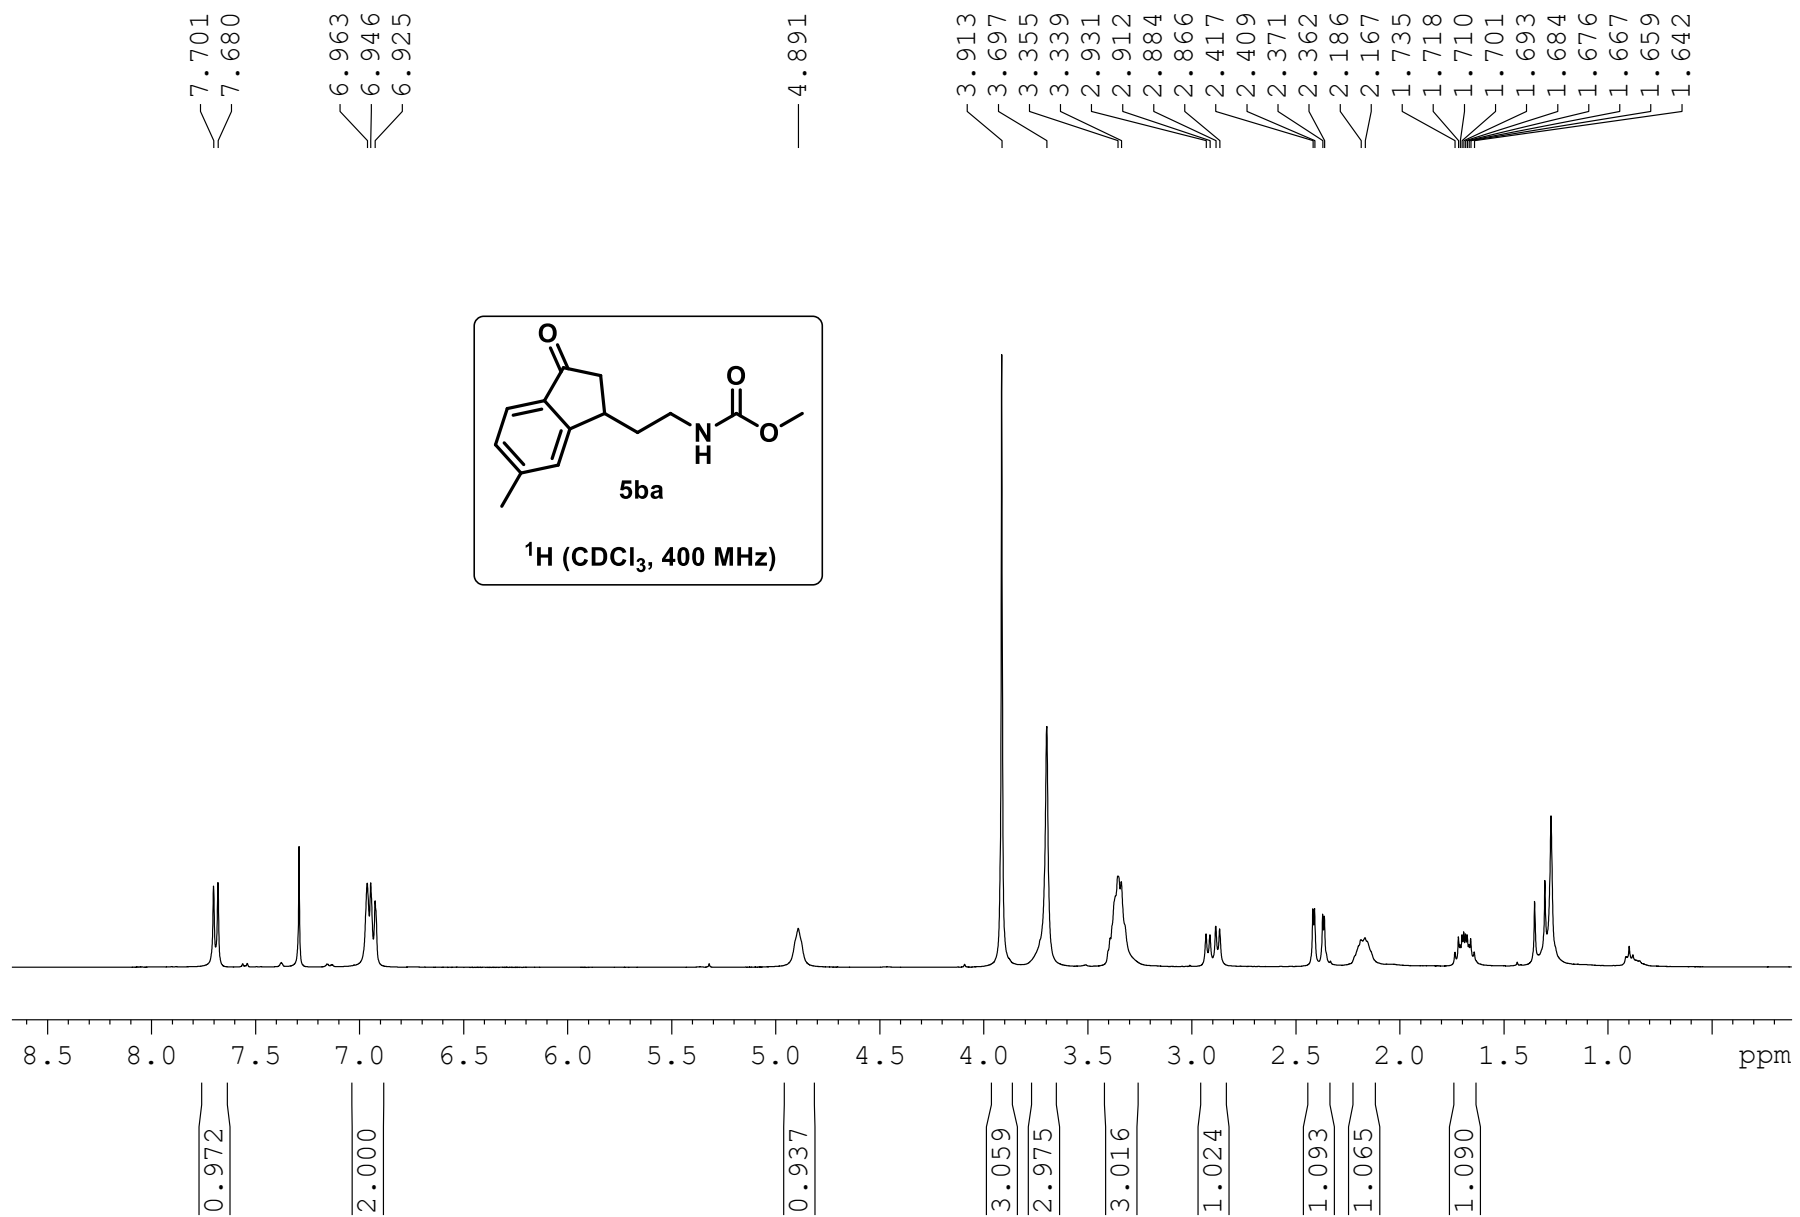

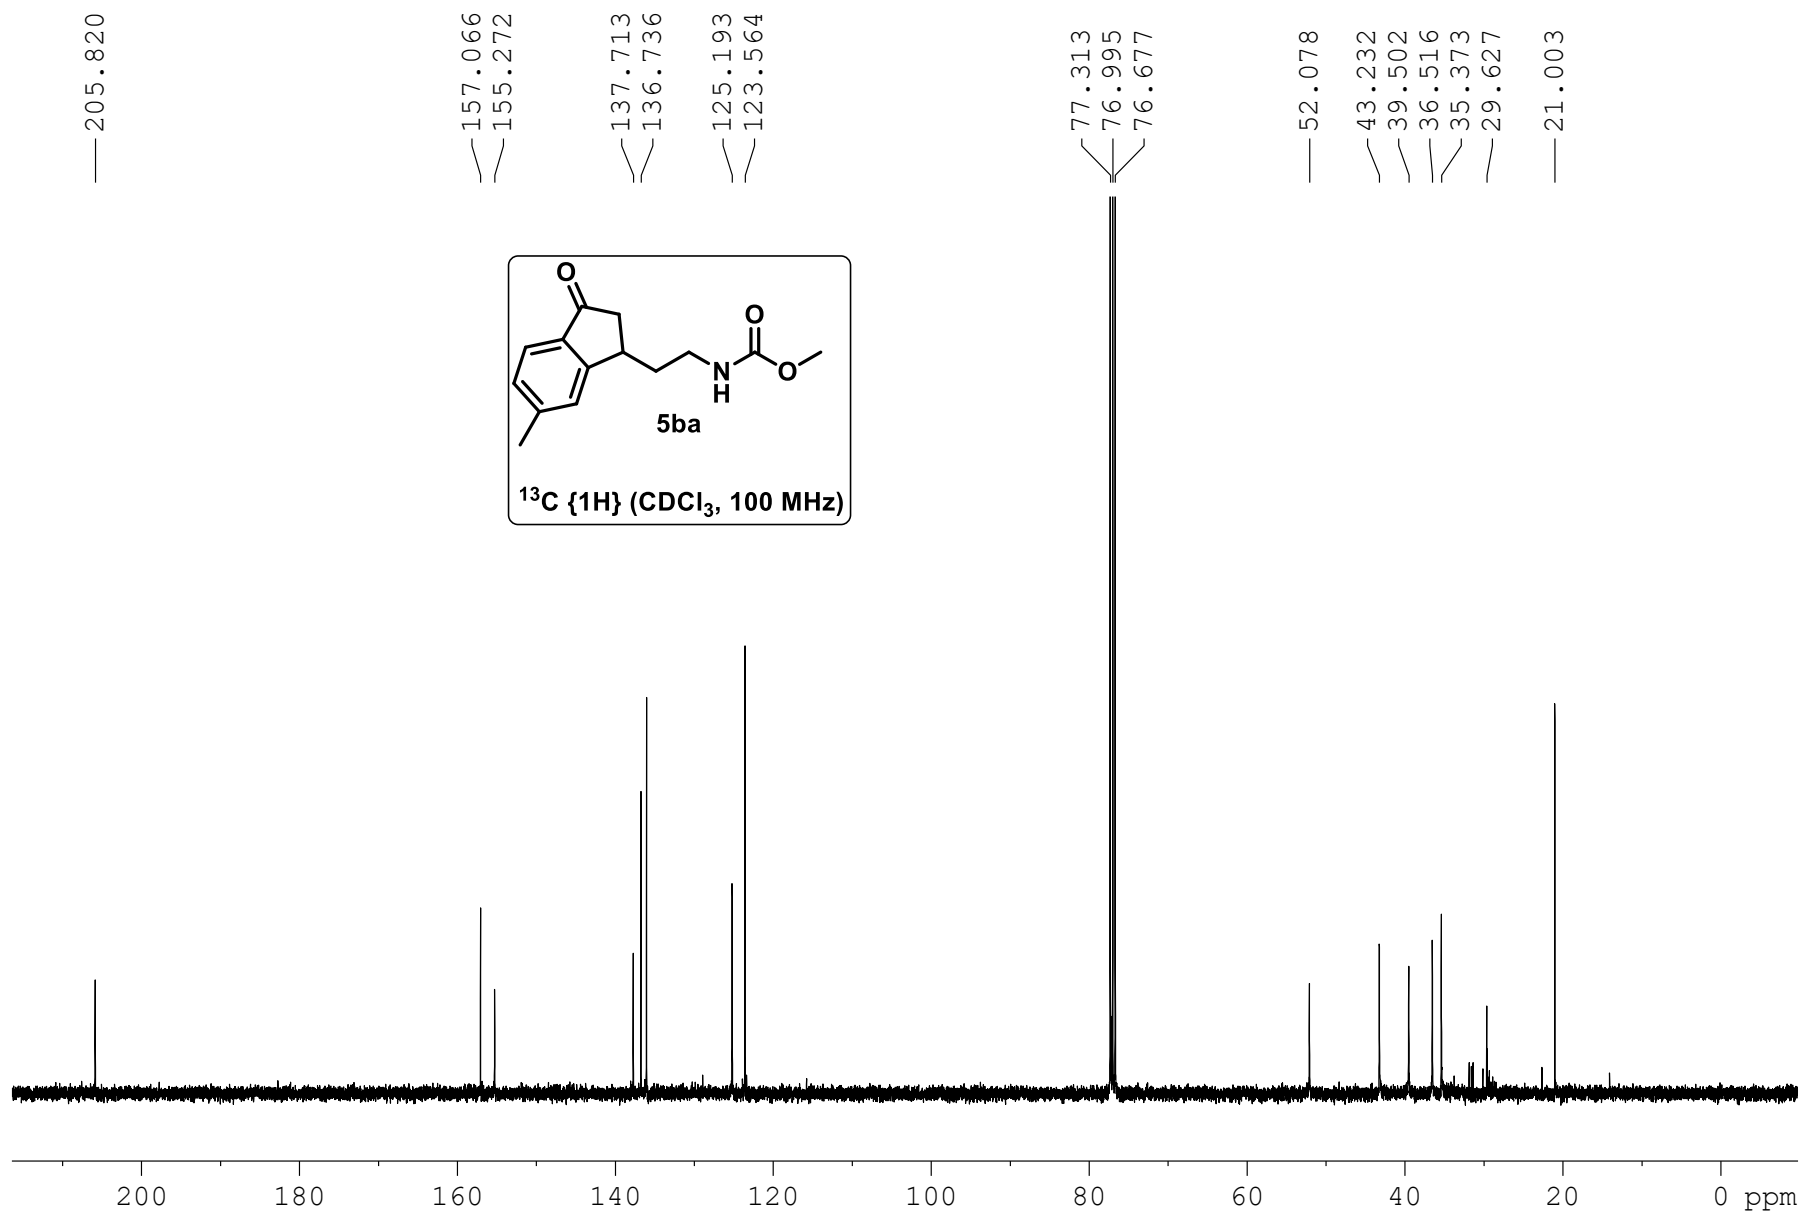

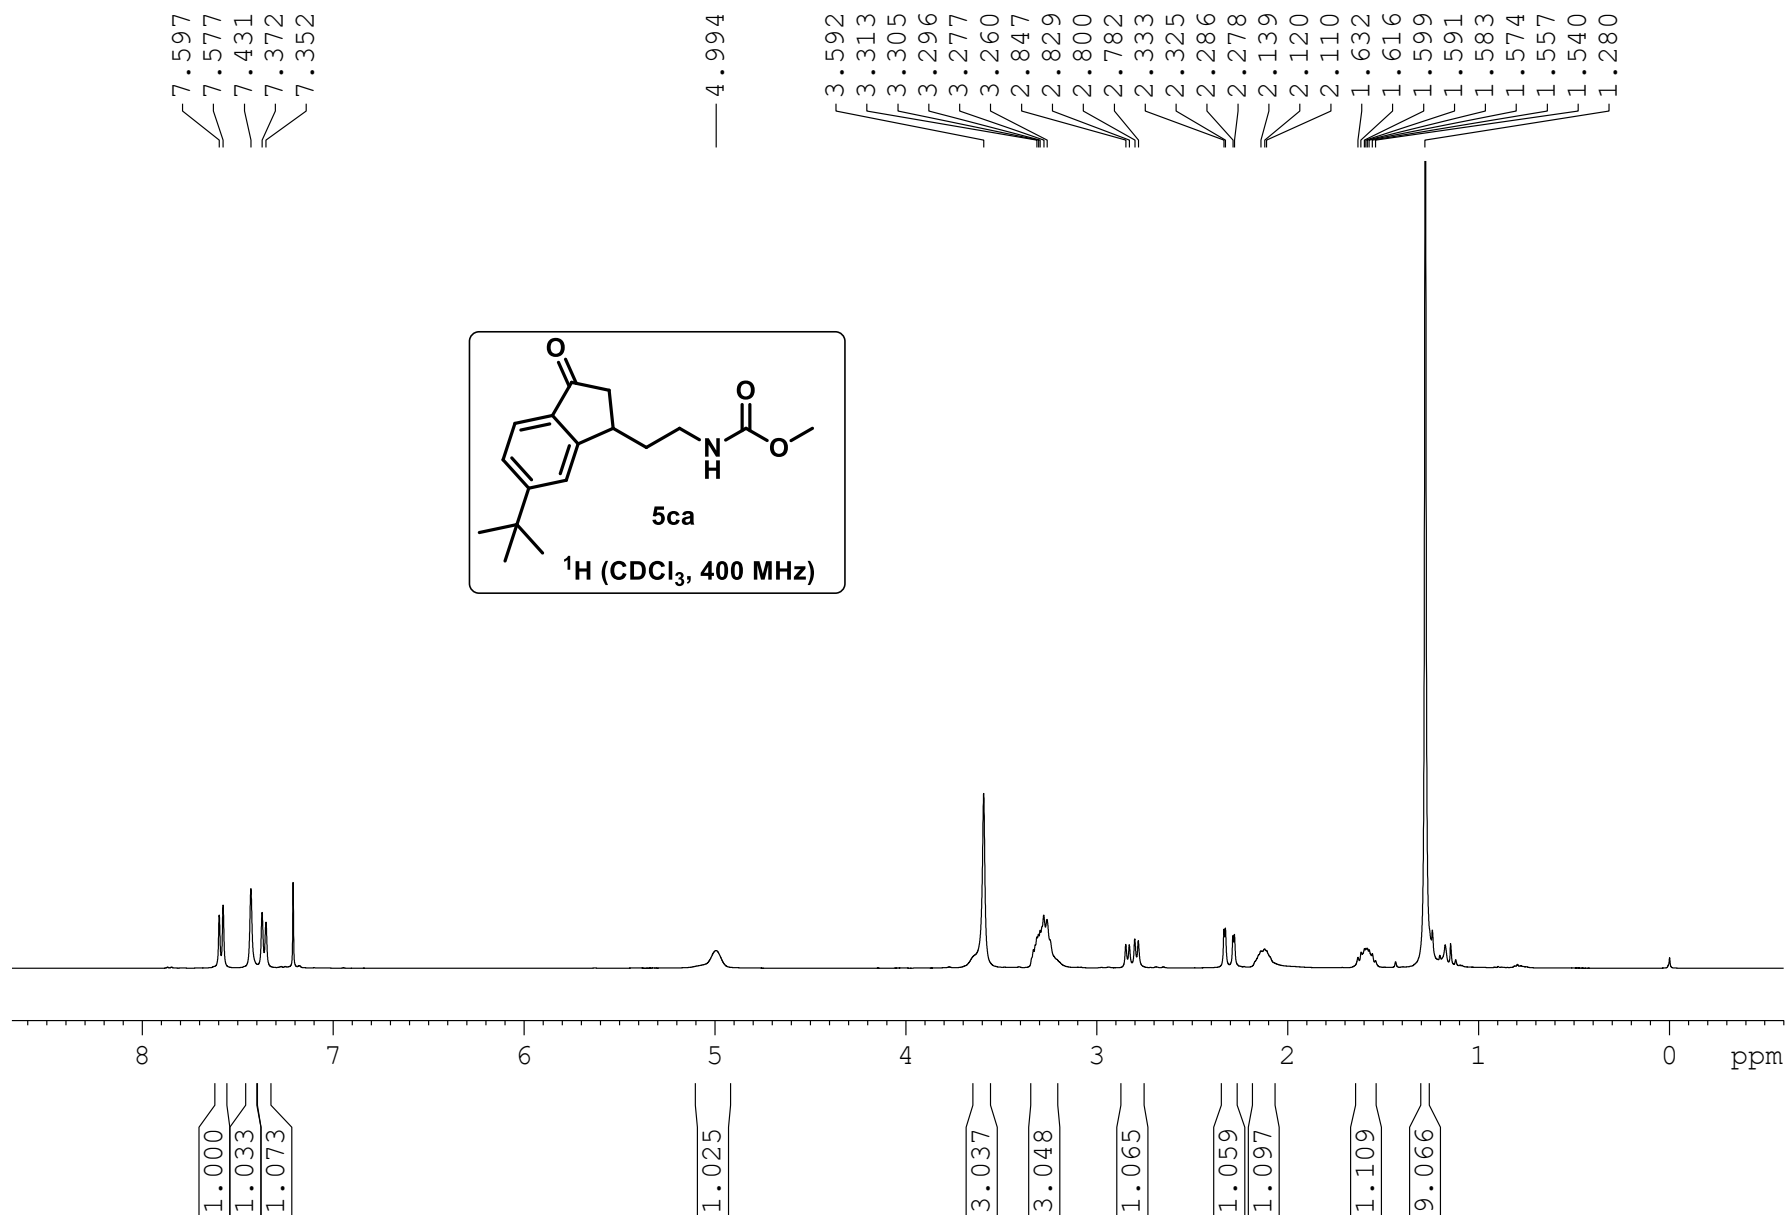

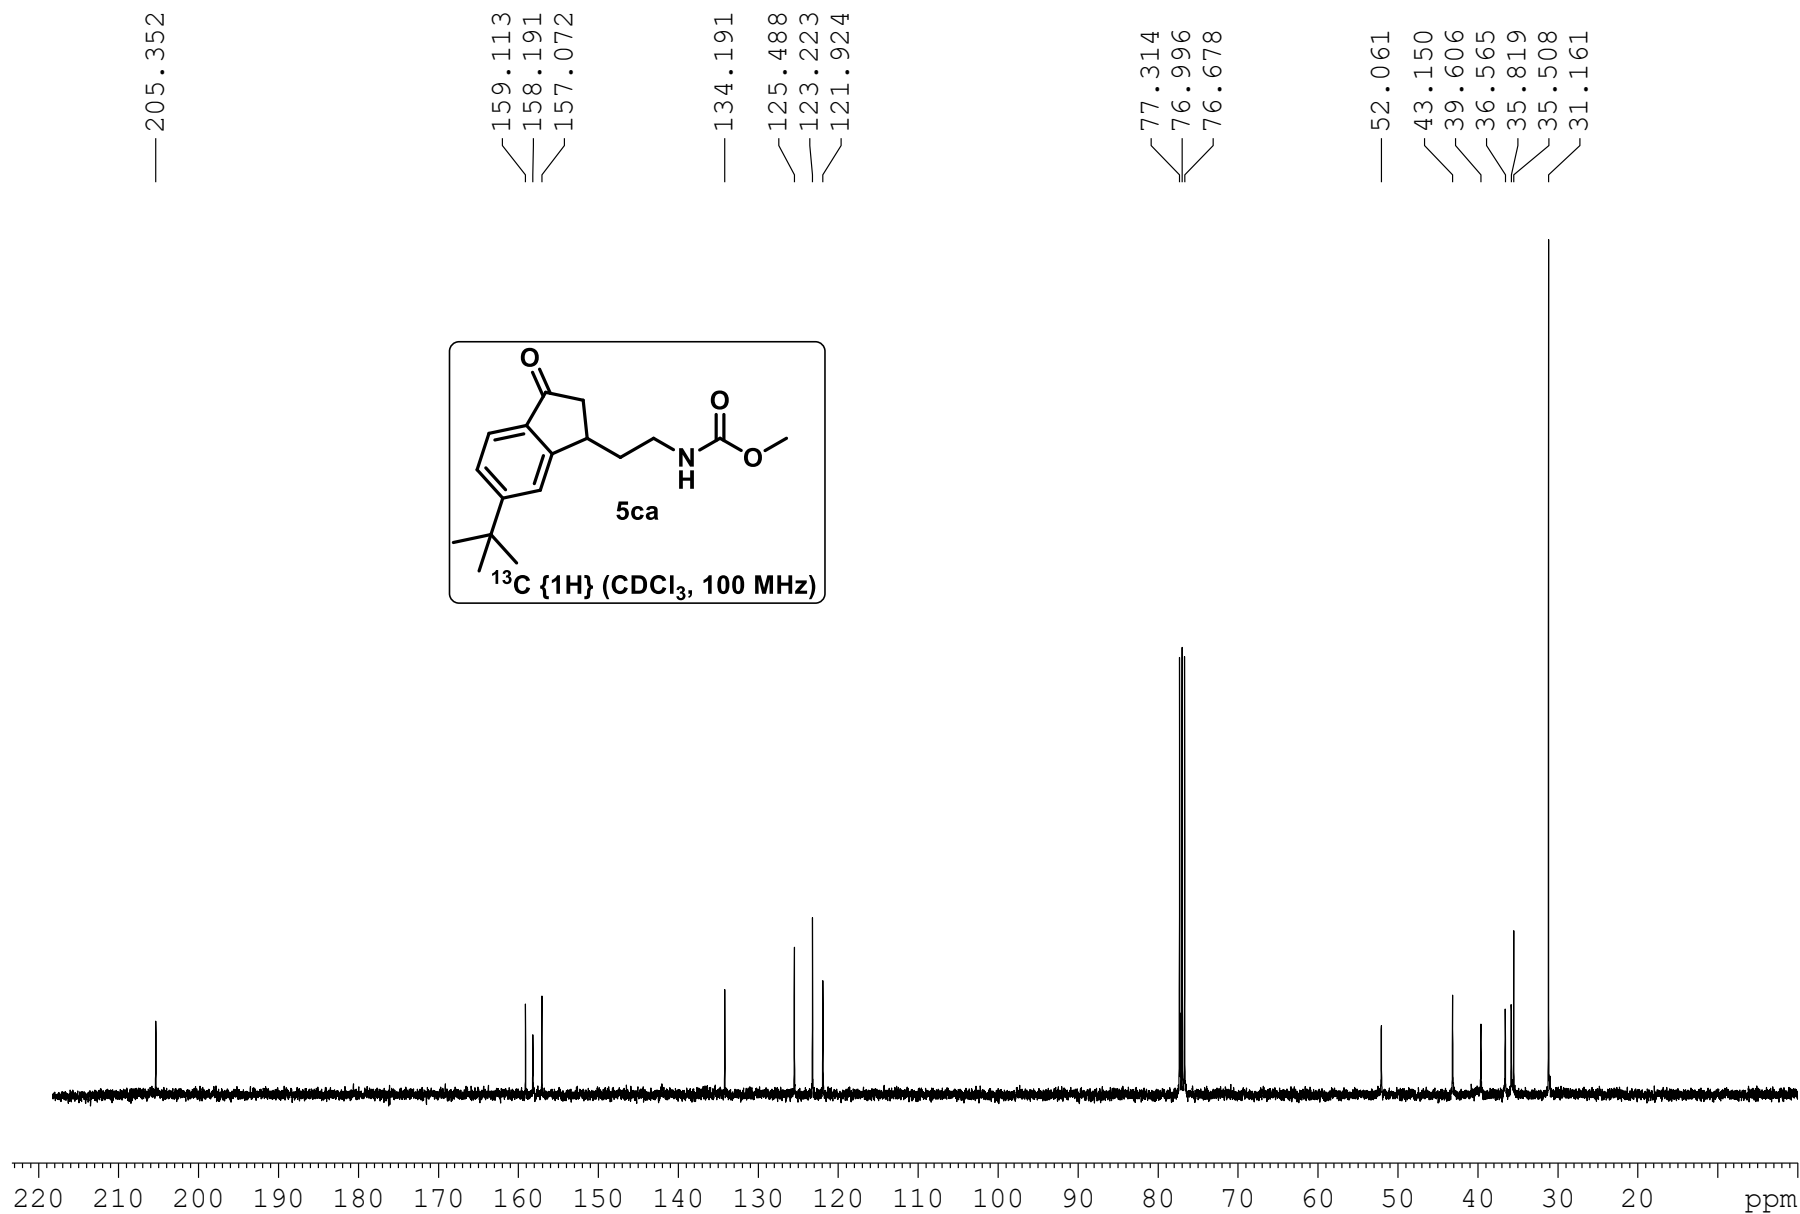

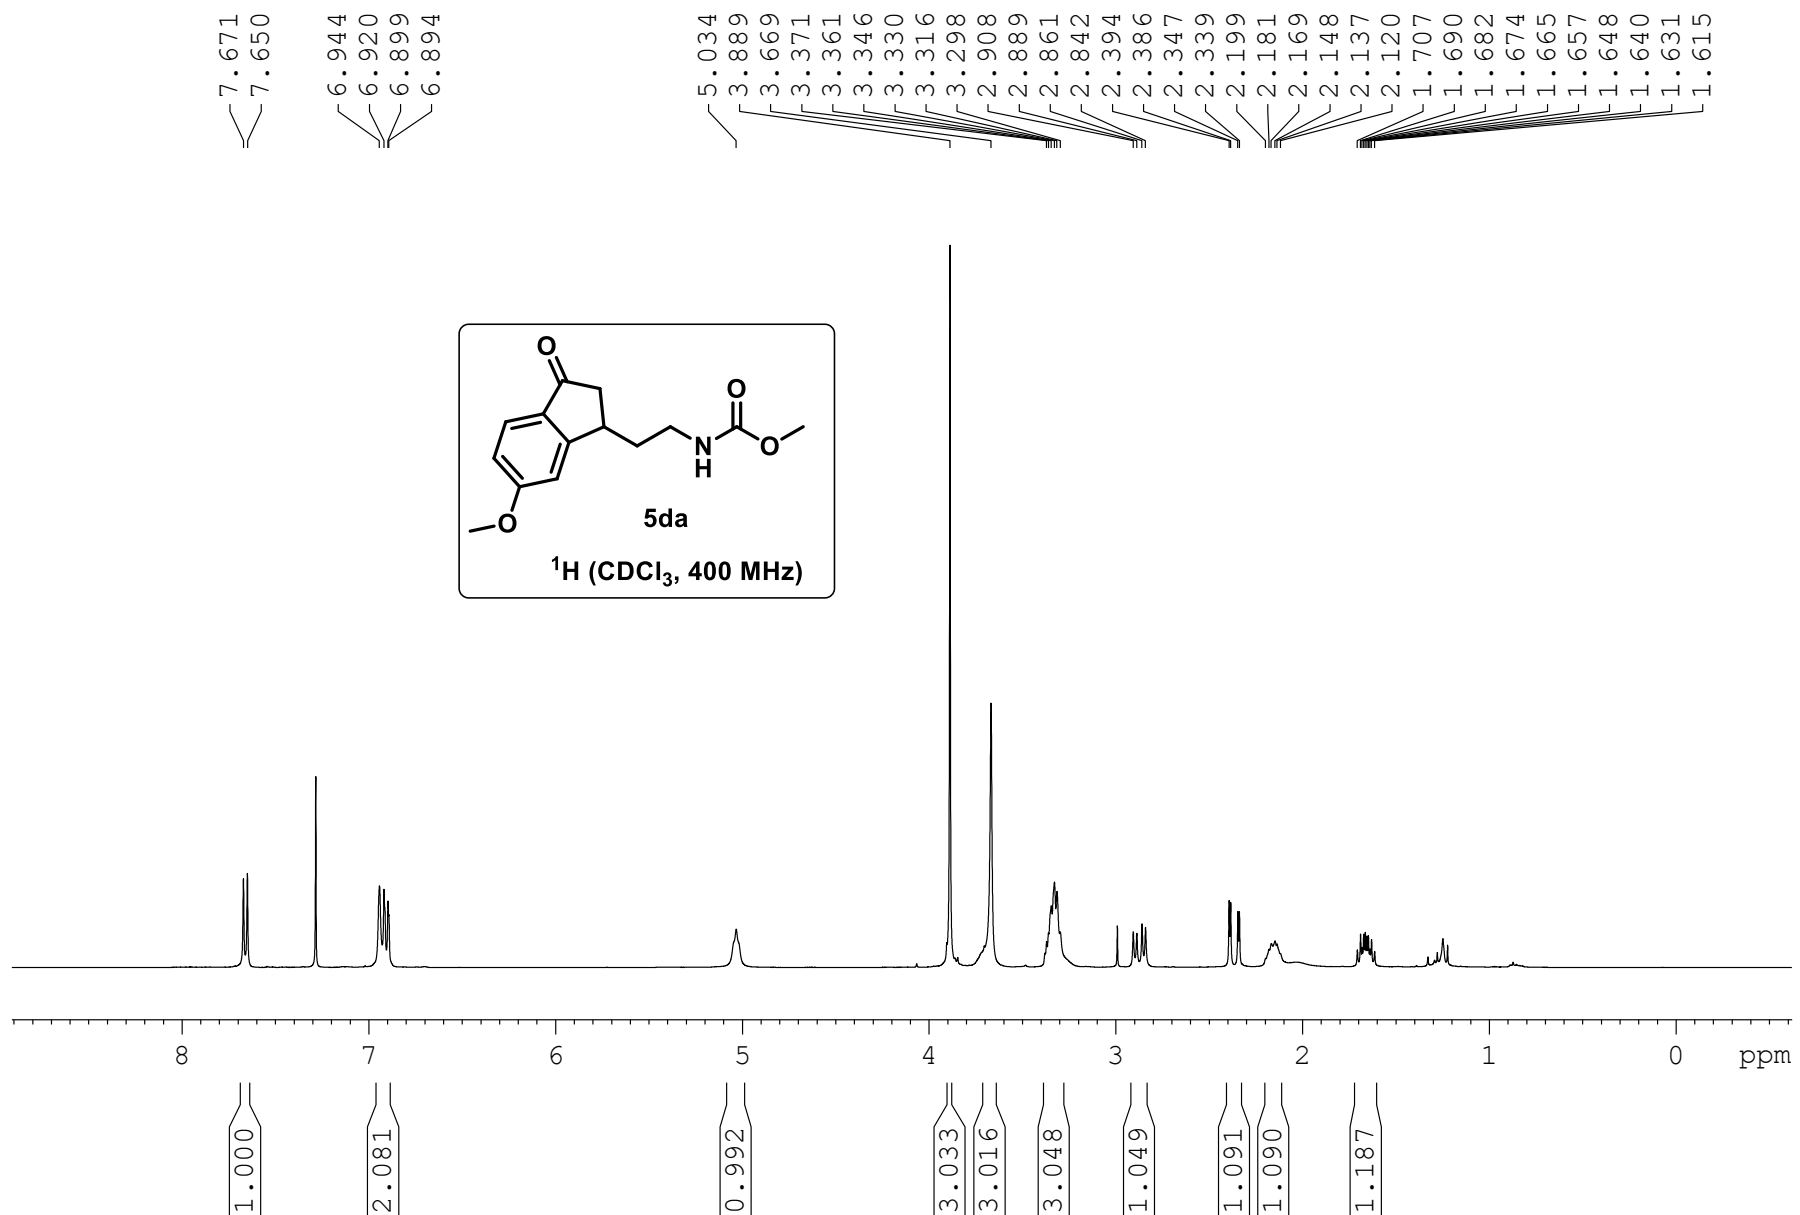

— 203.919

— 165.369  
— 160.902  
— 157.095

— 129.797  
— 125.281  
— 115.534  
— 108.781

77.313  
76.995  
76.677

— 55.641  
— 52.047

— 43.030  
— 39.406  
— 36.307  
— 35.607

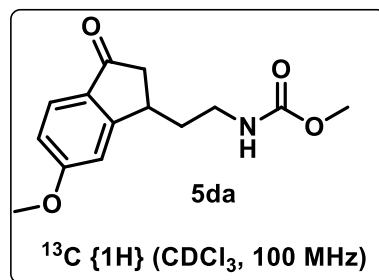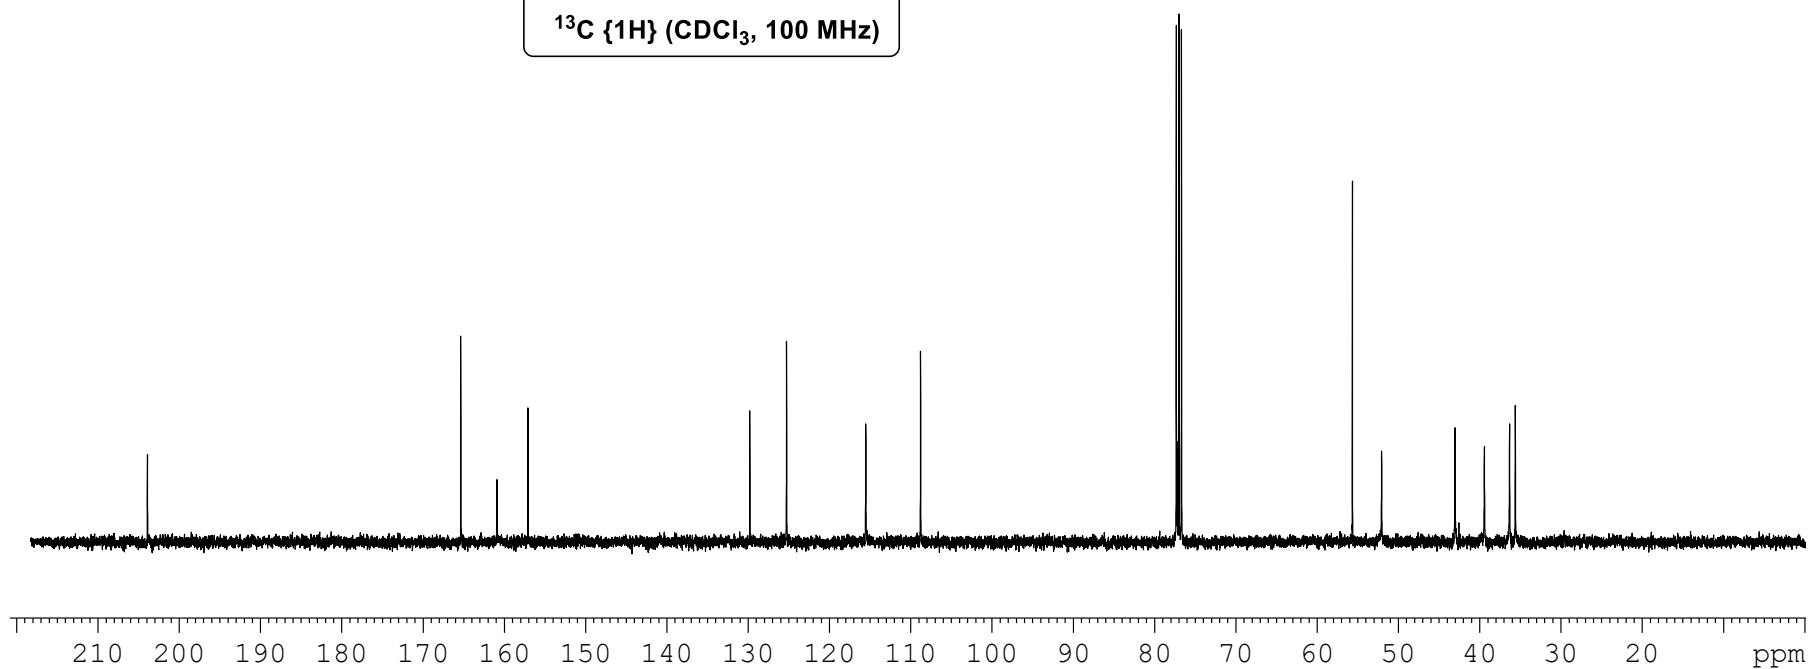



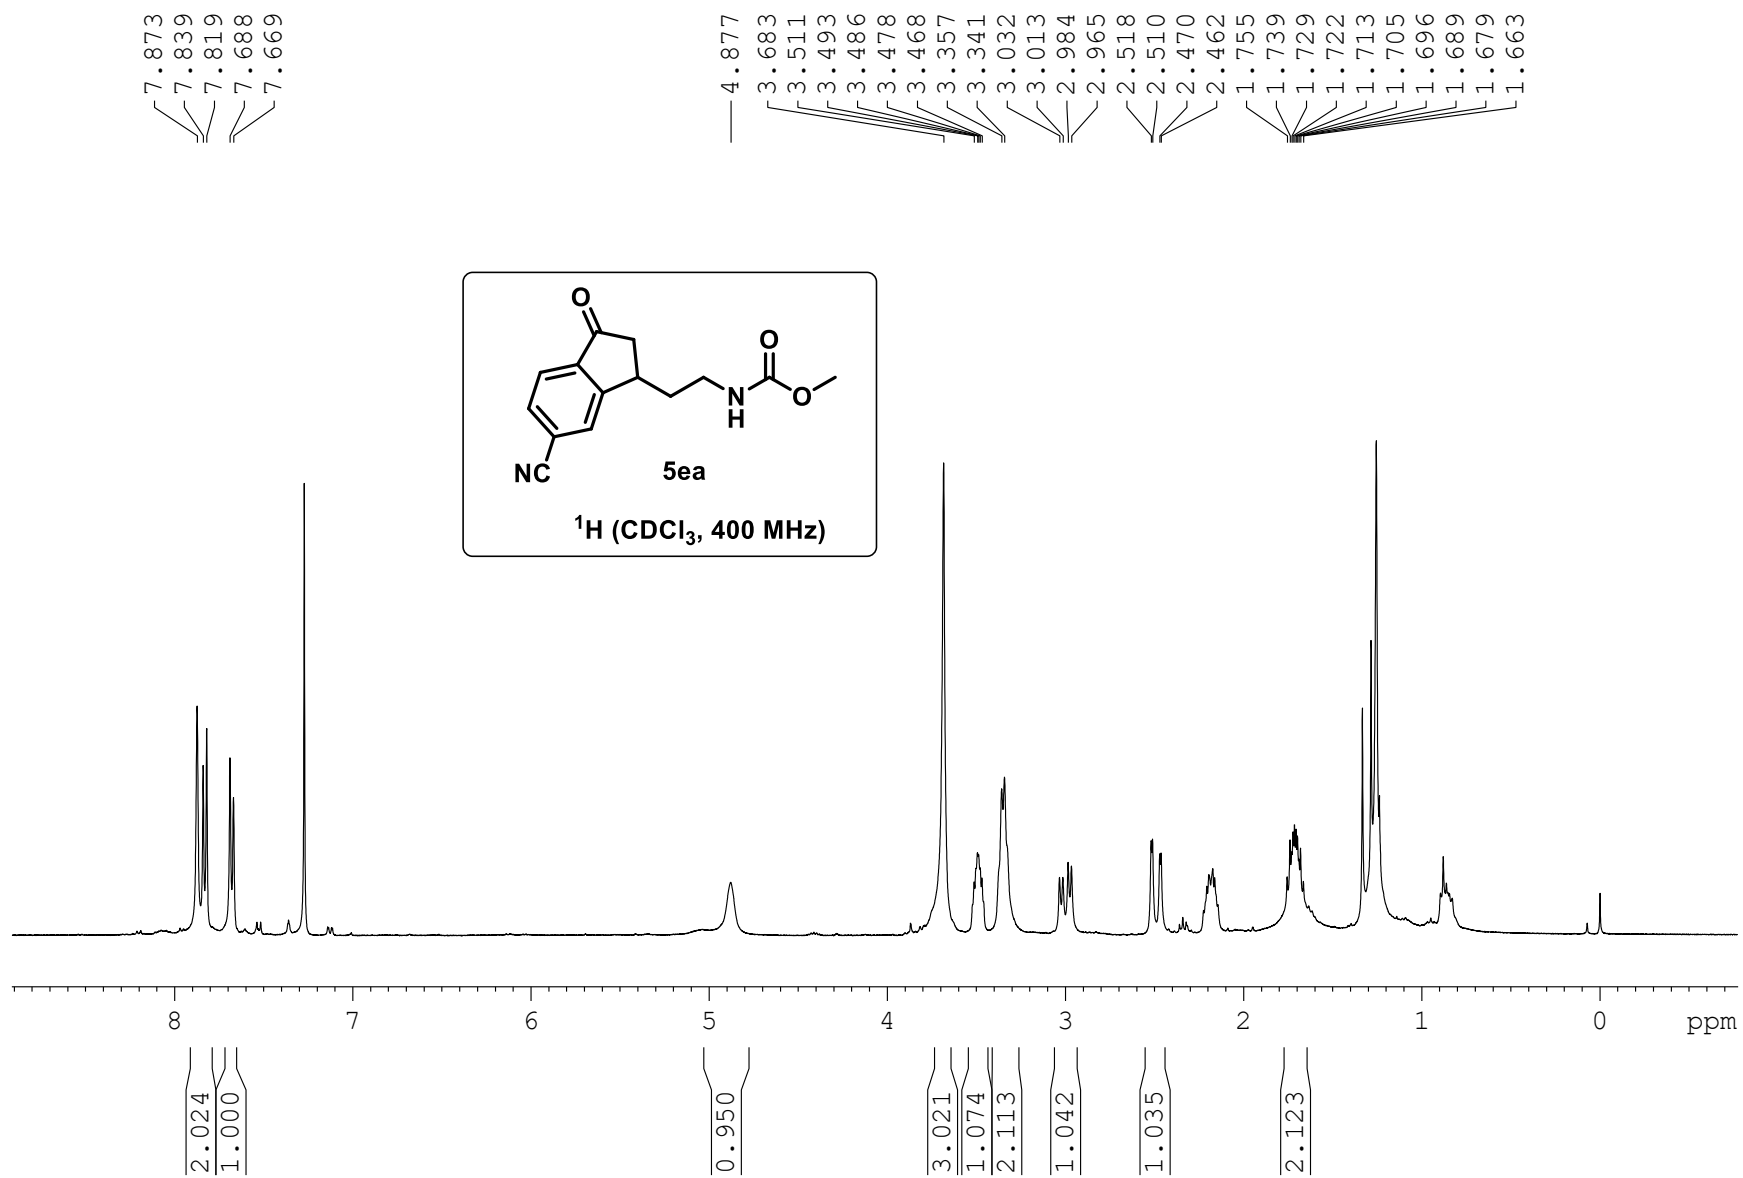

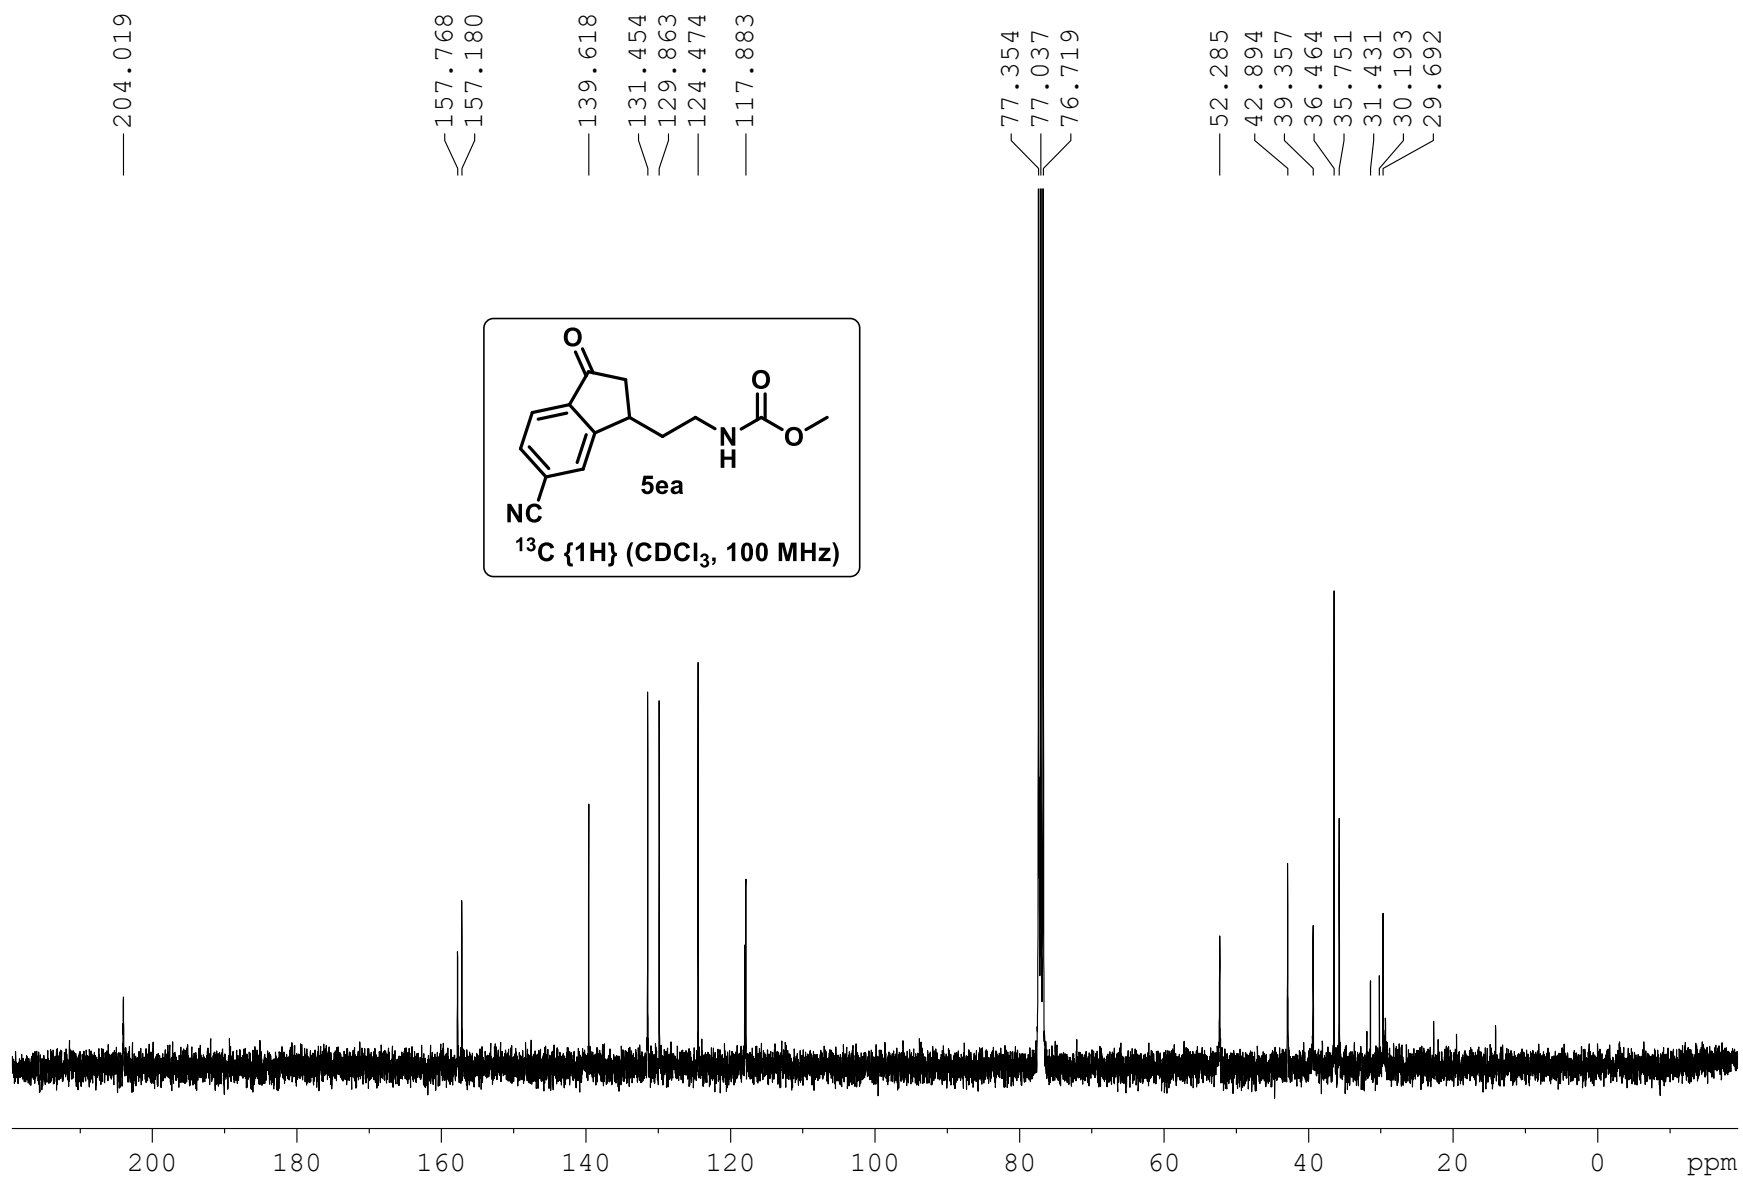

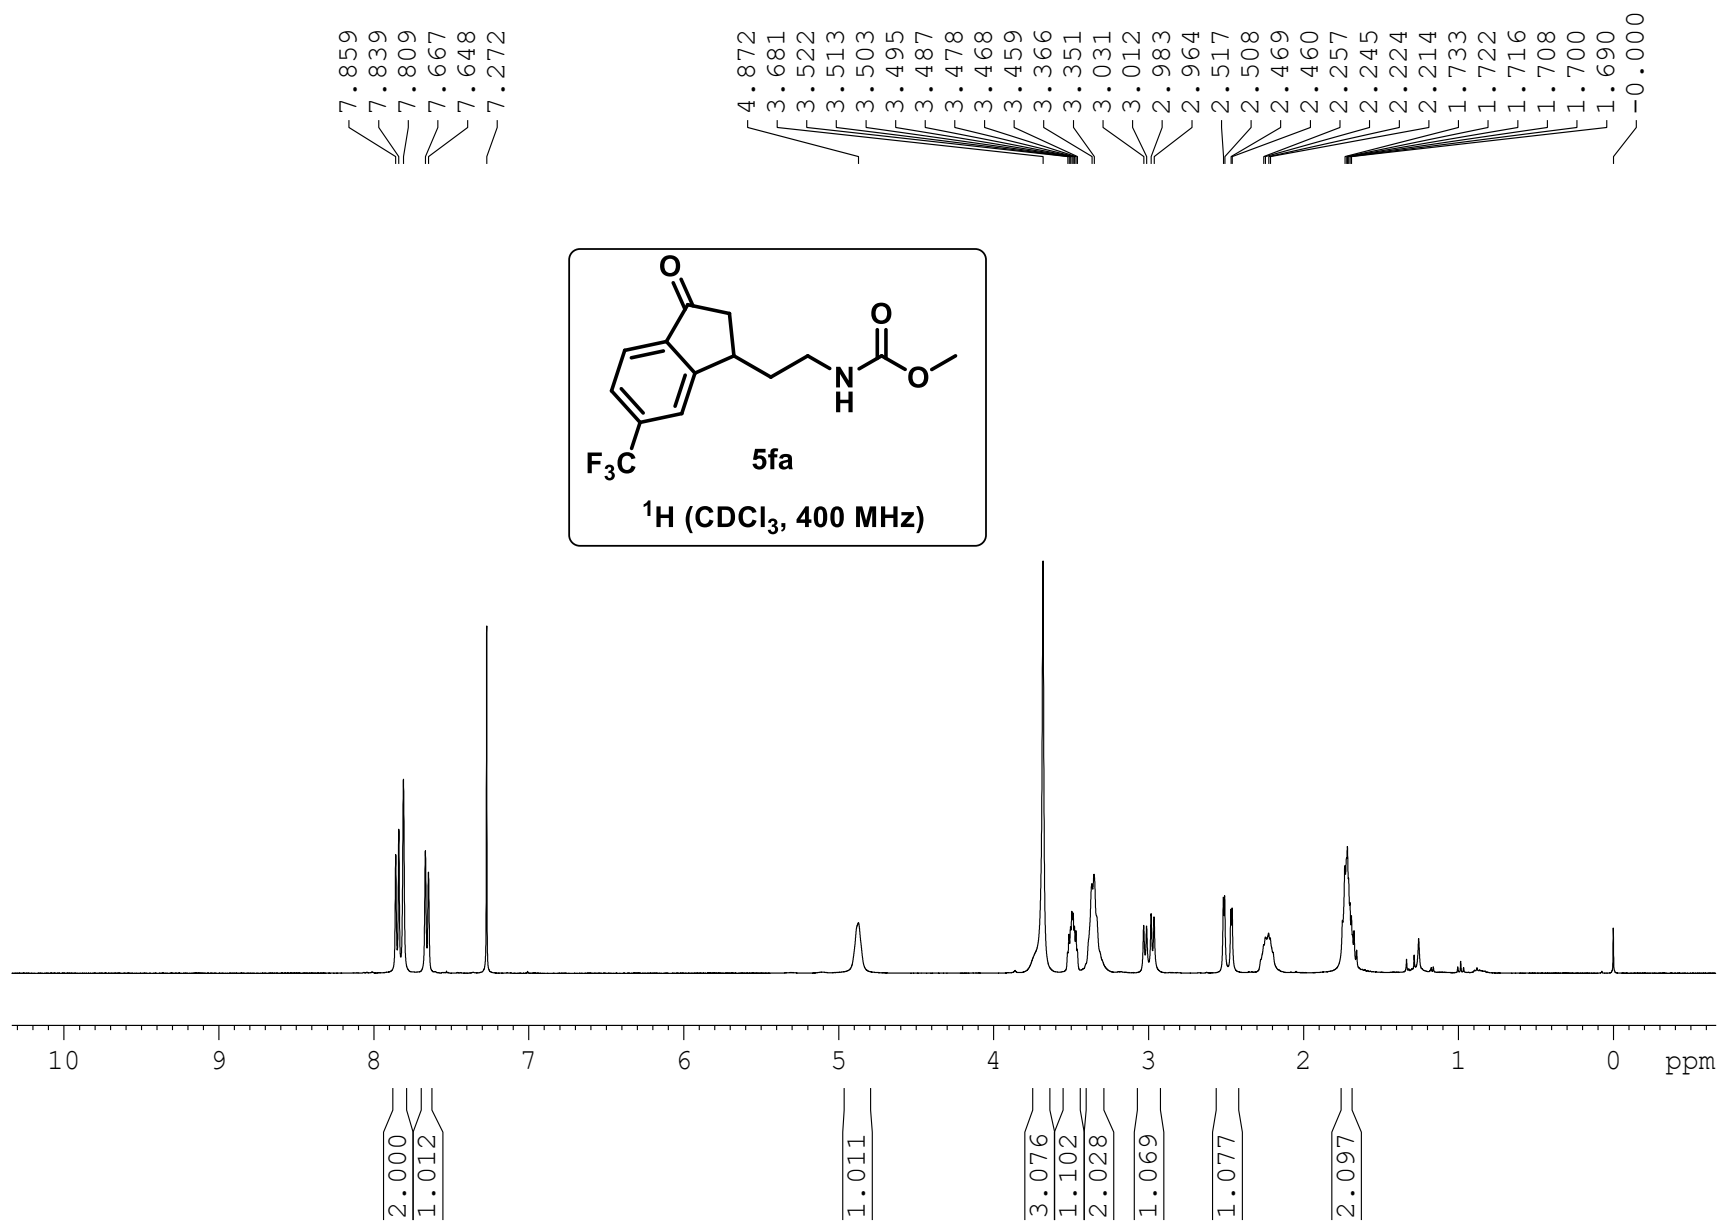

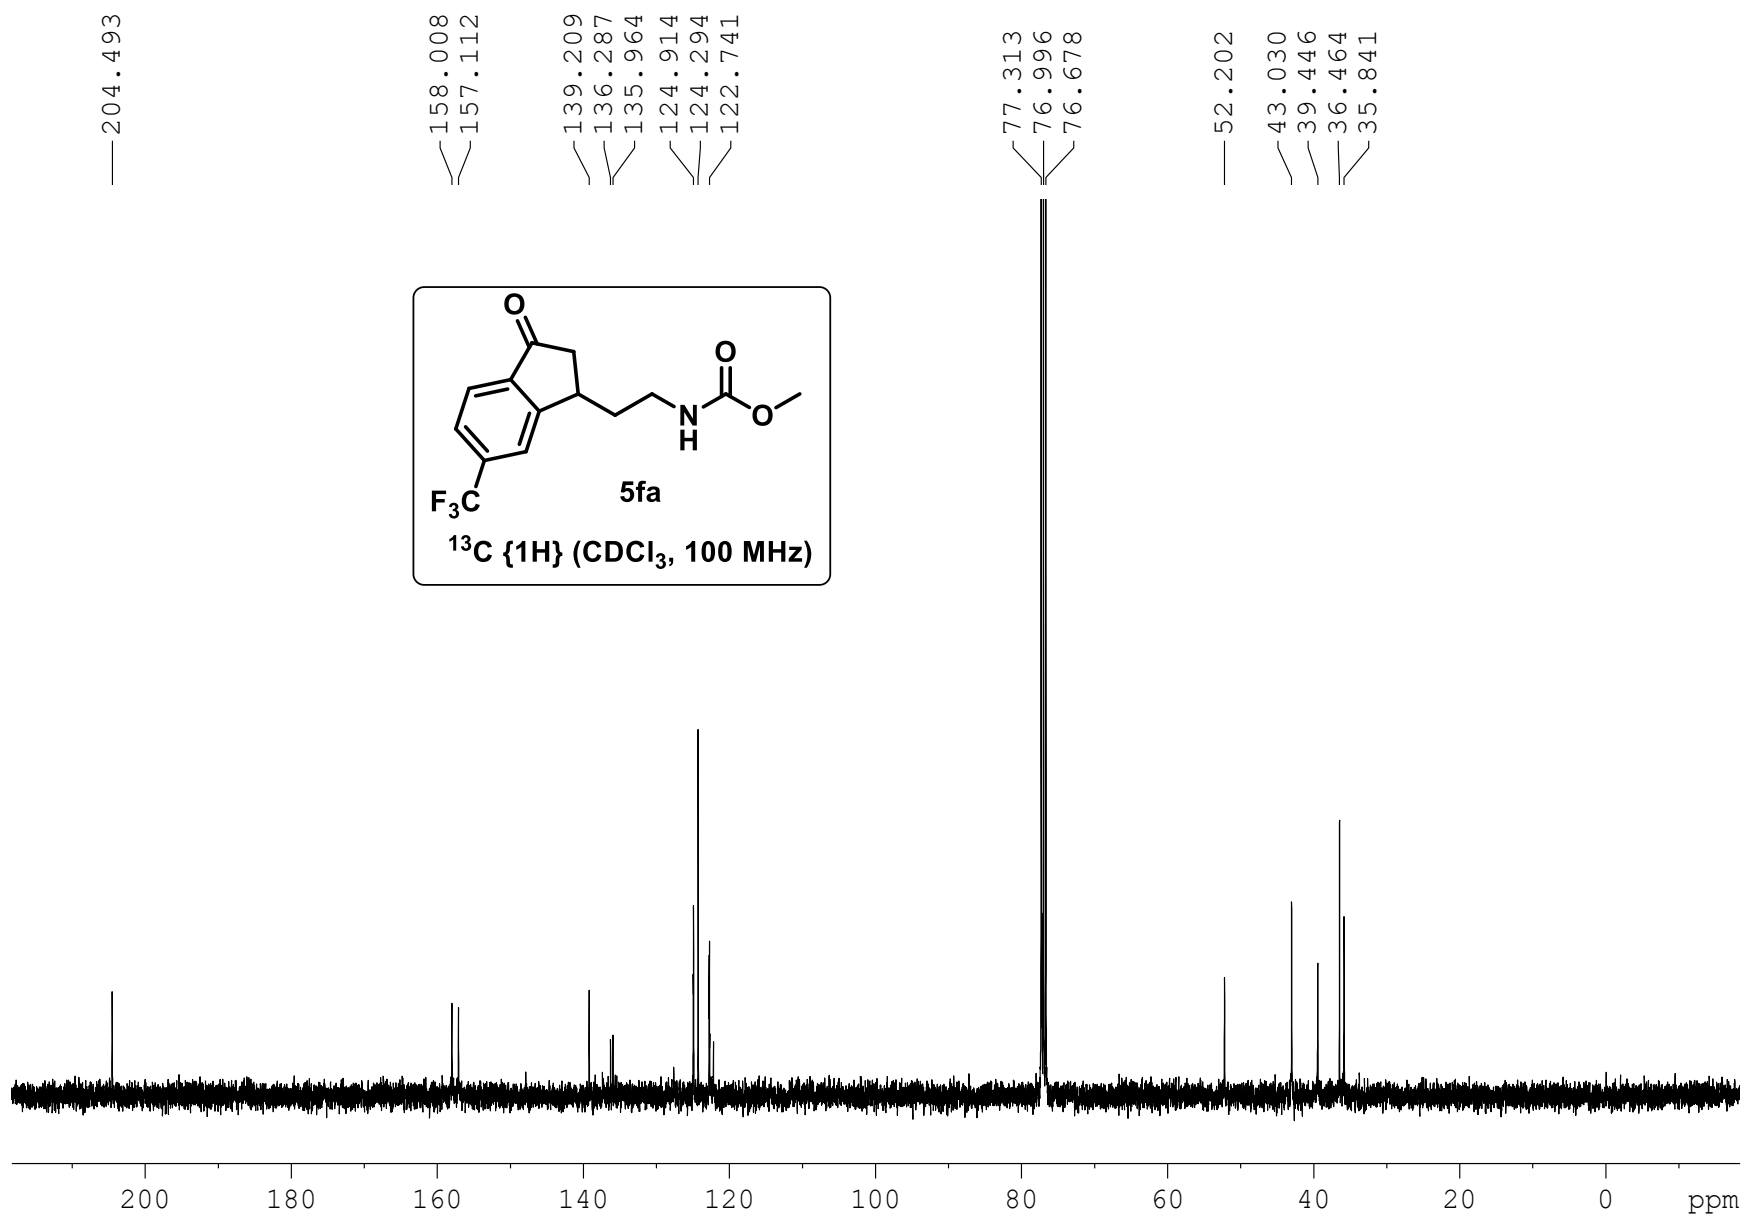

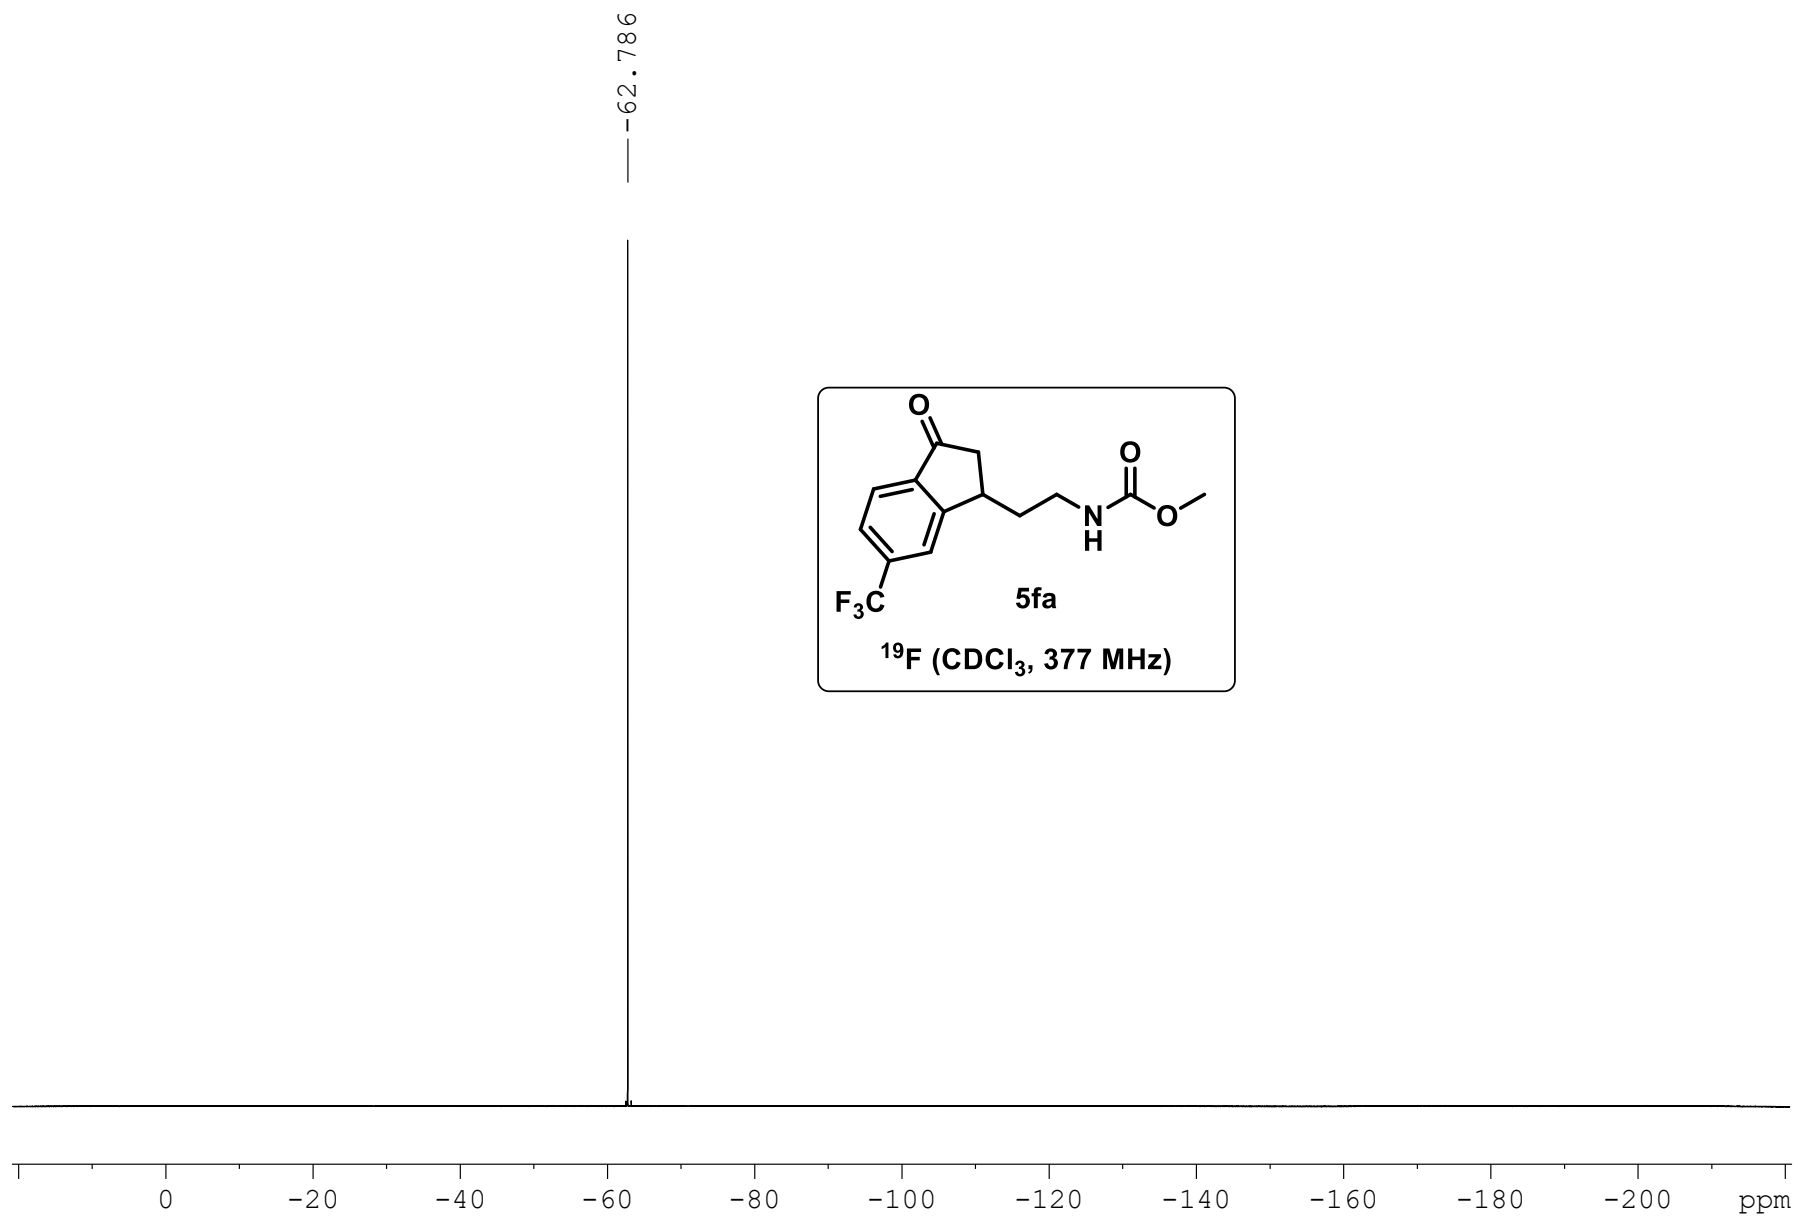

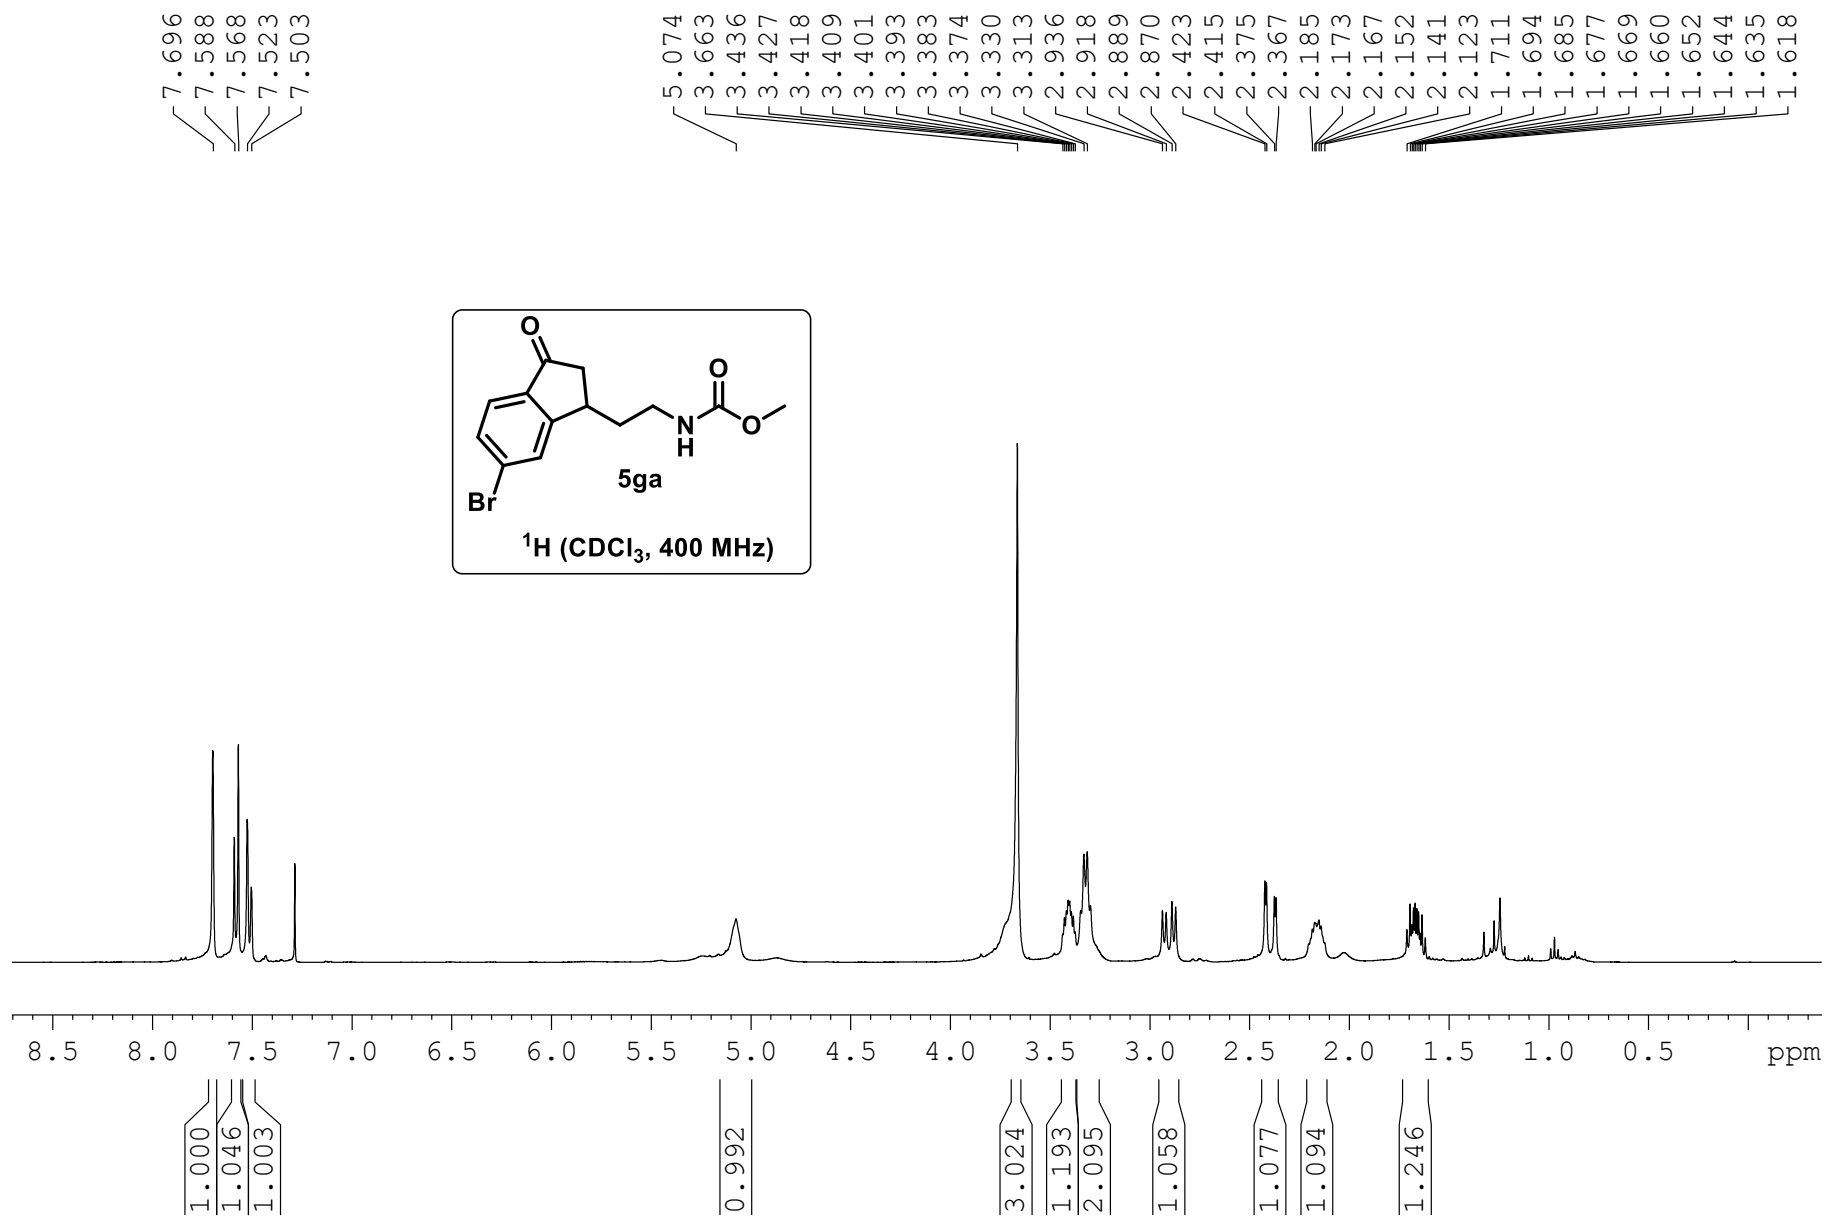

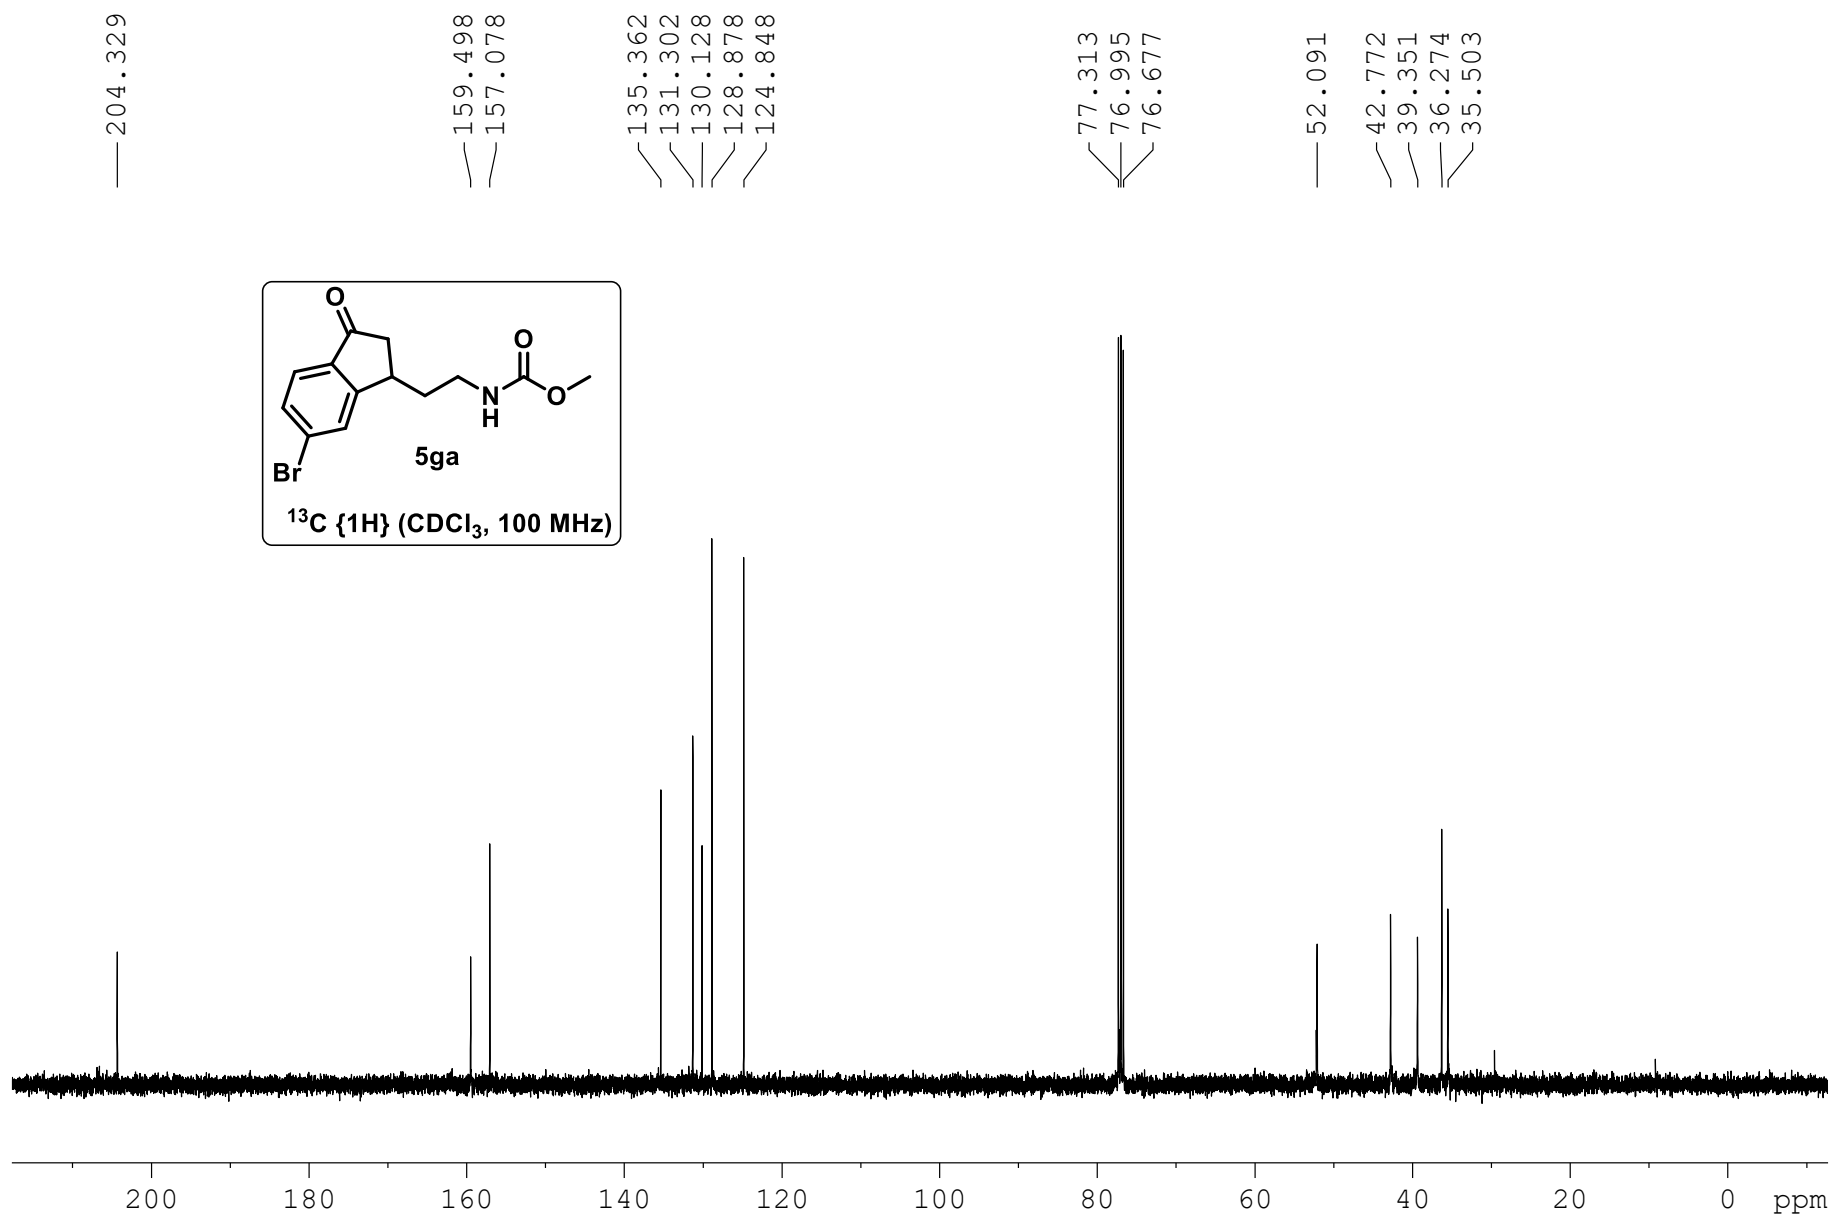

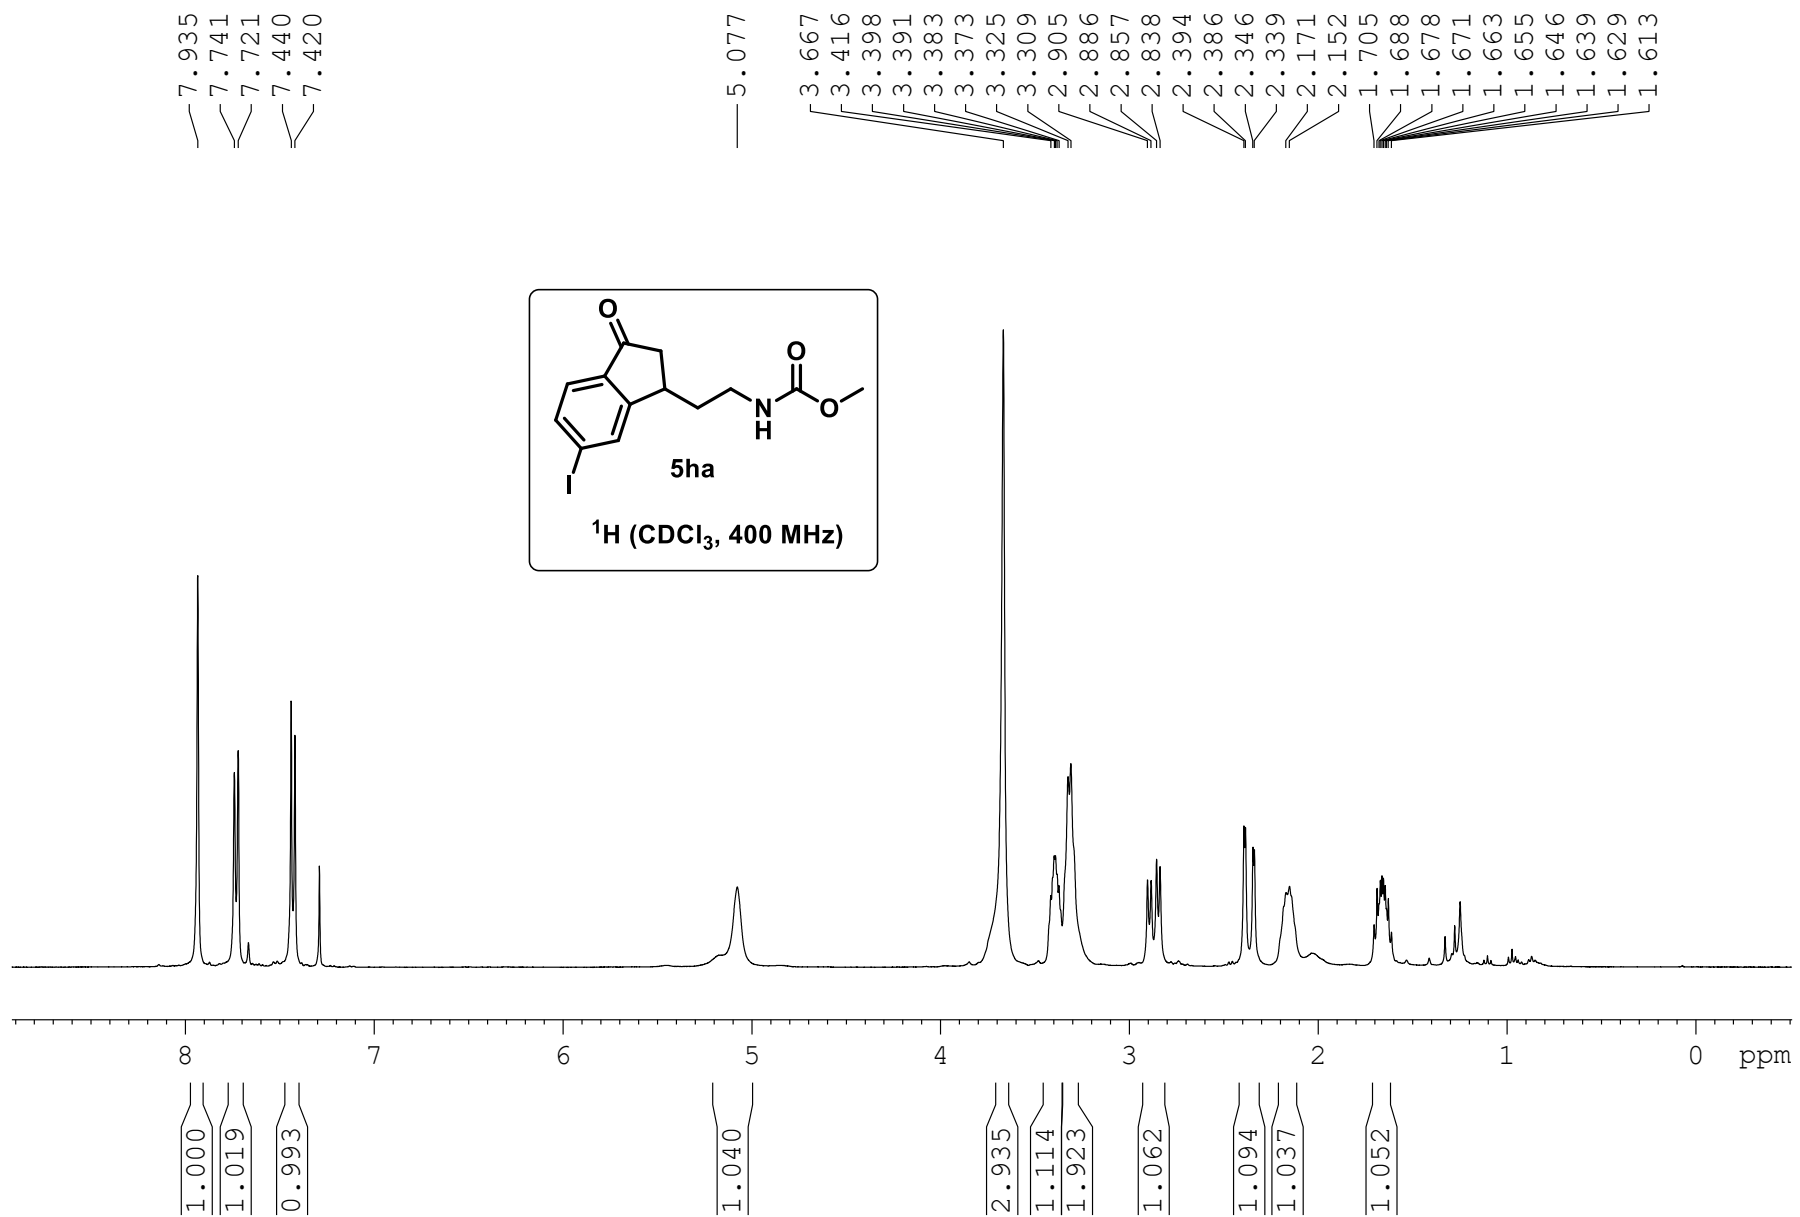



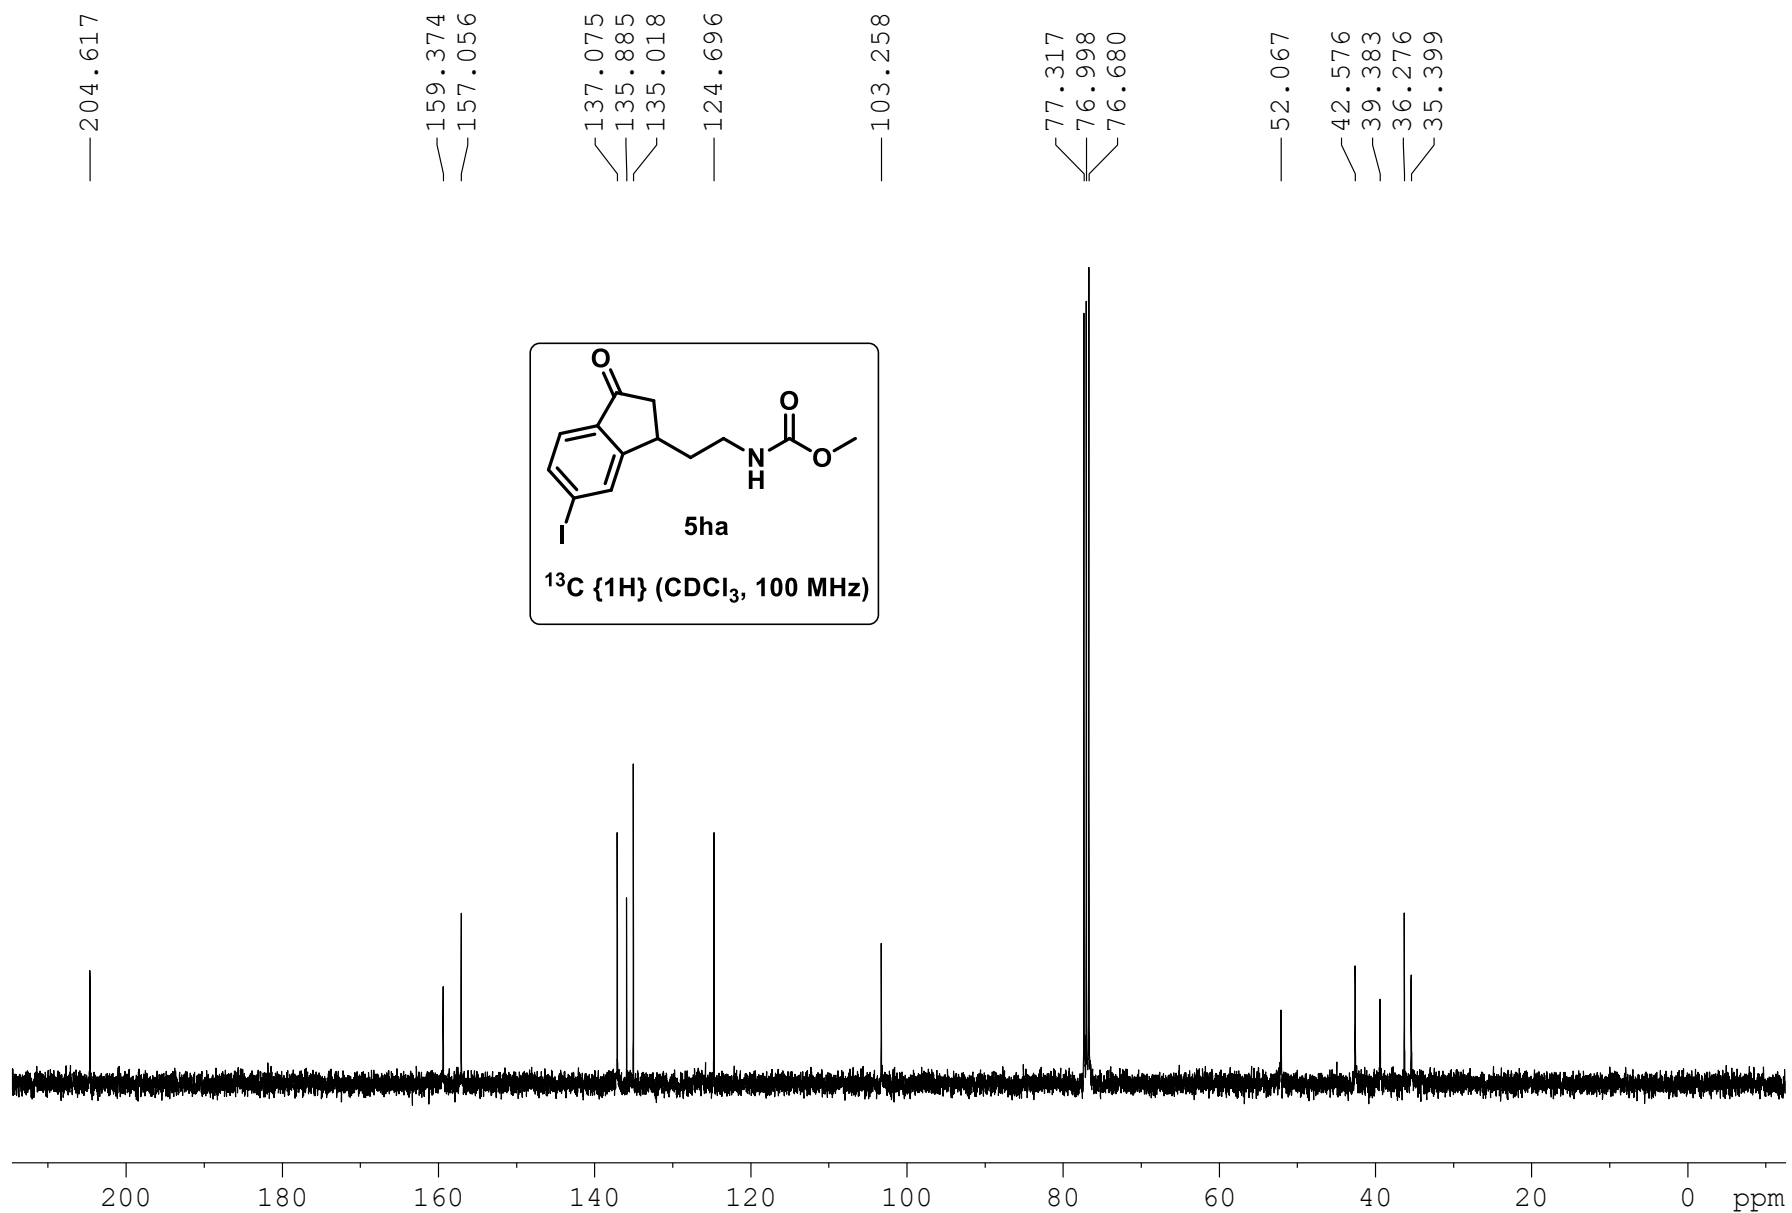

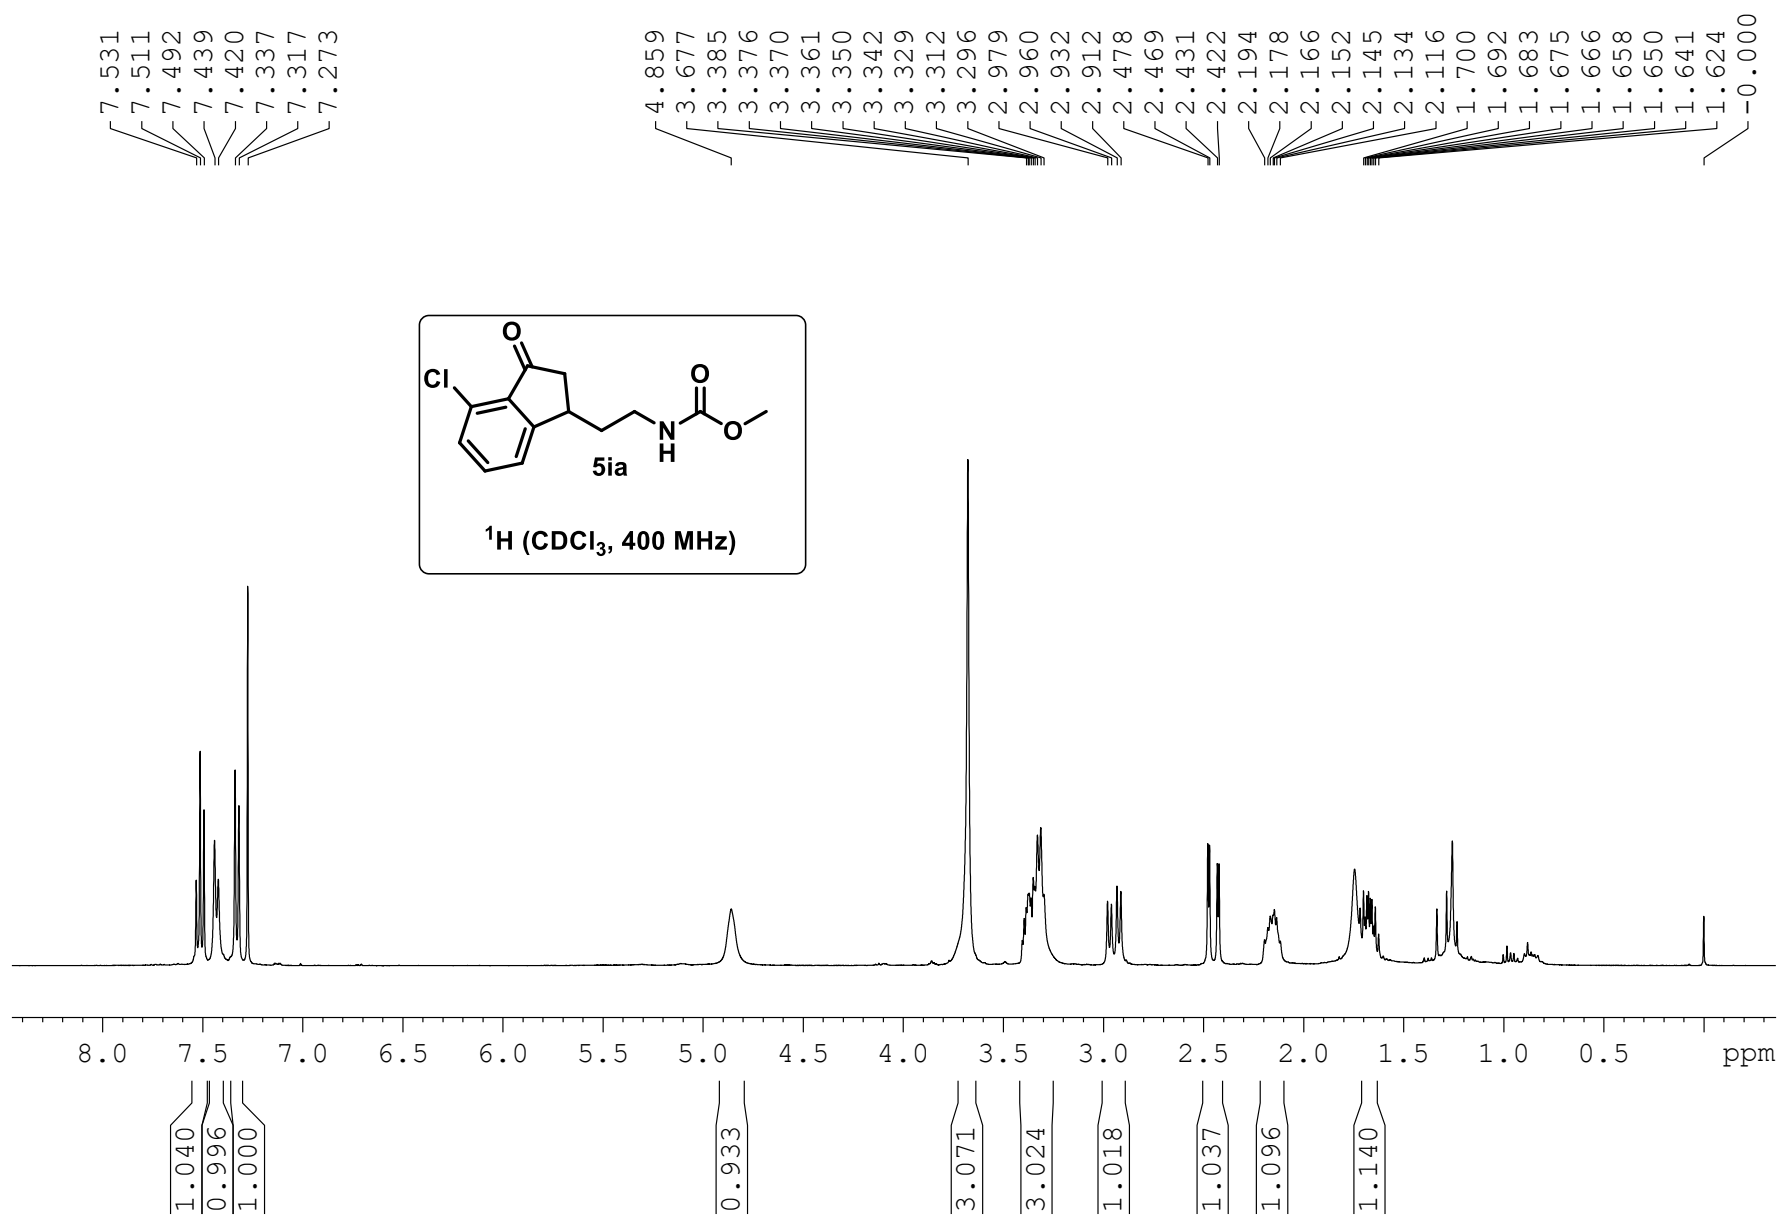

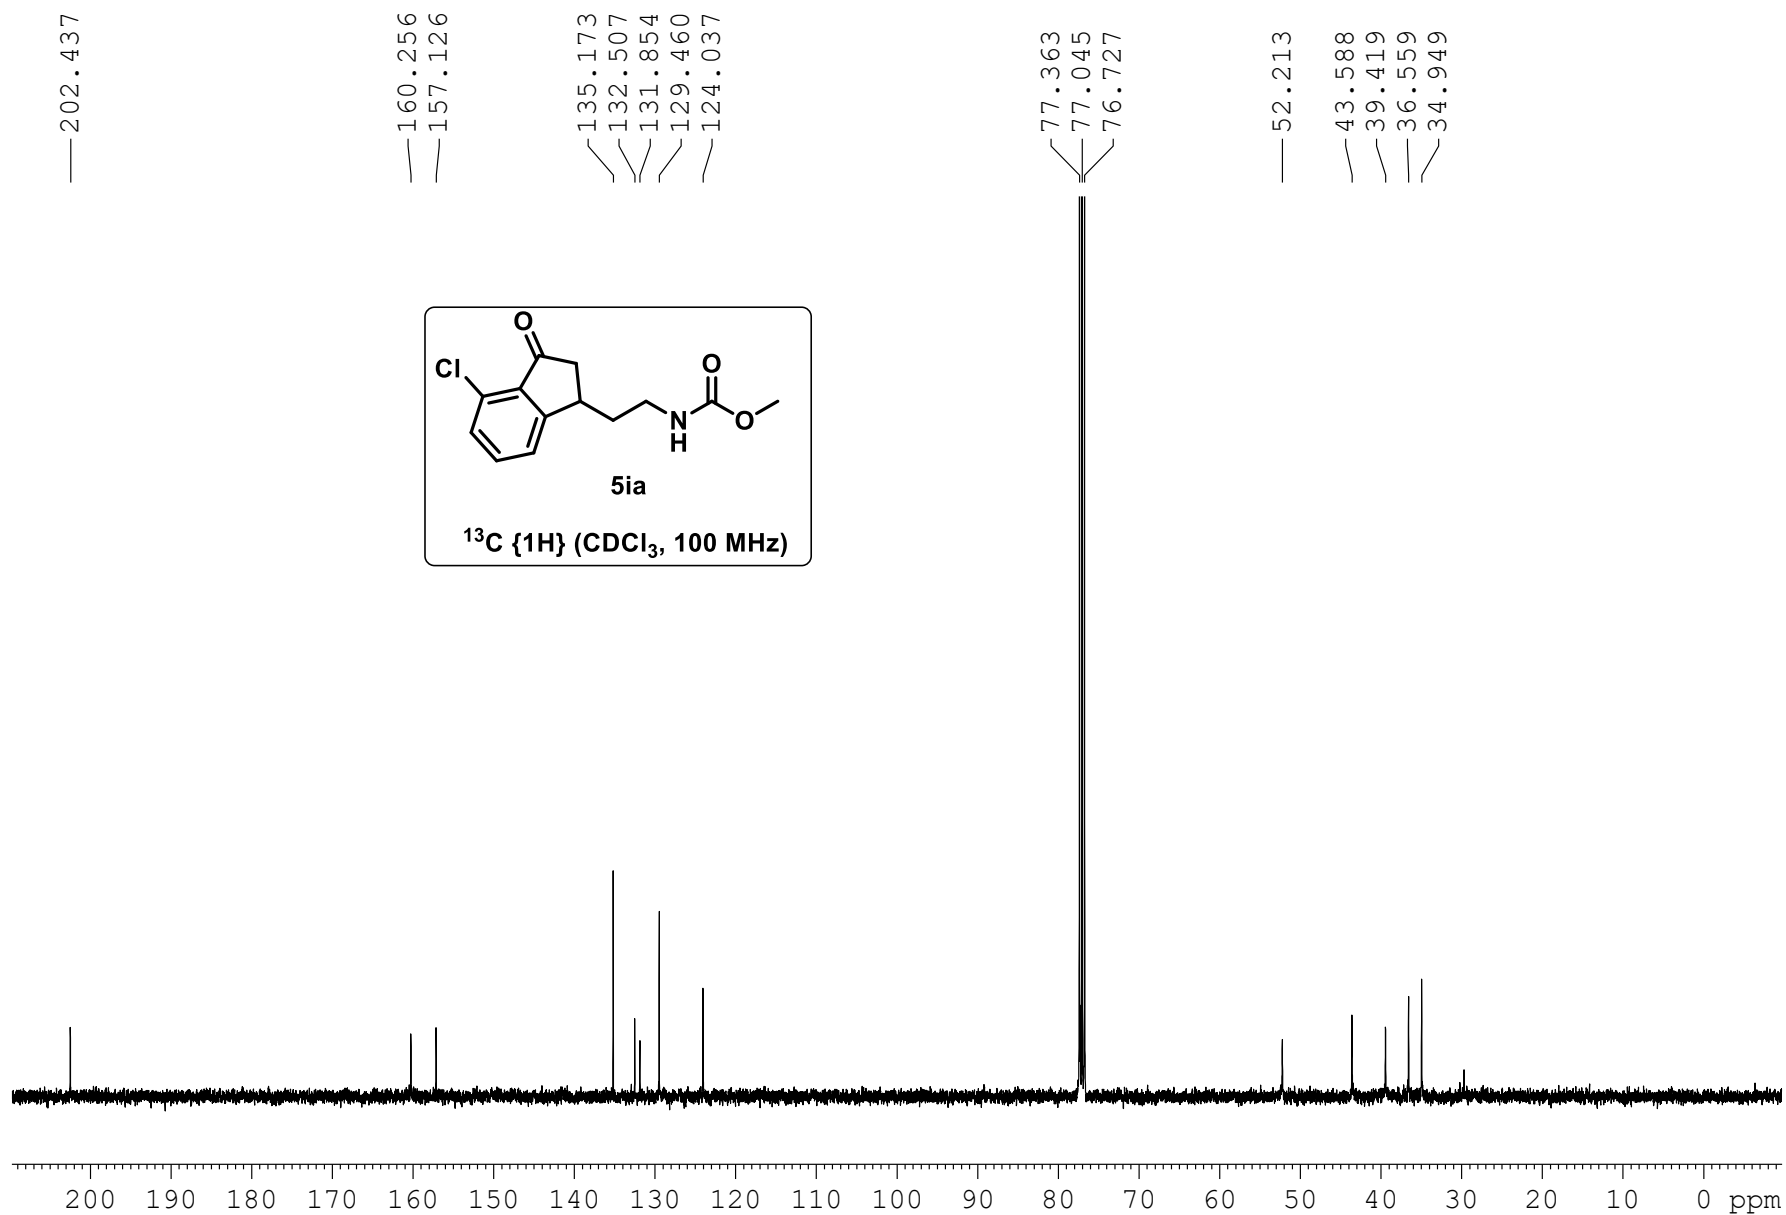

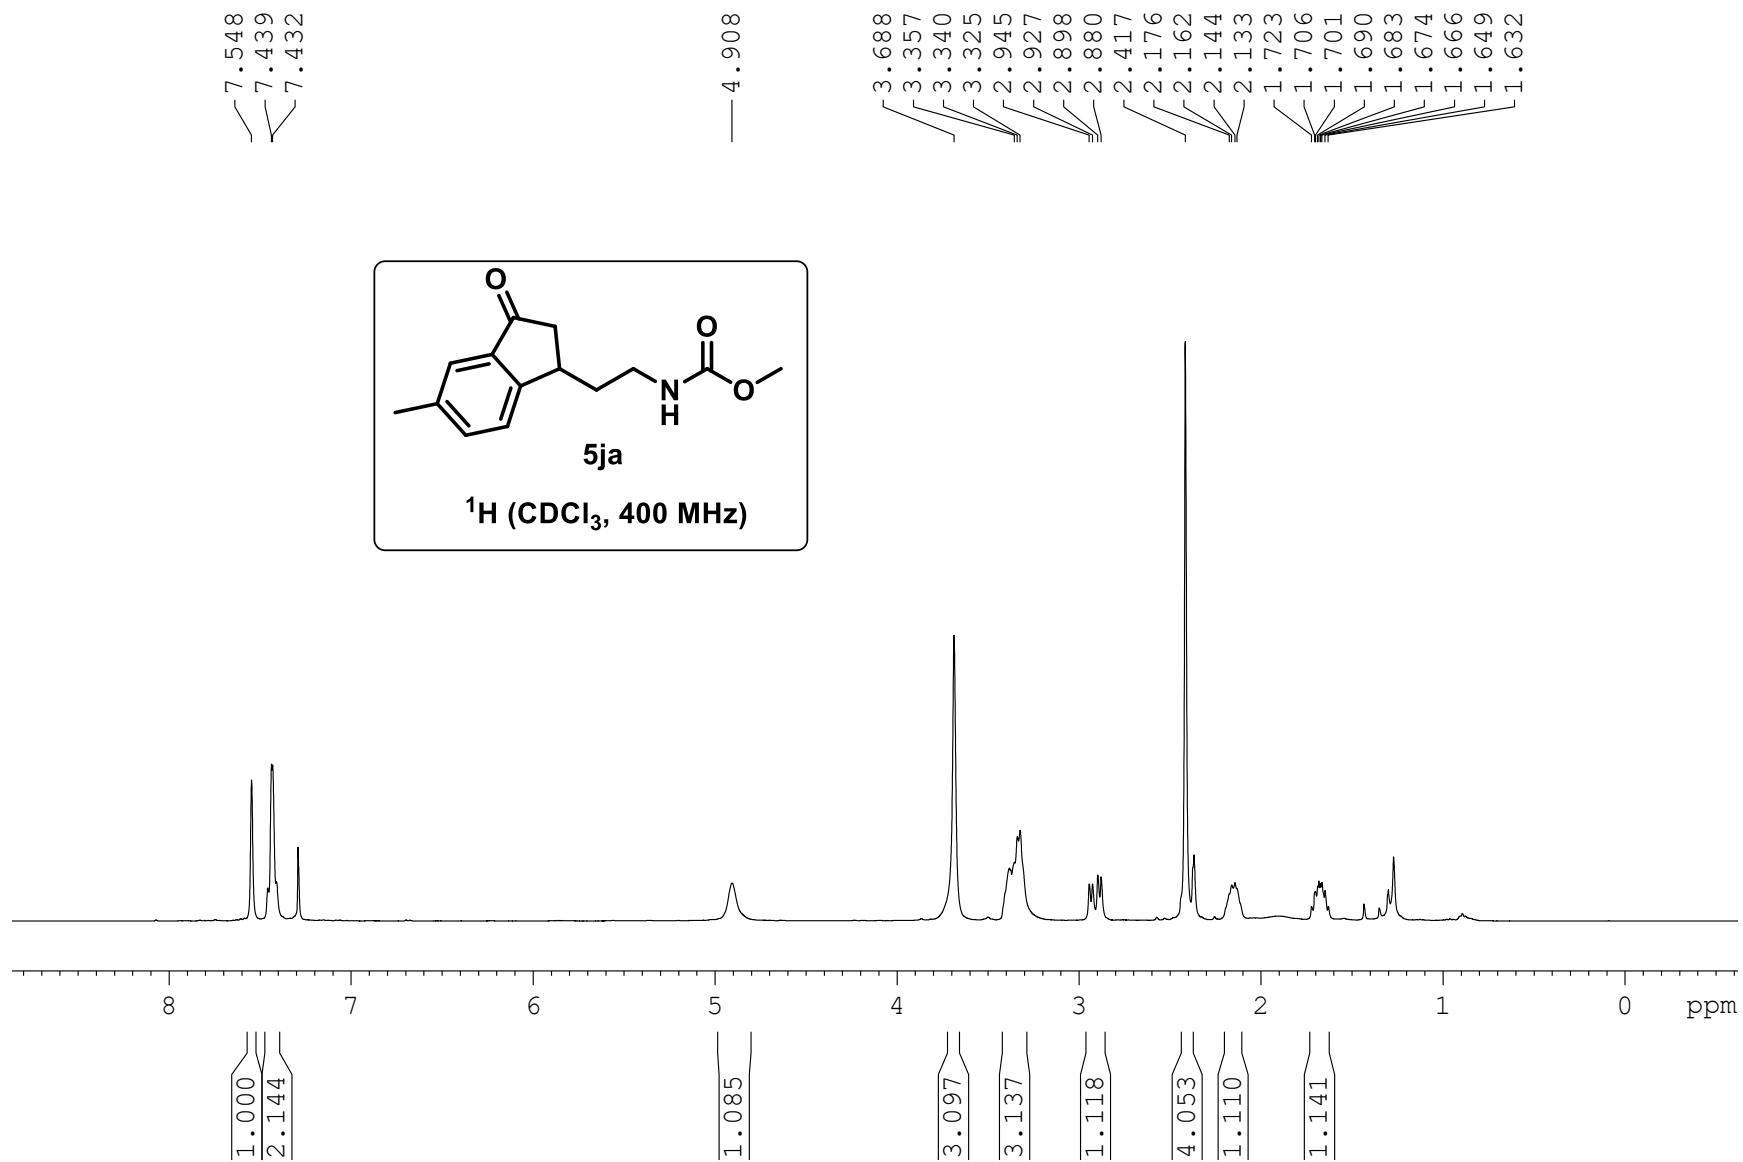

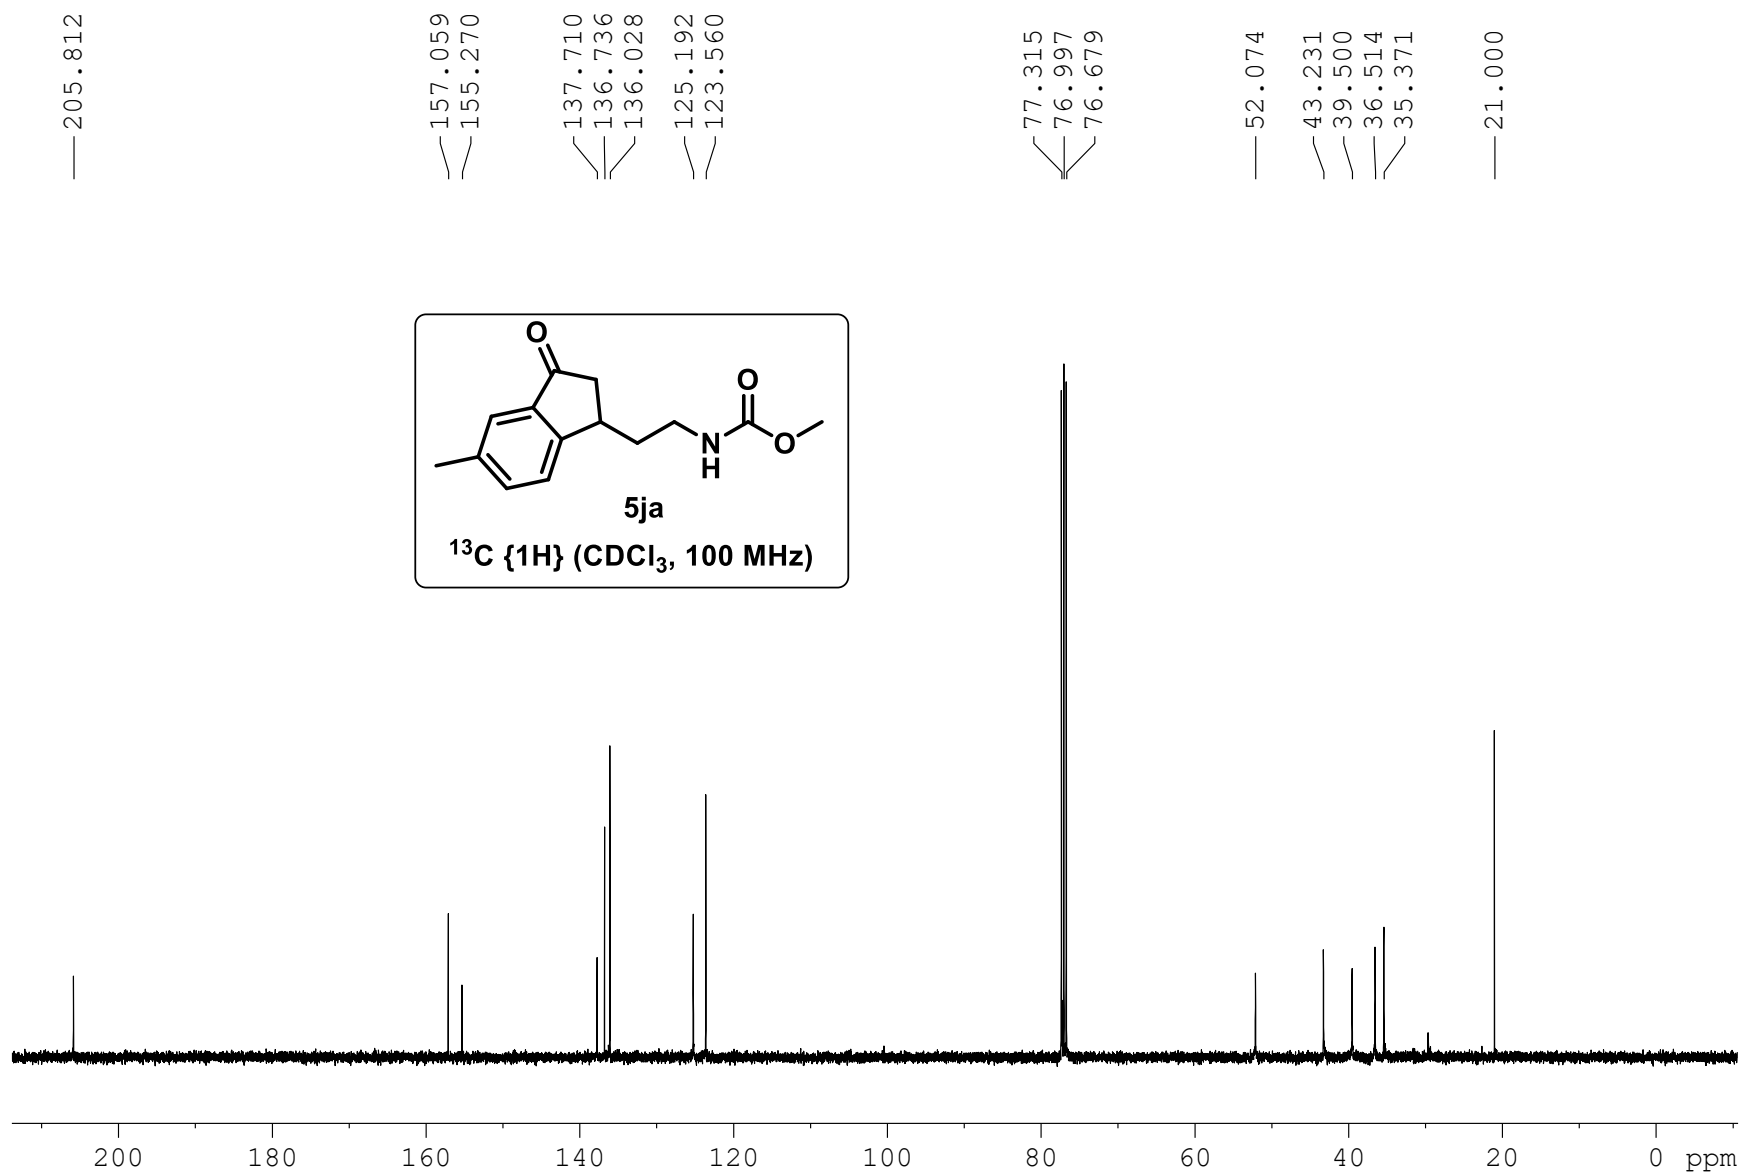

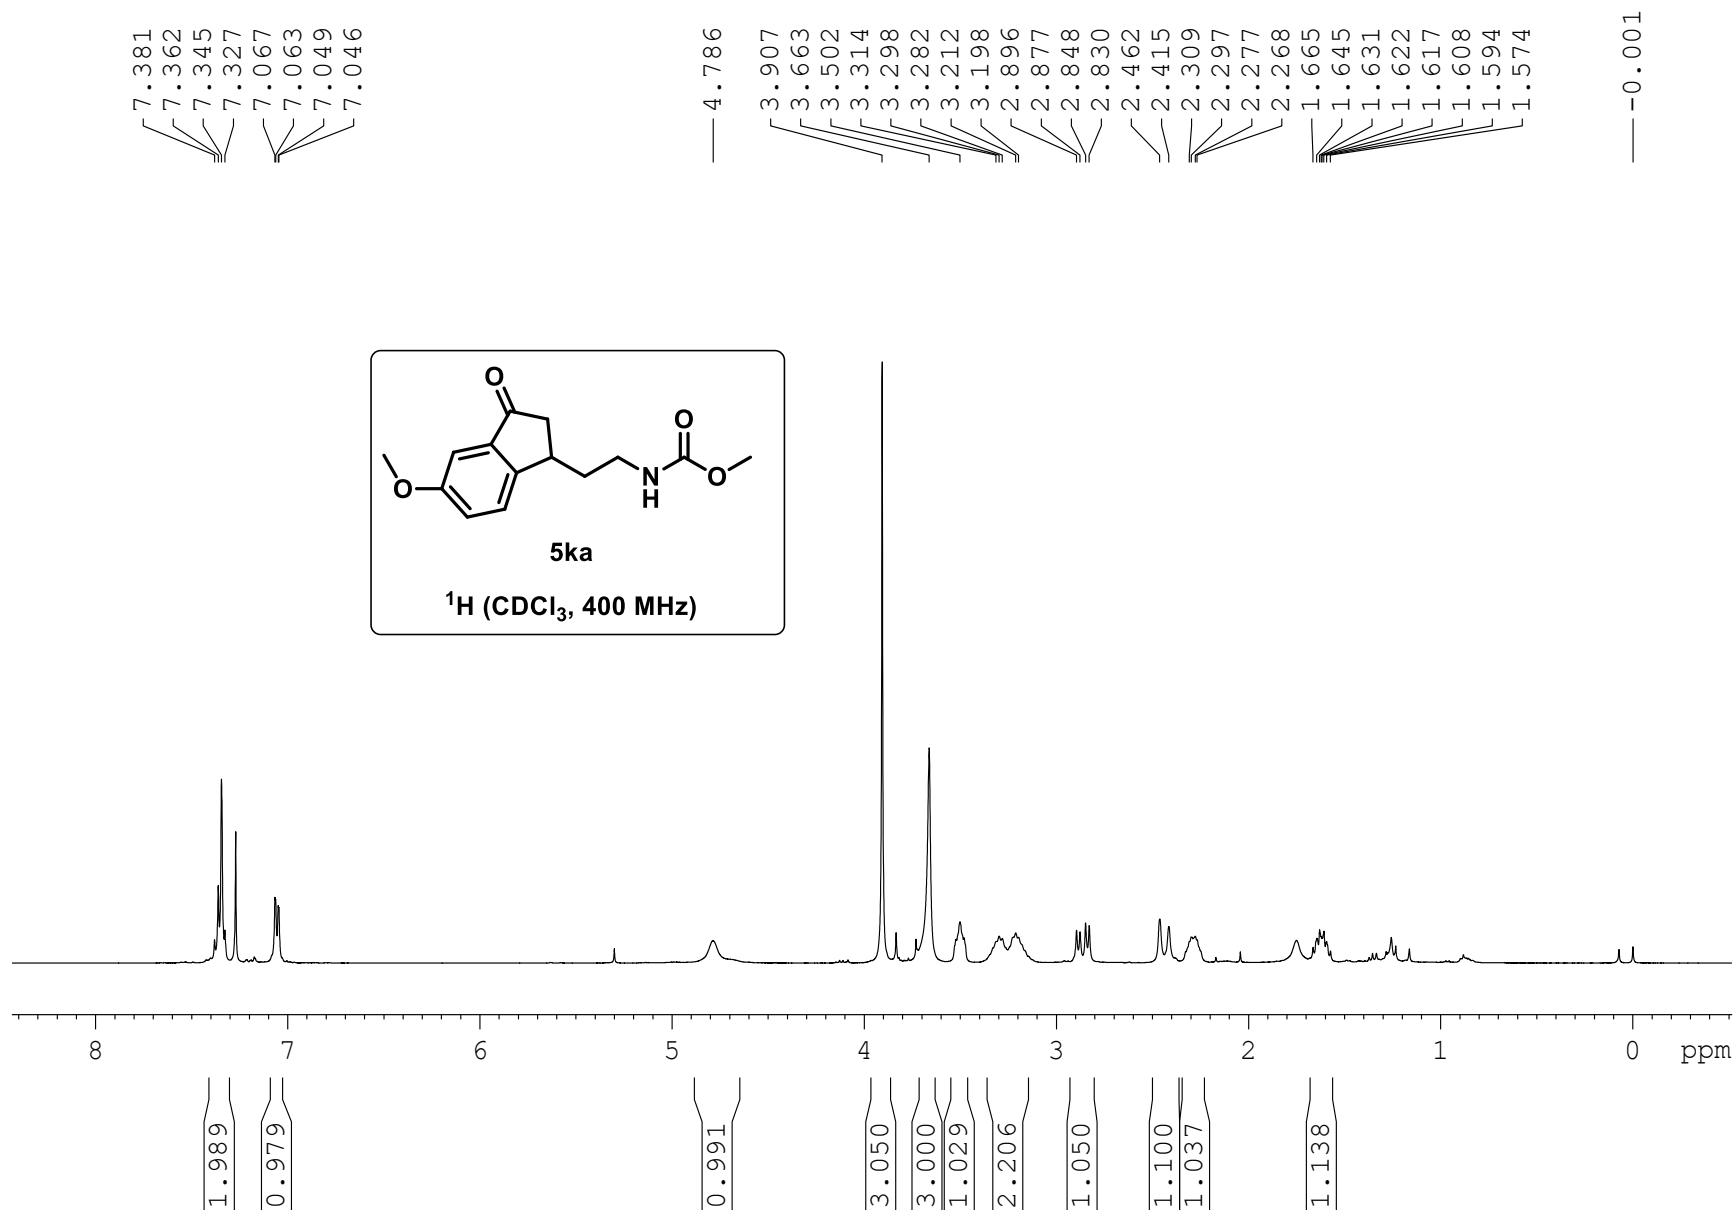

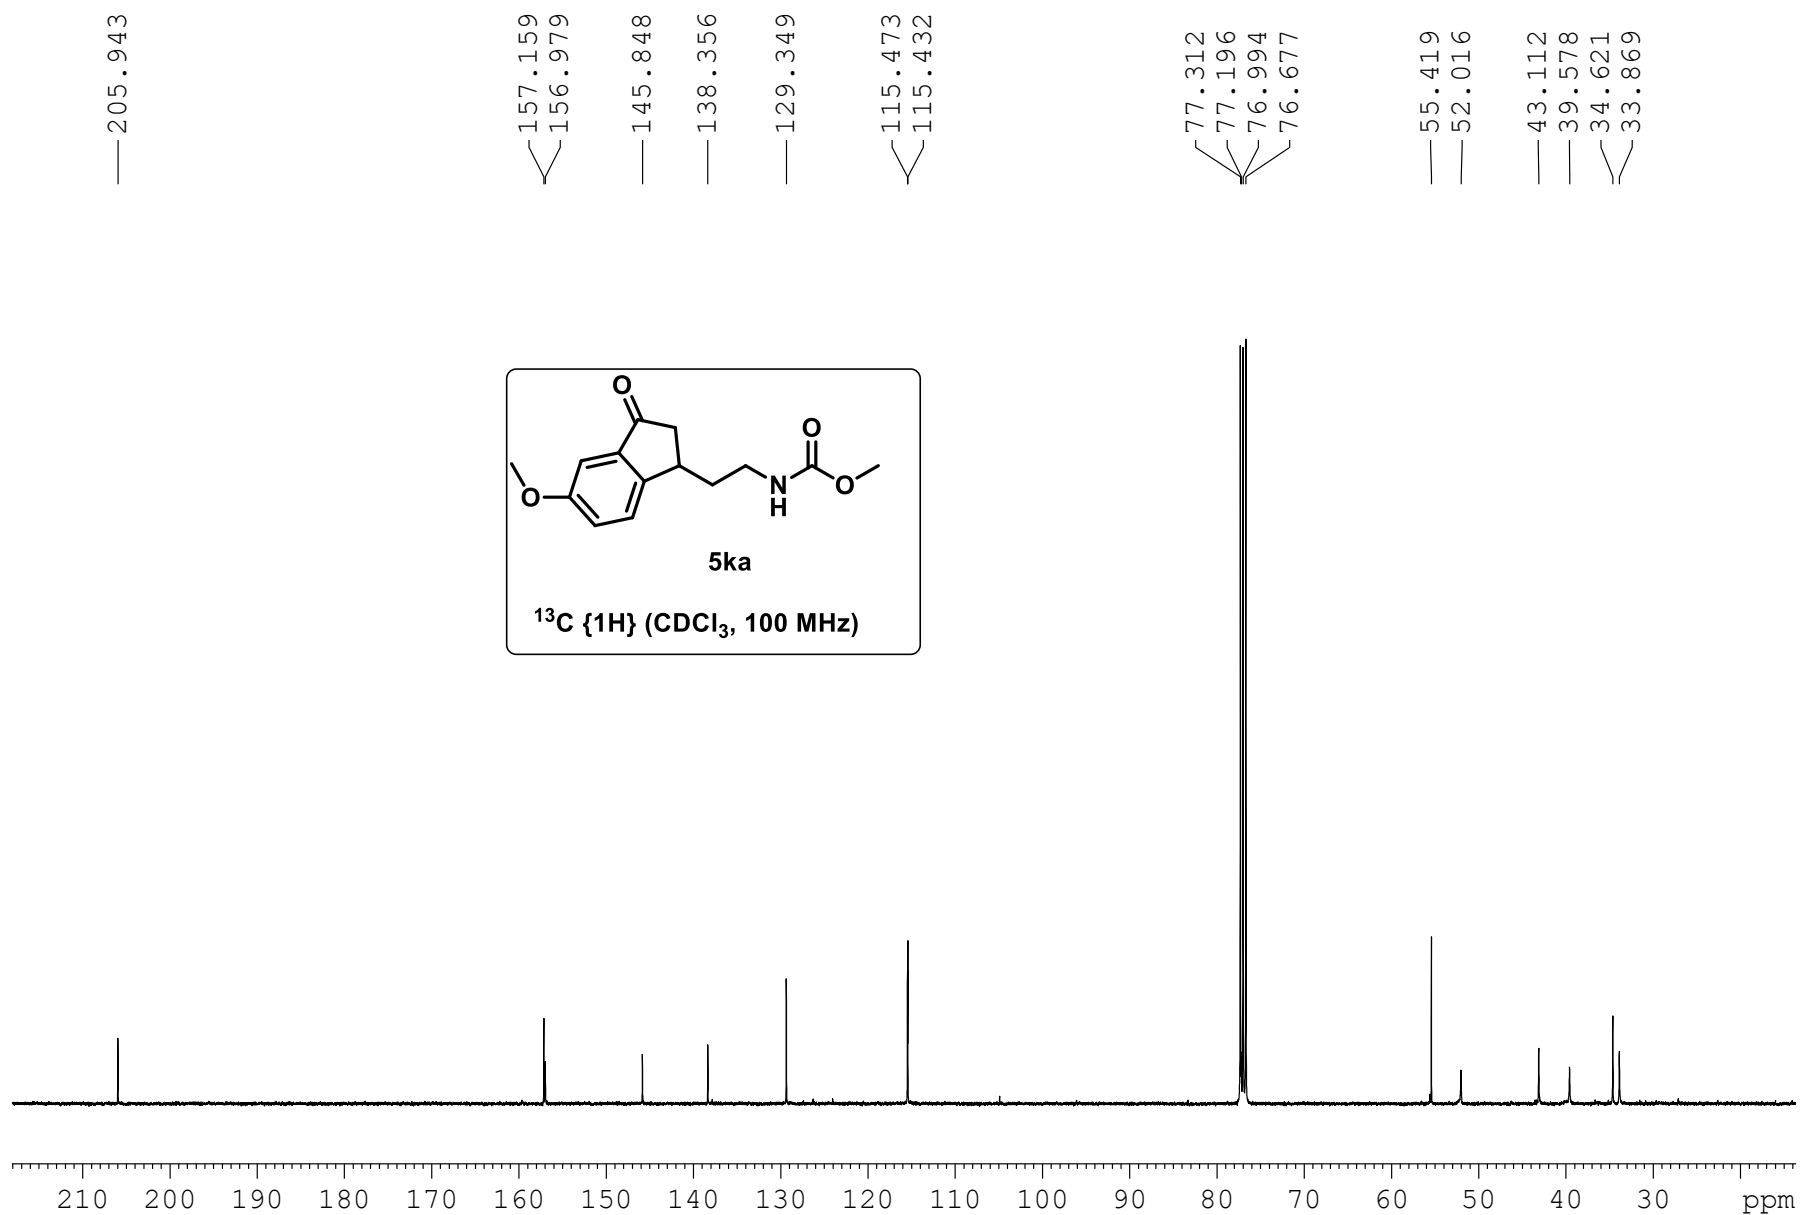

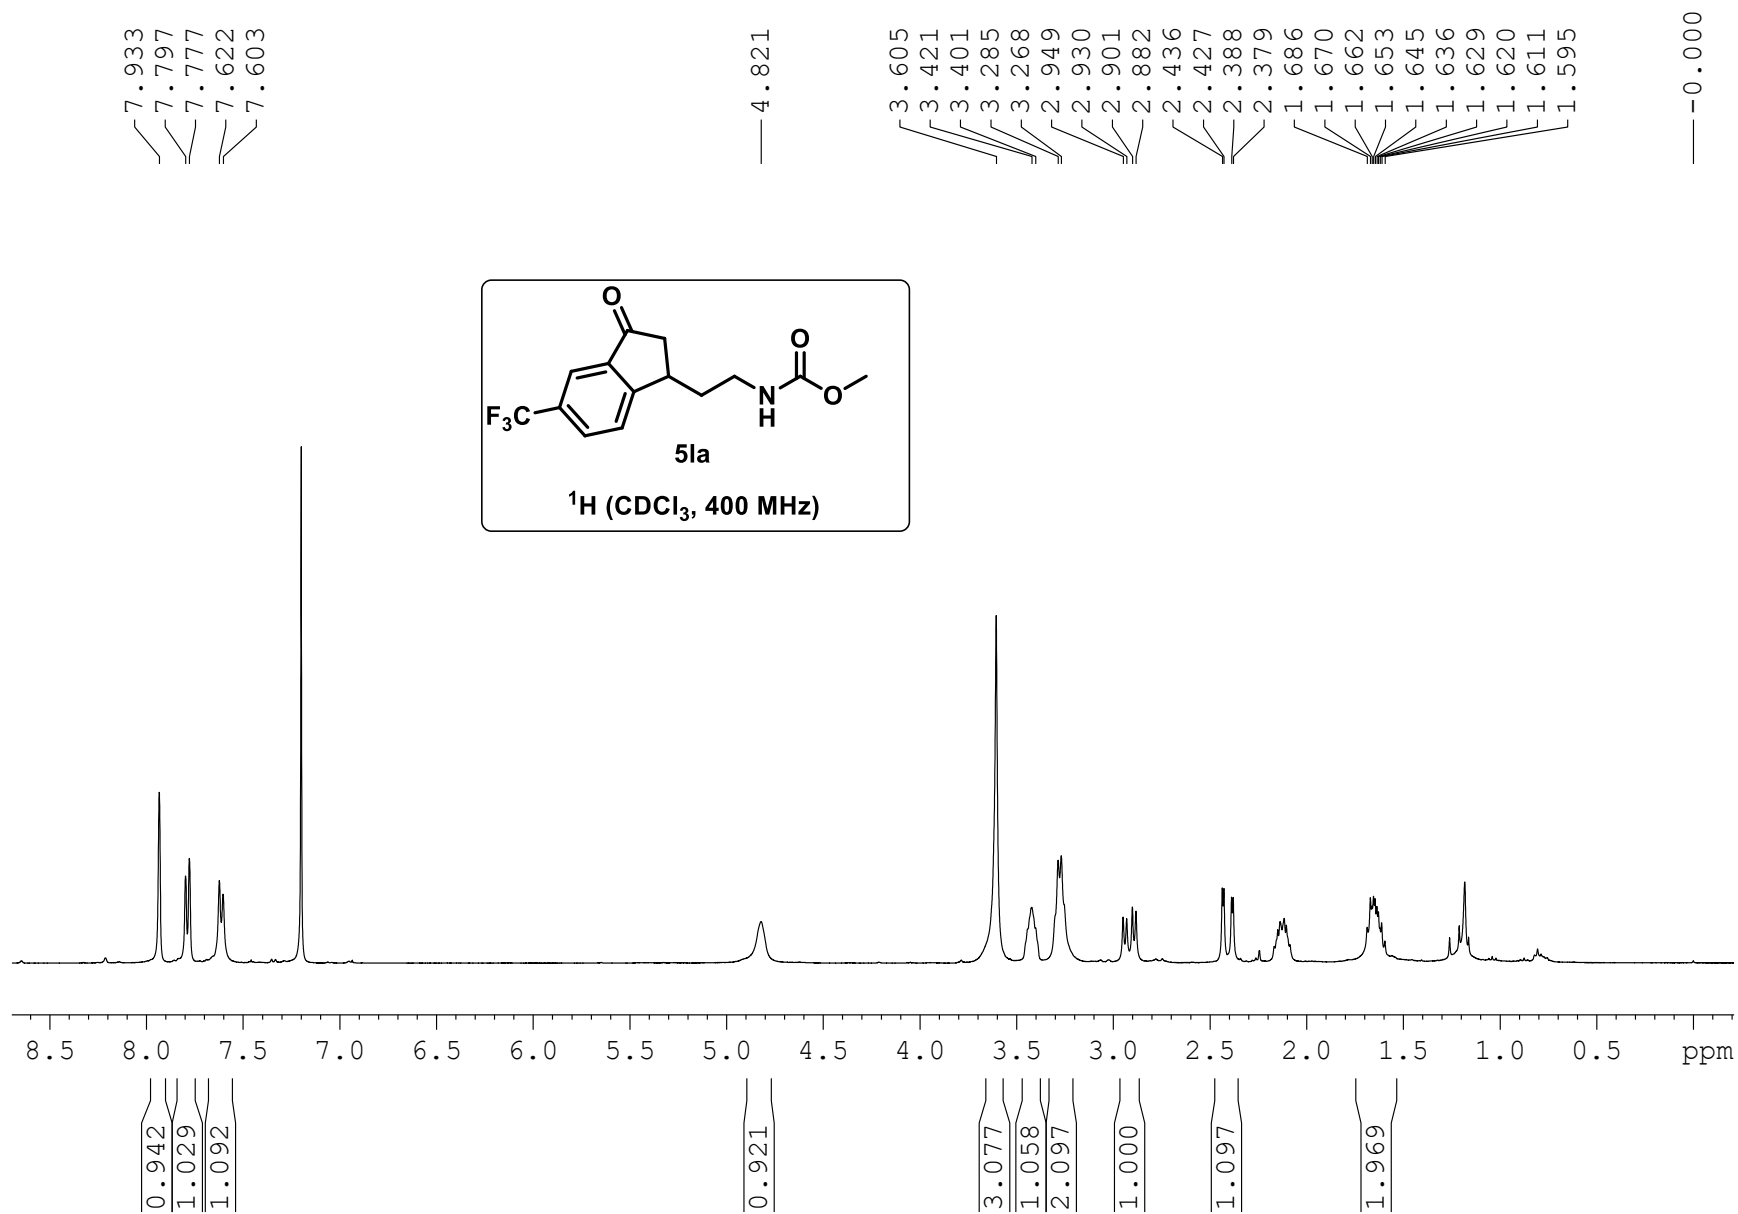



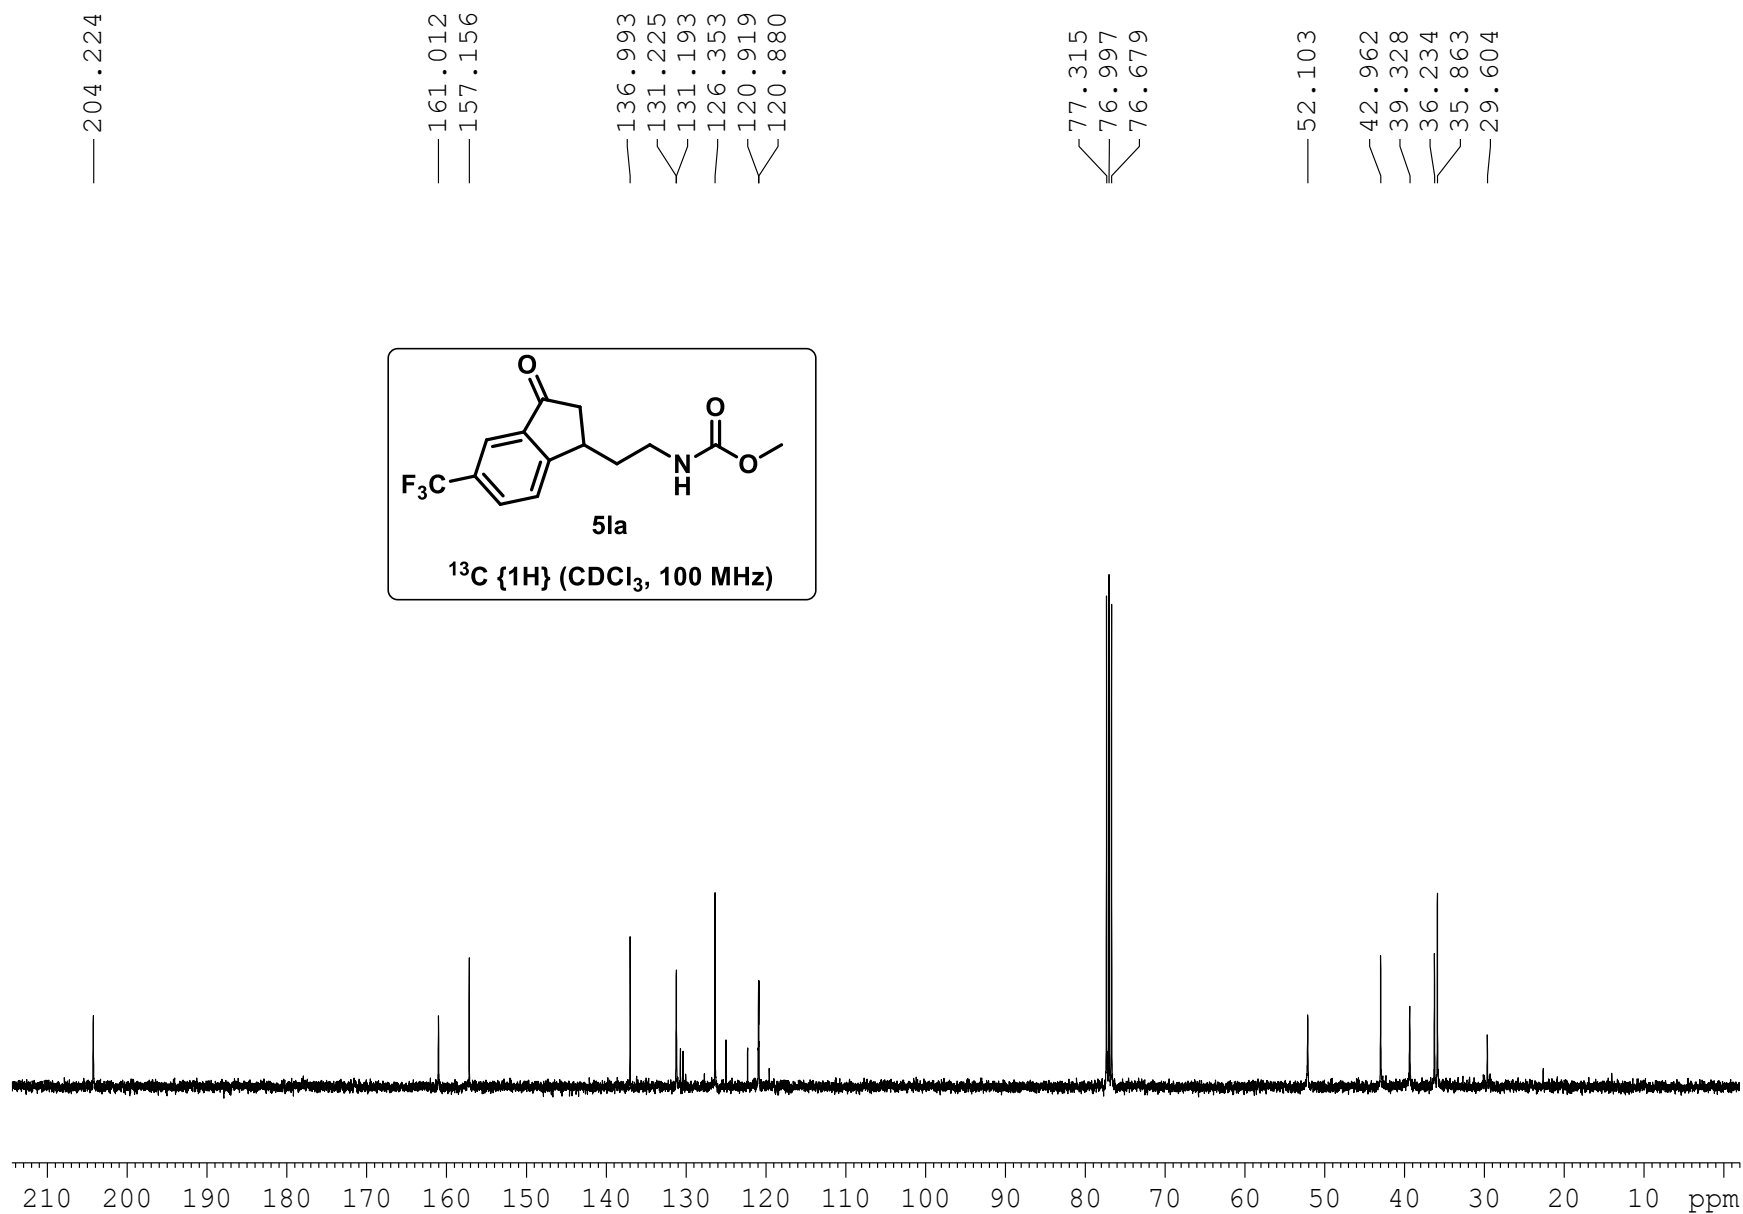

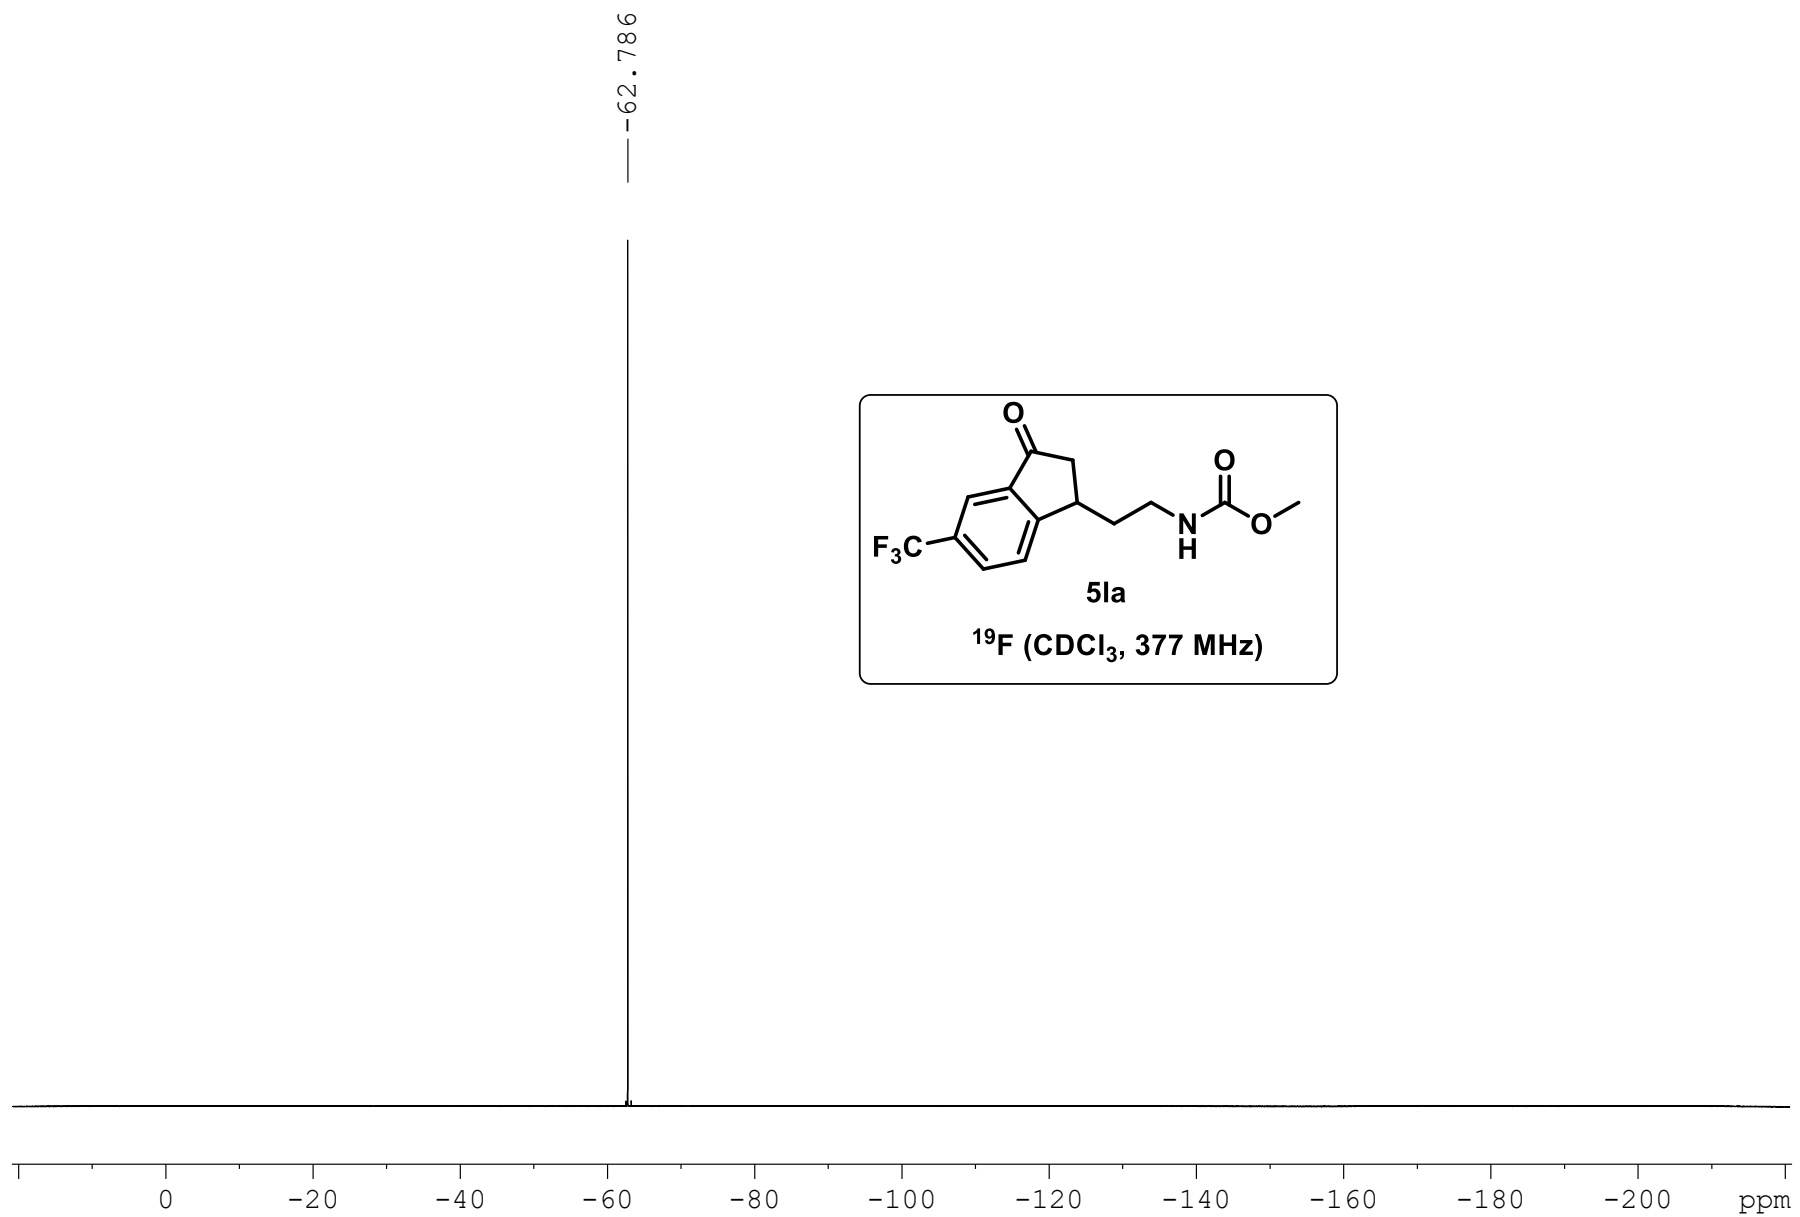

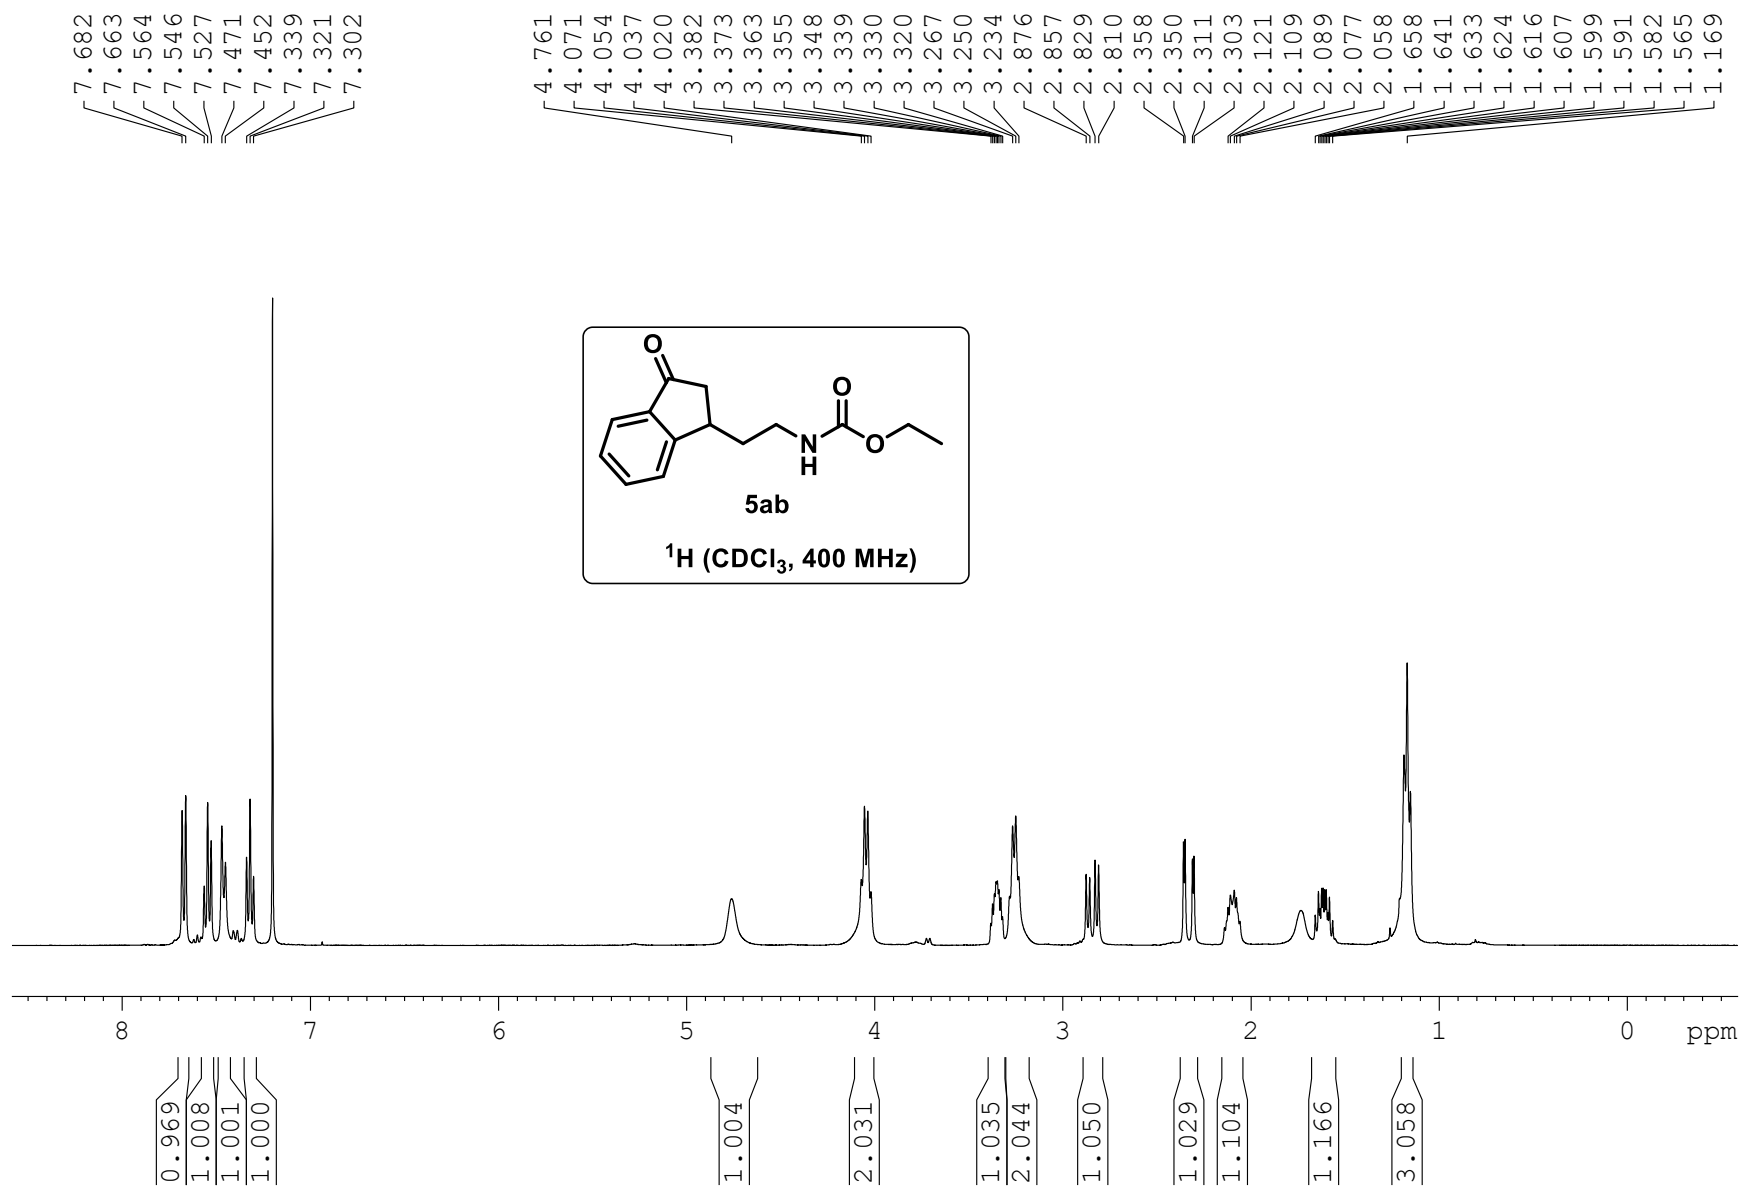

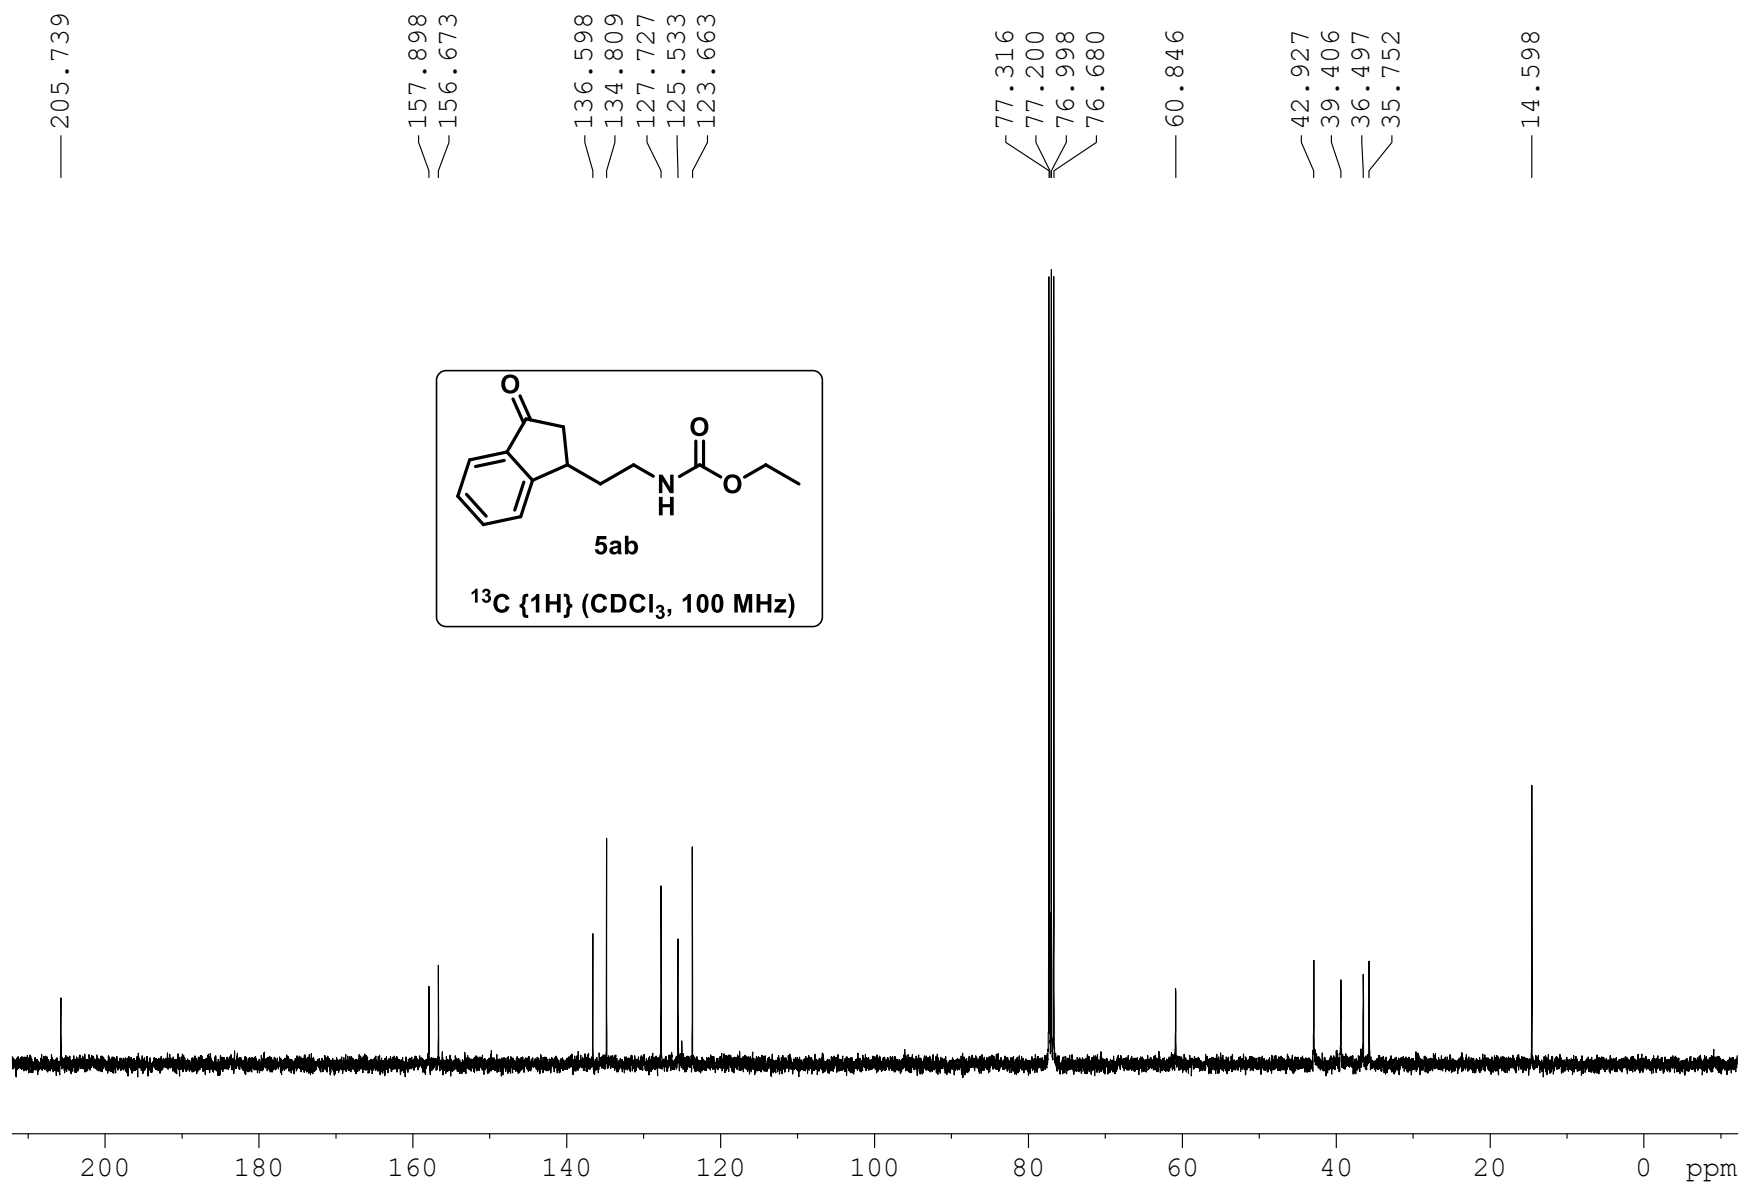

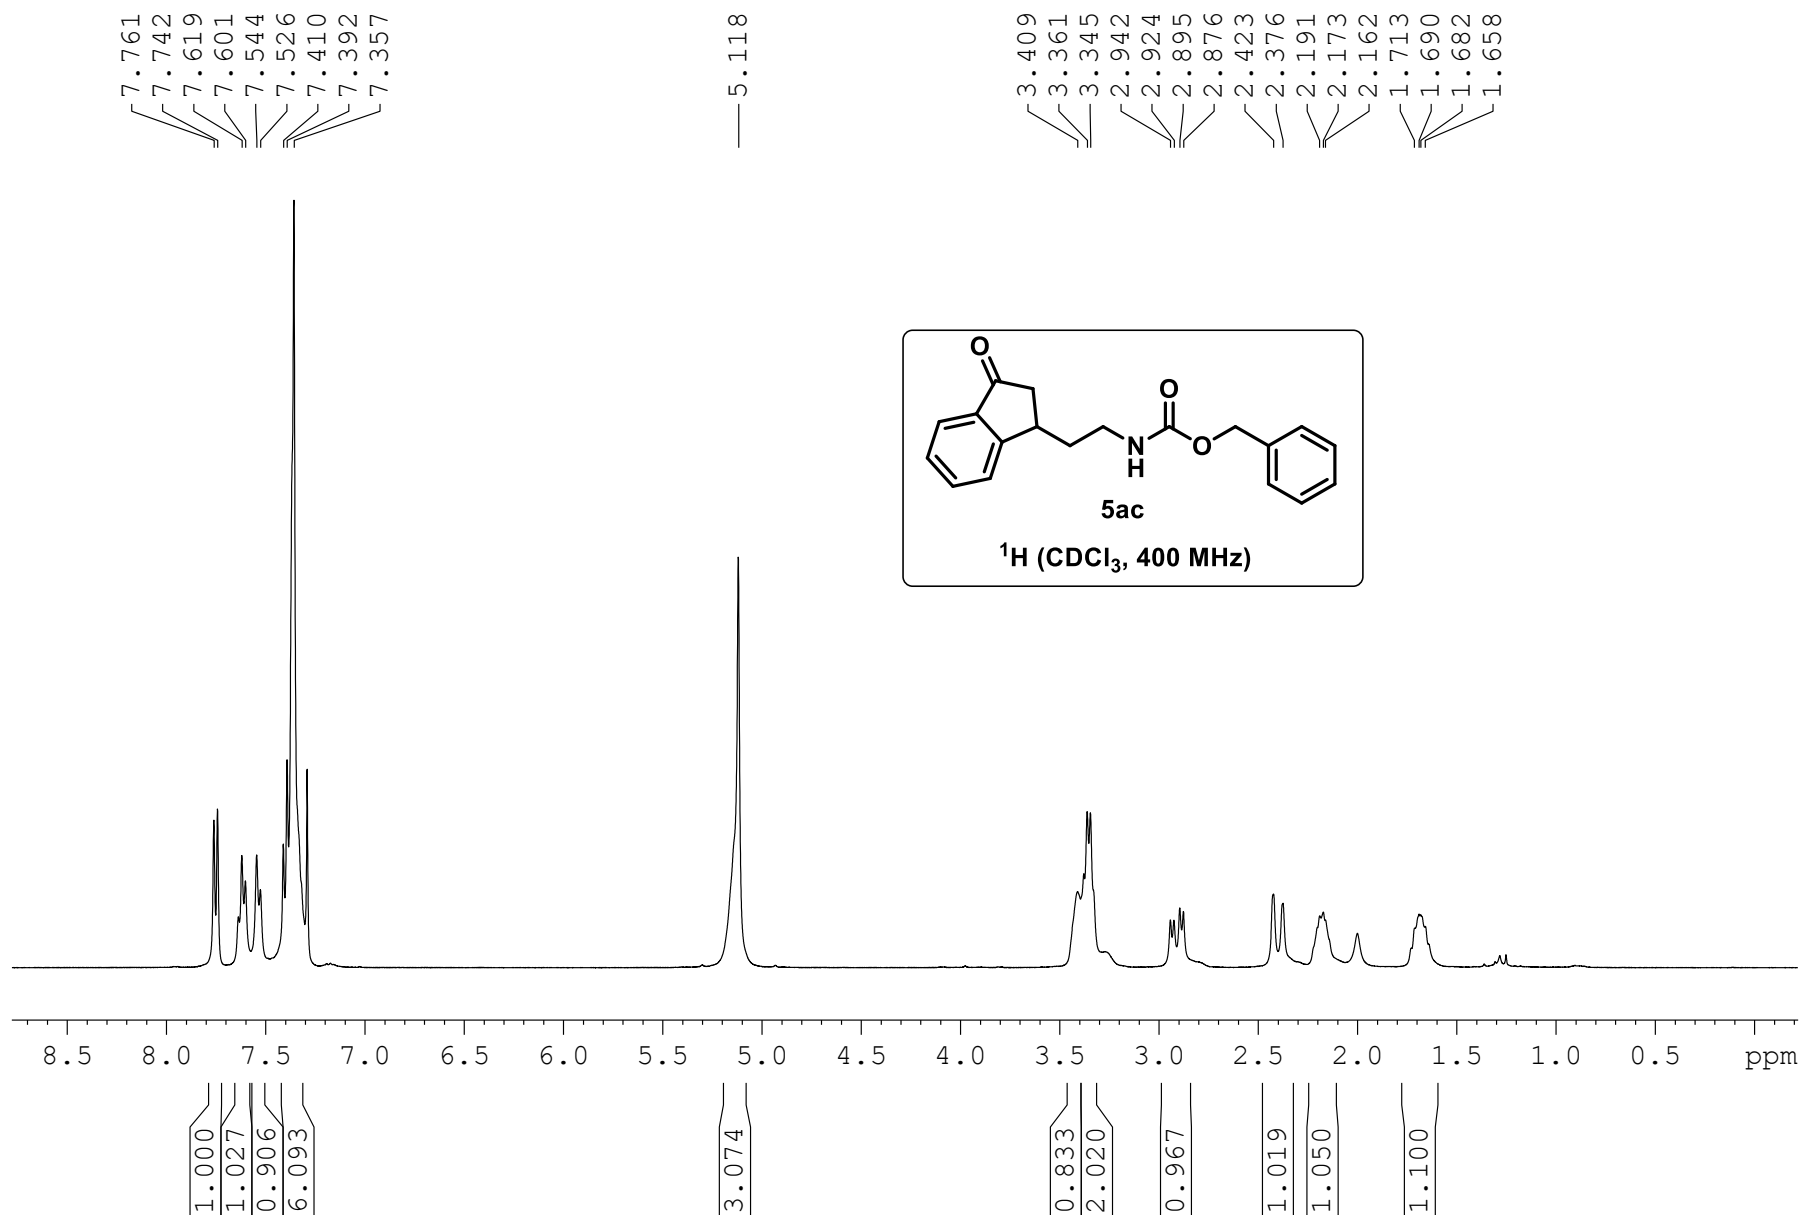

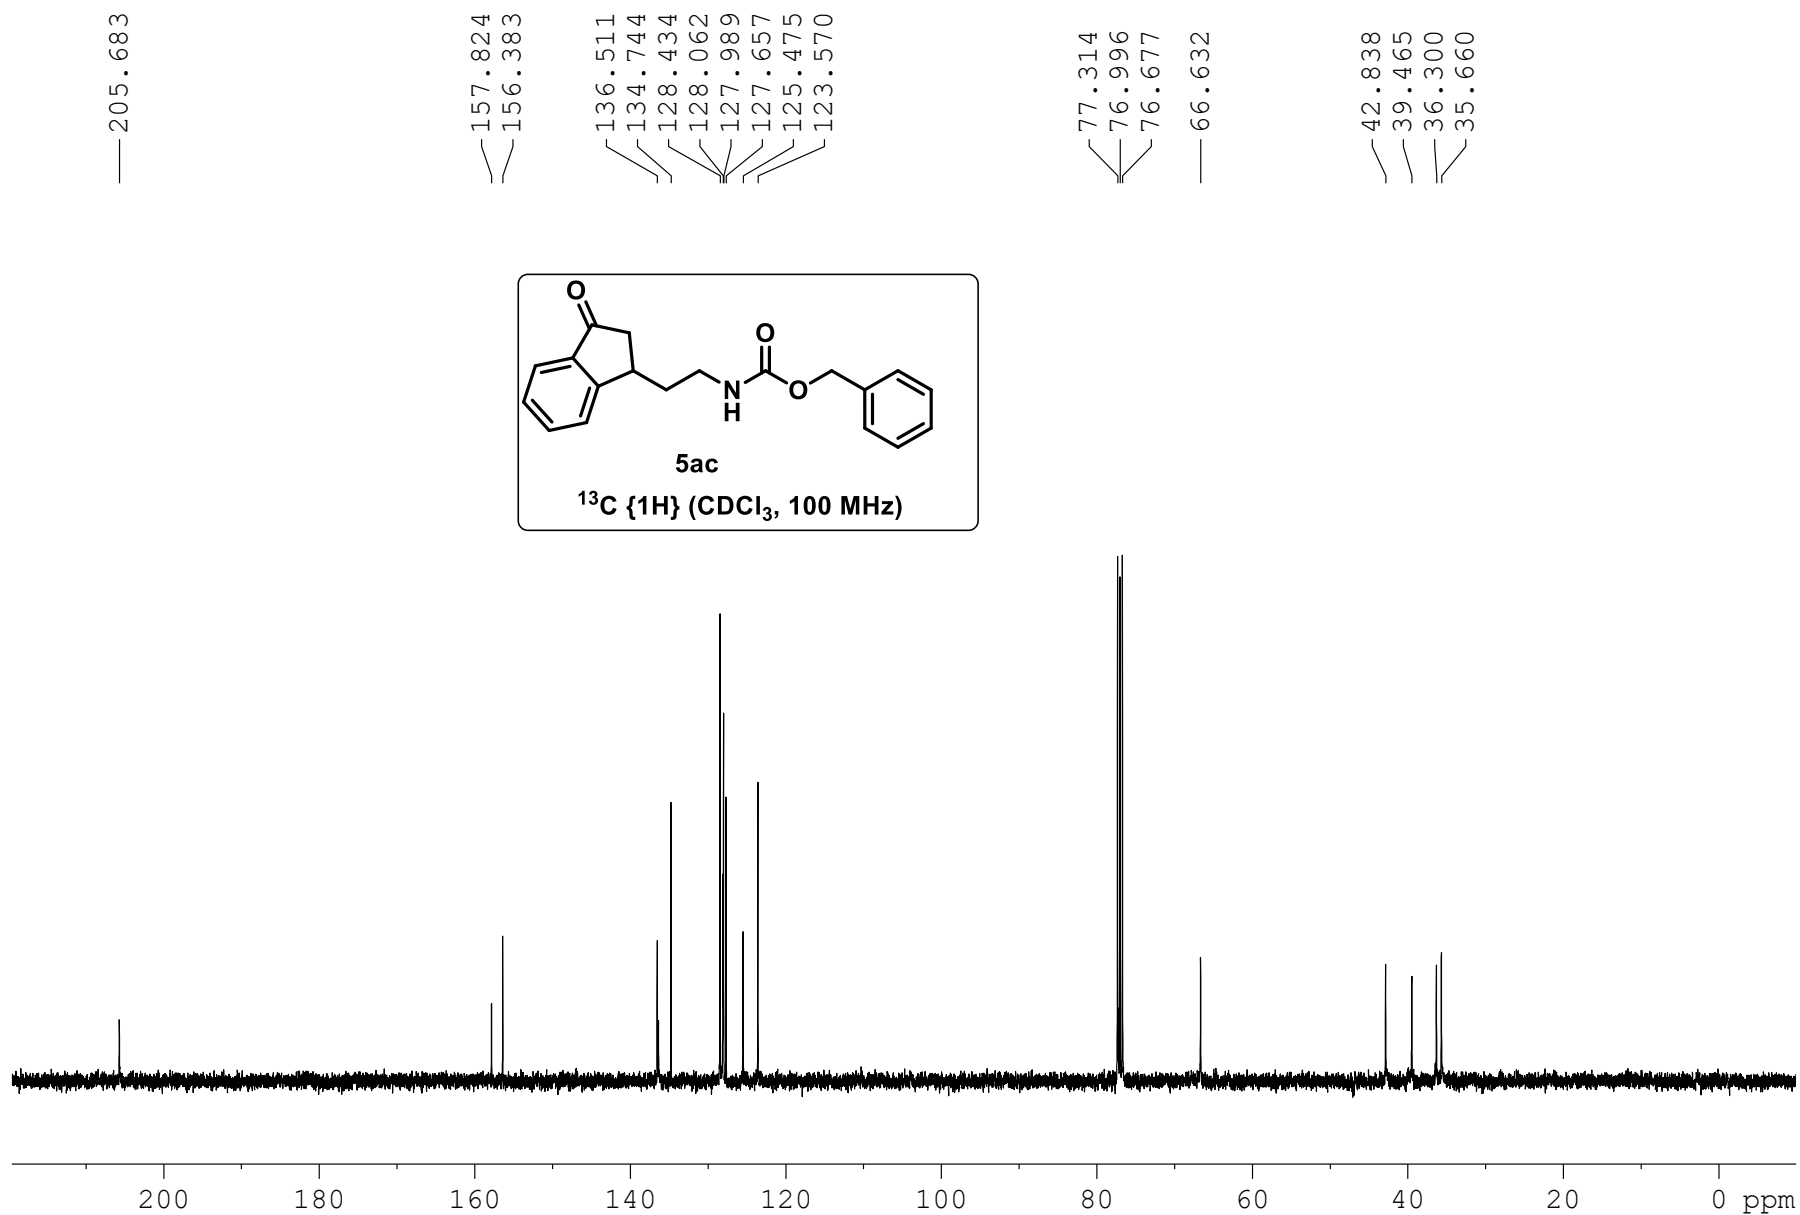

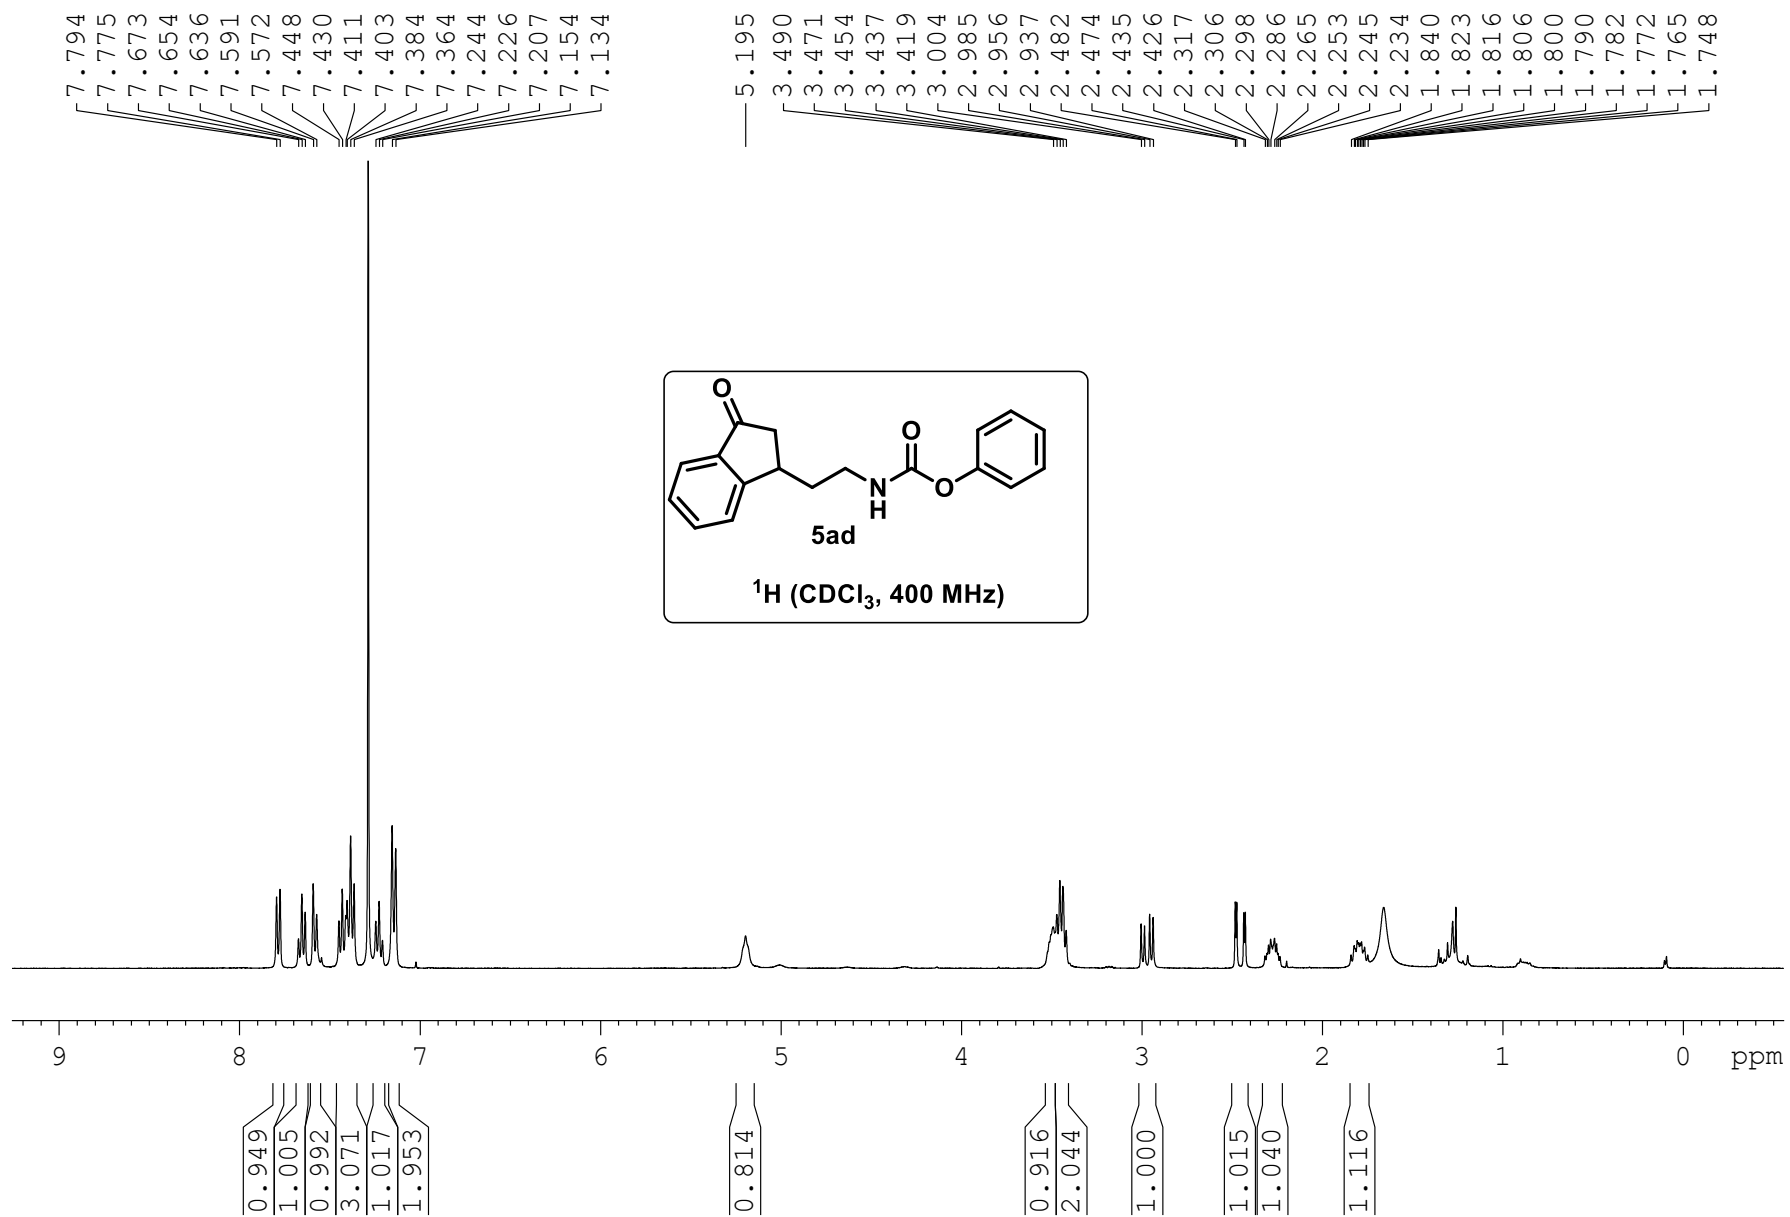

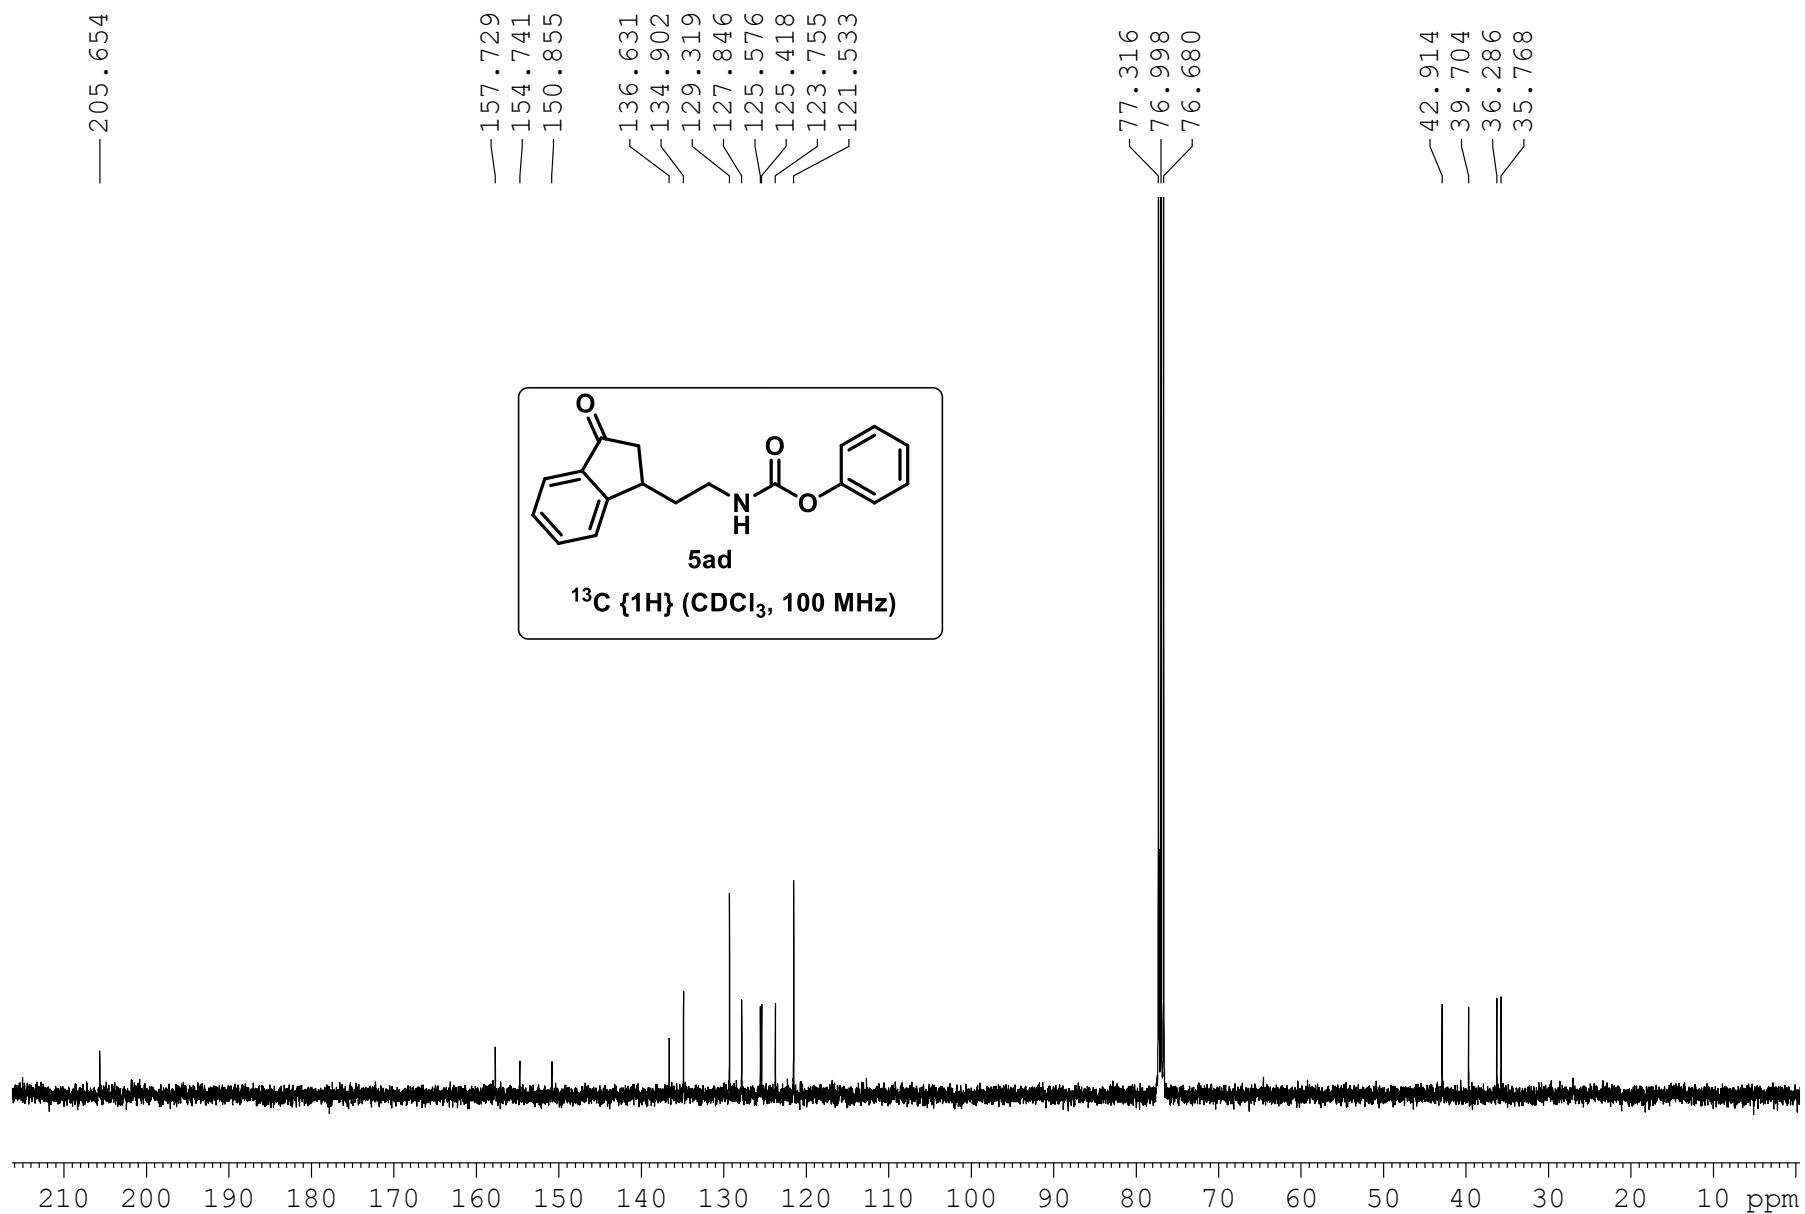



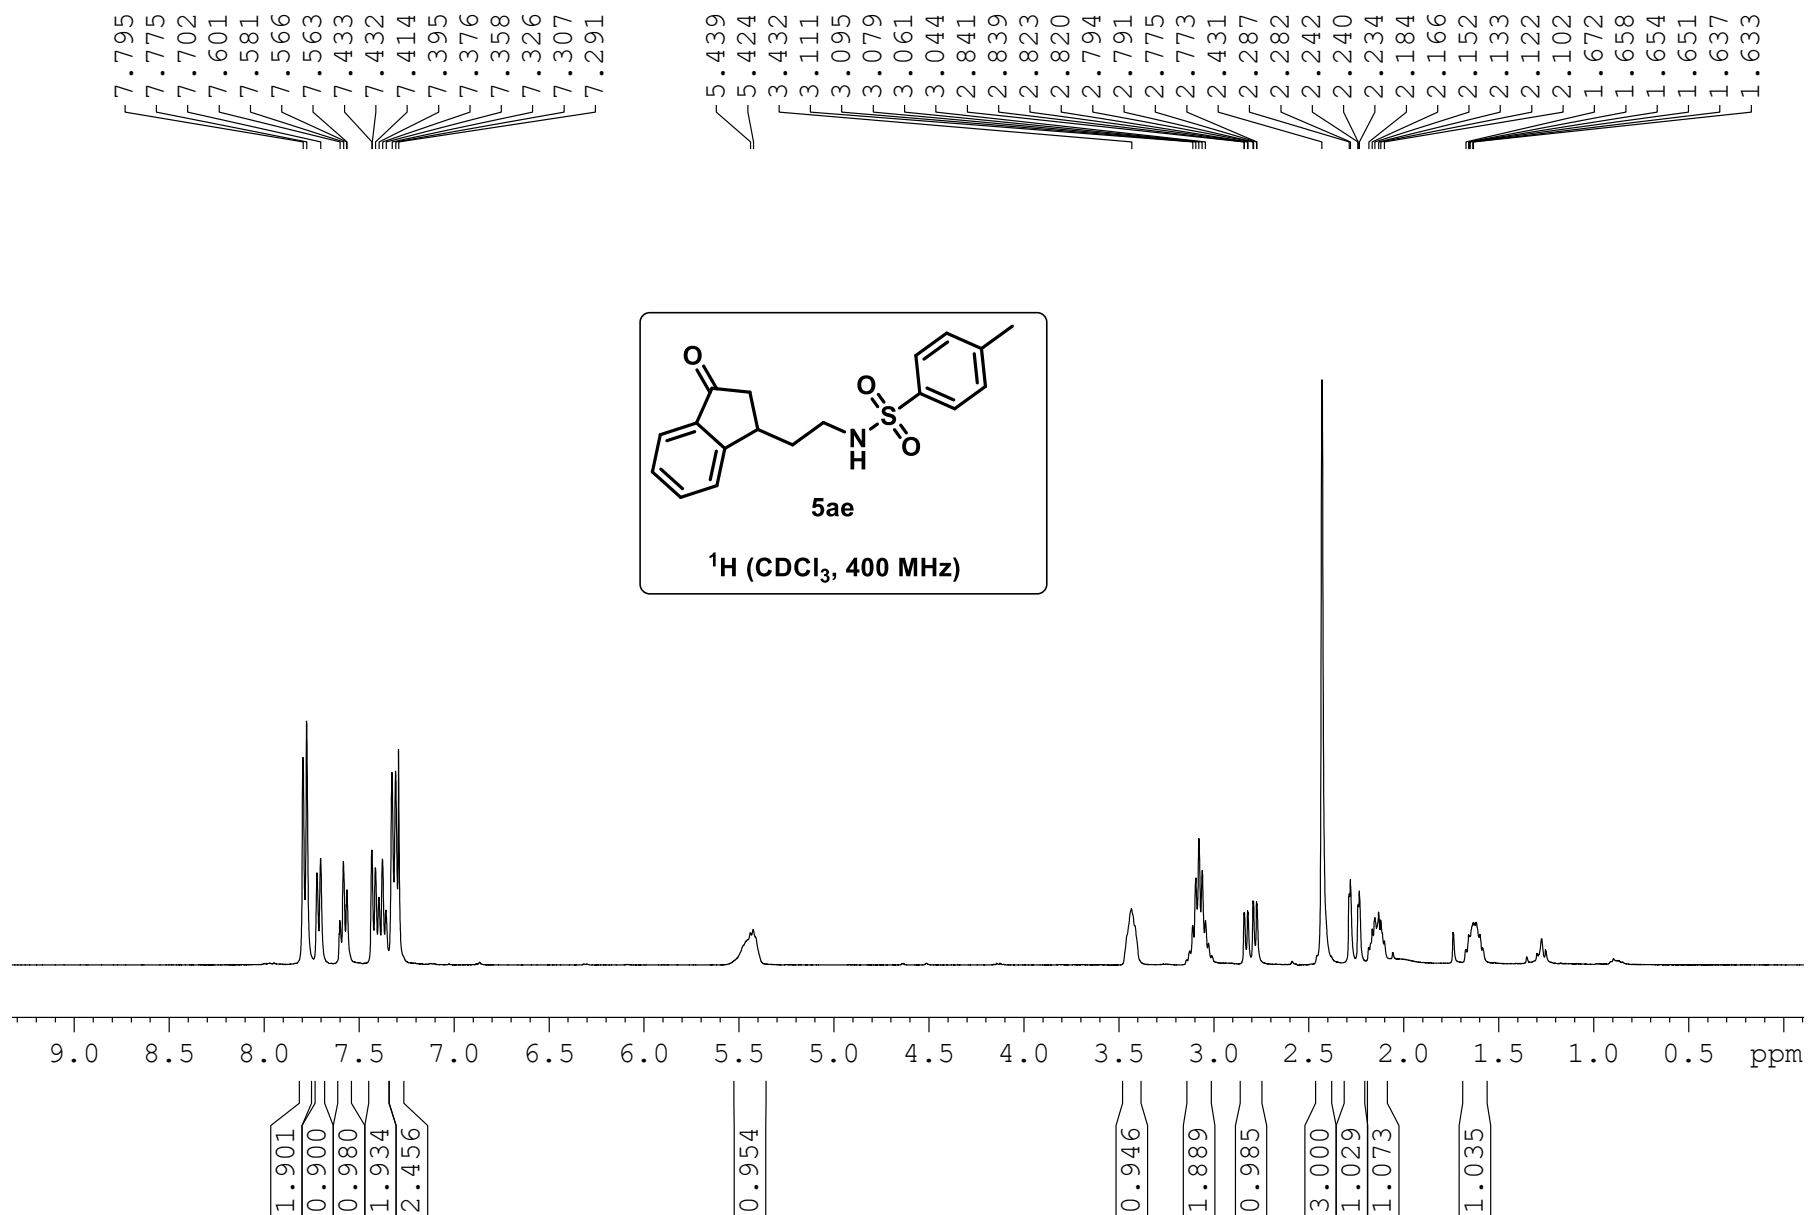

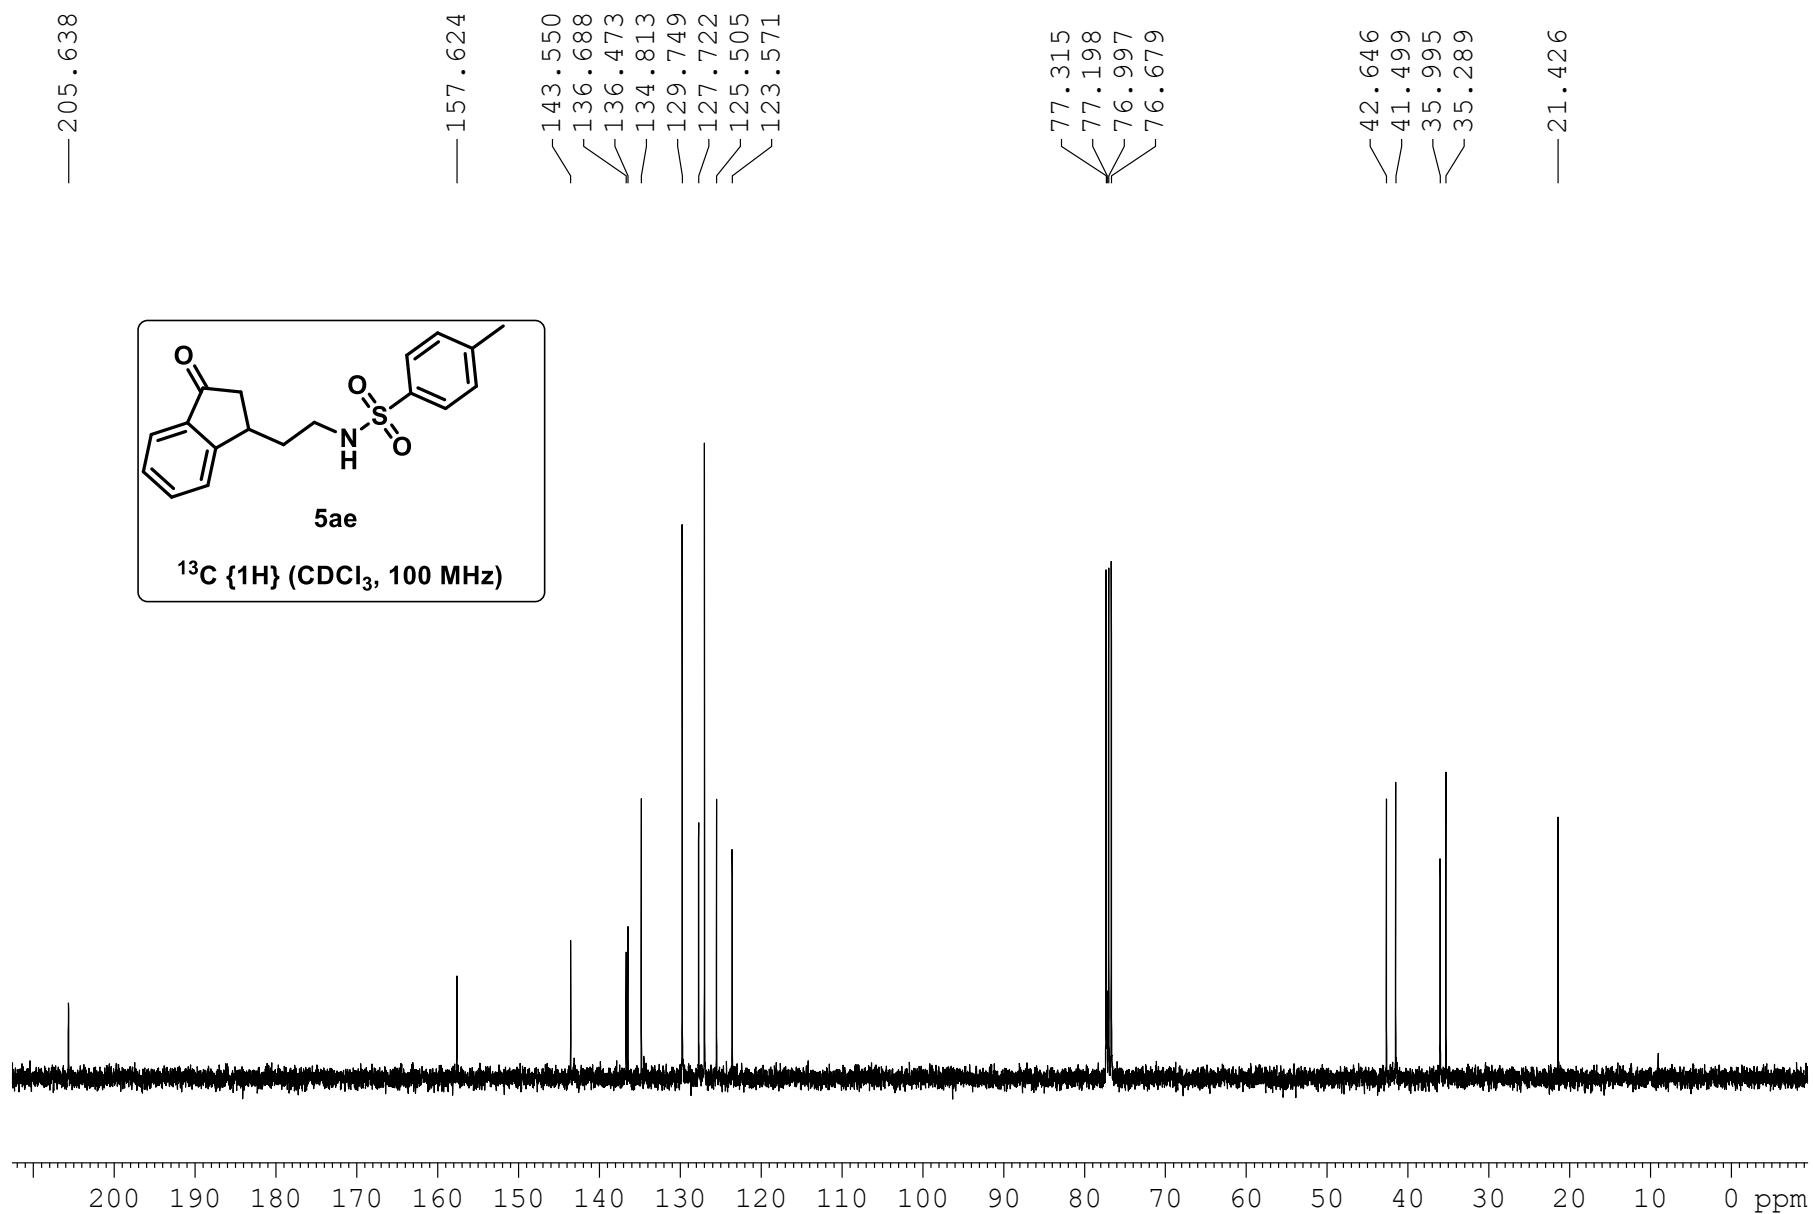

Supplement: d3cc01657a1.pdf [file d3cc01657a1.pdf]
